# Supplementary material for: CTP promotes efficient ParB-dependent DNA condensation by facilitating one-dimensional diffusion from parS
Source: eLife. 2021 Jul 12;10:e67554. doi: 10.7554/eLife.67554 (PMC8299390; doi:10.7554/eLife.67554)
Supplement: Figure 1—figure supplement 1—source data 1. [file elife-67554-fig1-figsupp1-data1.xlsx]

## Sheet: Fig1-Suppl1
Figure 1 Supplement 1B
		3,-20201020	3,-20201020	4,-20201103	4,-20201103	5,-20201105	5,-20201105	6,-20201112	6,-20201112
PROTEIN + NUCLEOTIDE		SAMPLE 1-- CTP hydrolysis rate (per dimer ParB2; min-1)	SAMPLE 2 -- CTP hydrolysis rate (per dimer ParB2; min-1)	SAMPLE 1-- CTP hydrolysis rate (per dimer ParB2; min-1)	SAMPLE 2 -- CTP hydrolysis rate (per dimer ParB2; min-1)	SAMPLE 1-- NTP hydrolysis rate (per dimer ParB2; min-1)	SAMPLE 2 -- NTP hydrolysis rate (per dimer ParB2; min-1)	SAMPLE 1-- NTP hydrolysis rate (per dimer ParB2; min-1)	SAMPLE 2 -- NTP hydrolysis rate (per dimer ParB2; min-1)	PROMEDIO	STD. ERROR		PROTEIN + NUCLEOTIDE
wt ParB-CTP	no DNA	0.208651	0.207833			0.220429	0.216333	0.208894	0.214165	0.212717	0.0020732	no DNA	wt ParB-CTP
wt ParB-CTP	0,5 uM scrambled ParS	0.22256	0.219942	0.211501	0.217223	0.245009	0.236474	0.232699	0.232699	0.227264	0.0039748	0,5 uM scrambled ParS	wt ParB-CTP
wt ParB-CTP	0,5 uM 1x ParS	0.632149	0.657022	0.434634	0.451966	0.553619	0.485684	0.53945	0.526527	0.535131	0.0281	0,5 uM 1x ParS	wt ParB-CTP
wt ParB-CTP	0,5 uM 2x ParS	0.721823	0.677313	0.685868	0.548724	0.62275	0.636576	0.792638	0.710509	0.674525	0.0259	0,5 uM 2x ParS	wt ParB-CTP
wt ParB-CTP	0,25 uM 2x ParS	0.51482	0.593366	0.481246	0.495045	0.525797	0.556009	0.678882	0.668339	0.564188	0.0269	0,25 uM 2x ParS	wt ParB-CTP
wt ParB-CTP	0,75 uM 2x ParS	0.9663	0.878916	0.773035	0.861043	0.832017	0.822288	1.00468	1.10551	0.905473	0.0392	0,75 uM 2x ParS	wt ParB-CTP
wt ParB-CTP	1 uM 2x ParS	0.931936	1.00705	1.12641	1.00105	1.03446	1.02951	0.981722	1.1555	1.03345	0.0262	1 uM 2x ParS	wt ParB-CTP
wt ParB-ATP	0,5 uM 2x ParS	0.0189934	0.0189934	0.038178	0.0200043	0.0449585	0.0471775	0.0490568	0.0354537	0.0341019	0.0046079	0,5 uM 2x ParS	wt ParB-ATP
wt ParB-GTP	0,5 uM 2x ParS	0.0140842	0.0140842	0.0110857	0.0124319	0.0202082	0.0212324	0.0123283	0.00535673	0.0138515	0.0017862	0,5 uM 2x ParS	wt ParB-GTP
wt ParB-UTP	0,5 uM 2x ParS	0.0117933	0.0117933	0.00586921	0.00469128	0.0185013	0.0195255	0.0130085	0.00909759	0.011785	0.0018833	0,5 uM 2x ParS	wt ParB-UTP
wt ParB-CTPgS	no DNA	-0.000152395	-0.000316034	-0.00153489	-0.00809762	-0.00249374	0.000749396	0.00637697	0.00467657	-9.89687e-05	0.0015658	no DNA	wt ParB-CTPgS
wt ParB-CTPgS	0,5 uM scrambled ParS	-0.00178879	0.000993078	-0.00809762	-0.00422729	0.000237321	0.00143216	-0.000254562	0.000255556	-0.00143127	0.0011455	0,5 uM scrambled ParS	wt ParB-CTPgS
wt ParB-CTPgS	0,5 uM 1x ParS	0.00132036	0.00933867	-0.00624659	-0.00792934	0.0108202	0.00126147	0.0026361	0.0034863	0.0018359	0.0023195	0,5 uM 1x ParS	wt ParB-CTPgS
wt ParB-CTPgS	0,5 uM 2x ParS	-0.00097059	-0.000643312	-0.00607832	-0.00456384	0.00638222	0.0111616	0.0135186	0.00195595	0.00259529	0.0025263	0,5 uM 2x ParS	wt ParB-CTPgS
Figure 1 Supplement 1C
		7,-20210205	7,-20210205	8,-20210208	8,-20210208
PROTEIN + NUCLEOTIDE		SAMPLE 1-- CTP hydrolysis rate (per dimer ParB2; min-1)	SAMPLE 2 -- CTP hydrolysis rate (per dimer ParB2; min-1)	SAMPLE 1-- CTP hydrolysis rate (per dimer ParB2; min-1)	SAMPLE 2 -- CTP hydrolysis rate (per dimer ParB2; min-1)	MEAN	STD. ERROR
wt ParB-CTP	no DNA	0.169038	0.198046	0.179396	0.174318	0.1802	0.0063135
wt ParB-CTP	0,5 uM scrambled ParS	0.183625	0.165557	0.18644	0.177758	0.178345	0.0046304
wt ParB-CTP	0,5 uM 2x ParS	0.790806	0.716214	0.772066	0.735699	0.753696	0.0169
AF488 ParB-CTP	no DNA	0.0225056	0.0235002	0.0288535	0.0277069	0.0256416	0.0015546
AF488 ParB-CTP	0,5 uM scrambled ParS	0.0339431	0.028473	0.109449	0.0442518	0.0540292	0.0188
AF488 ParB-CTP	0,5 uM 2x ParS	0.39928	0.471717	0.371711	0.442477	0.421296	0.0222
AF488 ParB-CTPgS	no DNA	-0.0136302	-0.0181057	-0.0035811	0.00411804	-0.00779974	0.0050003
AF488 ParB-CTPgS	0,5 uM scrambled ParS	-0.00401606	-0.0162823	-0.0050554	-0.0109526	-0.0090766	0.0028464
AF488 ParB-CTPgS	0,5 uM 2x ParS	-0.0139617	-0.0162823	0.0036266	-0.00521921	-0.00795916	0.0045373
