# Supplementary material for: CTP promotes efficient ParB-dependent DNA condensation by facilitating one-dimensional diffusion from parS
Source: eLife. 2021 Jul 12;10:e67554. doi: 10.7554/eLife.67554 (PMC8299390; doi:10.7554/eLife.67554)
Supplement: Figure 1—figure supplement 4—source data 1. [file elife-67554-fig1-figsupp4-data1.xlsx]

## Sheet: Fig1-Suppl4
Figure 1 Supplement 4D						Figure 1 Supplement 4C
	Time (s)	No CTP	CTP	CTPgS
	0	10.0897	31.5539	32.6692		CTPgS		CTP
	0.02456	9.5641	31.2808	31.9231		Position (um)	Photons	Position (um)	Photons
	0.04911	10.4872	30.7808	31.3769		0	3.30935	0.00143	7.07529
	0.07367	9.96795	31.9654	33.2077		0.10012	3.19733	0.10155	7.0296
	0.09823	9.82692	29.9846	31.3231		0.20024	3.34941	0.20167	6.89575
	0.12279	9.78846	30.0115	30.8154		0.30036	3.36721	0.30178	6.66731
	0.14734	9.80769	30.0385	32.6461		0.40048	3.38427	0.4019	6.59331
	0.1719	9.72436	29.7154	34.2538		0.50059	3.33605	0.50202	6.22265
	0.19646	9.40385	30.7692	32.3154		0.60071	3.2092	0.60214	5.73037
	0.22102	9.78205	29.2192	32.1385		0.70083	3.16691	0.70226	5.39768
	0.24557	9.60256	30.2538	31.2538		0.80095	2.97181	0.80238	4.81403
	0.27013	9.8718	29.9308	30.7231		0.90107	2.82344	0.9025	4.75097
	0.29469	9.30128	29.0539	32.3		1.00119	2.86573	1.00262	4.40605
	0.31924	9.55128	28.6346	31.6		1.10131	2.6862	1.10274	4.2471
	0.3438	8.98077	28.9808	32.1308		1.20143	2.67507	1.20286	4.16538
	0.36836	9.16667	28.6846	30.2231		1.30155	2.63353	1.30297	4.00129
	0.39292	9.87821	27.85	30.4692		1.40167	2.72478	1.40309	3.89447
	0.41747	9.53846	26.2769	28.5539		1.50178	2.74481	1.50321	3.81789
	0.44203	9.07051	26.9962	30.7231		1.6019	2.66988	1.60333	3.74131
	0.46659	7.87179	28.15	29		1.70202	2.523	1.70345	3.73102
	0.49115	8.92308	28.2923	29.3308		1.80214	2.41543	1.80357	4.17954
	0.5157	8.98718	27.0962	27.5692		1.90226	2.53042	1.90369	4.46525
	0.54026	9.09615	27.0808	29.4538		2.00238	2.4503	2.00381	4.60746
	0.56482	9.60256	26.5269	30.9615		2.1025	2.43917	2.10393	4.36165
	0.58937	8.94872	27.7038	29.0462		2.20262	2.42285	2.20404	4.32432
	0.61393	9.1859	25.7654	29.4769		2.30274	2.58086	2.30416	4.37259
	0.63849	8.59615	26.3731	27.6154		2.40286	2.56009	2.40428	4.53153
	0.66305	9.10897	27.0115	30.3846		2.50297	2.50371	2.5044	4.58172
	0.6876	8.76282	25.9038	28.9077		2.60309	2.44659	2.60452	4.51737
	0.71216	8.44872	25.5615	27.3231		2.70321	2.60089	2.70464	4.50257
	0.73672	8.55128	24.8	29.1077		2.80333	2.57938	2.80476	4.68983
	0.76128	8.44872	26.1923	28.4769		2.90345	2.43101	2.90488	4.78507
	0.78583	8.59615	25.2038	26.7462		3.00357	2.62389	3.005	4.9009
	0.81039	9.62821	26.5115	28.1538		3.10369	2.84644	3.10512	4.97619
	0.83495	8.35897	25.65	26.8308		3.20381	3.00148	3.20523	4.9749
	0.8595	8.28205	25.4885	26.5462		3.30393	2.98739	3.30535	5.01287
	0.88406	8.42949	26.3308	27.3539		3.40404	3.06009	3.40547	5.10103
	0.90862	8.51923	23.8923	26.4		3.50416	3.26113	3.50559	5.22072
	0.93318	8.53205	26.2885	27.5385		3.60428	3.27151	3.60571	5.08237
	0.95773	7.9359	25.5731	27.2615		3.7044	3.63872	3.70583	5.43951
	0.98229	7.92308	24.5038	27.5154		3.80452	3.88576	3.80595	5.50708
	1.00685	8.08974	23.8269	27.4461		3.90464	3.93472	3.90607	5.83205
	1.0314	7.75641	23.3346	27.1615		4.00476	4.20846	4.00619	6.34749
	1.05596	7.89103	23.8961	27.3769		4.10488	4.39837	4.1063	6.64157
	1.08052	8.88462	24.2885	27.7462		4.205	4.53412	4.20642	6.84299
	1.10508	8.08333	23.8846	27.7692		4.30512	4.69881	4.30654	6.69434
	1.12963	8	24.55	26.7231		4.40523	5.20475	4.40666	6.96782
	1.15419	8.23718	24.0423	26		4.50535	5.42211	4.50678	7.99356
	1.17875	8.38462	23.6269	25.4769		4.60547	5.30564	4.6069	8.8314
	1.20331	7.55769	23.0115	26.8846		4.70559	4.83605	4.70702	7.18082
	1.22786	8.23077	21.7346	26.1615		4.80571	3.66395	4.80714	4.4009
	1.25242	8.40385	24.7	26.2077		4.90583	2.54228	4.90726	2.50579
	1.27698	7.92308	23.1346	27.9692		5.00595	2.22329	5.00738	2.15187
	1.30153	7.83333	23.2808	26.2769		5.10607	2.37611	5.10749	2.24067
	1.32609	7.57051	23.9038	24.2769		5.20619	2.05267	5.20761	2.02831
	1.35065	7.73077	21.6538	25.9231		5.3063	1.77671	5.30773	1.80116
	1.37521	7.53205	22.7538	26.5615		5.40642	1.80786	5.40785	1.64479
	1.39976	7.24359	23.7077	26.1077		5.50654	1.78932	5.50797	1.54955
	1.42432	7.76282	22.4154	24.9846		5.60666	1.76039	5.60809	1.54955
	1.44888	8.19231	21.8462	25.7462		5.70678	1.75519	5.70821	1.49099
	1.47344	7.58974	22.9385	25.5077		5.8069	1.78116	5.80833	1.47619
	1.49799	7.65385	23.2231	25.6385		5.90702	1.78264	5.90845	1.47297
	1.52255	7.14744	23.3039	24.4461		6.00714	1.7908	6.00857	1.53539
	1.54711	7.3141	22.4538	26.0385		6.10726	1.78709	6.10868	1.45946
	1.57166	8.0641	22.2885	26.6		6.20738	1.773	6.2088	1.41892
	1.59622	7.35256	23.0615	25.2231		6.30749	1.79377	6.30892	1.38739
	1.62078	7.26923	22.1385	25.6846		6.40761	1.79896	6.40904	1.40347
	1.64534	7.20513	22.4538	25.4769		6.50773	1.76855	6.50916	1.33912
	1.66989	8.05769	22.6769	25.9		6.60785	1.86721	6.60928	1.3713
	1.69445	7.09615	21.5962	25.1077		6.70797	1.84496	6.7094	1.34106
	1.71901	7.54487	23.3808	24.8308		6.80809	1.72849	6.80952	1.35264
	1.74357	7.82692	20.5654	25.4231		6.90821	1.79006	6.90964	1.33526
	1.76812	7.50641	21.1846	25.5231		7.00833	1.76335	7.00975	1.40541
	1.79268	7.53846	22.5346	24.7462		7.10845	1.773	7.10987	1.32046
	1.81724	7.47436	21.6808	24.3846		7.20857	1.83086	7.20999	1.35714
	1.84179	7.82051	20.4346	25.3692		7.30868	1.89985	7.31011	1.50772
	1.86635	7.78846	20.9538	23.3077		7.4088	1.92656	7.41023	1.70013
	1.89091	7.05128	19.7154	23.0154		7.50892	2.16988	7.51035	2.24839
	1.91547	7.78846	19.7231	23.9		7.60904	2.70104	7.61047	3.00772
	1.94002	7.33333	19.5769	24.0846		7.70916	3.65208	7.71059	3.48649
	1.96458	7.07051	19.7346	24.9769		7.80928	4.04377	7.81071	3.45367
	1.98914	7.69872	20.8423	25.0308		7.9094	3.6276	7.91083	3.28636
	2.0137	6.53205	20.25	26.2769		8.00952	3.88353	8.01094	3.88803
	2.03825	6.61538	20.9538	23.5231		8.10964	4.29525	8.11106	4.65637
	2.06281	8	19.8154	24.6769		8.20975	3.58976	8.21118	4.70077
	2.08737	7.64103	20.1192	23.6308		8.30987	2.89243	8.3113	4.14414
	2.11192	7.61538	19.9885	25.0615		8.40999	2.80861	8.41142	3.61969
	2.13648	7.20513	19.3308	23.9231		8.51011	2.90801	8.51154	3.47941
	2.16104	7.24359	20.2038	24.0385		8.61023	2.72923	8.61166	3.70721
	2.1856	7.3141	20.4423	22.4615		8.71035	3.00223	8.71178	4.27799
	2.21015	7.05769	20.0692	23.7		8.81047	3.74332	8.8119	5.07851
	2.23471	7.10897	20.8961	24.6769		8.91059	4.7322	8.91202	5.70463
	2.25927	7.29487	19.4461	24.2077		9.01071	4.88724	9.01213	5.40347
	2.28383	6.94231	20.9346	24.4846		9.11083	4.31306	9.11225	4.95689
	2.30838	7.42308	20.4038	23.4538		9.21094	4.9043	9.21237	4.46718
	2.33294	7.07051	19.6615	23.6154		9.31106	5.91395	9.31249	4.4704
	2.3575	7.07692	20.2462	24.4385		9.41118	5.6135	9.41261	4.73037
	2.38205	7.19872	21.0731	23.5154		9.5113	5.03264	9.51273	4.9955
	2.40661	6.92308	19.5885	23.2308		9.61142	5.05415	9.61285	5.12613
	2.43117	7.25	18.1538	22.7462		9.71154	4.9681	9.71297	4.88353
	2.45573	7.03205	20.25	23.7385		9.81166	4.77226	9.81309	4.45302
	2.48028	7.15385	19.3154	21.6		9.91178	5.56306	9.9132	4.09331
	2.50484	6.36538	20.1423	23.7538		10.0119	5.28487	10.0133	3.84041
	2.5294	6.25	19.4885	23.3462		10.112	3.7819	10.1134	3.2677
	2.55396	7.02564	20.0231	23.4		10.2121	3.25148	10.2136	2.60232
	2.57851	6.79487	20.0654	21.6538		10.3123	3.40208	10.3137	2.30888
	2.60307	7.14744	18.6808	21.3		10.4124	3.00964	10.4138	2.23616
	2.62763	7.16667	18.6308	22.9308		10.5125	2.57418	10.5139	2.21815
	2.65218	7.61538	19.9115	22.9692		10.6126	2.59941	10.614	2.17375
	2.67674	7.22436	20.9115	22.1692		10.7127	2.48887	10.7142	2.14672
	2.7013	6.71154	19.7385	22.0231		10.8128	2.5549	10.8143	2.17246
	2.72586	6.64744	20.7	23.4846		10.913	2.41766	10.9144	2.26062
	2.75041	7.33974	19.3039	22.8462		11.0131	2.36424	11.0145	2.20013
	2.77497	6.33333	19.1808	22.3615		11.1132	2.30193	11.1146	2.1686
	2.79953	6.8141	18.8692	23.1923		11.2133	2.27967	11.2148	2.12033
	2.82408	6.89744	18.7615	22.2923		11.3134	2.31751	11.3149	2.05341
	2.84864	6.49359	18.7538	21.4385		11.4136	2.38872	11.415	2.04247
	2.8732	7.07051	19.4077	21.3385		11.5137	2.16691	11.5151	2.0103
	2.89776	6.64103	19.6461	21.8308		11.6138	2.27671	11.6152	2.09717
	2.92231	6.64103	19.2885	21.9923		11.7139	2.31602	11.7154	2.17246
	2.94687	6.77564	17.8462	22.4538		11.814	2.22997	11.8155	2.15959
	2.97143	7.17308	19.4654	23.0385		11.9142	2.31157	11.9156	2.29923
	2.99599	6.49359	21.6346	21.5846		12.0143	2.41246	12.0157	2.31467
	3.02054	5.98718	17.7692	20.8615		12.1144	2.51335	12.1158	2.41441
	3.0451	6.42949	18.0385	23.1077		12.2145	2.55193	12.2159	2.52124
	3.06966	6.96154	19.6538	19.9846		12.3146	2.61424	12.3161	2.61905
	3.09421	7.41667	19.1077	21.4308		12.4147	2.64243	12.4162	2.78443
	3.11877	6.26282	18.8115	22.0231		12.5149	3.04896	12.5163	2.92986
	3.14333	6.91667	18.6346	21.5769		12.615	3.62611	12.6164	3.06435
	3.16789	6.19231	18.6615	21.2308		12.7151	3.60979	12.7165	3.43115
	3.19244	6.51282	18.7923	20.6461		12.8152	3.84718	12.8166	4.50322
	3.217	6.10897	17.2538	20.7308		12.9154	4.32715	12.9168	6.22458
	3.24156	6.38462	19.0731	20.8615		13.0155	4.35534	13.0169	7.17889
	3.26612	5.89103	17.7192	22.0923		13.1156	4.20623	13.117	7.12162
	3.29067	6.52564	17.9808	21.8923		13.2157	4.06677	13.2171	7.22072
	3.31523	6.17308	18.1346	21.4846		13.3158	4.04822	13.3172	7.21815
	3.33979	6.12179	18.6308	21.2462		13.4159	4.02967	13.4174	7.26255
	3.36434	5.73718	17.5192	21.2		13.5161	4.02671	13.5175	6.9897
	3.3889	6.10256	17.8923	20.4615		13.6162	4.03338	13.6176	6.52767
	3.41346	5.77564	17.4615	20.9692		13.7163	3.75519	13.7177	5.95496
	3.43802	5.64103	17.9654	19.7462		13.8164	3.55045	13.8178	5.56885
	3.46257	6.23077	17.3961	21.1846		13.9165	3.49777	13.918	4.94208
	3.48713	6.25	17.4038	20.2462		14.0167	3.39763	14.0181	4.787
	3.51169	5.82051	17.5615	20.2923		14.1168	3.25519	14.1182	4.68597
	3.53625	5.73718	17.1039	20.7308		14.2169	3.23516	14.2183	4.32497
	3.5608	5.89103	17.7615	21.2538		14.317	3.11276	14.3184	4.21171
	3.58536	5.99359	16.3961	23.0154		14.4171	2.98442	14.4186	3.93951
	3.60992	6.47436	17.3769	22.7385		14.5173	2.73813	14.5187	3.83333
	3.63447	6.25	17.9385	20.7846		14.6174	2.63056	14.6188	3.83719
	3.65903	6.01923	16.3154	20.9615		14.7175	2.54154	14.7189	3.80759
	3.68359	6.00641	17.8346	21.2846		14.8176	2.46439	14.819	3.67181
	3.70815	5.89744	17.4154	21.0308		14.9177	2.52819	14.9192	3.46976
	3.7327	6.51923	17.4308	20.5769		15.0178	2.45178	15.0193	3.45882
	3.75726	5.77564	16.4192	19.6308		15.118	2.39837	15.1194	3.25354
	3.78182	6.04487	16.9962	20.0308		15.2181	2.4043	15.2195	3.12934
	3.80638	5.75	17.2962	20.3077		15.3182	2.37018	15.3196	3.19562
	3.83093	5.85897	17.4461	21.3077		15.4183	2.44807	15.4198	3.12548
	3.85549	5.77564	18.4654	19.9769		15.5184	2.46439	15.5199	3.10682
	3.88005	6.37179	16.9	20.5539		15.6186	2.60608	15.62	2.97555
	3.9046	5.52564	17.5	20.9385		15.7187	2.69659	15.7201	3.08301
	3.92916	5.49359	16.5654	19.3769		15.8188	2.72478	15.8202	3.15187
	3.95372	5.85256	17.1231	19.7385		15.9189	2.75519	15.9203	3.0296
	3.97828	5.74359	16.4808	20.7923		16.019	2.7678	16.0205	3.04633
	4.00283	5.51282	17.05	20		16.1192	2.91914	16.1206	3.20849
	4.02739	5.76923	16.1692	20.0539		16.2193	3.05935	16.2207	3.37452
	4.05195	5.76282	16.2154	19.4154		16.3194	3.34421	16.3208	3.47104
	4.07651	5.32692	17.0769	19.8077		16.4195	4.26335	16.4209	3.78893
	4.10106	5.5	17.1385	20.0846		16.5196	5.0905	16.5211	4.00901
	4.12562	5.94872	16.4615	18.7769		16.6197	5.02374	16.6212	4.14801
	4.15018	5.78846	16.8269	20.2385		16.7199	4.51706	16.7213	4.27477
	4.17473	5.74359	15.9385	19.9		16.82	4.15653	16.8214	4.49614
	4.19929	5.62821	17.2115	18.5615		16.9201	4.04896	16.9215	4.80695
	4.22385	5.87179	16.4308	20.4385		17.0202	4.08531	17.0217	5.33333
	4.24841	5.05128	17.4154	19.2385		17.1203	4.13502	17.1218	5.70656
	4.27296	5.67949	16.4962	19.9		17.2205	4.18472	17.2219	5.95109
	4.29752	5.42949	16.4346	19.8		17.3206	4.18101	17.322	6.22716
	4.32208	5.78846	16.1	20.3077		17.4207	4.16172	17.4221	6.42793
	4.34664	5.24359	16.3692	18.4538		17.5208	4.32047	17.5222	6.53925
	4.37119	5.69231	16.1846	18.6692		17.6209	4.34199	17.6224	6.68661
	4.39575	5.46154	16.3077	20.5385		17.7211	4.12685	17.7225	7.20914
	4.42031	5.71154	16.9923	20.1308		17.8212	4.07641	17.8226	7.85071
	4.44486	5.60897	16.2385	19.2846		17.9213	3.91246	17.9227	8.38031
	4.46942	5.46154	16	20.5077		18.0214	3.63056	18.0228	8.59073
	4.49398	6.14744	16.2885	19.9461		18.1215	3.03487	18.123	8.04504
	4.51854	5.44231	15.1154	18.2769		18.2217	2.80267	18.2231	6.84942
	4.54309	5.63462	16.0231	18.7308		18.3218	2.62315	18.3232	5.80952
	4.56765	5.41667	15.0115	19.1308		18.4219	2.4859	18.4233	4.28571
	4.59221	5.85256	14.6577	18.8077		18.522	2.30267	18.5234	3.51931
	4.61677	6.28205	15.2923	19.5		18.6221	17.4221	18.6236	3.1731
	4.64132	5.66667	15.1423	17.5154		18.7222	17.5222	18.7237	2.99807
	4.66588	5.72436	15.9	19.4308		18.8224	17.6224	18.8238	2.78571
	4.69044	5.61538	15.8423	18.5
	4.71499	5.48718	16.1039	18.7077
	4.73955	5.79487	14.9846	19.4615
	4.76411	5.5641	14.5038	19.0615
	4.78867	5.6859	15.7654	20
	4.81322	5.44872	15.6577	19.8769
	4.83778	5.77564	15.4231	18.4385
	4.86234	5.39744	15.5885	19.4308
	4.88689	5.54487	15.2577	18.8154
	4.91145	5.8141	14.7077	18.2923
	4.93601	5.42949	16.2731	20.1461
	4.96057	5.64744	15.7423	18.6769
	4.98512	5.73077	16.2346	18.6538
	5.00968	5.6859	16.6192	17.4538
	5.03424	5.38462	15.6231	19.0846
	5.0588	5.82692	15.3615	17.8077
	5.08335	5.10256	15.0385	17.0539
	5.10791	5.34615	15.5346	20.1769
	5.13247	5.09615	15.75	17.2077
	5.15702	5.61538	14.5923	18.5923
	5.18158	6.03205	14.9192	18.5539
	5.20614	5.4359	15.1	17.9308
	5.2307	5.47436	15.3423	19.4769
	5.25525	5.80128	15.7231	18.2538
	5.27981	5.08333	14.5885	17.9385
	5.30437	5.22436	14.6385	18.4461
	5.32893	5.37821	15.6961	19.3154
	5.35348	5.85897	15.0308	17.6308
	5.37804	5.72436	14.5423	18.3846
	5.4026	5.98718	14.6077	16.9077
	5.42715	4.9359	14.9346	17.8539
	5.45171	6.02564	14.4846	17.4769
	5.47627	5.38462	15.9461	19.1923
	5.50083	5.72436	13.6231	19.1538
	5.52538	5.10897	14.3769	18.3385
	5.54994	5.53205	14.7423	18
	5.5745	5.28205	14.8231	17.5462
	5.59906	5.48077	13.6577	18.2231
	5.62361	5.55128	15.3615	17.5923
	5.64817	5.78846	14.5	17.8385
	5.67273	4.89103	13.3885	17.8692
	5.69728	5.66026	13.3308	17.4769
	5.72184	5.71154	13.7385	17.2462
	5.7464	5.60256	14.3231	17.6
	5.77096	5.47436	13.8692	18.5385
	5.79551	5.79487	13.7115	17.9461
	5.82007	5.5641	13.6577	18.0462
	5.84463	5.25	13.6961	17.3615
	5.86919	5.57692	14.4615	16.8692
	5.89374	4.98077	14.7462	18.0539
	5.9183	4.62821	12.9423	17.9769
	5.94286	5.34615	13.6539	16.7308
	5.96741	5.46154	14.0961	18.3077
	5.99197	5.07051	14.3615	17.0539
	6.01653	5.23718	14.3346	16.2923
	6.04109	5.40385	14.4346	17.8692
	6.06564	5.4359	14.4423	17.1769
	6.0902	5.26923	14.4308	16.8462
	6.11476	5.83333	13.2423	18.1769
	6.13932	5.28205	14.2885	17.6154
	6.16387	5.07051	13.7731	17.8077
	6.18843	5.22436	13.8231	18.1077
	6.21299	5.25	14.4423	18.0846
	6.23754	5.09615	14.4154	18.5615
	6.2621	4.95513	13.2038	16.9231
	6.28666	4.90385	13.1269	17.6615
	6.31122	5.01282	13.8731	16.3308
	6.33577	5.19872	12.7077	17.1077
	6.36033	4.79487	13.2731	16.1923
	6.38489	4.57051	13.4077	16.6615
	6.40945	5.21795	13.4423	15.9692
	6.434	4.92308	13.5423	17.3385
	6.45856	5.05128	12.8923	14.8923
	6.48312	5.01282	13.0346	16.8
	6.50767	4.74359	13.5961	17.6308
	6.53223	4.75	13.25	16.8462
	6.55679	6.64103	12.9423	16.9846
	6.58135	5.15385	13.9962	16.5769
	6.6059	4.67308	13.8731	16.2
	6.63046	5.1859	13.9	16.5154
	6.65502	5.48718	12.3654	16.8308
	6.67957	4.77564	13.9538	17.7
	6.70413	5.23718	13.3	15.8615
	6.72869	5.17308	12.5961	16.7231
	6.75325	5.14744	12.8385	15.3077
	6.7778	5.01282	13.2115	17.0462
	6.80236	4.71795	12.6885	15.7385
	6.82692	5.40385	13.3115	16.7385
	6.85148	4.9359	12.8269	17.1769
	6.87603	4.97436	13.6654	16.0539
	6.90059	4.6859	13.2385	16.5539
	6.92515	4.76282	13.3923	16.3077
	6.9497	5.27564	12.7885	16.0539
	6.97426	4.82051	12.3654	17.5154
	6.99882	4.8141	13.1539	17.0385
	7.02338	4.70513	13.0692	16.8154
	7.04793	4.78846	12.6769	16.8231
	7.07249	4.75	13.0154	16.6923
	7.09705	5.16026	13.0385	16.2154
	7.12161	5.01282	13.4962	16.1461
	7.14616	4.87821	12.9808	17.4615
	7.17072	4.53205	12.9962	16.0308
	7.19528	4.84615	12.5961	17.1461
	7.21983	5.01282	12.2577	17.2308
	7.24439	4.98077	12.8769	16.2692
	7.26895	4.89744	12.8615	15.5615
	7.29351	4.85256	12.7577	15.8231
	7.31806	4.69231	12.7385	16.5923
	7.34262	4.87179	12.0192	16.5077
	7.36718	4.58974	12.4654	15.3461
	7.39174	5.04487	11.7654	15.8615
	7.41629	4.97436	12.7538	16.7308
	7.44085	4.83974	11.8885	16.3539
	7.46541	5.07692	12.7462	15.9538
	7.48996	5.05128	12.1808	16.0308
	7.51452	4.89744	12.2731	16.7462
	7.53908	4.94872	12.6692	15.2846
	7.56364	4.71795	12.3962	15.8615
	7.58819	4.35256	11.6038	15.6615
	7.61275	4.73718	11.8115	15.8154
	7.63731	5.3141	12.0385	16.4692
	7.66187	4.47436	13.6769	15.9615
	7.68642	4.39103	12.2192	13.7923
	7.71098	4.90385	12.2269	15.6
	7.73554	4.72436	12.6654	16.4615
	7.76009	4.63462	12.0231	15.5
	7.78465	5.17949	12.1423	16.2923
	7.80921	4.74359	10.8269	16.4538
	7.83377	4.5	11.85	15.9615
	7.85832	4.75	11.9731	16.1077
	7.88288	5.25	11.8769	15.8077
	7.90744	5.17308	12.1654	15.2615
	7.932	5.29487	11.7077	15.1077
	7.95655	5.0641	11.3039	15.0769
	7.98111	5.5641	11.9346	16.8
	8.00567	4.49359	11.8654	14.8231
	8.03022	4.60897	11.9039	14.9923
	8.05478	4.69231	12.1269	15.6077
	8.07934	4.98718	11.7462	15.6231
	8.1039	4.58974	11.8731	16.3231
	8.12845	4.79487	11.6192	15.2846
	8.15301	4.36538	11.5731	15.6769
	8.17757	4.70513	11.3846	15.3615
	8.20213	4.92949	11.5692	14.7615
	8.22668	5.16026	11.4654	15.8923
	8.25124	4.78846	11.6192	15.3846
	8.2758	4.57051	12.2654	15.9461
	8.30035	4.71795	11.0385	15.4154
	8.32491	4.72436	11.6462	16.0308
	8.34947	4.90385	11.6231	15.1308
	8.37403	4.78205	10.95	14.9692
	8.39858	4.35256	11.0731	14.7615
	8.42314	5.15385	11.6539	15.0615
	8.4477	4.60897	11.4269	16.1692
	8.47225	5.23077	10.9192	15.3461
	8.49681	4.75641	11.3615	15.6615
	8.52137	4.99359	10.7077	15.9769
	8.54593	4.78846	11.4538	14.8461
	8.57048	4.8141	10.9808	15.4692
	8.59504	4.71795	11.1615	14.9385
	8.6196	4.69231	11.2308	14.8461
	8.64416	4.78846	10.4423	15.1539
	8.66871	4.50641	11.4154	15.6923
	8.69327	4.84615	10.8308	15.3
	8.71783	4.24359	10.5731	15.4923
	8.74238	4.17308	11.35	15.6539
	8.76694	4.28846	12.1269	15.7462
	8.7915	4.3141	11.0846	15.5539
	8.81606	4.4359	10.8269	15.5385
	8.84061	4.09615	10.9192	15
	8.86517	4.16667	11.5885	16.1077
	8.88973	4.88462	11.3423	16.8385
	8.91429	3.97436	10.9577	15.5154
	8.93884	4.69231	11.0462	15.3154
	8.9634	4.73718	11.05	15.8846
	8.98796	4.14744	10.6769	15.3308
	9.01251	4.28846	11.3346	14.2308
	9.03707	4.4359	11.0961	14.6
	9.06163	4.70513	10.6231	14.7308
	9.08619	4.62179	10.0846	14.1846
	9.11074	4.46154	11.3654	13.9308
	9.1353	4.23077	10.3423	14.9461
	9.15986	4.10256	10.6154	14.0692
	9.18442	4.19872	10.5885	15.2923
	9.20897	4.40385	10.9692	13.9923
	9.23353	4.53205	10.7385	14.8308
	9.25809	3.95513	10.6231	14.4154
	9.28264	4.42308	10.9962	14.4846
	9.3072	4.47436	11.1346	14.2308
	9.33176	4.26282	11.2192	13.4615
	9.35632	4.10897	10.5769	15.3692
	9.38087	4.45513	10.9346	15.0539
	9.40543	4.41026	10.6885	14.0154
	9.42999	4.40385	10.7	15.7615
	9.45455	4.37179	10.7154	14.8615
	9.4791	4.32051	10.4461	13.5308
	9.50366	3.82692	10.8385	14.4846
	9.52822	4.49359	9.82308	15.4692
	9.55277	4.07692	10.1577	15.6692
	9.57733	4.32692	10.4846	14.6077
	9.60189	4.48077	10.8077	14.7769
	9.62645	4.20513	10.7231	14.7538
	9.651	4.58333	10.75	14.8308
	9.67556	4.44231	10.4	13.7538
	9.70012	4.20513	10.2538	14.8385
	9.72468	4.25	11.0346	14.6539
	9.74923	3.99359	9.97308	13.8154
	9.77379	4.08974	10.5539	14.1385
	9.79835	4.05769	10.3423	14.8
	9.8229	3.99359	10.3654	15.1769
	9.84746	4.10256	10.2077	14.2
	9.87202	4.32692	10.4654	13.6385
	9.89658	4.16667	10.7	13.9231
	9.92113	4.4359	10.5346	13.4308
	9.94569	4.5641	9.93077	14.3769
	9.97025	4.30769	10.7885	14.6846
	9.99481	3.89103	10.5154	14.3385
	10.0194	4.23718	10.3769	14.5154
	10.0439	4.08974	10.1692	14.0846
	10.0685	4.62179	10.5885	14.8308
	10.093	4.10256	10.2423	13.7385
	10.1176	4.30769	10.6346	14.9692
	10.1422	4.5	9.44615	15.5539
	10.1667	4.3141	9.87308	14.7385
	10.1913	4.00641	10.7115	13.6077
	10.2158	4.09615	11.0385	13.5154
	10.2404	4.3141	9.87692	14.7462
	10.2649	3.86538	10.7692	14.8769
	10.2895	3.88462	10.5462	13.7385
	10.314	3.87179	10.6846	13.9385
	10.3386	4.32692	10.0192	13.9692
	10.3632	4.1859	9.68846	14.9231
	10.3877	4.27564	10.1961	13.0539
	10.4123	3.97436	10	14
	10.4368	4.03846	9.96154	13.6692
	10.4614	4.09615	9.72692	14.3692
	10.486	3.94872	9.33846	13.7846
	10.5105	4.05769	9.99231	13.6769
	10.5351	4.07692	10.9769	13.6462
	10.5596	3.64744	9.92308	14.0462
	10.5842	4.01282	9.58846	13.4308
	10.6087	3.73077	9.67308	13.5231
	10.6333	3.9359	10.4192	14.1846
	10.6578	4.01923	9.77692	13.4231
	10.6824	4	10.5846	12.9769
	10.707	3.90385	9.49615	13.3308
	10.7315	3.92308	9.94231	13.4538
	10.7561	3.88462	10.0539	13.2231
	10.7806	3.55128	9.25769	14.7846
	10.8052	4.02564	10.3115	14.7923
	10.8298	4.07692	10.2577	14.2308
	10.8543	3.91667	10.1808	13.1923
	10.8789	4.23077	9.64231	14.0769
	10.9034	4.3141	9.85385	14.5769
	10.928	4.04487	10.3231	14.9077
	10.9525	4.44872	9.48846	14.0846
	10.9771	3.80769	9.93462	13.9
	11.0016	3.75	10.1923	13.4538
	11.0262	3.80769	9.52308	13.3923
	11.0508	3.78846	8.82308	12.2538
	11.0753	4.03205	10.0692	13.0923
	11.0999	4.10897	9.67308	13.2077
	11.1244	4.20513	9.9	13.4846
	11.149	4.19872	9.28462	14.0769
	11.1736	4.4359	9.41538	13.9692
	11.1981	3.89744	9.19231	13.7231
	11.2227	4.08974	9.90769	13.3231
	11.2472	3.82692	9.73462	13.4615
	11.2718	4.05769	9.73846	12.8461
	11.2963	3.86538	9.56538	13.1308
	11.3209	3.51282	9.59231	13.9615
	11.3454	3.78846	9.14231	14.0846
	11.37	4.25641	9.38077	14.7308
	11.3946	4.15385	9.46154	13.1077
	11.4191	4.33333	9.13462	13.7385
	11.4437	3.94872	9.64615	14.8154
	11.4682	3.96795	9.47308	13.8846
	11.4928	4.17949	9.28077	13.8154
	11.5174	3.60897	9.46923	13.1154
	11.5419	4.12179	9.01923	13.6308
	11.5665	3.87821	9.74615	13.2538
	11.591	4.10256	9.33846	13.9308
	11.6156	3.99359	9.24615	13.5385
	11.6401	4.10897	9.11538	13.8692
	11.6647	3.78846	9.56154	13.9923
	11.6893	3.90385	9.49615	13.5769
	11.7138	4.16667	9.14231	14.0615
	11.7384	4.10256	8.35385	13.3
	11.7629	4.08974	9.48846	13.5077
	11.7875	4.02564	9.2	13.9385
	11.812	3.76282	9.03462	13.4923
	11.8366	4.13462	9.33846	12.2846
	11.8612	4.12179	8.98077	12.5462
	11.8857	3.67308	9.18462	13.4077
	11.9103	3.86538	9.26154	13.1692
	11.9348	4.07692	9.58462	12.7385
	11.9594	4.04487	9.78462	13.2231
	11.9839	3.96154	9.37692	13.3923
	12.0085	4.13462	8.99231	12.4692
	12.0331	3.69872	9.19615	12.4538
	12.0576	4.07051	9.06923	12.0154
	12.0822	3.82692	9.07308	13.9923
	12.1067	3.64103	9.16538	12.2769
	12.1313	3.66667	9.23077	13.3
	12.1558	3.6859	9.67308	13.1154
	12.1804	3.71154	8.95769	11.7
	12.205	4.07051	9.67692	13.4769
	12.2295	3.96154	9.23846	12.7154
	12.2541	3.80128	9.20385	13.0923
	12.2786	3.82051	8.63846	13.9615
	12.3032	3.88462	8.29231	13.4461
	12.3277	4.17949	9	13.2769
	12.3523	3.96154	8.50769	12.9615
	12.3769	3.98077	8.95	12.5308
	12.4014	4.40385	9.06923	12.2615
	12.426	3.48077	8.45	12.4385
	12.4505	3.66667	9.11923	12.6769
	12.4751	3.26923	9.05769	12.5615
	12.4997	3.70513	9.23846	13.0769
	12.5242	3.80128	9.26154	13.4154
	12.5488	3.73077	8.73077	12.7923
	12.5733	3.73718	8.87692	13.1077
	12.5979	3.46795	8.73846	12.2538
	12.6224	3.94872	9.01538	13.1154
	12.647	3.71154	8.45769	12.8308
	12.6715	3.51923	8.76154	12.8692
	12.6961	3.45513	8.60385	13.5462
	12.7207	3.46154	8.58462	12.9923
	12.7452	3.91667	8.86923	12.4385
	12.7698	3.94231	8.71923	13.1923
	12.7943	3.55128	8.8	13.1462
	12.8189	3.87179	8.53077	13.3461
	12.8435	3.35256	8.43846	12.3461
	12.868	3.72436	8.35	13.6769
	12.8926	3.78205	8.31923	12.7308
	12.9171	3.87179	8.37692	13.4077
	12.9417	3.60897	8.45	12.9923
	12.9662	3.80128	8.34231	13.7154
	12.9908	3.62821	9.00769	13.2615
	13.0153	3.48718	8.68462	12.5231
	13.0399	3.64744	8.66154	12.3923
	13.0645	3.55128	8.73462	13.7
	13.089	3.62179	8.78462	11.7462
	13.1136	3.73077	8.86923	12.3154
	13.1381	3.53846	8.47692	12.8769
	13.1627	3.49359	8.74231	13.2231
	13.1873	3.63462	8.35	11.5769
	13.2118	3.65385	8.98462	11.8308
	13.2364	3.65385	8.65385	12.0462
	13.2609	3.26923	8.15769	12.7
	13.2855	3.53205	8.09615	12.8385
	13.31	3.6859	8.25	11.9
	13.3346	3.36538	8.61538	12.1846
	13.3591	3.75	8.60769	12.6154
	13.3837	3.85256	8.44615	13.2615
	13.4083	4.14103	8.47692	12.7462
	13.4328	3.88462	8.52308	12.2385
	13.4574	3.58974	8.03077	13.2
	13.4819	3.67308	8.48077	12.5077
	13.5065	3.53205	8.55	12.2692
	13.5311	3.64744	9	13
	13.5556	3.30769	7.97308	12.8154
	13.5802	3.27564	8.38077	13.6692
	13.6047	3.20513	8.65769	11.8769
	13.6293	3.58974	8.05	12.3077
	13.6538	3.44231	8.61154	12.4846
	13.6784	3.07692	8.56154	12.0923
	13.7029	3.96795	8.03462	12.3461
	13.7275	3.45513	8.23846	12.4538
	13.7521	3.74359	8.68846	12.0692
	13.7766	3.41026	8.18462	12.7923
	13.8012	3.76923	8.08462	12.8231
	13.8257	3.37821	8.62308	12.0462
	13.8503	3.74359	8.26923	12.2769
	13.8749	3.79487	7.68077	11.8923
	13.8994	3.69231	8.59615	12.5615
	13.924	3.58333	8.15769	12.2
	13.9485	3.45513	8.67308	12.0846
	13.9731	3.99359	8.31923	11.9769
	13.9976	3.62821	7.72692	11.1154
	14.0222	3.16026	8.36923	12.2462
	14.0467	3.59615	8.70385	12.7538
	14.0713	3.10256	8.65	11.1
	14.0959	3.53205	8.95769	12.1539
	14.1204	3.44231	8.99231	11.9615
	14.145	3.74359	8.71538	11.4385
	14.1695	3.5	8.76923	11.4769
	14.1941	3.58333	7.65	11.4385
	14.2187	3.60256	7.68846	12.2538
	14.2432	3.40385	7.83846	13.4308
	14.2678	3.48718	8.08846	11.8
	14.2923	3.41667	8.33077	12.0077
	14.3169	3.53205	7.48462	12.1923
	14.3414	3.0641	8.23077	--
	14.366	3.37821	7.70385	--
	14.3905	3.22436	7.78462	--
	14.4151	3.44231	7.98077	--
	14.4397	3.23077	8.36154	14.3615
	14.4642	2.89744	7.78077	13.5231
	14.4888	2.85897	8.46923	11.4231
	14.5133	3.30769	7.65385	12.1154
	14.5379	3.54487	7.88462	11.9692
	14.5625	3.19872	8.13077	12.5077
	14.587	3.34615	8.08846	13.3
	14.6116	3.53846	7.7	11.5539
	14.6361	3.72436	8.19615	11.9
	14.6607	3.60897	8.10385	12.9846
	14.6852	3.32051	8.28077	12.3385
	14.7098	3.38462	8.32692	11.3538
	14.7344	3.72436	8.2	12.5923
	14.7589	3.44231	7.94231	12.1769
	14.7835	3.4359	7.88462	11.7846
	14.808	3.39744	8.37692	11.8692
	14.8326	3.13462	8.20769	11.6462
	14.8571	3.37821	7.84615	12.9154
	14.8817	3.53205	7.65	12.9846
	14.9063	3.23718	7.66154	11.8615
	14.9308	2.95513	8.33077	11.9692
	14.9554	3.09615	7.53846	12.4077
	14.9799	3.1859	7.55	11.7154
	15.0045	3.4359	7.33462	11.2385
	15.029	3.57692	8.03846	12.3385
	15.0536	3.30128	7.93462	12.5846
	15.0782	3.55128	7.71923	12.0692
	15.1027	3.03205	7.96154	12.8154
	15.1273	3.53846	7.90385	12.2308
	15.1518	3.29487	8.06923	12.5385
	15.1764	3.69872	7.82692	11.5615
	15.2009	3.87179	7.72692	11.3154
	15.2255	3.14103	7.8	11.1923
	15.2501	3.35897	7.51923	12.2615
	15.2746	3.41026	7.53846	12.0615
	15.2992	3.77564	8.00769	12.5
	15.3237	3.62821	7.4	11.6923
	15.3483	3.41667	7.60385	11.2077
	15.3728	3.37179	7.82308	12.0923
	15.3974	3.42308	7.50385	11.3
	15.422	4.01923	8.02692	12.0692
	15.4465	3.41667	8.08077	11.2538
	15.4711	3.5	7.75	12.0077
	15.4956	3.16667	7.94231	12.4
	15.5202	3.4359	7.29615	13.6539
	15.5448	3.29487	8.25385	11.9615
	15.5693	3.34615	8.05769	12.8923
	15.5939	3.65385	7.61923	12.0231
	15.6184	3.32692	7.77308	12.3538
	15.643	3.19231	8.26538	11.0692
	15.6675	3.57692	7.97308	11.4769
	15.6921	3.46154	7.69231	11.6308
	15.7166	3.67949	7.47692	11.5692
	15.7412	3.38462	7.66154	12.1231
	15.7658	3.40385	7.93077	11.4385
	15.7903	3.35256	7.61154	10.9308
	15.8149	3.25641	7.13462	10.9385
	15.8394	3.10256	7.87308	11.9154
	15.864	3.1859	7.57308	12.5769
	15.8886	3.60897	7.77692	12
	15.9131	3.65385	8.21538	11.6539
	15.9377	3.28846	7.53846	12.3385
	15.9622	3.59615	7.56154	11.9769
	15.9868	3.5	7.35769	12.3385
	16.0113	3.50641	7.91923	12.2462
	16.0359	3.14103	6.93077	12.5077
	16.0604	3.44872	7.62308	11.6615
	16.085	3.36538	7.55	11.3769
	16.1096	3.46795	7.01923	11.8308
	16.1341	2.92308	6.89615	12.0692
	16.1587	3.39744	7.38846	11.9077
	16.1832	3.39744	7.76538	12.0539
	16.2078	3.22436	7.45769	12
	16.2324	3.47436	7.44615	11.8385
	16.2569	3.11538	7.50385	11.6154
	16.2815	3.41026	7.53846	11.1231
	16.306	3.15385	7.75385	11.4
	16.3306	3.73077	7.68846	12.0692
	16.3551	3.39103	7.34231	10.7385
	16.3797	3.1859	7.45769	11.0692
	16.4043	3.23077	7.88846	11.7846
	16.4288	3.08333	7.27692	11.1385
	16.4534	3.19872	7.51154	11.5077
	16.4779	3.45513	7.47692	11
	16.5025	3.10256	7.68077	11.0539
	16.527	3.08333	7.26923	12.2615
	16.5516	3.5641	7.42692	11.2538
	16.5761	3.29487	6.96154	11.5462
	16.6007	3.14103	7.80769	11.0692
	16.6253	3.24359	7.68462	11.0077
	16.6498	3.23718	7.32692	12.3077
	16.6744	3.33333	7.35769	11.2
	16.6989	3.42949	6.98846	10.6769
	16.7235	3.28846	7.15385	11.5769
	16.748	3.41667	6.98462	11.4923
	16.7726	3.19231	7.45385	11.5846
	16.7972	3.48718	7.37692	11.4
	16.8217	3.17949	7.46154	11.4615
	16.8463	3.28846	7.20385	11.8923
	16.8708	3.54487	7.64231	11.0539
	16.8954	3.37821	7.30769	10.6692
	16.92	3.5	7.63077	11.2385
	16.9445	3.45513	7.10385	11.7385
	16.9691	3.26923	7.54615	11.2615
	16.9936	2.83974	7.18846	11.0692
	17.0182	3.55769	7.35769	12.5077
	17.0427	3.0641	7.2	10.5769
	17.0673	3.57692	7.93077	11.7538
	17.0919	3.02564	7.55769	11.6385
	17.1164	3.29487	6.96538	11.2462
	17.141	3.30769	7.05385	11.3385
	17.1655	3.40385	7.64231	11.4231
	17.1901	3.20513	6.80769	11.6077
	17.2146	3.12179	7.37308	11.6539
	17.2392	3.0641	7.23846	10.6385
	17.2638	3.23077	6.92692	11.6539
	17.2883	3.1859	7.12692	10.9077
	17.3129	3.44872	7.35	11.4461
	17.3374	3.40385	7.34615	10.7308
	17.362	3.27564	7.34615	11.2769
	17.3865	3.41667	7.04615	9.96923
	17.4111	3.07051	6.97692	10.3538
	17.4357	3.16667	7.50385	11.6769
	17.4602	3.04487	7.25	10.8692
	17.4848	3.44231	7.08462	10.8692
	17.5093	3.33333	6.97308	10.9769
	17.5339	3.14744	7.28077	11.2692
	17.5584	2.96154	7.18462	11.2308
	17.583	3.1859	7.35385	11.5308
	17.6076	3.44231	7.18462	9.59231
	17.6321	2.97436	7.45769	10.9308
	17.6567	3.36538	7.20385	10.1692
	17.6812	3.25641	7.06154	10.7923
	17.7058	3.0641	7.23846	11.1539
	17.7303	3.26923	7.44231	10.7846
	17.7549	3.35256	6.91538	11.1385
	17.7795	3.17308	7.00769	9.8
	17.804	3.60256	7.12692	11.4231
	17.8286	3.14103	7.17692	10.0308
	17.8531	3.3141	6.98846	10.4769
	17.8777	3.48718	7.43846	10.8538
	17.9022	3.52564	7.18077	10.5385
	17.9268	3.21795	6.9	10.7
	17.9514	3.37179	7.45769	10.6539
	17.9759	3.34615	7.01923	9.96923
	18.0005	2.9359	6.90769	10.3769
	18.025	3.0641	6.93462	10.3154
	18.0496	3.33333	6.71154	10.4385
	18.0741	3.26923	6.83077	10.3231
	18.0987	3.32051	6.96923	10.3538
	18.1233	3.03846	6.90385	10.3154
	18.1478	3.3141	7.17308	10.9308
	18.1724	2.86538	7.00769	10.1077
	18.1969	3.62179	6.69615	10.2154
	18.2215	2.98718	6.83077	9.61538
	18.246	2.98077	7.19615	11.2923
	18.2706	3.35256	6.78077	10.5462
	18.2952	2.92949	7.15	10.7154
	18.3197	2.98718	7.58462	10.5923
	18.3443	3.01923	7.16154	11.3308
	18.3688	3.04487	6.57308	10.9923
	18.3934	2.86538	6.92308	10.2769
	18.418	3.01282	6.71923	10.7769
	18.4425	3.14744	6.66538	10.5154
	18.4671	3.14744	6.86538	12.0923
	18.4916	3.12179	6.60385	10.3692
	18.5162	2.78205	6.66538	10.7923
	18.5407	2.87179	7.03462	11.1923
	18.5653	2.75	7.04231	11.1308
	18.5898	3.19872	6.53077	10.6769
	18.6144	2.9359	6.83077	10.4385
	18.639	2.96795	6.78077	10.8308
	18.6635	3.08974	6.70769	10.1846
	18.6881	3.12179	6.98846	10.7
	18.7126	3.12821	6.59615	10.5615
	18.7372	3.12179	6.40769	10.8154
	18.7617	2.98718	6.81923	11.2231
	18.7863	2.8141	6.66923	10.7231
	18.8109	3.02564	6.9	10.8231
	18.8354	3.21154	6.81923	11.5077
	18.86	2.79487	6.95769	10.9
	18.8845	3.16667	6.86923	10.0462
	18.9091	2.69231	7.01538	12.0462
	18.9337	3.0641	6.51154	10.2615
	18.9582	2.85897	6.51538	9.83846
	18.9828	2.85897	6.78846	10.3923
	19.0073	2.80128	6.85	10.7462
	19.0319	2.89744	6.81923	10.7154
	19.0564	2.76923	6.58846	10.1231
	19.081	2.90385	6.34615	9.90769
	19.1056	3.13462	6.73846	10.6
	19.1301	3.27564	6.56538	10.5923
	19.1547	3.12179	6.30769	11.2692
	19.1792	3.00641	6.64231	10.8308
	19.2038	2.92949	6.67692	11.1154
	19.2283	3.27564	6.83077	10.6
	19.2529	2.67949	6.29231	10.9154
	19.2775	2.90385	6.56538	10.4769
	19.302	3.11538	6.73846	10.3692
	19.3266	3.13462	6.49231	9.70769
	19.3511	2.71795	6.68846	11.2385
	19.3757	3.05128	7.16923	10.5846
	19.4002	2.82051	6.61538	11.1539
	19.4248	2.98077	6.74231	9.82308
	19.4493	2.76923	6.49615	9.83846
	19.4739	3.01923	6.57308	10.3461
	19.4985	3.16667	6.66154	9.5
	19.523	2.86538	6.45769	10.1154
	19.5476	3.1859	6.61923	9.99231
	19.5721	2.76282	7.07692	10.2231
	19.5967	2.96795	6.51154	11.5
	19.6212	3.10256	6.62308	10.4615
	19.6458	3.12821	6.53462	11.0462
	19.6704	3.05128	6.38077	10.9538
	19.6949	2.9359	7.11923	11.1769
	19.7195	3.34615	6.51923	10.6692
	19.744	2.97436	6.70769	10.6846
	19.7686	3.05128	6.35	9.87692
	19.7932	2.87821	6.65385	10.1846
	19.8177	3.02564	6.54231	10.2923
	19.8423	3.03846	6.84615	10.9461
	19.8668	2.91026	7.22308	10.5846
	19.8914	2.61538	6.88077	10.4385
	19.9159	2.91026	6.55769	10.7308
	19.9405	3.16667	6.50769	9.71538
	19.9651	3.20513	6.48846	11.2538
	19.9896	3.02564	6.56154	10.8769
	20.0142	3.37179	6.36923	11.6539
	20.0387	3.08333	6.71538	11
	20.0633	2.85897	6.46538	11.0769
	20.0878	2.92949	6.67692	9.66923
	20.1124	2.9359	6.75	9.66154
	20.1369	2.87821	6.35385	10.3692
	20.1615	2.85897	6.59615	9.83846
	20.1861	2.73077	6.34615	10.4846
	20.2106	2.89744	6.29615	9.99231
	20.2352	3.26282	6.75385	9.83077
	20.2597	3.04487	6.88077	10.0462
	20.2843	2.66667	5.98462	8.95385
	20.3088	3.14744	6.36538	10.0769
	20.3334	3.17949	6.4	9.63846
	20.358	3.13462	6.27692	10.8308
	20.3825	2.98077	6.42308	10.0154
	20.4071	2.94872	6.25	10.6846
	20.4316	3.25	6.58846	9.87692
	20.4562	2.98718	6.67692	10.0539
	20.4808	3.10256	6.23846	10.0462
	20.5053	3.29487	6.35385	10.4461
	20.5299	2.64744	6.61538	9.17692
	20.5544	3.33333	6.01923	9.66923
	20.579	2.91667	6.54615	11.0154
	20.6035	2.79487	5.93846	9.53846
	20.6281	2.91667	6.42308	10.4385
	20.6527	2.98077	6.51154	9.73846
	20.6772	2.83974	6.24231	10.3846
	20.7018	3.19231	6.50769	10
	20.7263	2.78205	6.50385	10.3077
	20.7509	2.82051	6.23462	10.7385
	20.7754	3.00641	6.53462	9.19231
	20.8	2.89744	6.47308	10.6692
	20.8246	2.80128	6.47692	10.2308
	20.8491	2.94872	6.28077	9.12308
	20.8737	2.85256	6.63846	9.87692
	20.8982	2.73077	6.51923	10.0769
	20.9228	3.07692	6.57308	9.53846
	20.9473	2.87821	6.21538	10.2154
	20.9719	2.94872	6.27308	9.88462
	20.9965	2.83333	6.69231	10.3923
	21.021	3.15385	6.88077	10.6385
	21.0456	2.80128	6.46154	9.96923
	21.0701	2.9359	6.67692	10.1692
	21.0947	2.92308	6.42692	10.6692
	21.1192	2.89103	6.20385	9.67692
	21.1438	2.92308	6.37308	9.27692
	21.1684	2.84615	6.12308	9.73846
	21.1929	2.85897	6.14231	9.45385
	21.2175	2.80128	6.12308	9.43077
	21.242	2.71795	6.29615	10.1231
	21.2666	2.53205	6.61538	10.0539
	21.2911	3.04487	6.25	10.2462
	21.3157	2.83974	6	10.1539
	21.3403	2.80128	6.48462	10.2154
	21.3648	2.85897	6.34615	9.58462
	21.3894	3.00641	5.92308	9.93846
	21.4139	2.77564	6.26154	10.2769
	21.4385	2.69231	5.97692	10.2615
	21.463	2.82692	5.97692	9.56154
	21.4876	2.66667	6.4	9.96923
	21.5122	2.60256	6.41154	10.0308
	21.5367	2.53846	6.06154	8.86923
	21.5613	2.78846	6.11154	9.7
	21.5858	3.01282	6.21538	9.5
	21.6104	2.94872	6.32308	9.37692
	21.6349	2.86538	5.91154	9.73846
	21.6595	3.16026	6.07692	10.7462
	21.6841	2.84615	5.78846	10.7077
	21.7086	2.89744	6.23077	9.76923
	21.7332	3.07051	6.13462	9.28462
	21.7577	2.44872	6.29327	9.83077
	21.7823	2.67308	6.45192	10.0154
	21.8069	2.91026	6.43269	10.3385
	21.8314	2.74359	6.00962	10.3923
	21.856	3.1859	6.41827	9.94615
	21.8805	2.70513	6.09135	9.03846
	21.9051	2.61538	5.96635	10.1154
	21.9296	2.65385	6.12981	9.73077
	21.9542	2.92949	5.75962	9.88462
	21.9788	2.80128	6.01923	9.76154
	22.0033	2.70513	6.4375	10.3385
	22.0279	2.74359	6.28365	10.5
	22.0524	2.80769	5.83654	9.93077
	22.077	2.98718	6.19712	9.96154
	22.1015	2.80769	6.28365	10.1769
	22.1261	2.73077	6.90865	9.84615
	22.1506	2.8141	6.01442	10.1231
	22.1752	2.78846	6.14423	10.5231
	22.1998	2.63462	6.06731	9.66154
	22.2243	2.62821	6.20673	10.3231
	22.2489	2.87821	6.18269	10.1692
	22.2734	3.03205	5.83654	10.4846
	22.298	2.79487	6.125	9.32308
	22.3225	2.5641	6.04808	10.0308
	22.3471	2.57051	5.95192	9.78462
	22.3717	2.66667	6.40385	9.80769
	22.3962	2.64103	6.14423	9.98462
	22.4208	2.34615	6.15385	9.89231
	22.4453	2.74359	5.9375	10.5231
	22.4699	2.60897	6.9375	10.0615
	22.4945	2.60897	6.14904	9.53846
	22.519	2.47436	6.46154	10.7692
	22.5436	2.87179	6.30288	9.32308
	22.5681	2.78846	6.33173	8.18462
	22.5927	2.65385	6.48558	9.83654
	22.6172	2.83333	6.03846	9.22115
	22.6418	3.01923	6.54808	9.43269
	22.6664	2.95513	6.19231	9.69231
	22.6909	2.53205	5.47596	9.57692
	22.7155	2.83654	5.64423	9.03846
	22.74	2.875	6.08654	9.54808
	22.7646	2.77885	6.0625	9.38462
	22.7891	2.72115	5.86058	9.14423
	22.8137	2.75962	6.08654	9.67308
	22.8382	2.71154	5.5	9.67308
	22.8628	2.99038	6.03846	9.76923
	22.8874	3.04808	5.90385	9.52885
	22.9119	2.64423	6.25962	9.85577
	22.9365	2.99038	6.03846	9.72115
	22.961	2.52885	6	10.2885
	22.9856	2.82692	5.88462	9.93269
	23.0101	2.79808	5.78365	10.4327
	23.0347	2.78846	5.8125	8.61538
	23.0593	3.10577	5.65865	9.33654
	23.0838	2.75	6.0625	9.67308
	23.1084	2.64423	6.125	9.26923
	23.1329	2.82692	5.94231	9.31731
	23.1575	2.53846	6.04808	10.0289
	23.1821	2.98077	6	8.99038
	23.2066	2.63462	6.05769	9.25
	23.2312	2.77885	6.34615	9.18269
	23.2557	2.60577	5.79808	9.17308
	23.2803	3.01923	5.96154	9.57692
	23.3048	2.66346	5.93269	9.14423
	23.3294	2.56731	5.52885	9.46154
	23.354	2.68269	5.72596	9.00962
	23.3785	3.00962	5.5625	9.39423
	23.4031	2.36538	5.70673	9.27885
	23.4276	2.65385	7.69231	8.91346
	23.4522	2.69231	5.85577	10.0577
	23.4767	2.58654	7.42788	8.78846
	23.5013	2.48077	7.45673	9.64423
	23.5259	2.76923	7.42308	8.47115
	23.5504	2.83654	5.8125	8.83654
	23.575	2.71154	5.99038	9.16346
	23.5995	2.84615	5.96154	9.67308
	23.6241	3.05769	6.03365	9.46154
	23.6486	2.84615	6.13462	9.47115
	23.6732	2.64423	5.96635	8.15385
	23.6978	2.73077	5.78846	8.91346
	23.7223	2.64423	5.56731	8.48077
	23.7469	3.01923	5.88942	8.70192
	23.7714	3.22115	5.73077	8.55769
	23.796	2.70192	5.65865	9.54808
	23.8205	2.75	5.53365	8.91346
	23.8451	2.95192	5.70673	9.50962
	23.8697	2.76923	5.64423	8.76923
	23.8942	3.07692	5.55288	8.64423
	23.9188	2.99038	6.05288	9.25
	23.9433	2.71154	6.26442	9.42308
	23.9679	2.71154	5.5	8.67308
	23.9924	2.65385	5.64423	8.78846
	24.017	2.57692	5.83173	10.2789
	24.0416	2.68269	5.91827	9.89423
	24.0661	3.01923	5.28365	9.14423
	24.0907	2.69231	6.02885	9.44231
	24.1152	2.68269	5.34615	10.2115
	24.1398	2.73077	5.82692	9.13462
	24.1643	2.56731	5.45192	9.14423
	24.1889	3.73077	5.74038	8.86538
	24.2135	3.84615	6.52885	9.23077
	24.238	2.57692	6.11538	9.06731
	24.2626	2.78846	5.58654	8.70192
	24.2871	2.70192	5.33654	8.30769
	24.3117	2.29808	5.89904	8.36538
	24.3362	5.78846	5.67308	7.89423
	24.3608	2.75	6.02885	9.375
	24.3854	3.47115	5.89904	8.52885
	24.4099	3.22115	5.91346	8.75
	24.4345	2.89423	3.98558	8.125
	24.459	2.66346	4.9359	8.17308
	24.4836	2.43269	5.05769	9.63462
	24.5082	3.23077	5.02564	9.30769
	24.5327	2.57692	5.5641	9.04808
	24.5573	3.14423	5.22436	8.90385
	24.5818	2.97115	5.11538	8.17308
	24.6064	2.98077	5.40385	8.97115
	24.6309	2.68269	5.09615	9.83654
	24.6555	2.75	5.33974	9.36538
	24.6801	2.48077	5.33974	8.60577
	24.7046	2.81731	5.71154	8.55769
	24.7292	3.26923	4.92308	9.14423
	24.7537	2.63462	5.1859	8.84615
	24.7783	2.66346	5.25641	8.60577
	24.8028	2.72115	5.72436	9.00962
	24.8274	2.59615	4.82051	8.50962
	24.8519	2.41346	4.8141	8.96154
	24.8765	2.89423	5.08974	9
	24.9011	2.60577	5.0641	9.00962
	24.9256	2.44231	5.29487	8.09615
	24.9502	2.74038	5.1859	8.74038
	24.9747	2.98077	5.16026	8.11538
	24.9993	2.57692	5.27564	9.71154
	25.0238	2.45192	4.64103	9.70192
	25.0484	2.59615	4.69872	9.26923
	25.073	2.73077	5	8.74038
	25.0975	2.33654	4.73718	8.96154
	25.1221	2.5	5.01282	9.11538
	25.1466	2.67308	4.94872	8.19231
	25.1712	2.72115	4.57051	8.55769
	25.1958	2.75962	4.92949	8.04808
	25.2203	2.51923	5.21795	9.61538
	25.2449	2.64423	4.76923	8.67308
	25.2694	2.98077	5.1859	8.18269
	25.294	2.43269	5.16026	9.17308
	25.3185	2.63462	4.96795	9.25962
	25.3431	2.53846	4.67949	9.70192
	25.3677	2.54808	4.74359	8.74038
	25.3922	2.84615	5.96795	9.42308
	25.4168	2.28846	4.73718	9.19231
	25.4413	2.875	4.99359	8.55769
	25.4659	2.56731	5.01282	9.63462
	25.4904	2.55769	4.87821	8.89423
	25.515	2.50962	4.80769	8.36538
	25.5395	2.31731	4.9359	8.78846
	25.5641	3.06731	4.69231	9.73077
	25.5887	2.41346	5.14103	8.875
	25.6132	2.49038	4.85256	8.33654
	25.6378	2.30769	5.24359	9.51923
	25.6623	2.59615	5.12179	8.23077
	25.6869	2.44231	4.88462	8.80769
	25.7114	2.57692	4.73077	9.05769
	25.736	2.05769	5.3141	9.60577
	25.7606	2.40385	4.84615	8.82692
	25.7851	2.90385	5.14103	8.08654
	25.8097	2.63462	5.11538	10.25
	25.8342	2.59615	4.62179	8.90385
	25.8588	2.59615	4.82692	8.80769
	25.8834	3	4.91026	9.26923
	25.9079	2.40385	5	8.625
	25.9325	2.42308	4.48077	8.98077
	25.957	2.26923	5.20513	8.30769
	25.9816	3.65385	5.28846	8.96154
	26.0061	2.84615	4.94231	8.89423
	26.0307	3.09615	4.60897	8.125
	26.0553	2.73077	4.8141	9.18269
	26.0798	2.5	5.08974	9.26923
	26.1044	2.40385	4.61538	7.97115
	26.1289	2.84615	4.62179	8.625
	26.1535	2.76923	4.94872	8.69231
	26.178	3.21154	5.26923	8.83654
	26.2026	2.46154	4.65385	9.05769
	26.2272	3.05769	5.05128	9.58654
	26.2517	2.59615	4.88462	9.05769
	26.2763	2.84615	4.86538	8.69231
	26.3008	2.32692	5.12821	9.14423
	26.3254	2.75	4.74359	9.78846
	26.3499	2.82692	5.16667	9.51923
	26.3745	2.42308	4.49359	8.58654
	26.3991	2.42308	4.67308	8.23077
	26.4236	2.42308	5.39744	9.41346
	26.4482	2.40385	4.70513	9.70192
	26.4727	2.65385	5.02564	8.91346
	26.4973	2.28846	4.67308	8.60577
	26.5218	2.38462	4.57051	8.25962
	26.5464	2.73077	4.55128	8.34615
	26.571	2.69231	4.48718	8.90385
	26.5955	2.55769	4.55769	9.40385
	26.6201	2.84615	5.29487	8.77885
	26.6446	2.46154	4.66026	9.16346
	26.6692	2.38462	4.63462	8.99038
	26.6937	3.26923	5.12821	8.26923
	26.7183	2.05769	4.83974	9.56731
	26.7429	2.51923	5.23718	8.57692
	26.7674	2.63462	4.58974	9.35577
	26.792	2.15385	5.38462	8.79808
	26.8165	2.69231	4.91026	8.63462
	26.8411	2.57692	4.71795	9.21154
	26.8656	2.34615	5.02564	9.15385
	26.8902	2.46154	4.79487	9.21154
	26.9148	2.23077	4.92308	8.40385
	26.9393	2.92308	4.80128	8.30769
	26.9639	2.51923	4.39103	8.50962
	26.9884	2.82692	4.91667	8.58654
	27.013	2.42308	4.88462	9.52885
	27.0375	2.46154	4.45513	7.33654
	27.0621	2.21154	4.34615	8.50962
	27.0867	2.59615	4.67949	8.04808
	27.1112	2.67308	4.82051	8.26923
	27.1358	2.67308	4.32692	7.93269
	27.1603	2.40385	4.4359	8.07692
	27.1849	2.69231	4.46795	8.47115
	27.2094	2.82692	4.83974	8.63462
	27.234	2.63462	4.79487	8.47115
	27.2586	2	4.96795	8.15385
	27.2831	2.5	4.77564	9.44231
	27.3077	2.73077	4.33974	8.52885
	27.3322	2.48077	4.96795	9.10577
	27.3568	2.71154	4.75641	8.47115
	27.3814	3.03846	4.38462	9.25962
	27.4059	2.40385	4.30769	9
	27.4305	2.23077	5	8.26923
	27.455	2.19231	4.95513	7.98077
	27.4796	2.23077	4.61538	7.93269
	27.5041	2.69231	4.79487	8.80769
	27.5287	2.69231	4.67308	8.83654
	27.5532	2.38462	4.60256	9.70192
	27.5778	2.55769	4.28846	8.75962
	27.6024	2.78846	4.96795	8.63462
	27.6269	2.55769	4.52564	9.53846
	27.6515	2.65385	4.32692	8.43269
	27.676	2.48077	4.35897	9.29808
	27.7006	2.15385	4.89744	9.38462
	27.7251	2.13462	4.26282	8.33654
	27.7497	2.82692	4.53205	8.80769
	27.7743	2.5	4.92949	8.76923
	27.7988	2.23077	4.14744	8.5
	27.8234	2.05769	4.73077	8.55769
	27.8479	2.94231	4.55769	8.10577
	27.8725	1.67308	4.88462	7.96154
	27.8971	1.80769	4.66026	8.04808
	27.9216	2.05769	4.62821	8.47115
	27.9462	2.75	4.45513	8.625
	27.9707	2.67308	4.53846	8.90385
	27.9953	2.03846	4.6859	8.42308
	28.0198	2.03846	4.75	8.48077
	28.0444	2.71154	4.75641	8.97115
	28.069	2.82692	5.00641	8.44231
	28.0935	2.71154	4.83333	7.98077
	28.1181	2.69231	4.5	9.68269
	28.1426	2.42308	4.28205	8.32692
	28.1672	2.17308	4.37179	8.66346
	28.1917	2.78846	4.59615	8.34615
	28.2163	2.51923	4.62179	8.29808
	28.2408	2.40385	4.86538	8.31731
	28.2654	2.42308	4.70513	9.46154
	28.29	2.78846	4.89744	8.68269
	28.3145	2.69231	4.46795	8.82692
	28.3391	2.32692	4.67308	8.83654
	28.3636	2.42308	4.33333	9.29808
	28.3882	3.05769	4.49359	8.07692
	28.4127	2.78846	4.6859	8.75
	28.4373	2.51923	4.58974	8.72115
	28.4619	2.53846	4.33974	8.75
	28.4864	2.38462	4.22436	8.38462
	28.511	2.67308	4.60897	8.50962
	28.5355	2.76923	3.83333	8.41346
	28.5601	2.11538	4.39744	9.38462
	28.5846	2.71154	4.73077	9.03846
	28.6092	2.17308	4.69872	9.42308
	28.6338	2.67308	5.08333	8.09615
	28.6583	2.76923	4.85897	8.77885
	28.6829	2.36538	4.4359	8.66346
	28.7074	2.82692	4.22436	9.13462
	28.732	2.94231	4.57051	9.50962
	28.7566	2.63462	4.48077	9.33654
	28.7811	2.40385	4.3141	8.45192
	28.8057	2.92308	4.83333	8.77885
	28.8302	2.59615	4.77564	8.73077
	28.8548	2.55769	4.69872	8.73077
	28.8793	2.75	4.26923	8.38462
	28.9039	2.03846	4.3141	7.70192
	28.9285	2.51923	4.55128	8.49038
	28.953	2.67308	4.76282	8.42308
	28.9776	2.34615	4.6859	8.02885
	29.0021	2.38462	4.71795	9.97115
	29.0267	2.23077	4.40385	8.44231
	29.0512	2.5	4.65385	8.94231
	29.0758	2.67308	4.23077	8.61538
	29.1003	2.34615	4.65385	8.27885
	29.1249	2.63462	4.76923	7.69231
	29.1495	2.90385	4.38462	9.34615
	29.174	2.26923	4.48718	8.625
	29.1986	2.88462	4.75	8.375
	29.2231	2.65385	4.55769	8.23077
	29.2477	2.44231	4.22436	8.25
	29.2722	2.84615	3.58333	8.71154
	29.2968	2.11538	4.07692	9.03846
	29.3214	2.19231	4.46154	7.78846
	29.3459	2.11538	4.33654	8.23077
	29.3705	2.69231	4.14423	8.77885
	29.395	2.17308	3.66346	8.34615
	29.4196	2.59615	4.43269	7.72115
	29.4442	2.30769	4.07692	8.27885
	29.4687	2.15385	4.18269	7.98077
	29.4933	2.32692	4.375	9.48077
	29.5178	3.03846	4.51923	7.80769
	29.5424	2.59615	4.94231	8.01923
	29.5669	2.73077	4.43269	7.29808
	29.5915	2.11538	4.48077	8.47115
	29.6161	2.13462	4.41346	8.15385
	29.6406	2.73077	4.49038	8.51923
	29.6652	2.13462	4.61538	8.94231
	29.6897	2.63462	4.44231	8.06731
	29.7143	2.51923	4.10577	8.16346
	29.7388	2.53846	4.27885	8.40385
	29.7634	2.26923	4.20192	7.75
	29.788	2.46154	4.56731	8.41346
	29.8125	1.38462	3.65385	7.94231
	29.8371	2.53846	4.44231	7.66346
	29.8616	1.92308	4.27885	8.43269
	29.8862	2.57692	4.63462	7.48077
	29.9107	2.19231	4.77885	8.30769
	29.9353	2.15385	4.44231	8.14423
	29.9599	2.19231	4.77885	7.64423
	29.9844	2.38462	4.18269	8.10577
	30.009	2.23077	4.63462	9.22115
