# Supplementary material for: CTP promotes efficient ParB-dependent DNA condensation by facilitating one-dimensional diffusion from parS
Source: eLife. 2021 Jul 12;10:e67554. doi: 10.7554/eLife.67554 (PMC8299390; doi:10.7554/eLife.67554)
Supplement: Figure 1—source data 1. [file elife-67554-fig1-data1.xlsx]

## Sheet: Figure1
Figure 1 E								Figure 1F
	No CTP		CTP		CTPgS
	Position (um)	Photons	Position (um)	Photons	Position (um)	Photons
	1.00119	23.2	0.90119	11.2	0.75119	20		No CTP	10.0897	0.5409
	1.10131	22.8	1.00131	12	0.85131	19.6		+CTP	31.5539	3.49413
	1.20143	20.2	1.10143	11.8	0.95143	16.8		+CTPgS	32.6692	3.11454
	1.30155	20	1.20155	15.8	1.05155	16.2
	1.40167	16.8	1.30167	11.2	1.15167	14.4
	1.50178	17.4	1.40178	12	1.25178	16
	1.6019	17	1.5019	9.8	1.3519	14.8
	1.70202	15.8	1.60202	9.2	1.45202	16.6
	1.80214	15.4	1.70214	11.8	1.55214	13.6
	1.90226	14	1.80226	9.8	1.65226	14.2
	2.00238	14.8	1.90238	8.8	1.75238	13
	2.1025	16	2.0025	8.6	1.8525	9.2
	2.20262	17	2.10262	11.4	1.95262	11
	2.30274	13.8	2.20274	8.8	2.05274	9.2
	2.40285	13.4	2.30285	9	2.15285	10.8
	2.50297	16.6	2.40297	6.4	2.25297	11.4
	2.60309	11.8	2.50309	6.8	2.35309	12.6
	2.70321	13.6	2.60321	7.2	2.45321	14.6
	2.80333	13.4	2.70333	6.8	2.55333	8.2
	2.90345	9.4	2.80345	7	2.65345	12.6
	3.00357	10	2.90357	5.2	2.75357	8
	3.10369	10	3.00369	7.4	2.85369	11.6
	3.20381	12	3.10381	6	2.95381	10.2
	3.30393	10.2	3.20393	7.4	3.05393	11.2
	3.40404	11.4	3.30404	7.8	3.15404	12
	3.50416	12.6	3.40416	6.8	3.25416	12.2
	3.60428	13.4	3.50428	6.2	3.35428	11.8
	3.7044	9.6	3.6044	4.8	3.4544	9.4
	3.80452	12.2	3.70452	5.4	3.55452	11.8
	3.90464	11	3.80464	8.6	3.65464	12.8
	4.00476	14.6	3.90476	7.4	3.75476	11.8
	4.10488	15	4.00488	6.2	3.85488	11.4
	4.205	12.4	4.105	6.2	3.955	14
	4.30512	14.2	4.20512	8.2	4.05512	15.8
	4.40523	13.4	4.30523	8.2	4.15523	9.8
	4.50535	15.2	4.40535	10.6	4.25535	13
	4.60547	16.6	4.50547	8.8	4.35547	12.2
	4.70559	14	4.60559	8.6	4.45559	13.6
	4.80571	12	4.70571	9	4.55571	13.8
	4.90583	13.2	4.80583	10.2	4.65583	17.6
	5.00595	15.8	4.90595	8.8	4.75595	16.6
	5.10607	18.4	5.00607	12.4	4.85607	18.6
	5.20619	20.8	5.10619	10.8	4.95619	20.6
	5.3063	22.8	5.2063	11.6	5.0563	18.8
	5.40642	21	5.30642	10.6	5.15642	22.6
	5.50654	21.2	5.40654	12	5.25654	19.2
	5.60666	24	5.50666	13	5.35666	23.4
	5.70678	20.8	5.60678	9.6	5.45678	20.6
	5.8069	19.6	5.7069	11.4	5.5569	18
	5.90702	16.6	5.80702	8.4	5.65702	13.6
	6.00714	13.2	5.90714	6.8	5.75714	10.4
	6.10726	6.2	6.00726	5.6	5.85726	9.2
	6.20738	5.6	6.10738	4.8	5.95738	8.4
	6.30749	3.6	6.20749	5.4	6.05749	10.6
	6.40761	5.2	6.30761	6.8	6.15761	6
	6.50773	3.2	6.40773	5	6.25773	6.4
	6.60785	3.2	6.50785	4.6	6.35785	6.8
	6.70797	3	6.60797	6	6.45797	8.2
	6.80809	4	6.70809	4.6	6.55809	5.4
	6.90821	4.2	6.80821	6.2	6.65821	5.6
	7.00833	1.8	6.90833	4.2	6.75833	6
	7.10845	2.2	7.00845	5.4	6.85845	5.4
	7.20856	2.8	7.10856	6.4	6.95856	5
	7.30868	2	7.20868	6	7.05868	6.4
	7.4088	2.4	7.3088	4.4	7.1588	8.4
	7.50892	3	7.40892	3.6	7.25892	4.4
	7.60904	4	7.50904	5	7.35904	7.6
	7.70916	2.4	7.60916	5.6	7.45916	6
	7.80928	2	7.70928	5	7.55928	6.2
	7.9094	2.6	7.8094	5	7.6594	7.2
	8.00952	3.2	7.90952	5.4	7.75952	6.2
	8.10964	2.2	8.00964	5.8	7.85964	4.8
	8.20975	3.2	8.10975	7.6	7.95975	4.8
	8.30987	3.8	8.20987	6.2	8.05987	5.8
	8.40999	1.8	8.30999	6.6	8.15999	5.6
	8.51011	2	8.41011	8.2	8.26011	4.6
	8.61023	4.2	8.51023	6	8.36023	6.6
	8.71035	4.4	8.61035	13.8	8.46035	6.4
	8.81047	3.4	8.71047	15.2	8.56047	7.6
	8.91059	3.2	8.81059	15	8.66059	9.6
	9.01071	5.2	8.91071	19	8.76071	13.8
	9.11082	4.8	9.01082	18	8.86082	15.4
	9.21094	6.6	9.11094	21	8.96094	15
	9.31106	5.4	9.21106	15.6	9.06106	18.8
	9.41118	3.4	9.31118	11.4	9.16118	18
	9.5113	2.2	9.4113	11.2	9.2613	14
	9.61142	2.6	9.51142	7.8	9.36142	13.4
	9.71154	3.4	9.61154	8	9.46154	12.6
	9.81166	2.6	9.71166	12.6	9.56166	10.2
	9.91178	5.4	9.81178	14	9.66178	8.8
	10.0119	6.8	9.9119	14.2	9.7619	14.2
	10.112	5.4	10.012	12.4	9.86201	12.4
	10.2121	5.4	10.1121	12	9.96213	11.4
	10.3123	6.2	10.2122	8	10.0623	13.4
	10.4124	6	10.3124	14.2	10.1624	12.8
	10.5125	5.6	10.4125	17	10.2625	10.2
	10.6126	8.4	10.5126	14.4	10.3626	12.8
	10.7127	6.2	10.6127	14.8	10.4627	17
	10.8128	5.8	10.7128	12.2	10.5628	19.8
	10.913	5.4	10.813	13.4	10.663	20.6
	11.0131	5.2	10.9131	12	10.7631	15.2
	11.1132	4.6	11.0132	12.8	10.8632	15.6
	11.2133	2.8	11.1133	8.8	10.9633	10.8
	11.3134	3	11.2134	5	11.0634	15
	11.4136	2.8	11.3136	3.8	11.1636	8.8
	11.5137	2.8	11.4137	6.6	11.2637	6
	11.6138	1.4	11.5138	5.2	11.3638	7.4
	11.7139	3.8	11.6139	3.8	11.4639	4.6
	11.814	3	11.714	2.8	11.564	5.8
	11.9142	2.8	11.8142	2.8	11.6642	7.2
	12.0143	4.2	11.9143	6	11.7643	6
	12.1144	3.6	12.0144	3.6	11.8644	4.4
	12.2145	3.4	12.1145	2.2	11.9645	5.4
	12.3146	3.2	12.2146	3.6	12.0646	3.6
	12.4147	4	12.3148	4	12.1647	5.4
	12.5149	3.4	12.4149	5	12.2649	6
	12.615	2.4	12.515	4.2	12.365	6.2
	12.7151	2.8	12.6151	1.4	12.4651	9.4
	12.8152	4.4	12.7152	4.2	12.5652	6
	12.9154	4.4	12.8154	4.4	12.6654	9.2
	13.0155	3.8	12.9155	4	12.7655	5.8
	13.1156	3.6	13.0156	3.8	12.8656	8.2
	13.2157	5	13.1157	2.8	12.9657	6.2
	13.3158	3	13.2158	4.2	13.0658	6
	13.4159	5.8	13.3159	4.2	13.1659	7.6
	13.5161	8.6	13.4161	6	13.2661	6.6
	13.6162	9.2	13.5162	4.2	13.3662	6.8
	13.7163	18.2	13.6163	7.8	13.4663	4.8
	13.8164	31.4	13.7164	9.2	13.5664	6.6
	13.9165	31.6	13.8165	18.4	13.6665	8.4
	14.0167	31	13.9167	13.4	13.7667	12.2
	14.1168	24.8	14.0168	15	13.8668	15.8
	14.2169	23.2	14.1169	11	13.9669	18.8
	14.317	19.4	14.217	8.4	14.067	14.6
	14.4171	22.2	14.3171	12.2	14.1671	13.6
	14.5173	20.2	14.4172	10.2	14.2673	17.4
	14.6174	14.8	14.5174	8.2	14.3674	15.8
	14.7175	17.6	14.6175	10.4	14.4675	14.4
	14.8176	15.4	14.7176	8	14.5676	15
	14.9177	15.6	14.8177	8.4	14.6677	12.6
	15.0178	15.6	14.9178	8.8	14.7678	11.8
	15.118	14.8	15.018	7.6	14.868	12.2
	15.2181	15.4	15.1181	7.2	14.9681	9.6
	15.3182	15.6	15.2182	9.4	15.0682	11.4
	15.4183	16.8	15.3183	9.2	15.1683	10.6
	15.5184	10	15.4184	7.6	15.2684	9.2
	15.6186	12.8	15.5186	9.2	15.3686	12.6
	15.7187	12.6	15.6187	10.2	15.4687	10.6
	15.8188	15	15.7188	8.2	15.5688	10
	15.9189	14.2	15.8189	7.4	15.6689	9.4
	16.019	10.2	15.919	8	15.769	10
	16.1192	11	16.0191	10.2	15.8691	11.8
	16.2193	11	16.1193	7.8	15.9693	14.2
	16.3194	13.8	16.2194	6.2	16.0694	5.8
	16.4195	12	16.3195	7.8	16.1695	10.6
	16.5196	10.6	16.4196	8.8	16.2696	10.6
	16.6197	14.4	16.5197	9.4	16.3697	13
	16.7199	13.8	16.6199	10	16.4699	9.2
	16.82	16.2	16.72	6.8	16.57	8
	16.9201	13.4	16.8201	8	16.6701	11.2
	17.0202	13.6	16.9202	8.2	16.7702	11.8
	17.1203	12.8	17.0203	7.2	16.8703	8.4
	17.2205	14.4	17.1205	8.2	16.9705	10.4
	17.3206	15.2	17.2206	9.4	17.0706	8.4
	17.4207	14.2	17.3207	5	17.1707	10.4
	17.5208	14.6	17.4208	8.2	17.2708	8.8
	17.6209	14.2	17.5209	8.2	17.3709	12.6
	17.7211	15.6	17.6211	9.8	17.4711	9
	17.8212	19.8	17.7212	10.6	17.5712	12.2
	17.9213	18.6	17.8213	10.6	17.6713	14.6
	18.0214	23.8	17.9214	10.4	17.7714	16
	18.1215	19	18.0215	12.4	17.8715	16.2
	18.2217	26	18.1216	10.6	17.9717	13.8
	18.3218	22.2	18.2218	9.8	18.0718	17.4
	18.4219	25	18.3219	10.4	18.1719	17.8
	18.522	22	18.422	10.6	18.272	14.6
	18.6221	23.8	18.5221	10.8	18.3721	18.2
	18.7222	19	18.6222	8.6	18.4722	16.2
	18.8224	12.6	18.7224	4.6	18.5724	16.4
	18.9225	6.8	18.8225	5.8	18.6725	11.8
	19.0226	6.6	18.9226	4.8	18.7726	11.6
	19.1227	4	19.0227	3.8	18.8727	10.4
	19.2228	4.6	19.1228	5.4	18.9728	6
	19.323	2.8	19.223	5.6	19.073	6.8
	19.4231	3.6	19.3231	5.6	19.1731	6
	19.5232	4	19.4232	4.6	19.2732	6.8
	19.6233	5	19.5233	3.6	19.3733	4.2
	19.7234	3.6	19.6234	4.4	19.4734	5.8
	19.8236	3	19.7235	5	19.5736	6.4
	19.9237	2.4	19.8237	2.4	19.6737	6.8
	20.0238	1.2	19.9238	5.4	19.7738	6
