# Supplementary material for: CTP promotes efficient ParB-dependent DNA condensation by facilitating one-dimensional diffusion from parS
Source: eLife. 2021 Jul 12;10:e67554. doi: 10.7554/eLife.67554 (PMC8299390; doi:10.7554/eLife.67554)
Supplement: Figure 2—source data 1. [file elife-67554-fig2-data1.xlsx]

## Sheet: Figure2
Figure 2C										Figure 2G
			No CTP			CTP		CTPgS			CTP
	Lambda				Background							Background
	Position (um)	Photons	Position (um)	Photons	Photons	Position (um)	Photons	Position (um)	Photons		Position (um)	Photons	Photons
	0	3.8	-0.2	27.4	39.2	0	31.6	0.25	25.4		0	13	14.8
	0.09986	3.2	-0.10014	28.6	34.4	0.09986	35.4	0.34986	29.2		0.09986	14.6	10.4
	0.19971	3.8	-0.00028777	30.6	36	0.19971	36.4	0.44971	27.8		0.19971	13.4	12
	0.29957	2.6	0.09957	28.2	36.8	0.29957	47.4	0.54957	27.2		0.29957	13.2	14.2
	0.39942	5.4	0.19942	36.6	40.8	0.39942	44.6	0.64942	28.4		0.39942	14.4	12
	0.49928	5.2	0.29928	30	36.4	0.49928	65.2	0.74928	44.8		0.49928	11.6	10.6
	0.59914	6.4	0.39914	33.2	48.4	0.59914	80.4	0.84914	63		0.59914	17.2	12.8
	0.69899	3.8	0.49899	46.2	58.2	0.69899	104.4	0.94899	76.6		0.69899	11.8	12.4
	0.79885	4	0.59885	64.2	96	0.79885	112.4	1.04885	99.2		0.79885	13	15.6
	0.89871	4.4	0.69871	117	164.6	0.89871	107.6	1.14871	115.8		0.89871	15	13.4
	0.99856	8.2	0.79856	169	222.6	0.99856	106.6	1.24856	108.8		0.99856	14.2	13
	1.09842	8.8	0.89842	238.6	263.4	1.09842	97	1.34842	116.6		1.09842	15.6	12.2
	1.19827	12.6	0.99827	257.2	254.8	1.19827	102.6	1.44827	100.8		1.19827	15	12
	1.29813	14.4	1.09813	256.8	258.8	1.29813	101.2	1.54813	100.6		1.29813	11.2	15.2
	1.39799	13.6	1.19799	251.4	242	1.39799	90.4	1.64799	85.8		1.39799	13	12.6
	1.49784	10.4	1.29784	235.8	241.8	1.49784	87	1.74784	80		1.49784	13.4	11
	1.5977	9.6	1.3977	256.2	231.2	1.5977	74.6	1.8477	75		1.5977	11.2	17
	1.69755	12.4	1.49755	213	209	1.69755	68.4	1.94755	74.8		1.69755	10.8	12
	1.79741	9.6	1.59741	213.4	195	1.79741	58.8	2.04741	65.2		1.79741	13	13.2
	1.89727	7.2	1.69727	194.4	179	1.89727	63.2	2.14727	57.4		1.89727	14	11.8
	1.99712	7.4	1.79712	170.4	167	1.99712	57.2	2.24712	59		1.99712	14.6	13
	2.09698	6.8	1.89698	162.8	152.8	2.09698	51.4	2.34698	55.8		2.09698	13.4	15.4
	2.19683	7.4	1.99683	159.6	137.6	2.19683	49.8	2.44683	49.2		2.19683	12.6	16
	2.29669	5	2.09669	151.4	135.6	2.29669	48.2	2.54669	45.2		2.29669	15	15.4
	2.39655	6	2.19655	154.4	120	2.39655	47.6	2.64655	46.4		2.39655	15.6	17.8
	2.4964	6.2	2.2964	153	124.6	2.4964	47.8	2.7464	43		2.4964	15	15.4
	2.59626	5	2.39626	145.8	123.2	2.59626	42.8	2.84626	43.8		2.59626	18	19.6
	2.69612	3.8	2.49612	136.8	124.4	2.69612	43.8	2.94612	44.4		2.69612	17.4	21
	2.79597	5.2	2.59597	133.2	112.2	2.79597	36.8	3.04597	48.2		2.79597	24.6	22
	2.89583	4.6	2.69583	128	114.2	2.89583	36.8	3.14583	51.2		2.89583	25.6	23.8
	2.99568	4.2	2.79568	137.2	102.8	2.99568	39.6	3.24568	42.6		2.99568	33.4	36.4
	3.09554	5	2.89554	128.8	116.2	3.09554	38.8	3.34554	44.8		3.09554	52	62.4
	3.1954	4.4	2.9954	131.2	108.6	3.1954	37.6	3.4454	54.2		3.1954	78.6	93.2
	3.29525	5.2	3.09525	122.6	115.8	3.29525	38	3.54525	44.4		3.29525	100.2	110
	3.39511	3	3.19511	128.8	129.6	3.39511	37.6	3.64511	49.8		3.39511	108.8	109.6
	3.49496	4.2	3.29496	119.4	121.2	3.49496	38.4	3.74496	47.4		3.49496	108.6	98.2
	3.59482	5.2	3.39482	132.2	112.8	3.59482	35.8	3.84482	47.8		3.59482	98.2	99
	3.69468	4.4	3.49468	133.2	111.8	3.69468	38.8	3.94468	47.4		3.69468	83.4	96.2
	3.79453	4	3.59453	123.8	112.2	3.79453	41.8	4.04453	48.8		3.79453	84	92.6
	3.89439	6	3.69439	116	108	3.89439	42.8	4.14439	41.6		3.89439	78	76.8
	3.99424	5.6	3.79424	126.8	118.8	3.99424	40.2	4.24424	39.2		3.99424	69.6	75.2
	4.0941	5	3.8941	127.4	114.6	4.0941	43.8	4.3441	39.2		4.0941	62.8	68.8
	4.19396	5	3.99396	138	116	4.19396	52.2	4.44396	45.6		4.19396	64	65.6
	4.29381	4.4	4.09381	125.2	112	4.29381	49.6	4.54381	41.6		4.29381	58.2	55.8
	4.39367	3.4	4.19367	130.8	117.2	4.39367	53	4.64367	48.2		4.39367	52.2	59.2
	4.49353	6.4	4.29353	133.2	112.8	4.49353	51.2	4.74353	51.6		4.49353	54.2	51.6
	4.59338	6	4.39338	134.2	118.2	4.59338	49	4.84338	44.6		4.59338	56.4	46.8
	4.69324	5.6	4.49324	131.8	119	4.69324	51.4	4.94324	47.2		4.69324	51.8	48.8
	4.79309	7	4.59309	134	119.8	4.79309	64.2	5.04309	54.4		4.79309	49.2	56.4
	4.89295	4.8	4.69295	149.4	128	4.89295	60.4	5.14295	53.6		4.89295	57.4	50.2
	4.99281	9.8	4.79281	146	134.6	4.99281	68.8	5.24281	68.8		4.99281	50.4	50.6
	5.09266	7	4.89266	151.6	144.8	5.09266	70.8	5.34266	67.8		5.09266	49.8	49.4
	5.19252	7.6	4.99252	167.2	140.6	5.19252	79.4	5.44252	76.8		5.19252	54.4	44.4
	5.29237	6.8	5.09237	187.2	167.6	5.29237	98.6	5.54237	86.2		5.29237	51.2	53.4
	5.39223	7.4	5.19223	197	162.4	5.39223	105	5.64223	105.2		5.39223	53.2	52.4
	5.49209	11.2	5.29209	222.6	189.4	5.49209	104.6	5.74209	100.8		5.49209	47.8	47.8
	5.59194	9.2	5.39194	241.2	201	5.59194	116.4	5.84194	108.6		5.59194	45.4	51.8
	5.6918	9.2	5.4918	268.8	235.6	5.6918	122.6	5.9418	102		5.6918	53.4	56.8
	5.79165	10.6	5.59165	286.2	256.2	5.79165	122.2	6.04165	111.2		5.79165	48.2	56.6
	5.89151	9	5.69151	303.8	266	5.89151	91.8	6.14151	111.6		5.89151	47	49.8
	5.99137	14.4	5.79137	285.8	284.4	5.99137	70.2	6.24137	79.4		5.99137	49.2	51.4
	6.09122	10	5.89122	188.8	241.2	6.09122	51	6.34122	52.4		6.09122	50.8	58.6
	6.19108	8.2	5.99108	102.8	143.6	6.19108	43.2	6.44108	39.2		6.19108	54.4	55.8
	6.29094	7.2	6.09094	66.6	81.8	6.29094	40.8	6.54094	38		6.29094	50.2	54.8
	6.39079	4.8	6.19079	48.2	64.2	6.39079	36.2	6.64079	35.6		6.39079	49.6	56.2
	6.49065	4.2	6.29065	39.4	48.2	6.49065	35.8	6.74065	30		6.49065	57.6	53.4
	6.5905	2.8	6.3905	34	37.2	6.5905	30.4	6.8405	30.2		6.5905	59.8	56.2
	6.69036	5.2	6.49036	32	30.2	6.69036	34.2	6.94036	30.8		6.69036	54.8	56.6
	6.79022	4.2	6.59022	24	30.6	6.79022	31.2	7.04022	28.4		6.79022	64.2	60.6
	6.89007	2	6.69007	26.8	32.8	6.89007	23.2	7.14007	34		6.89007	61.6	59.2
	6.98993	3.6	6.78993	24.2	23.8	6.98993	25.4	7.23993	29		6.98993	68	61.4
	7.08978	2.4	6.88978	20.2	25.6	7.08978	26	7.33978	29		7.08978	74.8	64
	7.18964	3.6	6.98964	19.6	26	7.18964	25.2	7.43964	30.8		7.18964	75.6	74.2
	7.2895	4.4	7.0895	19.4	27.2	7.2895	21.4	7.5395	23.2		7.2895	86	83
	7.38935	5	7.18935	15.6	20.2	7.38935	24.6	7.63935	26		7.38935	96	84.2
	7.48921	3.4	7.28921	16.8	22	7.48921	28.6	7.73921	32.6		7.48921	105.4	94.4
	7.58906	3.4	7.38906	15.4	17.6	7.58906	27	7.83906	24.6		7.58906	102.8	95.8
	7.68892	3.6	7.48892	18	18.8	7.68892	27.2	7.93892	20.8		7.68892	100	93.4
	7.78878	4	7.58878	13.6	14.8	7.78878	26.2	8.03878	24.6		7.78878	97.2	88.2
	7.88863	3.8	7.68863	12.6	13.6	7.88863	30	8.13863	21.4		7.88863	91.4	102.2
	7.98849	3.8	7.78849	10.8	11.8	7.98849	29	8.23849	26.4		7.98849	74.8	81
	8.08835	5.4	7.88835	13.2	15.6	8.08835	32.6	8.33835	23		8.08835	49.4	66.4
	8.1882	3.4	7.9882	11	15	8.1882	24	8.4382	26.4		8.1882	27.6	42
	8.28806	5.2	8.08806	8.8	14.8	8.28806	27.2	8.53806	22.8		8.28806	28.2	32.4
	8.38791	4.4	8.18791	9	17.6	8.38791	26.4	8.63791	25.8		8.38791	21.6	25.2
	8.48777	3.4	8.28777	11.2	17	8.48777	24.8	8.73777	27.8		8.48777	19.8	28.2
	8.58763	4	8.38763	8.8	15.2	8.58763	25.8	8.83763	41.4		8.58763	19	20.8
	8.68748	3.6	8.48748	10	13.6	8.68748	34.6	8.93748	57.6		8.68748	17.4	19
	8.78734	3	8.58734	9	10.6	8.78734	45.4	9.03734	70.2		8.78734	16.8	20
	8.88719	4.4	8.68719	11.4	16	8.88719	59.4	9.13719	75.2		8.88719	17.8	18.2
	8.98705	3	8.78705	10.2	12.8	8.98705	71.2	9.23705	86		8.98705	17	18
	9.08691	2	8.88691	13	14.2	9.08691	75.4	9.33691	89.2		9.08691	14.2	15.4
	9.18676	5	8.98676	11	18.4	9.18676	78.6	9.43676	103		9.18676	16.6	15.8
	9.28662	3	9.08662	10	25	9.28662	79.8	9.53662	110.8		9.28662	14.6	14.8
	9.38647	2.6	9.18647	12.6	28.6	9.38647	72.4	9.63647	118.4		9.38647	14.2	16
	9.48633	3.4	9.28633	12.8	31.2	9.48633	80.2	9.73633	106.8		9.48633	12.4	19.6
	9.58619	4	9.38619	14.2	34.4	9.58619	92.4	9.83619	94.4		9.58619	14.4	21.2
	9.68604	3.6	9.48604	14	35.2	9.68604	89.6	9.93604	81.2		9.68604	16.4	26.2
	9.7859	5	9.5859	13.6	31.6	9.7859	78	10.0359	81		9.7859	11.4	25.6
	9.88576	3.2	9.68576	10.6	22.8	9.88576	75.8	10.1358	78.2		9.88576	15	34.4
	9.98561	4.2	9.78561	9.2	21.2	9.98561	62.2	10.2356	76.4		9.98561	12.2	29.4
	10.0855	3.8	9.88547	10.6	20.6	10.0855	60	10.3355	69.4		10.0855	12.2	33
	10.1853	3.8	9.98532	10.6	18.4	10.1853	56.6	10.4353	76.8		10.1853	13.2	29.2
	10.2852	3.8	10.0852	11.6	17.8	10.2852	61.8	10.5352	83.4		10.2852	13	28.8
	10.385	4.6	10.185	11	24.6	10.385	64.6	10.635	73.2		10.385	12.4	24.4
	10.4849	3	10.2849	12.8	25.2	10.4849	61.2	10.7349	80.8		10.4849	11.6	28.2
	10.5847	2.2	10.3848	10.4	29.2	10.5847	70.4	10.8347	83.2		10.5847	10.8	33.2
	10.6846	2.2	10.4846	12.2	30.2	10.6846	74.2	10.9346	83.4		10.6846	11.8	39.8
	10.7845	1.8	10.5845	9.6	38.6	10.7845	80.8	11.0345	93.6		10.7845	14.4	43.8
	10.8843	3.8	10.6843	12.8	37	10.8843	86.8	11.1343	79.6		10.8843	11.6	53.2
	10.9842	1.8	10.7842	13.6	32.2	10.9842	71.8	11.2342	73		10.9842	13.8	61.4
	11.084	4.2	10.884	10.4	33.6	11.084	69.4	11.334	47		11.084	12	76.6
	11.1839	2.6	10.9839	12.2	36.8	11.1839	55.6	11.4339	39.8		11.1839	12.2	80
	11.2837	4.6	11.0837	11.2	32.2	11.2837	39.4	11.5337	30.6		11.2837	12.6	83.4
	11.3836	3.2	11.1836	12.6	32.4	11.3836	32.4	11.6336	21.6		11.3836	11.6	90
	11.4834	1.8	11.2835	13.4	32.8	11.4834	34.2	11.7334	23		11.4834	13.2	84.6
	11.5833	2.4	11.3833	14.2	29	11.5833	32	11.8333	24.4		11.5833	12.4	87.2
	11.6832	4	11.4832	10.6	26.2	11.6832	32.6	11.9332	21.2		11.6832	15.4	73.8
	11.783	4	11.583	14.2	14.2	11.783	25.4	12.033	19.4		11.783	13.6	76.4
	11.8829	2.4	11.6829	10	18	11.8829	29.4	12.1329	24.2		11.8829	15	74.4
	11.9827	2.4	11.7827	11.6	14.6	11.9827	29	12.2327	23.4		11.9827	13.4	54.2
	12.0826	3.4	11.8826	10.6	12.6	12.0826	34.8	12.3326	23.8		12.0826	10.6	56.2
	12.1824	5.8	11.9825	16.6	12.2	12.1824	34.2	12.4324	28		12.1824	11	54
	12.2823	1.8	12.0823	15	12.6	12.2823	28.6	12.5323	23.6		12.2823	10	61.4
	12.3822	2.4	12.1822	11	13.2	12.3822	27	12.6322	23		12.3822	12.6	58.2
	12.482	4.2	12.282	12.8	12.4	12.482	28	12.732	20.8		12.482	13.2	55
	12.5819	3	12.3819	11	13	12.5819	23.2	12.8319	24.4		12.5819	12.4	53.6
	12.6817	4	12.4817	10.2	15.6	12.6817	23.4	12.9317	25.4		12.6817	15.2	59
	12.7816	2	12.5816	10.4	14.6	12.7816	23.2	13.0316	22.2		12.7816	12.2	63.8
	12.8814	3.4	12.6814	15.4	12.2	12.8814	24.6	13.1314	25.6		12.8814	18.4	61.2
	12.9813	3.6	12.7813	11.4	14	12.9813	26.6	13.2313	19		12.9813	16	62.6
	13.0811	2.8	12.8811	8	11.2	13.0811	28	13.3311	22		13.0811	16	63.8
	13.181	2.4	12.981	10.4	15.6	13.181	24.2	13.431	24		13.181	11.8	58.6
	13.2809	3.6	13.0809	11.8	17.2	13.2809	26.4	13.5309	20.6		13.2809	15.4	52.8
	13.3807	2.8	13.1807	15.6	13	13.3807	23.8	13.6307	25.2		13.3807	12.8	39.8
	13.4806	2.8	13.2806	14.6	13.2	13.4806	24.2	13.7306	19		13.4806	13.2	26.2
	13.5804	2.6	13.3804	13.2	10.4	13.5804	23.8	13.8304	23.6		13.5804	13.8	19.8
	13.6803	3.2	13.4803	14.2	12	13.6803	26	13.9303	18.6		13.6803	15.6	15.4
	13.7801	3.8	13.5801	8.8	12.6	13.7801	24.4	14.0301	24		13.7801	11.6	16.4
	13.88	3	13.68	10.8	14.2	13.88	28.2	14.13	20.2		13.88	12.8	14.6
	13.9799	4	13.7799	8.4	13.8	13.9799	26	14.2299	21.2		13.9799	11.8	13.2
	14.0797	2.6	13.8797	11.2	12.2	14.0797	29.4	14.3297	25.2		14.0797	15.8	12
	14.1796	6	13.9796	11.6	15	14.1796	24.6	14.4296	25.6		14.1796	14.2	12
	14.2794	4.8	14.0794	11.2	14.4	14.2794	33	14.5294	27.4		14.2794	10.8	14.6
	14.3793	3.6	14.1793	13.6	12.6	14.3793	24	14.6293	27		14.3793	11.8	17.8
	14.4791	3	14.2791	12.8	15.6	14.4791	27.2	14.7291	23.8		14.4791	13.8	15
	14.579	3	14.379	11.4	14	14.579	27.8	14.829	30.6		14.579	12	13
	14.6789	3.4	14.4788	13.6	11.6	14.6789	22.6	14.9289	32.4		14.6789	12.6	13
	14.7787	3.8	14.5787	11.2	13.4	14.7787	27.2	15.0287	35		14.7787	12	12.2
	14.8786	3.8	14.6786	11	8.2	14.8786	31.2	15.1286	35.8		14.8786	13.6	14
	14.9784	2	14.7784	13.6	10	14.9784	26.4	15.2284	36		14.9784	10.6	12.8
	15.0783	3.8	14.8783	10.6	12.6	15.0783	29.4	15.3283	34.4		15.0783	12.6	12.2
	15.1781	3.2	14.9781	9.6	10	15.1781	26.6	15.4281	30.4		15.1781	12.2	14.4
	15.278	2.6	15.078	8	12.2	15.278	29	15.528	29.6		15.278	13.2	17.2
	15.3778	3.4	15.1778	10.4	11.6	15.3778	27.8	15.6278	27.8		15.3778	11.6	17.8
	15.4777	3.2	15.2777	9.4	9	15.4777	29.4	15.7277	26		15.4777	15.2	24.6
	15.5776	4.2	15.3775	10.8	13	15.5776	24.6	15.8276	23.8		15.5776	11.6	23.8
	15.6774	3	15.4774	10.4	10.8	15.6774	34.4	15.9274	22		15.6774	11.8	29
	15.7773	3.2	15.5773	8.6	11.4	15.7773	31.2	16.0273	27		15.7773	13	27
	15.8771	2.4	15.6771	8.8	13.2	15.8771	31.4	16.1271	28.4		15.8771	11.6	29
	15.977	3.6	15.777	9.4	10.8	15.977	30.2	16.227	30		15.977	12.2	28.4
	16.0768	3.4	15.8768	15.8	12.4	16.0768	27.4	16.3268	34		16.0768	13.4	22.8
	16.1767	4	15.9767	12.2	11.4	16.1767	32.2	16.4267	33		16.1767	9.8	24.6
	16.2766	3.2	16.0766	10.2	13.2	16.2766	28.2	16.5266	36.4		16.2766	18.4	22.2
	16.3764	3.8	16.1764	10.8	10.2	16.3764	27.8	16.6264	35.4		16.3764	14.4	26.2
	16.4763	3	16.2763	10.8	14.2	16.4763	33.6	16.7263	35.8		16.4763	12.4	29.8
	16.5761	3.8	16.3761	11.8	15.4	16.5761	32.2	16.8261	36.2		16.5761	15.6	28.4
	16.676	4.2	16.476	12	14.4	16.676	31.4	16.926	34.2		16.676	13.2	35
	16.7758	3	16.5758	10.4	12.6	16.7758	31.2	17.0258	40.4		16.7758	14	48.2
	16.8757	2.2	16.6757	10.2	14.2	16.8757	31.8	17.1257	38.8		16.8757	16	55.2
	16.9755	4	16.7755	9.4	14.8	16.9755	28.8	17.2255	44.6		16.9755	15.2	65
	17.0754	2.6	16.8754	13.2	17.8	17.0754	33	17.3254	58.4		17.0754	14.6	71.4
	17.1752	4.2	16.9752	11.4	10.6	17.1752	29.6	17.4252	74		17.1752	16.8	61.2
	17.2751	1.6	17.0751	13.8	11.8	17.2751	37.6	17.5251	90		17.2751	16.2	71.2
	17.375	3.2	17.175	12.4	15.8	17.375	45	17.625	100.6		17.375	13.4	70.2
	17.4748	3.8	17.2748	14	14.6	17.4748	66.2	17.7248	101.8		17.4748	13.2	69
	17.5747	2.6	17.3747	10.4	13	17.5747	71.8	17.8247	101		17.5747	16.6	73.4
	17.6745	3.8	17.4745	11.2	21.6	17.6745	90	17.9245	107.8		17.6745	13.6	61.4
	17.7744	2.4	17.5744	11.2	19	17.7744	84.2	18.0244	97.8		17.7744	16.8	65.8
	17.8742	3.2	17.6742	12.6	22	17.8742	87.4	18.1242	93.2		17.8742	15.8	60.8
	17.9741	3.2	17.7741	9.8	24.6	17.9741	88.2	18.2241	82		17.9741	14.2	61
	18.074	2.2	17.874	10.6	29.8	18.074	79.2	18.324	85		18.074	16	58.6
	18.1738	3.2	17.9738	9.4	28.8	18.1738	75.8	18.4238	80.2		18.1738	14.2	59.6
	18.2737	3.4	18.0737	12.2	22.6	18.2737	75.4	18.5237	70.8		18.2737	15.4	49.8
	18.3735	4.8	18.1735	11.2	23.8	18.3735	72	18.6235	65		18.3735	15.6	47.6
	18.4734	4.8	18.2734	12.6	19.2	18.4734	75.2	18.7234	57		18.4734	14	54
	18.5732	3.2	18.3732	10.4	16.4	18.5732	74.6	18.8232	63		18.5732	14.6	56.8
	18.6731	3.6	18.4731	14.6	18.8	18.6731	73.8	18.9231	64.4		18.6731	19.8	61.6
	18.773	3.4	18.5729	15.4	19.6	18.773	87.4	19.023	68.6		18.773	18	61
	18.8728	3.8	18.6728	13	23.4	18.8728	93.4	19.1228	62.6		18.8728	15.4	55
	18.9727	3.2	18.7727	12.8	25.2	18.9727	88.4	19.2227	67		18.9727	15.4	56
	19.0725	4.2	18.8725	11.2	23.8	19.0725	98.6	19.3225	69.6		19.0725	15	46.8
	19.1724	3.4	18.9724	11.6	30	19.1724	91.2	19.4224	69		19.1724	15.8	42.2
	19.2722	5	19.0722	9.6	31.8	19.2722	89.6	19.5222	68.2		19.2722	21.4	30.8
	19.3721	3.4	19.1721	7.6	33.4	19.3721	84.6	19.6221	51.8		19.3721	21.8	27.4
	19.4719	4	19.2719	12.6	27	19.4719	75.4	19.7219	39.8		19.4719	23.4	32.4
	19.5718	2.4	19.3718	9	29.6	19.5718	71.6	19.8218	28		19.5718	26.6	59
	19.6716	2.4	19.4717	11.8	32.6	19.6716	61	19.9216	27		19.6716	56	83
	19.7715	2.6	19.5715	10	31.4	19.7715	48	20.0215	27		19.7715	84.4	106.8
	19.8714	4.6	19.6714	11.6	30.6	19.8714	36.6	20.1214	27.8		19.8714	98.6	102
	19.9712	2.6	19.7712	13.4	27.2	19.9712	31.4	20.2212	24.8		19.9712	102.6	91.4
	20.0711	3.6	19.8711	9.4	26.4	20.0711	25.4	20.3211	24.4		20.0711	96.2	90.4
	20.1709	4.2	19.9709	6.8	21.4	20.1709	19.4	20.4209	25.6		20.1709	92.8	80.8
	20.2708	4.6	20.0708	14.2	18.4	20.2708	22.8	20.5208	21.2		20.2708	84.8	71.6
	20.3707	3.6	20.1706	15.2	17.6	20.3707	20.4	20.6207	22.6		20.3707	77.2	69.2
	20.4705	2.8	20.2705	12.4	13.8	20.4705	19	20.7205	24.8		20.4705	67.6	67.8
	20.5704	5.6	20.3704	11.8	14.2	20.5704	19.8	20.8204	24.2		20.5704	67.2	61.8
	20.6702	3	20.4702	12.8	10.8	20.6702	20.4	20.9202	26.4		20.6702	58.8	58.8
	20.7701	3.8	20.5701	11.4	16	20.7701	20.4	21.0201	26.6		20.7701	60	56.6
	20.8699	4	20.6699	15	16	20.8699	22.2	21.1199	29.8		20.8699	49.2	49.8
	20.9698	3.8	20.7698	11.6	14.4	20.9698	23.2	21.2198	29		20.9698	53.4	48.2
	21.0696	2	20.8696	15	19	21.0696	26	21.3196	28.4		21.0696	51.2	52
	21.1695	1.8	20.9695	11.8	13.4	21.1695	21	21.4195	29.2		21.1695	48.6	48.6
	21.2693	3.6	21.0694	16.4	13.2	21.2693	24.2	21.5193	33		21.2693	51	48
	21.3692	3.4	21.1692	13	13	21.3692	24.6	21.6192	29.8		21.3692	51.6	48.4
	21.4691	3.6	21.2691	13.2	18.4	21.4691	25.6	21.7191	27.4		21.4691	47.4	51.4
	21.5689	3.8	21.3689	11.2	21	21.5689	18.8	21.8189	25.8		21.5689	42	47.6
	21.6688	3.8	21.4688	16	20.8	21.6688	23.4	21.9188	27.4		21.6688	43.4	46.6
	21.7686	4.2	21.5686	19.2	17.8	21.7686	21.8	22.0186	29.8		21.7686	46	50
	21.8685	3.2	21.6685	14.6	23.2	21.8685	20.8	22.1185	29.8		21.8685	45	47.2
	21.9684	5	21.7684	19.6	19.4	21.9684	24.6	22.2184	28.6		21.9684	44.2	46
	22.0682	5.6	21.8682	18	26.4	22.0682	26.8	22.3182	38.4		22.0682	43.4	45.6
	22.1681	5.8	21.9681	25	26.8	22.1681	31.4	22.4181	56		22.1681	44.4	44.8
	22.2679	4.4	22.0679	26.2	24.4	22.2679	27	22.5179	83.6		22.2679	37.8	45.2
	22.3678	8.8	22.1678	31	43	22.3678	34.8	22.6178	92.2		22.3678	48	44
	22.4676	10.6	22.2676	38.2	48.2	22.4676	54.4	22.7176	93.6		22.4676	46.6	46.2
	22.5675	13.6	22.3675	48.2	60.6	22.5675	108	22.8175	89		22.5675	44.2	52.4
	22.6673	12.4	22.4673	74.4	100	22.6673	136.8	22.9173	83.8		22.6673	45	39.6
	22.7672	13.2	22.5672	115	138.8	22.7672	129.4	23.0172	86.6		22.7672	50.6	46.4
	22.867	12.4	22.667	183.6	203.4	22.867	126.4	23.117	77.2		22.867	42.2	51
	22.9669	10.6	22.7669	226.8	224.8	22.9669	117.4	23.2169	65		22.9669	55.4	46.8
	23.0668	8.8	22.8668	244.8	237	23.0668	117.6	23.3168	63.6		23.0668	54.2	49
	23.1666	8.8	22.9666	235	234.8	23.1666	103.6	23.4166	55.6		23.1666	53.2	50.6
	23.2665	10.6	23.0665	231.6	223.2	23.2665	93	23.5165	54.8		23.2665	59.6	50.8
	23.3663	9.8	23.1663	224.6	210.4	23.3663	86.6	23.6163	40.2		23.3663	56.4	56.4
	23.4662	5.4	23.2662	216.8	191.4	23.4662	73.2	23.7162	42.2		23.4662	61.2	57.4
	23.566	5.8	23.366	181.6	160.6	23.566	75	23.816	44		23.566	68.8	64.6
	23.6659	8	23.4659	177.2	155.8	23.6659	59	23.9159	45.4		23.6659	74.2	70.2
	23.7658	6.2	23.5658	153.6	148.8	23.7658	60.2	24.0158	34		23.7658	82.8	70
	23.8656	5.4	23.6656	147.4	146.8	23.8656	57.2	24.1156	34.6		23.8656	87	73.8
	23.9655	7	23.7655	135.2	143.4	23.9655	50.4	24.2155	35.2		23.9655	92	79.8
	24.0653	4.6	23.8653	135.2	131.2	24.0653	52.6	24.3153	37.8		24.0653	94	92.8
	24.1652	8	23.9652	135.4	132.4	24.1652	50	24.4152	32.2		24.1652	103.6	88
	24.265	3	24.065	130.6	125.4	24.265	48.2	24.515	33.4		24.265	94.4	79.8
	24.3649	4.8	24.1649	129.8	119	24.3649	49.2	24.6149	37.6		24.3649	95.2	93.2
	24.4647	4.2	24.2647	125.2	123.2	24.4647	48	24.7147	32.6		24.4647	72	87.6
	24.5646	6.4	24.3646	122.6	119.2	24.5646	48.6	24.8146	33.2		24.5646	43.4	63.2
	24.6645	4.4	24.4645	111	123.2	24.6645	52.4	24.9145	33.2		24.6645	32.4	41.8
	24.7643	5.4	24.5643	122.6	121.4	24.7643	46.8	25.0143	28.4		24.7643	26	30.2
	24.8642	3.6	24.6642	112.8	115.8	24.8642	45	25.1142	37.6		24.8642	22	23.8
	24.964	5.6	24.764	122.6	122.6	24.964	50	25.214	33.6		24.964	25	22.4
	25.0639	3.2	24.8639	125	109.2	25.0639	46.4	25.3139	32.4		25.0639	19.8	19.8
	25.1637	5.8	24.9637	116.8	112.6	25.1637	43	25.4137	34.8		25.1637	18.8	17.6
	25.2636	4.6	25.0636	120.4	107.8	25.2636	44.4	25.5136	42.2		25.2636	16.4	16.6
	25.3635	4.4	25.1635	115	112.2	25.3635	50.4	25.6135	38		25.3635	19	16
	25.4633	4.8	25.2633	126.2	118.2	25.4633	47.8	25.7133	42.2		25.4633	16.6	13.6
	25.5632	4.4	25.3632	121	112.8	25.5632	43.6	25.8132	35.4		25.5632	17.4	15.6
	25.663	4	25.463	114.6	114	25.663	40.4	25.913	42.6		25.663	11	18.8
	25.7629	4	25.5629	120.8	118.4	25.7629	45.2	26.0129	36.8		25.7629	13.6	16.4
	25.8627	5	25.6627	114	120.4	25.8627	46.8	26.1127	41.8		25.8627	16.8	11.8
	25.9626	7.2	25.7626	118.4	111.6	25.9626	52.2	26.2126	42.2		25.9626	12	11.8
	26.0624	6	25.8624	122	115.8	26.0624	58	26.3124	49.8		26.0624	16.8	12.6
	26.1623	7	25.9623	126.2	119.6	26.1623	47.6	26.4123	47.8		26.1623	14.8	15
	26.2622	7.4	26.0622	139.4	127.4	26.2622	56.8	26.5122	55.2		26.2622	14.8	13.4
	26.362	6.4	26.162	131.4	127.4	26.362	55	26.612	60.8		26.362	13.4	11
	26.4619	7.4	26.2619	133.8	130	26.4619	55.4	26.7119	70.4		26.4619	10.6	15
	26.5617	6.6	26.3617	142.6	140.8	26.5617	65.8	26.8117	73.2		26.5617	13.2	13.4
	26.6616	8.2	26.4616	154.8	139.8	26.6616	72.8	26.9116	81.6		26.6616	15.4	14.2
	26.7614	9.6	26.5614	164	137	26.7614	74.8	27.0114	93.2		26.7614	16	13.6
	26.8613	8.6	26.6613	180.6	158.2	26.8613	66.8	27.1113	96.4		26.8613	14.2	17.4
	26.9611	11.2	26.7612	186.2	156.4	26.9611	89	27.2111	98.2		26.9611	15.8	13.4
	27.061	10.8	26.861	201.2	176.2	27.061	91	27.311	98.6		27.061	12.8	12.6
	27.1609	14.4	26.9609	215	202.2	27.1609	100.2	27.4109	100.6		27.1609	13.6	12.2
	27.2607	12.8	27.0607	221.4	213	27.2607	107	27.5107	82.4		27.2607	12.6	13.6
	27.3606	13.4	27.1606	239	241.4	27.3606	114.8	27.6106	57.4		27.3606	10	16.6
	27.4604	9	27.2604	239.2	234	27.4604	119	27.7104	52.6		27.4604	11.8	16.2
	27.5603	8.8	27.3603	245.6	223.4	27.5603	129.6	27.8103	40.6		27.5603	12.6	13.8
	27.6601	10.8	27.4601	246.2	227.8	27.6601	121.4	27.9101	38.6		27.6601	13	13.2
