# Supplementary material for: CTP promotes efficient ParB-dependent DNA condensation by facilitating one-dimensional diffusion from parS
Source: eLife. 2021 Jul 12;10:e67554. doi: 10.7554/eLife.67554 (PMC8299390; doi:10.7554/eLife.67554)
Supplement: Figure 4—figure supplement 1—source data 1. [file elife-67554-fig4-figsupp1-data1.xlsx]

## Sheet: Fig4-Suppl1
Fig4-Sup1A	13xparS		2 mM CTP	4 mM MgCl2				Fig4-Sup1B	13xparS	0 mM CTP	4 mM MgCl2		Fig4-Sup1C			13xparS	0 mM CTP	4 mM MgCl2
						10nM
			No ParB	2 nM ParB2	5 nM ParB2	10 nM ParB2					200 nM ParB2				No ParB		100 nM		200 nM		500 nM
	Time (s)	Force (pN)	Extension	Extension	Extension	Extension			Time (s)	Force (pN)	Extension			Force	Extension	SEM	Extension	SEM	Extension	SEM	Extension	SEM
	0.085	4.07541	2.028	2.0789	2.0248	2.0828			0.01	4.07541	2.0415			4.96913	0.89593	0.03017	0.88709	0.01548	0.88757	0.02051	0.92919	0.00862
	0.092	4.07541	2.0541	2.0578	2.0143	2.1138			0.018	4.07541	2.0568			4.64421	0.88902	0.02981	0.88093	0.01666	0.88328	0.02086	0.89219	0.01665
	0.102	4.07541	2.0519	2.035	1.9986	2.1044			0.027	4.07541	2.0766			4.34053	0.8851	0.02938	0.87644	0.0176	0.88355	0.02115	0.89814	0.01185
	0.109	4.07541	2.0336	2.0718	2.0308	2.1194			0.035	4.07541	2.0428			3.79146	0.87789	0.02896	0.86825	0.01815	0.87894	0.02201	0.88728	0.01325
	0.117	4.07541	2.0489	2.0396	2.012	2.0753			0.044	4.07541	2.0092			3.31184	0.8707	0.02895	0.86513	0.01636	0.86435	0.02214	0.87812	0.01533
	0.126	4.07541	2.0533	2.0599	1.9887	2.0776			0.052	4.07541	2.0092			2.52694	0.85717	0.02921	0.85734	0.01526	0.85292	0.02052	0.85274	0.02336
	0.134	4.07486	2.0621	2.0305	2.0333	2.1507			0.06	4.07486	2.0109			1.68416	0.84213	0.03006	0.85291	0.01366	0.83691	0.01772	0.8236	0.03129
	0.143	4.07486	2.0323	2.0764	2.0078	2.0686			0.072	4.07486	2.064			1.28502	0.80635	0.03076	0.83115	0.01132	0.80552	0.01829	0.75091	0.05843
	0.152	4.07486	2.0299	2.049	2.0235	2.091			0.077	4.07486	2.0518			1.12247	0.78508	0.03086	0.81067	0.01385	0.79366	0.01961	0.72629	0.06635
	0.16	4.07486	2.0251	2.0724	2.0077	2.1342			0.085	4.07486	2.0397			0.65347	0.72125	0.02984	0.75121	0.01126	0.74129	0.02053	0.58731	0.10054
	0.168	4.07486	2.0433	2.0441	2.0302	2.0839			0.094	4.07486	2.051			0.43553	0.67492	0.03011	0.70927	0.00932	0.6832	0.02113	0.49538	0.10767
	0.177	4.07376	2.0512	2.0331	2.0066	2.149			0.102	4.07376	2.025			0.33231	0.64643	0.02913	0.67297	0.00996	0.63103	0.02183	0.39212	0.08802
	0.184	4.07321	2.0089	2.0646	2.0332	2.1088			0.11	4.07321	2.0085			0.16899	0.56302	0.0354	0.53927	0.00939	0.48169	0.01939	0.15604	0.04406
	0.193	4.07101	2.0446	2.0754	2.0194	2.1326			0.119	4.07101	2.0414			0.11263	0.4019	0.0372	0.41039	0.01882	0.39447	0.01824	0.1348	0.04114
	0.202	4.07045	2.0313	2.0601	1.999	2.0888			0.127	4.07045	2.047			0.08593	0.34847	0.04574	0.33802	0.01377	0.34459	0.01961	--	--
	0.209	4.0699	2.0216	2.0658	1.9941	2.1134			0.135	4.0699	2.056			0.0437	0.22214	0.04187	0.19602	0.02333	0.19238	0.02108	0.10713	0.0034
	0.218	4.0699	2.0118	2.0736	1.9905	2.1169			0.144	4.0699	2.0598			0.02222	0.12922	0.03601	0.12683	0.02336	0.08715	0.00879	0.10916	0.00294
	0.226	4.06825	2.0182	2.0688	2.0121	2.1068			0.152	4.06825	2.0321			0.0113	0.12117	0.02923	0.08665	0.02754	0.06591	0.01286	0.10828	0.02822
	0.234	4.0677	2.0612	2.0558	2.0141	2.1056			0.161	4.0677	2.0314			0.00292	0.11379	0.04353	0.07222	0.01928	0.04299	0.0092	0.11071	0.00794
	0.243	4.0677	2.044	2.0631	2.0038	2.0893			0.169	4.0677	2.0128			0.00149	0.10002	0.04162	0.07358	0.02893	0.03146	0.01045	0.10741	0.01385
	0.251	4.06715	2.0561	2.058	2.0177	2.1037			0.177	4.06715	2.0572			0.000755745	0.10443	0.04685	0.07483	0.01626	0.02619	0.01028	0.11228	0.01361
	0.26	4.06715	2.0469	2.0385	1.9842	2.1053			0.185	4.06715	2.0436			--	--	--	--	--	--	--	--	--
	0.268	4.06715	2.0319	2.0586	2.0182	2.1045			0.194	4.06715	2.06			--	--	--	--	--	--	--	--	--
	0.277	4.0666	2.0657	2.0675	1.9927	2.1349			0.202	4.0666	2.0402
	0.284	4.0666	2.0637	2.0793	1.9993	2.0905			0.21	4.0666	2.0488
	0.292	4.0655	2.0394	2.061	2.035	2.0914			0.219	4.0655	2.024
	0.301	4.06495	2.0264	2.0483	2.0176	2.1432			0.227	4.06495	2.0369
	0.31	4.0644	2.0615	2.034	2.0179	2.1293			0.235	4.0644	2.0658
	0.318	4.0644	2.0265	2.0642	2.0249	2.0774			0.244	4.0644	2.0509
	0.326	4.06385	2.0338	2.0435	2.0375	2.1048			0.252	4.06385	2.0184
	0.334	4.06275	2.0118	2.0261	2.0203	2.0933			0.26	4.06275	2.0326
	0.343	4.06275	2.0155	2.0121	2.0153	2.1109			0.269	4.06275	2.0543
	0.352	4.06221	2.0437	2.058	2.0429	2.1269			0.277	4.06221	2.0321
	0.36	4.06221	2.0577	2.0667	2.0292	2.1			0.285	4.06221	2.0141
	0.368	4.06221	2.0419	2.0458	2.0195	2.0817			0.294	4.06221	2.0191
	0.376	4.06166	2.0528	2.0708	2.0409	2.1279			0.302	4.06166	2.0603
	0.385	4.06166	2.0339	2.0724	2.0233	2.114			0.31	4.06166	2.0664
	0.392	4.06166	2.0267	2.0719	2.0181	2.0861			0.319	4.06166	2.0478
	0.401	4.06056	2.0356	2.0426	2.0016	2.1423			0.327	4.06056	2.0271
	0.41	4.06056	2.0335	2.0831	2.016	2.0834			0.335	4.06056	2.0388
	0.418	4.06001	2.0488	2.0634	2.01	2.1219			0.344	4.06001	2.0327
	0.426	4.06001	2.0523	2.0571	2.0117	2.0965			0.352	4.06001	2.0638
	0.435	4.06001	2.0252	2.0603	2.0151	2.1115			0.36	4.06001	2.0439
	0.442	4.05946	2.0738	2.0562	2.0163	2.0976			0.369	4.05946	2.0606
	0.451	4.05946	2.062	2.0561	2.0266	2.1168			0.377	4.05946	2.0647
	0.46	4.05946	2.0435	2.0674	2.0325	2.1019			0.385	4.05946	2.0613
	0.468	4.05946	2.0422	2.0484	1.9926	2.1056			0.394	4.05946	2.0632
	0.476	4.05946	2.0192	2.0619	2.0184	2.1034			0.402	4.05946	2.0674
	0.485	4.05891	2.0547	2.0724	2.0247	2.07			0.41	4.05891	2.0472
	0.492	4.05891	2.0492	2.0621	2.0161	2.0868			0.419	4.05891	2.095
	0.5	4.05891	2.0385	2.0512	1.9967	2.1021			0.427	4.05891	2.0102
	0.51	4.05891	2.0346	2.0619	2.0243	2.0786			0.435	4.05891	2.0009
	0.517	4.05891	2.035	2.0573	2.0064	2.1033			0.444	4.05891	2.0268
	0.526	4.05781	2.0458	2.0685	2.0359	2.0751			0.452	4.05781	2.0231
	0.535	4.05781	2.0302	2.0568	2.0045	2.1092			0.46	4.05781	2.0097
	0.542	4.05781	2.0384	2.0123	1.9968	2.0943			0.469	4.05781	1.9554
	0.552	4.05781	2.0682	2.0566	2.0068	2.112			0.477	4.05781	2.0373
	0.56	4.05781	2.0567	2.0715	2.0302	2.0883			0.485	4.05781	2.0412
	0.568	4.05781	2.052	2.055	2.0442	2.0785			0.494	4.05781	2.0143
	0.576	4.05781	2.04	2.0842	2.0133	2.0952			0.502	4.05781	2.0438
	0.585	4.05781	2.0434	2.0552	2.0134	2.1106			0.51	4.05781	2.0236
	0.592	4.05781	2.0672	2.0656	1.9883	2.1118			0.519	4.05781	2.038
	0.6	4.05781	2.0628	2.0799	2.0186	2.1021			0.527	4.05781	2.0378
	0.61	4.05781	2.0511	2.0453	2.0346	2.101			0.535	4.05781	2.0375
	0.618	4.05726	2.0455	2.0728	2.0041	2.1023			0.544	4.05726	2.0531
	0.626	4.05726	2.0607	2.0709	2.0103	2.1226			0.552	4.05726	2.0565
	0.635	4.05726	2.0392	2.0312	2.0143	2.0601			0.56	4.05726	2.0667
	0.642	4.05726	2.0386	2.0517	2.0241	2.0783			0.569	4.05726	2.0607
	0.651	4.05726	2.0192	2.0392	2.0512	2.1245			0.577	4.05726	2.0745
	0.66	4.05726	2.0218	2.0449	2.0295	2.068			0.585	4.05726	2.089
	0.668	4.05726	2.0577	2.0627	2.0226	2.0607			0.594	4.05726	2.0694
	0.676	4.05672	2.0302	2.0688	2.0301	2.0907			0.602	4.05672	2.044
	0.684	4.05672	2.0149	2.0497	2.0243	2.1187			0.61	4.05672	2.0061
	0.694	4.05672	2.0266	2.0619	2.0104	2.0988			0.621	4.05672	2.0228
	0.701	4.05672	2.0601	2.0804	2.0201	2.1148			0.627	4.05672	2.0221
	0.71	4.05672	2.0179	2.0416	2.0187	2.0954			0.635	4.05672	2.019
	0.718	4.05672	2.0388	2.0525	2.0151	2.1312			0.643	4.05672	2.005
	0.727	4.05672	2.0418	2.0812	2.0133	2.0638			0.652	4.05672	2.0296
	0.734	4.05672	2.0305	2.0707	1.9988	2.1026			0.66	4.05672	2.0519
	0.743	4.05672	2.045	2.0631	2.0315	2.0978			0.669	4.05672	2.0425
	0.75	4.05672	2.0474	2.0692	2.0012	2.1228			0.677	4.05672	2.0273
	0.76	4.05672	2.0103	2.053	2.0217	2.1219			0.685	4.05672	2.0409
	0.768	4.05672	2.0461	2.0548	2.016	2.1062			0.693	4.05672	2.0498
	0.775	4.05672	2.05	2.072	2.0069	2.0826			0.702	4.05672	2.0404
	0.785	4.05672	2.0427	2.0408	2.0153	2.0955			0.71	4.05672	1.9966
	0.793	4.05672	2.0236	2.0522	2.0044	2.1016			0.719	4.05672	2.0006
	0.8	4.05672	2.0049	2.0445	2.0032	2.1108			0.727	4.05672	2.0443
	0.81	4.05672	2.0502	2.0273	2.0163	2.1194			0.735	4.05672	2.0652
	0.818	4.05672	2.0433	2.0769	2.0136	2.1466			0.743	4.05672	2.0258
	0.826	4.05672	2.0498	2.0593	2.0106	2.0863			0.752	4.05672	2.0052
	0.835	4.05672	2.0532	2.0201	2.0089	2.1247			0.76	4.05672	2.0488
	0.843	4.05672	2.035	2.0323	2.0175	2.0975			0.768	4.05672	2.0108
	0.851	4.05672	2.0285	2.0199	2.0332	2.1162			0.777	4.05672	2.053
	0.86	4.05672	2.0401	2.0499	2.0066	2.1043			0.785	4.05672	2.0405
	0.868	4.05672	2.051	2.0415	2.0001	2.0845			0.794	4.05672	2.0182
	0.876	4.05672	2.0576	2.0409	2.0105	2.1027			0.802	4.05672	2.0313
	0.885	4.05672	2.0572	2.0617	2.0043	2.0843			0.81	4.05672	2.0416
	0.892	4.05672	2.0314	2.0464	2.0363	2.1094			0.819	4.05672	2.0424
	0.9	4.05672	2.054	2.0444	2.0138	2.0749			0.827	4.05672	2.0617
	0.91	4.05672	2.056	2.0545	2.0222	2.1077			0.835	4.05672	2.0388
	0.918	4.05672	2.0445	2.0562	1.9903	2.1261			0.843	4.05672	2.0211
	0.926	4.05672	2.0643	2.0525	2.0116	2.0859			0.852	4.05672	2.0222
	0.935	4.05672	2.0305	2.0533	2.0228	2.1268			0.86	4.05672	2.0835
	0.943	4.05617	2.0707	2.0654	2.0159	2.109			0.868	4.05617	2.0143
	0.952	4.05617	2.0312	2.0522	1.9991	2.1072			0.877	4.05617	2.0444
	0.959	4.05617	2.0355	2.0866	2.0089	2.0621			0.885	4.05617	2.0756
	0.968	4.05617	2.0626	2.0136	2.0135	2.0773			0.893	4.05617	2.0299
	0.976	4.05617	2.0207	2.0699	2.0288	2.0942			0.902	4.05617	2.0862
	0.985	4.05617	2.0267	2.0697	2.0103	2.0935			0.91	4.05617	2.0434
	0.993	4.05617	2.0411	2.0712	2.0248	2.1258			0.918	4.05617	2.0612
	1.001	4.05617	2.046	2.062	2.0207	2.0926			0.927	4.05617	2.0609
	1.009	4.05617	2.0321	2.0469	2.0105	2.0938			0.935	4.05617	2.054
	1.018	4.05617	2.0407	2.0732	2.0046	2.1254			0.943	4.05617	2.0096
	1.027	4.05617	2.037	2.0466	2.0105	2.0877			0.952	4.05617	2.0672
	1.034	4.05617	2.01	2.0553	2.0017	2.0725			0.96	4.05617	2.0785
	1.043	4.05617	2.0339	2.0521	2.017	2.0846			0.968	4.05617	2.0321
	1.051	4.05617	2.0459	2.088	2.0119	2.0893			0.977	4.05617	2.0251
	1.059	4.05617	2.0415	2.0523	1.9822	2.0869			0.985	4.05617	2.0345
	1.068	4.05617	2.0484	2.0477	2.0195	2.1153			0.993	4.05617	2.044
	1.076	4.05617	2.0008	2.0561	2.0072	2.0832			1.002	4.05617	2.0185
	1.085	4.05617	2.0346	2.0699	1.9953	2.1034			1.01	4.05617	2.0195
	1.093	4.05617	2.0229	2.0353	2.0045	2.1245			1.018	4.05617	2.0366
	1.102	4.05617	2.0203	2.0561	1.9941	2.102			1.027	4.05617	2.0287
	1.109	4.05617	2.0554	2.0515	2.0256	2.0831			1.035	4.05617	2.0066
	1.118	4.05617	2.0459	2.0714	2.0084	2.0737			1.043	4.05617	2.06
	1.126	4.05617	2.0673	2.0698	2.0075	2.089			1.052	4.05617	2.0567
	1.134	4.05617	2.0321	2.0625	2.0138	2.1033			1.061	4.05617	2.115
	1.143	4.05617	2.0234	2.0621	2.0074	2.0893			1.068	4.05617	2.0449
	1.15	4.05617	2.0446	2.0802	2.0175	2.1018			1.077	4.05617	2.0663
	1.16	4.05617	2.0594	2.045	2.0242	2.122			1.085	4.05617	2.0364
	1.167	4.05617	2.0336	2.0632	1.9839	2.102			1.093	4.05617	2.0091
	1.176	4.05617	2.0587	2.0306	2.0143	2.0805			1.102	4.05617	2.0471
	1.185	4.05617	2.0443	2.0541	2.0101	2.0995			1.11	4.05617	2.0132
	1.193	4.05617	2.0487	2.0453	2.0345	2.0938			1.119	4.05617	2.0515
	1.201	4.05617	2.0244	2.0803	2.0033	2.1086			1.127	4.05617	2.0544
	1.21	4.05617	2.0564	2.0904	1.9886	2.1088			1.135	4.05617	2.0506
	1.217	4.05617	2.0549	2.0604	1.9854	2.1216			1.143	4.05617	2.0014
	1.226	4.05617	2.0477	2.0604	2.0275	2.0965			1.152	4.05617	2.0338
	1.235	4.05617	2.0506	2.0533	2.0122	2.0778			1.16	4.05617	2.0253
	1.242	4.05617	2.036	2.0521	1.999	2.1005			1.17	4.05617	2.0197
	1.251	4.05617	2.0466	2.053	2.0325	2.0858			1.177	4.05617	2.0283
	1.259	4.05617	2.061	2.0717	2.0328	2.1058			1.185	4.05617	2.0192
	1.267	4.05617	2.0322	2.0679	2.0217	2.0978			1.193	4.05617	2.0047
	1.276	4.05617	2.0585	2.0485	2.0041	2.0847			1.202	4.05617	2.011
	1.284	4.05617	2.0538	2.0582	2.0372	2.0667			1.21	4.05617	2.0307
	1.292	4.05617	2.0237	2.0685	2.0167	2.0969			1.218	4.05617	2.0209
	1.301	4.05617	2.0437	2.0857	1.9895	2.1197			1.227	4.05617	2.0427
	1.309	4.05617	2.0168	2.0528	2.0069	2.1237			1.235	4.05617	2.057
	1.317	4.05617	2.0551	2.04	2.0444	2.038			1.243	4.05617	2.0638
	1.326	4.05617	2.0369	2.0801	2.0306	2.0462			1.252	4.05617	2.0424
	1.334	4.05617	2.053	2.0735	2.0122	2.0955			1.26	4.05617	2.0611
	1.343	4.05617	2.0302	2.0417	2.0169	2.0664			1.268	4.05617	2.0885
	1.351	4.05617	2.0494	2.0632	2.0173	2.1387			1.277	4.05617	2.0457
	1.359	4.05617	2.0602	2.0591	2.045	2.103			1.285	4.05617	2.0338
	1.367	4.05617	2.0376	2.0715	2.001	2.1356			1.293	4.05617	2.0328
	1.376	4.05617	2.0272	2.0565	1.972	2.0934			1.302	4.05617	2.0593
	1.384	4.05617	2.0308	2.0675	2.0016	2.1044			1.31	4.05617	2.0578
	1.393	4.05617	2.0409	2.0468	2.0011	2.0475			1.319	4.05617	2.0645
	1.401	4.05617	2.0302	2.0469	2.0026	2.1089			1.327	4.05617	2.0459
	1.409	4.05617	2.0576	2.0635	2.0201	2.1583			1.335	4.05617	2.04
	1.418	4.05617	2.0527	2.0561	1.9967	2.1249			1.344	4.05617	2.0588
	1.425	4.05617	2.0564	2.0614	2.0253	2.1158			1.352	4.05617	2.0395
	1.434	4.05617	2.0509	2.0279	1.995	2.1194			1.36	4.05617	2.0284
	1.443	4.05617	2.0461	2.0792	2.0006	2.1134			1.368	4.05617	2.0152
	1.451	4.05617	2.0469	2.0561	2.0072	2.0907			1.377	4.05617	2.0604
	1.459	4.05617	2.0505	2.0762	2.02	2.1083			1.385	4.05617	2.0303
	1.468	4.05617	2.0347	2.0588	2.0384	2.0873			1.393	4.05617	2.0172
	1.475	4.05617	2.0603	2.0761	2.023	2.125			1.402	4.05617	2.072
	1.484	4.05617	2.0409	2.0729	2.0074	2.0626			1.41	4.05617	2.0553
	1.493	4.05617	2.0357	2.0707	2.0062	2.08			1.418	4.05617	2.0416
	1.501	4.05617	2.0192	2.0639	2.0243	2.0987			1.427	4.05617	2.0556
	1.509	4.05617	2.0345	2.0715	2.0038	2.0887			1.435	4.05617	1.9987
	1.518	4.05617	2.0421	2.0767	2.0233	2.141			1.443	4.05617	2.0156
	1.525	4.05617	2.0289	2.0521	2.0187	2.082			1.452	4.05617	2.0928
	1.534	4.05617	2.0258	2.0434	2.0017	2.1112			1.46	4.05617	2.0725
	1.543	4.05617	2.0313	2.0689	1.9909	2.0843			1.468	4.05617	2.0184
	1.55	4.05617	2.0089	2.0641	1.9966	2.0695			1.477	4.05617	2.03
	1.56	4.05617	2.0276	2.0483	2.0137	2.1269			1.485	4.05617	2.0439
	1.568	4.05617	2.0317	2.0565	2.0241	2.1016			1.493	4.05617	2.0474
	1.575	4.05617	2.0386	2.0363	1.9953	2.0914			1.501	4.05617	2.0606
	1.584	4.05617	2.038	2.0582	1.9995	2.0866			1.51	4.05617	2.0664
	1.593	4.05617	2.0134	2.0277	2.0213	2.0956			1.518	4.05617	2.0785
	1.601	4.05617	2.039	2.0527	2.0166	2.1081			1.527	4.05617	2.0984
	1.61	4.05617	2.0291	2.047	2.0068	2.1094			1.535	4.05617	2.05
	1.618	4.05617	2.0276	2.0598	2.0227	2.098			1.543	4.05617	2.0647
	1.625	4.05617	2.062	2.0461	2.0081	2.1332			1.552	4.05617	2.0513
	1.634	4.05617	2.0475	2.0602	2.0252	2.1234			1.56	4.05617	2.0873
	1.643	4.05617	2.0626	2.0663	2.0278	2.0942			1.568	4.05617	2.0835
	1.651	4.05617	2.0498	2.0804	2.0288	2.093			1.576	4.05617	2.0619
	1.659	4.05617	2.0564	2.0298	1.9978	2.1005			1.585	4.05617	2.0291
	1.668	4.05617	2.0667	2.0485	2.0253	2.0955			1.593	4.05617	2.0524
	1.675	4.05617	2.0317	2.0587	2.0162	2.0525			1.602	4.05617	2.0597
	1.684	4.05617	2.0422	2.0536	1.9953	2.1414			1.61	4.05617	2.0767
	1.692	4.05617	2.0166	2.0544	2.0207	2.1029			1.618	4.05617	2.0663
	1.701	4.05617	2.0433	2.0594	2.0247	2.0429			1.627	4.05617	2.0634
	1.71	4.05617	2.0583	2.0511	2.0265	2.0976			1.635	4.05617	2.0694
	1.717	4.05617	2.0409	2.0606	2.0373	2.0946			1.643	4.05617	2.0593
	1.726	4.05617	2.0353	2.0388	2.036	2.0978			1.652	4.05617	2.0652
	1.734	4.05617	2.0352	2.0646	2.0006	2.1042			1.66	4.05617	2.062
	1.743	4.05617	2.0684	2.0443	2.0156	2.0929			1.668	4.05617	2.0521
	1.751	4.05617	2.0591	2.0513	2.0019	2.0755			1.677	4.05617	2.0322
	1.76	4.05617	2.055	2.0571	2.0042	2.1114			1.685	4.05617	2.0358
	1.768	4.05617	2.0427	2.0229	2.0081	2.0856			1.693	4.05617	2.0271
	1.776	4.05617	2.0381	2.0542	1.9987	2.0866			1.702	4.05617	2.0315
	1.783	4.05617	2.0505	2.0293	2.0293	2.126			1.71	4.05617	2.0794
	1.793	4.05617	2.0315	2.0519	2.0043	2.1089			1.72	4.05617	2.0879
	1.801	4.05617	2.0299	2.0585	2.0054	2.1149			1.727	4.05617	2.028
	1.809	4.05617	2.0176	2.0529	2.0171	2.0868			1.735	4.05617	2.0528
	1.818	4.05617	2.041	2.064	2.03	2.0557			1.743	4.05617	2.05
	1.826	4.05617	2.0498	2.0569	2.0066	2.0864			1.752	4.05617	2.0872
	1.833	4.05617	2.0897	2.0697	2.0217	2.12			1.76	4.05617	2.069
	1.843	4.05617	2.095	2.0778	1.9926	2.0929			1.768	4.05617	2.0611
	1.851	4.05617	2.0678	2.0387	2.0154	2.104			1.777	4.05617	2.0451
	1.859	4.05617	2.0462	2.022	2.0126	2.097			1.785	4.05617	2.0669
	1.868	4.05617	2.0264	2.0417	2.0145	2.0635			1.793	4.05617	2.0451
	1.876	4.05617	2.0535	2.017	2.007	2.126			1.801	4.05617	2.0155
	1.883	4.05617	2.0528	2.0545	1.9854	2.1141			1.81	4.05617	2.0462
	1.892	4.05617	2.0339	2.0265	2.0163	2.1115			1.818	4.05617	2.0576
	1.901	4.05617	2.0286	2.0495	2.018	2.0938			1.826	4.05617	2.0352
	1.909	4.05617	2.0429	2.0728	1.9977	2.0711			1.835	4.05617	2.0353
	1.918	4.05617	2.037	2.0345	1.995	2.1239			1.843	4.05617	2.0556
	1.926	4.05617	2.0609	2.0239	2.0068	2.076			1.851	4.05617	2.0285
	1.933	4.05617	2.0374	2.0441	2.0106	2.0924			1.86	4.05617	2.0473
	1.942	4.05617	2.0609	2.0527	2.0132	2.124			1.868	4.05617	2.0321
	1.951	4.05617	2.0644	2.0288	2.002	2.097			1.876	4.05617	2.0316
	1.959	4.05617	2.0526	2.0431	2.014	2.0888			1.885	4.05617	2.0256
	1.967	4.05617	2.0276	2.0616	2.0154	2.0965			1.893	4.05617	2.0317
	1.976	4.05617	2.0525	2.0747	2.0339	2.1008			1.901	4.05617	2.0298
	1.984	4.05617	2.0467	2.0448	1.9924	2.1244			1.91	4.05617	2.0176
	1.992	4.05617	2.0523	2.0669	1.9874	2.1091			1.918	4.05617	2.0129
	2	4.05617	2.0622	2.0239	1.9993	2.1014			1.926	4.05617	2.024
	2.009	4.05617	2.0462	2.058	2.0135	2.1159			1.935	4.05617	2.0631
	2.017	4.05617	2.0528	2.0603	1.9849	2.118			1.943	4.05617	2.0575
	2.026	4.05617	2.0611	2.0494	1.9966	2.1026			1.951	4.05617	2.0398
	2.034	4.05617	2.0414	2.0624	2.0177	2.0973			1.96	4.05617	2.0336
	2.042	4.05617	2.0351	2.0423	2.0102	2.1232			1.968	4.05617	2.0258
	2.051	4.05617	2.0558	2.0692	2.0168	2.0712			1.977	4.05617	2.0353
	2.06	4.05617	2.0307	2.038	2.0033	2.0825			1.985	4.05617	2.0456
	2.068	4.05617	2.0591	2.0637	2.0098	2.1061			1.993	4.05617	2.0271
	2.076	4.05617	2.0293	2.0546	2.0111	2.1335			2.001	4.05617	1.9932
	2.084	4.05617	2.0266	2.0314	2.0053	2.1342			2.01	4.05617	2.0366
	2.092	4.05617	2.0659	2.0386	1.9891	2.0811			2.018	4.05617	2.029
	2.1	4.05617	2.0319	2.0483	2.0205	2.0895			2.027	4.05617	2.0265
	2.109	4.05617	2.0227	2.0377	2.0162	2.0653			2.035	4.05617	2.0138
	2.117	4.05617	2.0544	2.0708	2.0092	2.1198			2.043	4.05617	2.0104
	2.126	4.05617	2.0654	2.0285	1.9865	2.118			2.051	4.05617	2.0312
	2.134	4.05617	2.0736	2.0641	1.9937	2.0848			2.06	4.05617	2.0511
	2.142	4.05617	2.0459	2.0704	1.994	2.136			2.068	4.05617	2.0138
	2.151	4.05617	2.0232	2.046	2.0146	2.0882			2.077	4.05617	2.0481
	2.159	4.05617	2.0735	2.0659	2.0233	2.0771			2.085	4.05617	2.0482
	2.167	4.05617	2.0598	2.0648	2.0347	2.1173			2.093	4.05617	2.0178
	2.176	4.05617	2.0544	2.0444	2.0275	2.0945			2.101	4.05617	2.0708
	2.184	4.05617	2.0419	2.0801	1.9972	2.0994			2.11	4.05617	2.0244
	2.192	4.05617	2.0408	2.0685	2.0352	2.0879			2.118	4.05617	2.0327
	2.201	4.05617	2.0225	2.0493	2.0163	2.0892			2.126	4.05617	2.0278
	2.21	4.05617	2.0263	2.0493	2.0094	2.0715			2.135	4.05617	2.0131
	2.218	4.05617	2.0436	2.0685	2.0132	2.0995			2.143	4.05617	2.062
	2.226	4.05617	2.0621	2.0686	2.0149	2.0563			2.151	4.05617	2.0604
	2.234	4.05617	2.0737	2.0555	2.0257	2.1028			2.16	4.05617	2.0532
	2.242	4.05617	2.0385	2.0579	2.0401	2.0687			2.168	4.05617	2.0303
	2.251	4.05617	2.0456	2.0305	2.0238	2.0681			2.176	4.05617	2.0293
	2.259	4.05617	2.033	2.0362	2.0119	2.084			2.185	4.05617	2.037
	2.268	4.05617	2.0559	2.0322	2.0225	2.0771			2.193	4.05617	2.0147
	2.276	4.05617	2.0353	2.0532	2.0145	2.0805			2.201	4.05617	2.0551
	2.284	4.05617	2.0425	2.0793	2.018	2.0996			2.21	4.05617	2.0512
	2.292	4.05617	2.0238	2.0525	2.0163	2.0959			2.218	4.05617	2.0339
	2.3	4.05617	2.0248	2.0343	2.0293	2.0659			2.226	4.05617	2.0248
	2.309	4.05617	2.0348	2.0748	2.0029	2.0635			2.235	4.05617	2.0628
	2.317	4.05617	2.0575	2.0565	2.0203	2.0808			2.243	4.05617	2.0172
	2.326	4.05617	2.0467	2.0555	1.9961	2.1033			2.251	4.05617	2.0133
	2.334	4.05617	2.0571	2.0485	2.0491	2.0967			2.26	4.05617	2.0583
	2.343	4.05617	2.0472	2.0379	2.0144	2.0879			2.27	4.05617	2.0118
	2.35	4.05617	2.0222	2.0409	2.031	2.1155			2.276	4.05617	2.0244
	2.359	4.05617	2.041	2.0494	2.0156	2.0925			2.285	4.05617	2.0281
	2.367	4.05617	2.0294	2.0542	2.0265	2.1038			2.293	4.05617	2.0318
	2.376	4.05617	2.0579	2.0599	2.017	2.0818			2.302	4.05617	2.0783
	2.383	4.05617	2.0469	2.0792	2.0085	2.1226			2.31	4.05617	2.0524
	2.393	4.05617	2.0507	2.0436	1.999	2.0566			2.318	4.05617	2.0398
	2.4	4.05617	2.0381	2.0431	2.0366	2.1075			2.326	4.05617	2.0348
	2.409	4.05617	2.021	2.0603	2.0256	2.1073			2.335	4.05617	2.0368
	2.418	4.05617	2.0479	2.0662	2.0238	2.1457			2.343	4.05617	1.998
	2.426	4.05617	2.0651	2.049	2.0083	2.1213			2.351	4.05617	2.0411
	2.434	4.05617	2.0754	2.0238	2.0155	2.1309			2.36	4.05617	2.0198
	2.442	4.05617	2.0473	2.0739	2.0231	2.0562			2.368	4.05617	2.0209
	2.45	4.05617	2.0442	2.044	2.025	2.0781			2.376	4.05617	2.0305
	2.459	4.05617	2.0543	2.0544	1.9924	2.1194			2.385	4.05617	2.0299
	2.467	4.05617	2.0417	2.0576	2.037	2.0967			2.393	4.05617	2.0635
	2.476	4.05617	2.0349	2.0629	2.0021	2.0991			2.401	4.05617	2.0394
	2.484	4.05617	2.0653	2.0536	2.0238	2.1009			2.41	4.05617	2.0417
	2.493	4.05617	2.048	2.0527	2.003	2.0953			2.418	4.05617	2.0253
	2.5	4.05617	2.0539	2.0975	2.0142	2.1092			2.426	4.05617	2.0329
	2.509	4.05617	2.0674	2.0817	1.9888	2.0963			2.435	4.05617	2.0447
	2.518	4.05617	2.0546	2.0599	2.014	2.055			2.443	4.05617	2.0437
	2.526	4.05617	2.0561	2.0564	2.0291	2.1053			2.451	4.05617	2.0227
	2.534	4.05617	2.0609	2.054	2.0263	2.1274			2.46	4.05617	2.0348
	2.543	4.05617	2.0399	2.0696	2.0109	2.1235			2.468	4.05617	2.0501
	2.55	4.05617	2.0153	2.0596	2.0242	2.1139			2.476	4.05617	2.0546
	2.559	4.05617	2.0207	2.0554	2.0189	2.1009			2.485	4.05617	2.0416
	2.567	4.05617	2.0605	2.0382	2.0185	2.1268			2.493	4.05617	2.019
	2.576	4.05617	2.0308	2.0528	2.0218	2.1064			2.501	4.05617	2.0964
	2.584	4.05617	2.0575	2.0453	2.0244	2.0869			2.51	4.05617	2.0523
	2.593	4.05617	2.0475	2.0523	2.025	2.1052			2.518	4.05617	2.0454
	2.601	4.05617	2.0573	2.0158	2.0094	2.1372			2.526	4.05617	2.0584
	2.608	4.05617	2.0505	2.0556	2.0376	2.1101			2.535	4.05617	2.0088
	2.618	4.05617	2.0518	2.0626	1.9937	2.088			2.543	4.05617	2.0535
	2.626	4.05617	2.0495	2.0667	2.0135	2.0923			2.551	4.05617	2.0255
	2.634	4.05617	2.0212	2.0586	1.9881	2.0883			2.56	4.05617	2.0551
	2.642	4.05617	2.0517	2.0624	1.9918	2.1013			2.568	4.05617	2.0552
	2.651	4.05617	2.0224	2.0511	2.0167	2.0919			2.576	4.05617	2.0175
	2.658	4.05617	2.0363	2.0634	1.9894	2.061			2.585	4.05617	2.0296
	2.667	4.05617	2.0453	2.0336	2.002	2.1184			2.593	4.05617	2.0536
	2.676	4.05617	2.0413	2.0662	2.0022	2.1019			2.601	4.05617	2.0645
	2.684	4.05617	2.0382	2.0304	2.0126	2.11			2.61	4.05617	2.0785
	2.692	4.05617	2.0148	2.0546	2.0013	2.0724			2.618	4.05617	2.0389
	2.701	4.05617	2.0546	2.0163	2.0132	2.061			2.626	4.05617	2.0638
	2.708	4.05617	2.0389	2.0421	1.9995	2.0667			2.635	4.05617	1.993
	2.717	4.05617	2.0446	2.0687	2.0199	2.0772			2.643	4.05617	2.0159
	2.726	4.05617	2.0373	2.0513	2.0185	2.1138			2.651	4.05617	2.0436
	2.733	4.05617	2.0273	2.0619	2.0392	2.1203			2.66	4.05617	2.0683
	2.742	4.05617	2.0376	2.0663	2.0268	2.1158			2.668	4.05617	2.006
	2.751	4.05617	2.035	2.0548	2.0031	2.0955			2.676	4.05617	2.0458
	2.758	4.05617	2.0305	2.0771	1.9735	2.0464			2.685	4.05617	2.0558
	2.767	4.05617	2.0098	2.0581	2.0195	2.1141			2.693	4.05617	1.9931
	2.775	4.05617	2.0369	2.0669	2.0177	2.1146			2.701	4.05617	2.0373
	2.784	4.05617	1.9974	2.0332	2.0224	2.1218			2.71	4.05617	2.0368
	2.793	4.05617	2.0451	2.0196	2.0203	2.0977			2.718	4.05617	2.0465
	2.801	4.05617	2.039	2.0204	2.0267	2.0902			2.726	4.05617	2.0206
	2.808	4.05617	2.0517	2.0556	2.0376	2.0931			2.735	4.05617	2.0108
	2.817	4.05617	2.0511	2.0734	2.0151	2.1273			2.743	4.05617	2.084
	2.825	4.05617	2.0228	2.0681	2.031	2.1295			2.751	4.05617	2.0024
	2.834	4.05617	2.0382	2.0598	1.9981	2.0994			2.76	4.05617	2.0187
	2.842	4.05617	2.049	2.0635	2.0322	2.0862			2.768	4.05617	2.0142
	2.851	4.05617	2.0433	2.0086	2.0351	2.1166			2.776	4.05617	2.0164
	2.858	4.05617	2.0509	2.0645	1.9918	2.1362			2.785	4.05617	2.0285
	2.867	4.05617	2.0275	2.0606	2.0201	2.1189			2.793	4.05617	2.0895
	2.876	4.05617	2.0411	2.0508	2.0055	2.1018			2.801	4.05617	2.0797
	2.884	4.05617	2.0464	2.073	2.001	2.1261			2.81	4.05617	2.0446
	2.892	4.05617	2.043	2.0692	1.9999	2.089			2.82	4.05617	2.034
	2.901	4.05617	2.0503	2.068	2.0184	2.056			2.826	4.05617	2.021
	2.909	4.05617	2.031	2.0489	2.0164	2.0754			2.835	4.05617	2.0008
	2.916	4.05617	2.0342	2.0414	2.034	2.1206			2.843	4.05617	2.0514
	2.926	4.05617	2.036	2.0579	2.0224	2.0958			2.851	4.05617	2.0728
	2.934	4.05617	2.0269	2.0539	1.9827	2.0726			2.86	4.05617	2.0788
	2.942	4.05617	2.0445	2.061	2.0334	2.1011			2.868	4.05617	2.0271
	2.951	4.05617	2.0075	2.0887	2.0079	2.134			2.876	4.05617	2.0497
	2.959	4.05617	2.0639	2.0528	1.9945	2.1018			2.884	4.05617	2.0521
	2.966	4.05617	2.0269	2.0657	2.0028	2.116			2.893	4.05617	2.033
	2.976	4.05617	2.0376	2.1016	2.0091	2.1254			2.901	4.05617	2.0367
	2.984	4.05617	2.0526	2.0527	1.993	2.0965			2.91	4.05617	2.0633
	2.993	4.05617	2.0407	2.0837	2.016	2.1061			2.918	4.05617	2.0496
	3.001	4.05617	2.0703	2.0853	2.0253	2.0426			2.926	4.05617	2.0299
	3.009	4.05617	2.0632	2.0731	2.0323	2.0961			2.934	4.05617	2.0246
	3.016	4.05617	2.0188	2.0565	2.0339	2.0928			2.943	4.05617	2.0323
	3.025	4.05617	2.0523	2.0739	2.0177	2.1301			2.951	4.05617	2.0276
	3.034	4.05617	2.0615	2.0598	2.0062	2.1007			2.96	4.05617	2.0263
	3.043	4.05617	2.0447	2.0549	2.0294	2.0804			2.968	4.05617	2.0245
	3.05	4.05617	2.0371	2.0412	2.0464	2.1046			2.976	4.05617	2.0737
	3.059	4.05617	2.0385	2.0651	2.0261	2.1165			2.984	4.05617	2.043
	3.066	4.05617	2.0338	2.038	2.0193	2.1221			2.993	4.05617	2.0395
	3.075	4.05617	2.0496	2.0674	2.0274	2.0322			3.001	4.05617	2.0033
	3.084	4.05617	2.018	2.0691	2.0114	2.0526			3.009	4.05617	2.0688
	3.093	4.05617	2.0631	2.0613	2.0093	2.1003			3.018	4.05617	2.0342
	3.1	4.05617	2.0393	2.071	1.9887	2.1026			3.026	4.05617	2.0226
	3.109	4.05617	2.0453	2.057	2.0347	2.0665			3.034	4.05617	2.0251
	3.116	4.05617	2.0524	2.029	2.0189	2.0925			3.043	4.05617	2.0543
	3.126	4.05617	2.0519	2.0708	2.0227	2.0819			3.051	4.05617	2.0523
	3.133	4.05617	2.0439	2.0178	2.0108	2.0571			3.06	4.05617	2.0471
	3.142	4.05617	2.0307	2.0561	2.0147	2.1319			3.068	4.05617	2.0667
	3.151	4.05617	2.0421	2.0539	2.0235	2.1176			3.076	4.05617	2.0285
	3.159	4.05617	2.0669	2.0761	2.0308	2.1182			3.084	4.05617	2.0499
	3.167	4.05617	2.0303	2.0711	2.0304	2.1342			3.093	4.05617	2.0262
	3.175	4.05617	2.0675	2.0683	1.9933	2.0474			3.101	4.05617	2.0214
	3.184	4.05617	2.0612	2.0646	2.0351	2.1114			3.109	4.05617	2.042
	3.193	4.05617	2.0361	2.0684	1.9835	2.0742			3.118	4.05617	2.0768
	3.201	4.05617	2.0281	2.0668	2.0038	2.0948			3.126	4.05617	2.0265
	3.209	4.05617	2.0783	2.0709	2.0061	2.0868			3.134	4.05617	2.0505
	3.216	4.05617	2.0455	2.055	2.0001	2.0604			3.143	4.05617	2.0381
	3.226	4.05617	2.0119	2.0415	2.022	2.1308			3.151	4.05617	1.9926
	3.234	4.05617	2.022	2.0486	2.0279	2.1095			3.159	4.05617	2.0025
	3.242	4.05617	2.0529	2.0864	2.0083	2.108			3.168	4.05617	2.0232
	3.251	4.05617	2.0469	2.07	2.0179	2.0646			3.176	4.05617	2.0535
	3.259	4.05617	2.0564	2.067	2.01	2.0936			3.184	4.05617	2.0184
	3.266	4.05617	2.0468	2.0336	2.004	2.078			3.193	4.05617	2.0029
	3.276	4.05617	2.0469	2.0543	1.9925	2.1177			3.201	4.05617	2.0198
	3.283	4.05617	2.0243	2.0598	1.9815	2.1024			3.209	4.05617	2.0168
	3.292	4.05617	2.0559	2.0338	1.984	2.0876			3.218	4.05617	2.032
	3.301	4.05617	2.0296	2.0106	2.0294	2.0902			3.226	4.05617	2.0173
	3.309	4.05617	2.0561	2.0558	2.0145	2.1044			3.235	4.05617	2.0357
	3.318	4.05617	2.0626	2.0698	2.0058	2.1026			3.243	4.05617	2.0244
	3.325	4.05617	2.0454	2.0686	2.0405	2.1308			3.251	4.05617	2.0521
	3.334	4.05617	2.0387	2.0737	2.0051	2.1343			3.267	4.05617	2.0238
	3.341	4.05617	2.0262	2.0723	2.0239	2.0964			3.27	4.05617	2.0548
	3.35	4.05617	2.0251	2.0652	1.9934	2.1081			3.277	4.05617	2.0718
	3.359	4.05617	2.0395	2.0608	2.0241	2.0916			3.284	4.05617	2.0283
	3.367	4.05617	2.0551	2.0315	2.0012	2.0806			3.293	4.05617	2.0669
	3.375	4.05617	2.0365	2.0643	2.0148	2.1401			3.301	4.05617	2.045
	3.383	4.05617	2.0468	2.0786	2.0089	2.1486			3.309	4.05617	2.0698
	3.392	4.05617	2.0255	2.0795	2.0001	2.108			3.318	4.05617	2.0165
	3.401	4.05617	2.0257	2.0676	2.0298	2.1646			3.326	4.05617	2.029
	3.408	4.05617	2.0632	2.0816	2.0377	2.1113			3.334	4.05617	2.0114
	3.417	4.05617	2.0265	2.0823	2.0274	2.0861			3.343	4.05617	2.066
	3.425	4.05617	2.0568	2.0554	2.0157	2.1093			3.351	4.05617	2.0281
	3.434	4.05617	2.048	2.0679	2.0181	2.0893			3.359	4.05617	2.0546
	3.442	4.05617	2.0563	2.0409	2.0366	2.0942			3.368	4.05617	2.0142
	3.451	4.05617	2.028	2.0288	2.0212	2.0686			3.376	4.05617	2.0105
	3.458	4.05617	2.0443	2.0717	2.0173	2.1021			3.384	4.05617	2.016
	3.467	4.05617	2.0486	2.0644	2.0436	2.1059			3.393	4.05617	2.021
	3.474	4.05617	2.0472	2.0737	2.0048	2.0958			3.401	4.05617	2.0378
	3.483	4.05617	2.0289	2.0727	2.0082	2.1078			3.409	4.05617	2.025
	3.491	4.05617	2.0513	2.0571	2.0492	2.1165			3.418	4.05617	2.054
	3.501	4.05617	2.0355	2.0684	2.0228	2.1178			3.426	4.05617	2.0198
	3.509	4.05617	2.0392	2.0702	2.0239	2.1175			3.434	4.05617	2.0472
	3.517	4.05617	2.0208	2.0494	2.0155	2.0939			3.443	4.05617	2.0282
	3.524	4.05617	2.025	2.0536	2.0242	2.1019			3.453	4.05617	2.0196
	3.534	4.05617	2.045	2.0462	2.0213	2.1197			3.459	4.05617	2.0171
	3.542	4.05617	2.0379	2.0363	2.0457	2.1336			3.468	4.05617	2.0333
	3.55	4.05617	2.0205	2.0411	2.0322	2.094			3.476	4.05617	2.0747
	3.559	4.05617	2.0466	2.057	2.0094	2.1179			3.484	4.05617	2.0754
	3.566	4.05617	2.0471	2.0294	2.0403	2.0797			3.493	4.05617	2.043
	3.575	4.05617	2.0428	2.0587	2.0056	2.1234			3.501	4.05617	2.028
	3.583	4.05617	2.0396	2.0577	2.0204	2.0687			3.509	4.05617	2.0385
	3.592	4.05617	2.0426	2.0406	2.0055	2.1031			3.518	4.05617	2.0546
	3.6	4.05617	2.0232	2.0574	2.0016	2.0794			3.526	4.05617	2.0244
	3.608	4.05617	2.0467	2.0729	2.0164	2.0956			3.534	4.05617	2.0531
	3.617	4.05617	2.0696	2.068	2.0174	2.0908			3.543	4.05617	2.0669
	3.626	4.05617	2.029	2.0333	1.9964	2.1066			3.551	4.05617	2.0964
	3.633	4.05617	2.0208	2.0492	2.0106	2.0821			3.559	4.05617	2.0322
	3.642	4.05617	2.0525	2.0672	2.0136	2.092			3.568	4.05617	2.0446
	3.65	4.05617	2.0322	2.0684	2.0075	2.0806			3.576	4.05617	2.0479
	3.659	4.05617	2.0384	2.0427	2.0233	2.0941			3.584	4.05617	2.0616
	3.667	4.05617	2.0413	2.0525	2.0332	2.0991			3.593	4.05617	2.0799
	3.675	4.05617	2.0569	2.0657	2.005	2.1125			3.601	4.05617	2.0176
	3.683	4.05617	2.0308	2.0487	2.0089	2.0894			3.609	4.05617	2.0219
	3.692	4.05617	2.0502	2.084	1.9995	2.1396			3.618	4.05617	2.0185
	3.7	4.05617	2.046	2.0724	1.9966	2.051			3.626	4.05617	2.0195
	3.709	4.05617	2.0235	2.0446	2.0223	2.1146			3.634	4.05617	2.0402
	3.717	4.05617	2.0314	2.0756	1.9841	2.1451			3.645	4.05617	2.0297
	3.726	4.05617	2.0598	2.0816	2.0068	2.0876			3.651	4.05617	2.0854
	3.733	4.05617	2.0449	2.0726	2.0009	2.0825			3.659	4.05617	2.0249
	3.742	4.05617	2.0498	2.064	1.9938	2.0799			3.668	4.05617	2.0435
	3.75	4.05617	2.0509	2.0553	1.9772	2.0773			3.676	4.05617	2.0188
	3.759	4.05617	2.0309	2.0683	2.0024	2.1171			3.684	4.05617	2.0514
	3.767	4.05617	2.0527	2.0861	2.0185	2.1199			3.693	4.05617	2.0556
	3.775	4.05617	2.0349	2.0813	1.9972	2.0791			3.701	4.05617	2.0238
	3.784	4.05617	2.0538	2.0535	2.0027	2.1287			3.709	4.05617	2.0311
	3.791	4.05617	2.0703	2.0668	2.0225	2.1126			3.718	4.05617	2.0313
	3.8	4.05617	2.0302	2.0769	2.0185	2.1243			3.726	4.05617	2.0275
	3.809	4.05617	2.0348	2.0895	2.0035	2.0964			3.734	4.05617	2.0313
	3.818	4.05617	2.0426	2.0443	2.0213	2.1156			3.743	4.05617	2.0684
	3.825	4.05617	2.0324	2.0634	2.0084	2.128			3.751	4.05617	2.0599
	3.834	4.05617	2.0496	2.0498	2.0194	2.1022			3.759	4.05617	2.0507
	3.841	4.05617	2.0529	2.0369	1.9879	2.0697			3.768	4.05617	2.0083
	3.85	4.05617	2.0345	2.0537	2.025	2.1075			3.776	4.05617	2.0127
	3.859	4.05617	2.0338	2.049	1.9894	2.0744			3.784	4.05617	2.0473
	3.868	4.05617	2.0411	2.0518	2.0291	2.0773			3.793	4.05617	2.0405
	3.875	4.05617	2.0363	2.0714	2.0213	2.0601			3.801	4.05617	2.0406
	3.884	4.05617	2.0529	2.0684	1.9948	2.1365			3.809	4.05617	2.0191
	3.891	4.05617	2.0408	2.06	2.0075	2.1419			3.818	4.05617	2.0602
	3.9	4.05617	2.0292	2.035	2.0124	2.1021			3.826	4.05617	2.0538
	3.909	4.05617	2.029	2.0536	2.0018	2.1094			3.834	4.05617	2.0447
	3.917	4.05617	2.0378	2.0724	1.9961	2.0866			3.843	4.05617	2.0031
	3.925	4.05617	2.0485	2.0375	2	2.1008			3.851	4.05617	2.0226
	3.934	4.05617	2.0446	2.0716	2.0231	2.0903			3.859	4.05617	2.0525
	3.941	4.05617	2.026	2.0435	2.0147	2.0944			3.868	4.05617	2.0519
	3.95	4.05617	2.0492	2.0433	1.9865	2.0726			3.876	4.05617	1.9878
	3.959	4.05617	2.0497	2.0371	2.0243	2.1272			3.884	4.05617	2.0175
	3.967	4.05617	2.023	2.0568	2.0212	2.0865			3.893	4.05617	2.0417
	3.975	4.05617	2.0096	2.0529	2.0133	2.1028			3.901	4.05617	2.0569
	3.984	4.05617	2.0036	2.0611	2.0206	2.1121			3.909	4.05617	2.0195
	3.991	4.05617	2.041	2.0695	2.019	2.1272			3.918	4.05617	2.0212
	3.999	4.05617	2.0534	2.0594	2.0068	2.1204			3.926	4.05617	2.0728
	4.009	4.05617	2.0717	2.0666	2.004	2.1075			3.934	4.05617	2.0224
	4.017	4.05617	2.0085	2.0308	2.0212	2.0783			3.943	4.05617	2.0154
	4.026	4.05617	2.0104	2.044	2.0136	2.1546			3.951	4.05617	2.0031
	4.034	4.05617	2.0617	2.065	1.9978	2.1252			3.959	4.05617	2.0129
	4.041	4.05617	2.0481	2.0459	2.012	2.0704			3.968	4.05617	2.0083
	4.05	4.05617	2.0305	2.0563	2.021	2.0866			3.976	4.05617	2.0575
	4.059	4.05617	2.0275	2.0605	2.0264	2.1028			3.984	4.05617	2.0348
	4.067	4.05617	2.0221	2.0765	2.0155	2.1342			3.993	4.05617	2.0493
	4.076	4.05617	2.0271	2.0645	1.9986	2.1159			4.001	4.05617	1.9919
	4.084	4.05617	2.0426	2.0557	2.011	2.1118			4.009	4.05617	2.0315
	4.091	4.05617	2.0272	2.0468	2.0146	2.1059			4.017	4.05617	2.0438
	4.1	4.05617	2.0277	2.0758	2.0118	2.1048			4.026	4.05617	2.0301
	4.109	4.05617	2.0121	2.0122	1.9962	2.119			4.034	4.05617	2.0548
	4.117	4.05617	2.0506	2.0666	2.0339	2.1205			4.043	4.05617	2.0058
	4.125	4.05617	2.0477	2.0661	2.0517	2.1295			4.051	4.05617	2.0608
	4.134	4.05617	2.0402	2.0628	2.0185	2.0762			4.059	4.05617	2.0543
	4.142	4.05617	2.0284	2.0468	2.0246	2.1209			4.067	4.05617	2.0328
	4.149	4.05617	2.0346	2.0755	2.0206	2.1224			4.076	4.05617	2.0179
	4.159	4.05617	2.0556	2.0392	2.0364	2.1265			4.085	4.05617	2.0401
	4.167	4.05617	2.0503	2.0576	2.0186	2.1008			4.093	4.05617	2.0604
	4.175	4.05617	2.0485	2.0325	1.9963	2.1064			4.101	4.05617	2.0418
	4.184	4.05617	2.0391	2.0665	2.0289	2.0885			4.109	4.05617	2.033
	4.192	4.05617	2.0595	2.054	2.0084	2.1266			4.118	4.05617	2.0428
	4.199	4.05617	2.0359	2.0617	2.0016	2.1096			4.126	4.05617	2.0407
	4.209	4.05617	2.068	2.0431	2.014	2.0943			4.134	4.05617	2.0159
	4.217	4.05617	2.0668	2.0249	2.0038	2.0828			4.142	4.05617	2.0796
	4.225	4.05617	2.0522	2.0403	2.0232	2.0998			4.151	4.05617	2.036
	4.234	4.05617	2.0433	2.0398	2.033	2.1194			4.159	4.05617	2.0515
	4.242	4.05617	2.0223	2.044	2.017	2.0767			4.167	4.05617	2.0872
	4.251	4.05617	2.016	2.0726	2.0044	2.093			4.176	4.05617	2.0187
	4.258	4.05617	2.0319	2.0648	2.0209	2.1108			4.184	4.05617	2.0525
	4.267	4.05617	2.039	2.0667	2.0148	2.117			4.192	4.05617	2.0337
	4.275	4.05617	2.0378	2.0635	2.0172	2.0981			4.201	4.05617	2.073
	4.283	4.05617	2.0366	2.0763	2.0112	2.0709			4.209	4.05617	2.0523
	4.292	4.05617	2.0475	2.0851	1.9868	2.1364			4.218	4.05617	2.0601
	4.301	4.05617	2.0482	2.0646	1.9919	2.0725			4.226	4.05617	2.0258
	4.309	4.05617	2.0405	2.0706	2.0166	2.0846			4.234	4.05617	1.9783
	4.318	4.05617	2.0157	2.0574	2.0294	2.0966			4.242	4.05617	2.01
	4.325	4.05617	2.0426	2.0425	2.025	2.1063			4.251	4.05617	2.0302
	4.333	4.05617	2.0604	2.0782	2.0171	2.0884			4.259	4.05617	2.0621
	4.341	4.05617	2.049	2.0381	2.0222	2.1001			4.267	4.05617	2.0169
	4.35	4.05617	2.0161	2.0624	1.9947	2.0924			4.276	4.05617	1.997
	4.358	4.05617	2.031	2.0797	2.0133	2.0675			4.284	4.05617	1.9963
	4.367	4.05617	2.0453	2.0522	2.0059	2.1026			4.292	4.05617	2.0329
	4.375	4.05617	2.0269	2.0638	2.0376	2.1044			4.301	4.05617	2.0364
	4.383	4.05617	2.0511	2.0454	2.0213	2.1123			4.309	4.05617	2.0295
	4.392	4.05617	2.0322	2.035	2.0051	2.1223			4.317	4.05617	2.0433
	4.4	4.05617	2.0339	2.0461	2.0319	2.1231			4.326	4.05617	2.0767
	4.408	4.05617	2.043	2.0305	2.0331	2.1072			4.334	4.05617	2.018
	4.417	4.05617	2.0631	2.0664	2.0198	2.0978			4.342	4.05617	2.0521
	4.425	4.05617	2.063	2.0376	2.0251	2.0986			4.351	4.05617	2.0247
	4.433	4.05617	2.0497	2.0503	2.0101	2.1013			4.359	4.05617	2.0168
	4.442	4.05617	2.0331	2.075	2.0337	2.1145			4.367	4.05617	2.0217
	4.45	4.05617	2.0193	2.033	1.9992	2.0976			4.376	4.05617	2.0454
	4.458	4.05617	2.0307	2.007	2.001	2.1213			4.384	4.05617	2.0696
	4.467	4.05617	2.0414	2.0684	2.0304	2.123			4.393	4.05617	2.0832
	4.474	4.05617	2.015	2.0604	2.0018	2.0967			4.401	4.05617	2.0938
	4.484	4.05617	2.0565	2.0438	2.0128	2.1236			4.409	4.05617	2.0442
	4.492	4.05617	2.0534	2.0764	2.0218	2.1276			4.418	4.05617	2.0557
	4.5	4.05617	2.0548	2.0476	2.0086	2.1009			4.426	4.05617	2.027
	4.508	4.05617	2.033	2.0613	2.006	2.1293			4.434	4.05617	2.0635
	4.517	4.05617	2.0287	2.0634	1.9934	2.0864			4.442	4.05617	2.0344
	4.525	4.05617	2.0609	2.0555	2.0207	2.1365			4.451	4.05617	2.0263
	4.533	4.05617	2.0418	2.0422	2.0253	2.1179			4.459	4.05617	2.0659
	4.542	4.05617	2.0607	2.049	2.0119	2.0738			4.467	4.05617	1.9924
	4.55	4.05617	2.0044	2.0662	2.0321	2.1074			4.476	4.05617	2.0505
	4.558	4.05617	2.0653	2.0541	2.0167	2.1264			4.484	4.05617	2.0572
	4.567	4.05617	2.0294	2.0523	2.0203	2.1005			4.492	4.05617	2.0053
	4.575	4.05617	2.0479	2.069	2.0091	2.1152			4.501	4.05617	2.0352
	4.584	4.05617	2.048	2.0398	2.0286	2.1097			4.509	4.05617	2.0439
	4.592	4.05617	2.0315	2.0388	2.0045	2.078			4.518	4.05617	2.0604
	4.6	4.05617	2.0596	2.0408	2.016	2.1182			4.526	4.05617	2.0223
	4.609	4.05617	2.0415	2.0671	1.9993	2.1213			4.534	4.05617	2.0861
	4.616	4.05617	2.0197	2.0601	2.0256	2.0854			4.542	4.05617	2.0668
	4.625	4.05617	2.0622	2.0107	2.02	2.0754			4.551	4.05617	2.0464
	4.634	4.05617	2.0615	2.0414	1.9802	2.0982			4.559	4.05617	2.0584
	4.642	4.05617	2.0344	2.0675	1.9857	2.1432			4.567	4.05617	2.0606
	4.651	4.05617	2.0567	2.0164	2.0129	2.1186			4.576	4.05617	2.0559
	4.658	4.05617	2.0453	2.0665	1.9995	2.1253			4.584	4.05617	2.0592
	4.666	4.05617	2.0473	2.0484	2.0305	2.0948			4.592	4.05617	2.0466
	4.675	4.05617	2.0557	2.0573	2.0366	2.0949			4.601	4.05617	2.0319
	4.683	4.05617	2.0025	2.0602	2.0038	2.1234			4.609	4.05617	2.0283
	4.692	4.05617	2.0369	2.056	2.005	2.0683			4.617	4.05617	1.9966
	4.7	4.05617	2.0445	2.0489	2.0354	2.1436			4.626	4.05617	2.0351
	4.708	4.05617	2.0604	2.0637	1.9979	2.1099			4.635	4.05617	2.0863
	4.716	4.05617	2.036	2.0605	2.0059	2.1223			4.642	4.05617	2.0212
	4.725	4.05617	2.0263	2.0553	2.0165	2.0423			4.651	4.05617	2.0376
	4.734	4.05617	2.0372	2.0561	2.0344	2.1108			4.659	4.05617	2.0482
	4.742	4.05617	2.041	2.0506	2.0084	2.1273			4.667	4.05617	2.0109
	4.75	4.05617	2.0358	2.0504	2.0119	2.1016			4.676	4.05617	2.027
	4.758	4.05617	2.0435	2.05	2.0158	2.1002			4.684	4.05617	2.0467
	4.766	4.05617	2.0634	2.0691	2.0253	2.1061			4.692	4.05617	2.0804
	4.775	4.05617	2.0535	2.0353	2.0043	2.0949			4.701	4.05617	2.046
	4.784	4.05617	2.0281	2.0489	1.989	2.0922			4.709	4.05617	2.0387
	4.792	4.05617	2.0583	2.0595	2.013	2.0667			4.717	4.05617	2.0117
	4.799	4.05617	2.0556	2.0416	2.0162	2.0525			4.726	4.05617	2.0256
	4.808	4.05617	2.0117	2.0518	2.0117	2.1572			4.734	4.05617	1.999
	4.816	4.05617	2.0621	2.0647	2.008	2.0973			4.742	4.05617	2.0319
	4.825	4.05617	2.0654	2.0714	2.005	2.0915			4.751	4.05617	2.038
	4.832	4.05617	2.0363	2.0775	2.0127	2.0993			4.759	4.05617	2.0936
	4.842	4.05617	2.0548	2.0483	2.0317	2.113			4.767	4.05617	2.036
	4.85	4.05617	2.0309	2.0721	2.0372	2.1123			4.776	4.05617	2.0429
	4.859	4.05617	2.0525	2.0639	2.0208	2.0876			4.784	4.05617	2.0481
	4.866	4.05617	2.0131	2.0685	2.0164	2.1216			4.792	4.05617	2.0723
	4.875	4.05617	2.0221	2.0555	2.0205	2.096			4.801	4.05617	2.0321
	4.883	4.05617	2.0539	2.0369	2.0135	2.129			4.809	4.05617	2.0206
	4.891	4.05617	2.0445	2.0537	2.0206	2.0795			4.817	4.05617	2.0343
	4.9	4.05617	2.0557	2.056	2.0103	2.1293			4.826	4.05617	2.0823
	4.909	4.05617	2.0183	2.0356	2.0071	2.0856			4.834	4.05617	2.0249
	4.917	4.05617	2.0406	2.0694	2.0255	2.0668			4.842	4.05617	2.0308
	4.924	4.05617	2.0366	2.0546	2.0092	2.0988			4.851	4.05617	2.0507
	4.933	4.05617	2.0346	2.035	2.0126	2.1343			4.859	4.05617	2.0526
	4.942	4.05617	2.0512	2.0777	2.0071	2.1211			4.867	4.05617	2.0075
	4.949	4.05617	2.0583	2.0725	2.0319	2.0566			4.876	4.05617	2.069
	4.959	4.05617	2.0262	2.0593	2.0105	2.1047			4.884	4.05617	2.009
	4.967	4.05617	2.0585	2.0693	1.9984	2.0694			4.892	4.05617	2.0229
	4.974	4.05617	2.0331	2.0531	2.0071	2.0921			4.901	4.05617	2.049
	4.983	4.05617	2.0519	2.0531	2.0418	2.1331			4.909	4.05617	2.0654
	4.992	4.05617	2.0331	2.0403	1.9946	2.0571			4.917	4.05617	2.0095
	5	4.05617	2.021	2.0353	2.0142	2.093			4.926	4.05617	2.0355
	5.009	4.05617	2.0516	2.0397	2.0391	2.0858			4.934	4.05617	2.0559
	5.017	4.05617	2.0201	2.0483	2.0295	2.0988			4.942	4.05617	2.0687
	5.024	4.05617	2.0391	2.072	2.0064	2.1047			4.951	4.05617	2.0734
	5.034	4.05617	2.043	2.0691	2.0156	2.1116			4.959	4.05617	2.0979
	5.042	4.05617	2.0492	2.039	2.0358	2.0906			4.967	4.05617	2.0459
	5.05	4.05617	2.067	2.077	2.0038	2.1171			4.976	4.05617	2.0176
	5.058	4.05617	2.0402	2.0465	2.0063	2.1238			4.984	4.05617	2.0226
	5.067	4.05617	2.0424	2.0548	2.0309	2.0969			4.992	4.05617	2.0145
	5.074	4.05617	2.0549	2.0561	1.9991	2.1056			5.001	4.05617	2.0492
	5.083	4.05617	2.051	2.0304	2.0099	2.1261			5.009	4.05617	2.016
	5.092	4.05617	2.0331	2.0808	2.0377	2.1332			5.017	4.05617	2.0128
	5.1	4.05617	2.0327	2.0325	2.0195	2.1361			5.026	4.05617	2.0444
	5.109	4.05617	2.0215	2.0915	2.0105	2.0922			5.034	4.05617	2.0267
	5.117	4.05617	2.0657	2.0667	2.0285	2.118			5.042	4.05617	2.0341
	5.124	4.05617	2.0313	2.0833	2.0232	2.1			5.051	4.05617	2.0109
	5.133	4.05617	2.0617	2.0782	2.0156	2.1008			5.059	4.05617	2.0208
	5.142	4.05617	2.063	2.0728	2.0245	2.0839			5.067	4.05617	2.0121
	5.15	4.05617	2.0649	2.0726	2.0039	2.1178			5.076	4.05617	2.0219
	5.158	4.05617	2.0337	2.0874	2.0267	2.1453			5.084	4.05617	2.0034
	5.167	4.05617	2.0292	2.0525	2.0315	2.1178			5.092	4.05617	2.042
	5.174	4.05617	2.0458	2.069	2.028	2.107			5.101	4.05617	2.0267
	5.184	4.05617	2.0677	2.0401	2.0269	2.0889			5.109	4.05617	2.0516
	5.192	4.05617	2.0447	2.0343	2.02	2.0731			5.117	4.05617	2.0526
	5.2	4.05617	2.0414	2.0519	2.0287	2.0885			5.125	4.05617	2.0575
	5.207	4.05617	2.0499	2.0607	2.0043	2.096			5.134	4.05617	2.0512
	5.217	4.05617	2.028	2.0648	2.0027	2.0923			5.142	4.05617	2.0124
	5.224	4.05617	2.026	2.0494	2.0028	2.1263			5.151	4.05617	2.0569
	5.233	4.05617	2.0235	2.0138	2.0204	2.096			5.159	4.05617	2.0834
	5.242	4.05617	2.0368	2.079	1.999	2.1202			5.167	4.05617	2.0427
	5.25	4.05617	2.0609	2.0554	2.0044	2.1021			5.175	4.05617	2.0127
	5.258	4.05617	2.0573	2.0695	2.0052	2.1194			5.185	4.05617	2.012
	5.267	4.05617	2.036	2.0694	1.991	2.1411			5.192	4.05617	2.0127
	5.275	4.05617	2.0374	2.0735	2.0312	2.088			5.2	4.05617	2.0314
	5.282	4.05617	2.0309	2.0624	2.0257	2.0962			5.209	4.05617	2.0426
	5.291	4.05617	2.0652	2.0711	2.0002	2.0891			5.217	4.05617	2.0542
	5.3	4.05617	2.0383	2.069	1.9989	2.0833			5.226	4.05617	2.0319
	5.308	4.05617	2.0453	2.0718	2.0118	2.1213			5.234	4.05617	2.0422
	5.317	4.05617	2.044	2.0354	2.0055	2.0931			5.242	4.05617	2.0748
	5.325	4.05617	2.0581	2.0515	2.0181	2.1169			5.25	4.05617	2.0575
	5.332	4.05617	1.9979	2.065	2.0084	2.1146			5.259	4.05617	2.0465
	5.342	4.05617	2.0199	2.0558	2.0348	2.1156			5.267	4.05617	2.0471
	5.35	4.05617	2.0385	2.0607	1.9979	2.0826			5.276	4.05617	2.029
	5.358	4.05617	2.0277	2.054	2.0053	2.0744			5.284	4.05617	2.0097
	5.367	4.05617	2.0498	2.0539	2.0065	2.0863			5.292	4.05617	2.0194
	5.375	4.05617	2.0383	2.0667	2.0196	2.1164			5.301	4.05617	2.0431
	5.383	4.05617	2.0514	2.0463	2.0186	2.1322			5.309	4.05617	2.0438
	5.391	4.05617	2.0309	2.0702	2.0001	2.087			5.317	4.05617	2.03
	5.4	4.05617	2.0385	2.0551	1.9858	2.0679			5.325	4.05617	2.0553
	5.408	4.05617	2.0225	2.0605	2.0213	2.1079			5.334	4.05617	2.0335
	5.417	4.05617	2.0186	2.0586	2.011	2.1154			5.342	4.05617	2.0091
	5.425	4.05617	2.0093	2.0718	2.0215	2.1032			5.35	4.05617	2.0359
	5.432	4.05617	2.0575	2.0653	1.9859	2.1001			5.359	4.05617	2.0601
	5.442	4.05617	2.0338	2.0723	2.0063	2.103			5.367	4.05617	2.0843
	5.45	4.05617	2.0449	2.0508	2.0311	2.0889			5.375	4.05617	2.0498
	5.459	4.05617	2.0491	2.0756	2.0187	2.1316			5.384	4.05617	2.033
	5.467	4.05617	2.0678	2.0511	2.0247	2.131			5.392	4.05617	2.0826
	5.475	4.05617	2.0588	2.0492	2.0161	2.1192			5.4	4.05617	2.0875
	5.482	4.05617	2.0637	2.0634	2.0143	2.1242			5.409	4.05617	2.0429
	5.491	4.05617	2.0497	2.0594	2.0229	2.11			5.417	4.05617	2.0462
	5.5	4.05617	2.0636	2.0479	2.0157	2.1216			5.425	4.05617	2.0379
	5.508	4.05617	2.0597	2.0486	1.9989	2.1312			5.434	4.05617	2.0185
	5.517	4.05617	2.0412	2.0388	2.0252	2.0925			5.442	4.05617	2.0328
	5.525	4.05617	2.0299	2.0827	2.019	2.0865			5.45	4.05617	2.0211
	5.532	4.05617	2.0377	2.081	1.9964	2.1039			5.459	4.05617	2.0404
	5.542	4.05617	2.0412	2.0732	1.9997	2.0645			5.467	4.05617	2.0572
	5.55	4.05617	2.044	2.0705	2.0254	2.1019			5.476	4.05617	1.9968
	5.558	4.05617	2.0421	2.0747	2.007	2.0756			5.484	4.05617	2.0119
	5.567	4.05617	2.0335	2.0685	2.0266	2.1083			5.492	4.05617	2.0202
	5.575	4.05617	2.0396	2.0393	2.0067	2.0984			5.5	4.05617	2.0452
	5.583	4.05617	2.0282	2.046	2.0185	2.1218			5.509	4.05617	2.0423
	5.591	4.05617	1.9975	2.0713	1.997	2.0959			5.517	4.05617	1.9906
	5.599	4.05617	2.0321	2.0294	2.0303	2.102			5.525	4.05617	2.0286
	5.608	4.05617	2.0246	2.0159	2.0192	2.0973			5.534	4.05617	2.0203
	5.616	4.05617	2.0351	2.0484	2.0301	2.1117			5.542	4.05617	2.0427
	5.625	4.05617	2.0302	2.0668	2.0218	2.1018			5.55	4.05617	2.0169
	5.632	4.05617	2.0506	2.0809	1.9983	2.1114			5.559	4.05617	2.0683
	5.642	4.05617	2.0445	2.0554	2.0005	2.1053			5.567	4.05617	2.0721
	5.65	4.05617	2.0282	2.0535	2.0157	2.1157			5.575	4.05617	2.0473
	5.658	4.05617	2.0554	2.0678	2.0308	2.0885			5.584	4.05617	2.0669
	5.666	4.05617	2.0272	2.0621	2.0312	2.1122			5.592	4.05617	2.0447
	5.675	4.05617	2.0474	2.0724	2.0239	2.1284			5.6	4.05617	2.0448
	5.683	4.05617	2.0269	2.0445	1.9978	2.1282			5.609	4.05617	2.0414
	5.691	4.05617	2.042	2.066	1.9924	2.0974			5.618	4.05617	2.0252
	5.699	4.05617	2.0554	2.0838	2.0214	2.0832			5.626	4.05617	2.0683
	5.708	4.05617	2.0239	2.0807	2.0026	2.108			5.635	4.05617	2.0635
	5.717	4.05617	2.0237	2.0276	2.0315	2.0823			5.643	4.05617	2.0541
	5.725	4.05617	2.0521	2.0677	2.007	2.0752			5.651	4.05617	2.0469
	5.733	4.05617	2.047	2.0336	2.0484	2.0921			5.66	4.05617	2.0485
	5.741	4.05617	2.0558	2.0624	2.027	2.0478			5.668	4.05617	2.0652
	5.75	4.05617	2.0098	2.0683	2.0198	2.1053			5.676	4.05617	1.9881
	5.758	4.05617	2.0504	2.0631	2.014	2.1007			5.685	4.05617	2.0274
	5.766	4.05617	2.0673	2.0311	2.0188	2.073			5.693	4.05617	2.0844
	5.775	4.05617	2.0667	2.0626	2.01	2.0806			5.701	4.05617	2.0217
	5.783	4.05617	2.0585	2.0439	2.0249	2.1128			5.71	4.05617	2.035
	5.79	4.05617	2.0475	2.0405	2.0282	2.1164			5.718	4.05617	2.0196
	5.799	4.05617	2.0709	2.0354	2.0054	2.1027			5.727	4.05617	2.0043
	5.808	4.05617	2.0554	2.0509	2.0048	2.1237			5.736	4.05617	2.0481
	5.817	4.05617	2.0636	2.0293	2.0191	2.1455			5.743	4.05617	2.0445
	5.825	4.05617	2.0564	2.0216	2.0275	2.0865			5.751	4.05617	2.0401
	5.833	4.05617	2.0436	2.0404	2.0306	2.1486			5.76	4.05617	2.0603
	5.841	4.05617	2.034	2.0651	2.0001	2.1125			5.768	4.05617	2.065
	5.85	4.05617	2.0591	2.033	2.0367	2.1176			5.776	4.05617	2.0496
	5.858	4.05617	2.0594	2.077	2.0228	2.1198			5.785	4.05617	2.0623
	5.867	4.05617	2.07	2.0633	2.0239	2.0787			5.793	4.05617	2.0477
	5.875	4.05617	2.048	2.0639	2.018	2.0996			5.801	4.05617	1.9951
	5.883	4.05617	2.041	2.0005	2.0215	2.1156			5.81	4.05617	1.9774
	5.891	4.05617	2.0548	2.0659	1.9966	2.0894			5.818	4.05617	2.0426
	5.899	4.05617	2.0266	2.0661	2.0096	2.0903			5.826	4.05617	2.0009
	5.908	4.05617	2.0524	2.0643	2.0071	2.1227			5.835	4.05617	2.0169
	5.917	4.05617	2.0693	2.0789	2.0184	2.0698			5.843	4.05617	2.0097
	5.925	4.05617	2.0202	2.0416	1.9893	2.122			5.851	4.05617	2.0285
	5.933	4.05617	2.0258	2.0386	2.0322	2.1055			5.86	4.05617	2.0569
	5.941	4.05617	2.048	2.0492	2.028	2.0882			5.868	4.05617	2.0623
	5.949	4.05617	2.03	2.0386	2.0027	2.1296			5.876	4.05617	2.0408
	5.958	4.05617	2.0339	2.0737	1.9995	2.1056			5.885	4.05617	2.0545
	5.966	4.05617	2.0333	2.0557	2.0206	2.0909			5.893	4.05617	2.0155
	5.975	4.05617	1.9993	2.0358	2.0065	2.1027			5.901	4.05617	2.0248
	5.983	4.05617	2.0463	2.0691	2.0054	2.0707			5.91	4.05617	2.0283
	5.992	4.05617	1.9989	2.0773	1.9901	2.0987			5.918	4.05617	2.0265
	5.999	4.05617	2.0178	2.0654	2.0218	2.0795			5.926	4.05617	2.0182
	6.008	4.05617	2.0334	2.0841	2.0228	2.0738			5.935	4.05617	2.064
	6.017	4.05617	2.055	2.0644	1.9963	2.0971			5.943	4.05617	2.0761
	6.025	4.05617	2.0405	2.0286	1.99	2.082			5.951	4.05617	2.0779
	6.033	4.05617	2.0181	2.0439	2.0023	2.0755			5.96	4.05617	2.0793
	6.041	4.05617	2.044	2.026	2.0195	2.0897			5.968	4.05617	2.06
	6.049	4.05617	2.052	2.0651	2.0216	2.1064			5.976	4.05617	2.0615
	6.058	4.05617	2.0417	2.0868	2.0127	2.0872			5.985	4.05617	2.0573
	6.067	4.05617	2.0405	2.0816	2.0121	2.0798			5.993	4.05617	2.0577
	6.075	4.05617	2.023	2.0936	2.0023	2.0802			6.001	4.05617	2.0406
	6.083	4.05617	2.0185	2.056	2.0048	2.0513			6.01	4.05617	2.0572
	6.092	4.05617	2.0383	2.0676	2.0301	2.0771			6.018	4.05617	2.0019
	6.099	4.05617	2.0383	2.0455	2.0472	2.1279			6.026	4.05617	2.0499
	6.108	4.05617	2.0368	2.0752	2.0034	2.1366			6.035	4.05617	2.0627
	6.116	4.05617	2.0354	2.0797	1.993	2.1088			6.043	4.05617	2.0481
	6.125	4.05617	2.0407	2.0865	2.0178	2.1044			6.051	4.05617	2.0788
	6.133	4.05617	2	2.0282	2.0282	2.1059			6.06	4.05617	2.0412
	6.142	4.05617	2.0268	2.0601	2.0383	2.0693			6.068	4.05617	2.0171
	6.149	4.05617	2.0573	2.0637	2.0168	2.1337			6.076	4.05617	2.0096
	6.158	4.05617	2.0236	2.067	2.0238	2.1197			6.085	4.05617	2.0094
	6.167	4.05617	2.0274	2.0394	2.0411	2.1151			6.093	4.05617	2.0143
	6.174	4.05617	2.0061	2.0633	2.0151	2.0459			6.101	4.05617	2.0236
	6.183	4.05617	2.0187	2.0325	2.0335	2.0983			6.11	4.05617	2.0338
	6.191	4.05617	1.9993	2.0214	2.0134	2.136			6.118	4.05617	2.0262
	6.2	4.05617	2.0412	2.0521	2.0273	2.1301			6.126	4.05617	2.0457
	6.207	4.05617	2.0397	2.0909	2.0235	2.0802			6.135	4.05617	2.0554
	6.216	4.05617	2.0271	2.0811	1.9938	2.0916			6.143	4.05617	2.0597
	6.225	4.05617	2.0329	2.0483	2.0084	2.1048			6.151	4.05617	2.0419
	6.233	4.05617	2.0342	2.0714	2.0218	2.1267			6.16	4.05617	2.0257
	6.241	4.05617	2.0258	2.0656	2.0369	2.0886			6.168	4.05617	2.0149
	6.25	4.05617	2.0491	2.0762	2.0301	2.0782			6.176	4.05617	2.0548
	6.257	4.05617	2.0174	2.0436	2.0159	2.069			6.185	4.05617	2.0365
	6.266	4.05617	2.0489	2.0496	2.0109	2.0981			6.193	4.05617	2.0515
	6.275	4.05617	2.0208	2.0341	2.0066	2.0652			6.201	4.05617	2.0468
	6.283	4.05617	2.0618	2.0374	1.9839	2.0725			6.21	4.05617	2.0571
	6.291	4.05617	2.0124	2.0756	2.0182	2.0972			6.218	4.05617	2.0184
	6.3	4.05617	1.9866	2.0429	1.9875	2.083			6.226	4.05617	2.0506
	6.307	4.05617	2.0027	2.0622	2.0075	2.104			6.235	4.05617	2.037
	6.316	4.05617	2.0276	2.0569	1.987	2.1306			6.243	4.05617	2.0569
	6.324	4.05617	2.0591	2.0395	2.0262	2.1159			6.251	4.05617	2.0051
	6.333	4.05617	2.0328	2.0726	1.9934	2.0911			6.259	4.05617	2.0323
	6.342	4.05617	2.0154	2.0394	2.0137	2.131			6.268	4.05617	2.0528
	6.35	4.05617	2.0336	2.0377	2.0206	2.1199			6.276	4.05617	2.0951
	6.357	4.05617	2.037	2.0681	2.0227	2.0934			6.286	4.05617	2.0363
	6.366	4.05617	2.0464	2.0742	1.9998	2.0898			6.293	4.05617	2.0124
	6.374	4.05617	2.0446	2.0785	2.0057	2.0749			6.301	4.05617	2.0432
	6.383	4.05617	2.0472	2.0798	1.9915	2.0968			6.31	4.05617	2.0459
	6.392	4.05617	2.0441	2.0641	1.9883	2.113			6.318	4.05617	2.0434
	6.4	4.05617	2.0247	2.0465	2.0143	2.0733			6.326	4.05617	2.0274
	6.407	4.05617	2.0316	2.0457	2.0111	2.1228			6.335	4.05617	2.0428
	6.416	4.05617	2.0418	2.0321	2.0119	2.1216			6.343	4.05617	2.0286
	6.424	4.05617	2.0336	2.0333	2.0209	2.1296			6.351	4.05617	2.0534
	6.433	4.05617	2.0172	2.0418	2.0098	2.0859			6.359	4.05617	1.994
	6.441	4.05617	2.0561	2.0402	2.031	2.1077			6.368	4.05617	2.0298
	6.449	4.05617	2.0514	2.0229	2.0115	2.0966			6.376	4.05617	2.0364
	6.457	4.05617	2.0374	2.0367	2.0112	2.1214			6.384	4.05617	2.0464
	6.466	4.05617	2.0308	2.0337	2.0252	2.0763			6.393	4.05617	2.0465
	6.475	4.05617	2.0168	2.0556	2.026	2.0737			6.401	4.05617	2.0583
	6.483	4.05617	2.0453	2.0551	1.9842	2.1079			6.409	4.05617	2.0089
	6.492	4.05617	2.0591	2.0605	1.9893	2.1259			6.418	4.05617	2.0348
	6.5	4.05617	2.0467	2.0724	2.0069	2.1191			6.426	4.05617	2.0303
	6.508	4.05617	2.0242	2.0485	1.9967	2.1265			6.435	4.05617	2.0715
	6.515	4.05617	2.0504	2.0651	2.0361	2.1422			6.443	4.05617	2.029
	6.525	4.05617	2.0332	2.0468	2.025	2.0962			6.451	4.05617	2.0651
	6.533	4.05617	2.0493	2.0673	2.013	2.1017			6.459	4.05617	2.0163
	6.541	4.05617	2.0501	2.0626	2.0136	2.1102			6.468	4.05617	2.0198
	6.55	4.05617	2.0254	2.043	2.0207	2.0915			6.476	4.05617	2.0079
	6.558	4.05617	2.023	2.0564	2.0017	2.0797			6.485	4.05617	2.0108
	6.565	4.05617	2.0545	2.0437	2.022	2.0705			6.493	4.05617	2.0091
	6.575	4.05617	2.0212	2.0698	1.9758	2.0784			6.501	4.05617	2.0277
	6.583	4.05617	2.05	2.0574	1.9889	2.1117			6.509	4.05617	2.03
	6.591	4.05617	2.028	2.0522	2.0194	2.128			6.518	4.05617	2.0414
	6.599	4.05617	2.0608	2.0671	2.0103	2.105			6.526	4.05617	2.0224
	6.608	4.05617	2.0665	2.0691	2.0488	2.1024			6.534	4.05617	2.0351
	6.615	4.05617	2.0374	2.0914	2.0337	2.0867			6.543	4.05617	2.061
	6.624	4.05617	2.0444	2.0502	2.0424	2.1111			6.551	4.05617	2.0319
	6.633	4.05617	2.0506	2.0278	2.0223	2.0731			6.559	4.05617	2.052
	6.641	4.05617	2.0504	2.0361	2.0139	2.0634			6.568	4.05617	2.0599
	6.65	4.05617	2.0637	2.0474	2.0099	2.0808			6.576	4.05617	2.0632
	6.658	4.05617	2.025	2.058	2.0183	2.0942			6.584	4.05617	2.0469
	6.665	4.05617	2.0489	2.0479	2.0084	2.1227			6.593	4.05617	2.0196
	6.675	4.05617	2.0511	2.0464	2.0164	2.0975			6.601	4.05617	2.0479
	6.683	4.05617	2.0584	2.0535	2.0164	2.0913			6.609	4.05617	2.0308
	6.692	4.05617	2.0518	2.0721	2.0361	2.1095			6.618	4.05617	1.9982
	6.699	4.05617	2.0436	2.0467	2.0216	2.0584			6.626	4.05617	2.0575
	6.708	4.05617	2.0211	2.0538	2.0256	2.0812			6.634	4.05617	2.0494
	6.715	4.05617	2.0652	2.0478	2.023	2.1407			6.643	4.05617	2.053
	6.724	4.05617	2.0409	2.0704	2.0494	2.0843			6.651	4.05617	2.0417
	6.733	4.05617	2.0588	2.0599	2.0376	2.0467			6.659	4.05617	2.0141
	6.741	4.05617	2.0229	2.0597	2.0351	2.1017			6.668	4.05617	2.0205
	6.75	4.05617	2.0382	2.0333	2.0061	2.1032			6.676	4.05617	2.0542
	6.758	4.05617	2.0209	2.0559	1.9854	2.1128			6.684	4.05617	2.0637
	6.766	4.05617	2.0364	2.0585	2.0074	2.0754			6.693	4.05617	2.0208
	6.774	4.05617	2.0424	2.0461	2.0305	2.071			6.701	4.05617	2.0249
	6.783	4.05617	2.009	2.0624	2.0272	2.117			6.709	4.05617	2.0173
	6.791	4.05617	2.0563	2.0047	2.0237	2.1045			6.718	4.05617	2.0111
	6.799	4.05617	2.0319	2.0779	1.9964	2.034			6.726	4.05617	2.0346
	6.808	4.05617	1.9961	2.0494	2.0085	2.0839			6.734	4.05617	2.0346
	6.816	4.05617	2.0564	2.0736	2.0012	2.0675			6.743	4.05617	2.032
	6.824	4.05617	2.0382	2.0529	2.0036	2.0641			6.751	4.05617	2.0597
	6.833	4.05617	2.0342	2.0666	2.0189	2.1003			6.759	4.05617	2.0285
	6.841	4.05617	2.0471	2.0313	2.0242	2.0973			6.768	4.05617	2.0219
	6.85	4.05617	2.0779	2.0488	2.028	2.0703			6.776	4.05617	2.0375
	6.857	4.05617	2.0762	2.0545	2.042	2.1241			6.784	4.05617	1.9986
	6.866	4.05617	2.0188	2.07	2.0288	2.0758			6.793	4.05617	2.035
	6.873	4.05617	2.0371	2.0611	2.0152	2.0914			6.801	4.05617	2.07
	6.883	4.05617	2.0348	2.0617	2.0247	2.1137			6.809	4.05617	2.07
	6.892	4.05617	2.0361	2.0475	2.0058	2.1032			6.818	4.05617	2.0689
	6.899	4.05617	2.0453	2.0673	2.0263	2.0817			6.826	4.05617	2.0419
	6.908	4.05617	2.04	2.0669	2.0005	2.1139			6.836	4.05617	2.0457
	6.916	4.05617	2.019	2.0986	2.0133	2.0864			6.843	4.05617	2.0043
	6.924	4.05617	2.0247	2.0756	2.0257	2.1067			6.851	4.05617	2.0294
	6.933	4.05617	2.06	2.0484	2.0334	2.0594			6.859	4.05617	2.062
	6.941	4.05617	2.0015	2.0757	2.0182	2.1334			6.868	4.05617	2.0192
	6.95	4.05617	2.0446	2.0346	2.0208	2.1062			6.876	4.05617	2.0307
	6.958	4.05617	2.0481	2.0916	2.0173	2.1049			6.884	4.05617	2.0263
	6.966	4.05617	2.0535	2.06	2.017	2.0715			6.893	4.05617	2.0289
	6.974	4.05617	2.0642	2.0702	1.9909	2.1035			6.901	4.05617	2.026
	6.983	4.05617	2.0438	2.0321	2.0127	2.0765			6.909	4.05617	2.0171
	6.991	4.05617	2.0671	2.048	2.0249	2.0799			6.918	4.05617	2.0482
	6.999	4.05617	2.0506	2.0751	1.9989	2.0567			6.926	4.05617	2.0516
	7.008	4.05617	2.0497	2.0636	1.9824	2.0945			6.934	4.05617	2.0604
	7.016	4.05617	2.0539	2.0301	2.0271	2.0913			6.943	4.05617	2.0109
	7.024	4.05617	2.0733	2.039	2.0064	2.1438			6.951	4.05617	2.009
	7.032	4.05617	2.0549	2.0704	2.0492	2.0785			6.959	4.05617	2.0415
	7.041	4.05617	2.0415	2.0441	2.0249	2.0955			6.968	4.05617	2.068
	7.049	4.05617	2.0271	2.0211	2.0128	2.0963			6.976	4.05617	2.0435
	7.058	4.05617	2.0493	2.0469	2.0327	2.1236			6.984	4.05617	2.0141
	7.066	4.05617	2.0568	2.0784	2.0346	2.0792			6.993	4.05617	2.0264
	7.074	4.05617	2.0264	2.0595	2.0133	2.0872			7.001	4.05617	2.0565
	7.082	4.05617	2.0495	2.0688	2.0401	2.0907			7.009	4.05617	2.0439
	7.091	4.05617	2.0458	2.0391	2.0315	2.1105			7.018	4.05617	2.0672
	7.1	4.05617	2.0426	2.0565	2.0469	2.0894			7.026	4.05617	2.0041
	7.107	4.05617	2.0547	2.0696	2.0383	2.0886			7.034	4.05617	2.046
	7.116	4.05617	2.0496	2.0676	2.0252	2.067			7.043	4.05617	2.0526
	7.124	4.05617	2.059	2.0509	2.0364	2.1143			7.051	4.05617	2.031
	7.132	4.05617	2.0883	2.0818	2.0316	2.0779			7.059	4.05617	2.0523
	7.141	4.05617	2.0196	2.0522	2.0309	2.1225			7.068	4.05617	2.0454
	7.149	4.05617	2.0475	2.0158	2.0241	2.0875			7.076	4.05617	1.995
	7.158	4.05617	2.0487	2.0262	2.014	2.0661			7.084	4.05617	2.0455
	7.165	4.05617	2.0189	2.0494	2.0166	2.1256			7.093	4.05617	2.0653
	7.174	4.05617	2.0192	2.0422	2.0228	2.1239			7.101	4.05617	2.0447
	7.182	4.05617	2.0439	2.0339	2.017	2.1253			7.109	4.05617	2.0261
	7.191	4.05617	2.0573	2.0214	2.0288	2.0259			7.118	4.05617	2.0421
	7.199	4.05617	2.053	2.0565	2.0344	2.0716			7.126	4.05617	2.0576
	7.208	4.05617	2.0362	2.0343	2.0275	2.0698			7.134	4.05617	2.0211
	7.216	4.05617	2.04	2.0192	2.0181	2.1226			7.143	4.05617	2.0647
	7.224	4.05617	2.0771	2.0522	2.0034	2.0951			7.151	4.05617	2.0533
	7.232	4.05617	2.0471	2.0674	2.0492	2.143			7.159	4.05617	2.0371
	7.241	4.05617	2.0394	2.0748	2.0398	2.074			7.168	4.05617	2.0296
	7.249	4.05617	2.0387	2.0596	2.0422	2.093			7.176	4.05617	2.0532
	7.258	4.05617	2.0431	2.0297	2.0407	2.0563			7.184	4.05617	2.0482
	7.266	4.05617	2.0391	2.0532	2.0052	2.0935			7.193	4.05617	2.0658
	7.273	4.05617	2.0452	2.0766	2.02	2.1094			7.201	4.05617	1.9871
	7.283	4.05617	2.0307	2.0606	2.0382	2.1291			7.209	4.05617	1.99
	7.29	4.05617	2.0767	2.0715	2.0145	2.0908			7.218	4.05617	2.0237
	7.298	4.05617	2.0482	2.0664	2.0102	2.1082			7.226	4.05617	2.0558
	7.308	4.05617	2.05	2.0762	2.0332	2.1045			7.234	4.05617	2.0309
	7.315	4.05617	2.0428	2.0235	2.0208	2.0865			7.243	4.05617	2.0449
	7.324	4.05617	2.0352	2.0428	2.0164	2.079			7.251	4.05617	2.0542
	7.333	4.05617	2.0403	2.0379	2.0387	2.0875			7.259	4.05617	2.0392
	7.34	4.05617	2.0536	2.0306	2.0275	2.116			7.268	4.05617	2.0419
	7.35	4.05617	2.0371	2.028	2.0175	2.104			7.276	4.05617	2.0417
	7.358	4.05617	2.0298	2.0629	2.0345	2.1093			7.284	4.05617	2.0579
	7.365	4.05617	2.0177	2.0719	2.0302	2.1002			7.293	4.05617	2.0275
	7.374	4.05617	2.0414	2.075	2.03	2.074			7.301	4.05617	2.0468
	7.382	4.05617	2.0407	2.0349	2.0474	2.0452			7.309	4.05617	2.0678
	7.392	4.05617	2.019	2.0554	2.0122	2.088			7.318	4.05617	2.0998
	7.399	4.05617	2.0541	2.0575	2.0305	2.1061			7.326	4.05617	2.0605
	7.408	4.05617	2.0512	2.0963	2.0343	2.0955			7.334	4.05617	2.0375
	7.416	4.05617	2.0615	2.0481	2.0386	2.1111			7.343	4.05617	2.0675
	7.424	4.05617	2.06	2.0547	2.0449	2.1067			7.351	4.05617	2.0565
	7.433	4.05617	2.0492	2.0578	2.0223	2.0799			7.359	4.05617	2.0324
	7.44	4.05617	2.0428	2.0629	2.0078	2.0954			7.367	4.05617	2.0294
	7.449	4.05617	2.0272	2.0673	2.033	2.1027			7.376	4.05617	2.0657
	7.458	4.05617	2.0447	2.0565	2.0435	2.1226			7.386	4.05617	2.0795
	7.466	4.05617	2.0331	2.0536	2.0383	2.1132			7.393	4.05617	2.0754
	7.474	4.05617	2.0423	2.0043	2.0006	2.0925			7.401	4.05617	2.0661
	7.483	4.05617	2.0497	2.0312	2.0151	2.052			7.409	4.05617	2.0331
	7.491	4.05617	2.0205	2.0436	1.9974	2.0983			7.418	4.05617	2.036
	7.499	4.05617	2.0464	2.0584	2.0228	2.0645			7.426	4.05617	2.035
	7.508	4.05617	2.0472	2.0609	2.0297	2.0791			7.434	4.05617	2.0072
	7.516	4.05617	2.048	2.0852	2.0234	2.1012			7.443	4.05617	2.0546
	7.524	4.05617	2.0377	2.0684	2.0092	2.098			7.451	4.05617	2.0578
	7.532	4.05617	2.0416	2.0396	2.0252	2.1255			7.459	4.05617	2.0219
	7.541	4.05617	2.0427	2.0634	2.0238	2.1046			7.467	4.05617	2.0425
	7.549	4.05617	2.019	2.0218	1.9862	2.0992			7.476	4.05617	2.0537
	7.558	4.05617	2.0442	2.0813	2.021	2.0982			7.484	4.05617	2.0751
	7.566	4.05617	2.0392	2.0624	2.0273	2.0728			7.493	4.05617	2.0502
	7.574	4.05617	2.0452	2.0496	2.0293	2.0943			7.501	4.05617	2.0177
	7.583	4.05617	2.0254	2.0014	2.0341	2.1185			7.509	4.05617	1.9898
	7.591	4.05617	2.0471	2.0596	2.0133	2.0981			7.518	4.05617	1.9999
	7.598	4.05617	2.0507	2.0245	2.0481	2.0713			7.526	4.05617	2.0231
	7.608	4.05617	2.0506	2.0663	2.0153	2.1072			7.534	4.05617	2.0173
	7.616	4.05617	2.0192	2.0714	2.0114	2.1065			7.542	4.05617	2.0149
	7.624	4.05617	2.0603	2.0685	2.0419	2.1168			7.551	4.05617	2.035
	7.632	4.05617	2.0352	2.0586	2.0228	2.1288			7.559	4.05617	2.0066
	7.641	4.05617	2.0419	2.0646	2.0242	2.0884			7.567	4.05617	2.0184
	7.648	4.05617	2.0329	2.0644	2.0244	2.0335			7.576	4.05617	2.0098
	7.658	4.05617	2.0591	2.0403	2.0281	2.0878			7.584	4.05617	2.0723
	7.666	4.05617	2.0404	2.0695	2.0325	2.0748			7.592	4.05617	2.0261
	7.674	4.05617	2.0549	2.029	1.9994	2.0478			7.601	4.05617	2.0314
	7.683	4.05617	2.0426	2.0696	1.988	2.0972			7.609	4.05617	2.0214
	7.69	4.05617	2.0263	2.0587	1.998	2.0851			7.617	4.05617	2.0366
	7.699	4.05617	2.0524	2.0447	2.0094	2.0596			7.626	4.05617	2.0547
	7.708	4.05617	2.0615	2.0669	2.009	2.0704			7.634	4.05617	2.0542
	7.716	4.05617	2.0264	2.0834	2.0514	2.0949			7.642	4.05617	1.9997
	7.725	4.05617	2.0279	2.0692	2.0021	2.1272			7.651	4.05617	2.0138
	7.733	4.05617	2.0599	2.0495	2.0272	2.0986			7.659	4.05617	2.0074
	7.741	4.05617	2.0614	2.0932	2.0069	2.0724			7.667	4.05617	2.0622
	7.748	4.05617	2.0445	2.078	2.0269	2.1455			7.676	4.05617	2.0548
	7.757	4.05617	2.0272	2.0715	2.0329	2.0927			7.684	4.05617	2.0672
	7.766	4.05617	2.0311	2.0687	2.0081	2.0693			7.692	4.05617	2.0317
	7.774	4.05617	2.0184	2.0611	2.0281	2.1099			7.701	4.05617	2.0292
	7.782	4.05672	2.0715	2.0633	2.0145	2.122			7.709	4.05672	2.0217
	7.79	4.05672	2.0479	2.0402	2.0212	2.0825			7.717	4.05672	2.0626
	7.799	4.05672	2.0675	2.0746	1.9932	2.1023			7.726	4.05672	2.0339
	7.807	4.05672	2.0516	2.0425	2.0294	2.0849			7.734	4.05672	2.0397
	7.816	4.05672	2.0363	2.0646	2.0163	2.0803			7.742	4.05672	2.0402
	7.824	4.05672	2.0572	2.0412	2.0217	2.0886			7.751	4.05672	2.0246
	7.833	4.05672	2.0531	2.0685	2.0283	2.0826			7.759	4.05672	2.0088
	7.841	4.05672	2.0337	2.0461	2.0145	2.0845			7.767	4.05672	2.0238
	7.849	4.05672	2.0271	2.0395	2.0343	2.0956			7.776	4.05672	2.044
	7.857	4.05672	2.0389	2.0589	2.0293	2.1144			7.784	4.05672	2.0568
	7.866	4.05672	2.0578	2.0628	2.0129	2.0976			7.792	4.05672	2.0632
	7.874	4.05672	2.0567	2.0662	2.0254	2.0861			7.801	4.05672	2.0363
	7.882	4.05672	2.0597	2.0674	2.0224	2.0784			7.809	4.05672	2.026
	7.891	4.05672	2.05	2.0773	2.0264	2.0898			7.817	4.05672	2.0095
	7.898	4.05672	2.0642	2.0588	2.025	2.0877			7.826	4.05672	2.0166
	7.907	4.05672	2.048	2.0448	2.0173	2.1036			7.834	4.05672	2.0625
	7.916	4.05672	2.022	2.0466	2.0339	2.1093			7.842	4.05672	2.0792
	7.924	4.05672	2.0247	2.0298	2.0223	2.0787			7.851	4.05672	2.0314
	7.933	4.05672	2.041	2.0678	2.0382	2.0829			7.859	4.05672	2.0579
	7.94	4.05672	2.0479	2.0184	2.0373	2.0806			7.867	4.05672	2.0365
	7.949	4.05672	2.0521	2.0531	2.0301	2.0841			7.876	4.05672	2.0556
	7.957	4.05672	2.0603	2.0649	2.0158	2.0916			7.884	4.05672	2.0658
	7.966	4.05672	2.0489	2.0458	2.0039	2.0513			7.892	4.05672	2.077
	7.974	4.05672	2.0451	2.0514	2.0206	2.0982			7.901	4.05672	2.0334
	7.982	4.05672	2.0605	2.0682	1.9985	2.0939			7.909	4.05672	2.0276
	7.991	4.05672	2.0295	2.0809	2.0379	2.0955			7.917	4.05672	1.9947
	7.999	4.05672	2.058	2.0952	2.0275	2.1089			7.926	4.05672	2.0261
	8.007	4.05672	2.0731	2.0511	2.0307	2.0612			7.936	4.05672	1.9923
	8.016	4.05672	2.038	2.0426	2.0162	2.092			7.942	4.05672	2.0151
	8.025	4.05672	2.0604	2.0639	2.013	2.0915			7.951	4.05672	2.0545
	8.032	4.05672	2.0591	2.0662	2.0268	2.0769			7.959	4.05672	2.0857
	8.041	4.05672	2.0531	2.0353	2.0183	2.1			7.967	4.05672	2.0603
	8.049	4.05672	2.0426	2.0452	2.0052	2.055			7.976	4.05672	2.0084
	8.057	4.05672	2.0541	2.0259	1.9999	2.0543			7.984	4.05672	1.9793
	8.065	4.05672	2.0691	2.0573	2.0235	2.0613			7.992	4.05672	2.0458
	8.074	4.05672	2.0718	2.0411	2.0082	2.0945			8.001	4.05672	2.0181
	8.082	4.05672	2.0057	2.0474	2.0161	2.1428			8.009	4.05672	2.0059
	8.09	4.05672	2.0026	2.0572	2.0145	2.1327			8.017	4.05672	2.0742
	8.099	4.05672	2.0298	2.0451	2.0079	2.0829			8.026	4.05672	2.0917
	8.107	4.05672	2.0157	2.0444	1.9962	2.0667			8.034	4.05672	2.0512
	8.115	4.05672	2.0261	2.0286	2.0298	2.1052			8.042	4.05672	2.0633
	8.124	4.05672	2.0405	2.047	2.034	2.1241			8.051	4.05672	2.0487
	8.133	4.05672	2.0686	2.0434	2.0094	2.0816			8.059	4.05672	2.0455
	8.14	4.05672	2.0558	2.0732	2.013	2.0986			8.067	4.05672	2.0656
	8.149	4.05672	2.0391	2.0497	2.0422	2.103			8.076	4.05672	2.0064
	8.158	4.05672	2.0255	2.0499	2.0216	2.0992			8.084	4.05672	2.0238
	8.165	4.05672	2.0316	2.069	2.0308	2.12			8.092	4.05672	2.0391
	8.175	4.05672	2.0671	2.0477	1.9891	2.1044			8.101	4.05672	2.0271
	8.182	4.05672	2.0305	2.068	1.976	2.0751			8.109	4.05672	2.0346
	8.191	4.05672	2.0249	2.0586	2.0143	2.1008			8.117	4.05672	2.0206
	8.199	4.05672	2.0252	2.0563	2.0274	2.1073			8.126	4.05672	2.086
	8.208	4.05672	2.0611	2.0343	2.0344	2.0544			8.134	4.05672	2.0615
	8.215	4.05672	2.0333	2.0647	2.0344	2.0581			8.142	4.05672	2.0414
	8.224	4.05672	2.0098	2.0635	2.0276	2.1077			8.151	4.05672	2.0215
	8.232	4.05672	2.0441	2.0617	2.0295	2.1238			8.159	4.05672	2.0263
	8.241	4.05672	2.0465	2.0584	2.0257	2.0836			8.167	4.05672	2.0235
	8.249	4.05672	2.0442	2.0353	2.0158	2.1011			8.176	4.05672	2.0301
	8.257	4.05672	2.0351	2.0509	2.0207	2.0858			8.184	4.05672	2.0068
	8.265	4.05672	2.0785	2.0728	2.0237	2.1167			8.192	4.05672	1.996
	8.274	4.05672	2.0568	2.0772	2.008	2.1149			8.201	4.05672	2.0485
	8.283	4.05672	2.0302	2.0592	2.0161	2.114			8.209	4.05672	2.0676
	8.291	4.05672	2.0758	2.0729	2.0257	2.1046			8.217	4.05672	2.0089
	8.299	4.05672	2.0576	2.0382	2.0514	2.0966			8.226	4.05672	2.0376
	8.307	4.05672	2.0494	2.0448	2.0102	2.0968			8.234	4.05672	2.0377
	8.316	4.05672	2.0745	2.0347	2.0332	2.092			8.242	4.05672	2.0089
	8.324	4.05672	2.057	2.0613	2.0383	2.1192			8.251	4.05672	2.0086
	8.332	4.05672	2.067	2.0691	2.0279	2.1093			8.259	4.05672	1.9802
	8.341	4.05672	2.0394	2.0298	2.0298	2.0879			8.267	4.05672	2.0264
	8.349	4.05672	2.0355	2.0631	2.0082	2.0842			8.276	4.05672	2.0338
	8.358	4.05672	2.0449	2.0168	2.0038	2.1266			8.284	4.05672	2.0246
	8.365	4.05672	2.0534	2.0558	1.9951	2.1354			8.292	4.05672	2.0333
	8.374	4.05672	2.0451	2.0424	2.0178	2.1268			8.301	4.05672	2.0434
	8.383	4.05672	2.0611	2.0526	2.0318	2.1336			8.309	4.05672	2.068
	8.391	4.05672	2.0529	2.0716	2.0096	2.1072			8.317	4.05672	2.0631
	8.399	4.05672	2.0298	2.0616	2.0267	2.0766			8.326	4.05672	2.0404
	8.407	4.05672	2.0316	2.0492	2.0228	2.114			8.334	4.05672	2.0287
	8.416	4.05672	2.0277	2.0764	1.9953	2.1147			8.342	4.05672	2.0363
	8.423	4.05672	2.0148	2.0362	2.0235	2.1073			8.351	4.05672	2.0297
	8.432	4.05672	2.0406	2.0375	2.0241	2.1098			8.359	4.05672	2.0388
	8.441	4.05672	2.0285	2.0206	2.0246	2.1202			8.367	4.05672	2.0833
	8.449	4.05672	2.045	2.0507	2.0147	2.0911			8.376	4.05672	2.0682
	8.457	4.05672	2.034	2.0455	2.036	2.0881			8.384	4.05672	2.0667
	8.466	4.05672	2.0288	2.0582	2.0283	2.0976			8.392	4.05672	2.0717
	8.473	4.05672	2.0489	2.0786	2.0261	2.1052			8.401	4.05672	2.0354
	8.482	4.05672	2.0245	2.0472	2.0287	2.1129			8.409	4.05672	2.0659
	8.491	4.05672	2.0297	2.069	2.0312	2.0865			8.417	4.05672	2.0478
	8.499	4.05672	2.0499	2.0394	2.0203	2.0961			8.426	4.05672	2.0117
	8.507	4.05672	2.0602	2.0456	2.0022	2.0714			8.434	4.05672	2.0683
	8.516	4.05672	2.0181	2.0478	2.0133	2.0901			8.442	4.05672	2.0362
	8.523	4.05672	2.0271	2.0398	2.0018	2.0914			8.451	4.05672	2.0693
	8.532	4.05672	2.0502	2.0708	2.026	2.1475			8.459	4.05672	2.0738
	8.541	4.05672	2.0491	2.046	2.0167	2.0641			8.467	4.05672	2.0485
	8.549	4.05672	2.0598	2.0728	2.0008	2.0833			8.476	4.05672	2.0316
	8.557	4.05672	2.0626	2.0602	1.9927	2.0621			8.486	4.05672	2.0444
	8.566	4.05672	2.0576	2.0631	2.0192	2.0979			8.492	4.05672	2.0227
	8.573	4.05672	2.044	2.0508	2.0261	2.1186			8.501	4.05672	2.1
	8.582	4.05672	2.0365	2.0505	2.0204	2.0617			8.509	4.05672	2.0516
	8.591	4.05672	2.0384	2.0613	2.0173	2.0876			8.517	4.05672	2.0752
	8.599	4.05672	2.0539	2.0625	2.0133	2.0795			8.525	4.05672	2.0021
	8.607	4.05672	2.0057	2.0209	2.0269	2.1196			8.534	4.05672	2.0057
	8.616	4.05672	2.0086	2.0456	2.0158	2.12			8.542	4.05672	2.0369
	8.623	4.05672	2.0442	2.0673	2.007	2.0783			8.55	4.05672	2.0276
	8.632	4.05672	2.0406	2.052	1.9974	2.0422			8.559	4.05672	2.0481
	8.641	4.05672	2.0304	2.0591	2.0294	2.0802			8.567	4.05672	2.0661
	8.649	4.05672	2.0381	2.0747	2.0207	2.0876			8.576	4.05672	2.0445
	8.657	4.05672	2.0308	2.0272	2.03	2.0979			8.584	4.05672	2.0561
	8.666	4.05672	2.0556	2.0212	2.0248	2.093			8.592	4.05672	2.0077
	8.674	4.05672	2.0272	2.033	2.0182	2.0268			8.6	4.05672	2.0292
	8.681	4.05672	2.0405	2.0568	2.0215	2.0834			8.609	4.05672	2.0484
	8.69	4.05672	2.0589	2.0618	2.0148	2.1206			8.617	4.05672	2.0309
	8.699	4.05672	2.0424	2.0566	2.0042	2.0807			8.625	4.05672	2.0633
	8.707	4.05672	2.0398	2.0455	2.0297	2.1107			8.634	4.05672	2.0213
	8.716	4.05672	2.0349	2.0717	2.0045	2.1057			8.642	4.05672	2.0283
	8.724	4.05672	2.0453	2.0616	2.0235	2.0969			8.65	4.05672	2.0269
	8.732	4.05672	2.0023	2.0617	2.0169	2.1043			8.659	4.05672	2.0296
	8.741	4.05672	2.0307	2.0634	2.0109	2.1242			8.667	4.05672	2.0031
	8.749	4.05672	2.0237	2.0346	2.0119	2.0649			8.676	4.05672	2.0567
	8.757	4.05672	2.0202	2.0408	2.0346	2.1033			8.684	4.05672	2.0345
	8.766	4.05672	2.038	2.0516	2.0071	2.1079			8.692	4.05672	1.997
	8.774	4.05672	2.0267	2.0769	1.9881	2.0825			8.7	4.05672	2.0378
	8.781	4.05672	2.0367	2.0345	2.0058	2.093			8.709	4.05672	2.0339
	8.79	4.05672	2.0407	2.0496	2.015	2.0935			8.717	4.05672	2.0543
	8.799	4.05672	2.0581	2.0307	2.0086	2.1104			8.726	4.05672	2.0694
	8.807	4.05672	2.044	2.0706	2.0281	2.1183			8.734	4.05672	2.0557
	8.816	4.05672	2.0477	2.0557	1.9742	2.118			8.742	4.05672	2.078
	8.824	4.05672	2.0237	2.0694	2.0243	2.0968			8.751	4.05672	2.0403
	8.831	4.05672	2.039	2.0293	2.0151	2.0962			8.759	4.05672	2.0224
	8.84	4.05672	2.0089	2.0471	2.0152	2.0796			8.767	4.05672	2.0643
	8.849	4.05672	2.0674	2.0451	2.0407	2.1075			8.776	4.05672	2.0446
	8.858	4.05672	2.0497	2.0445	2.0165	2.1155			8.784	4.05672	2.051
	8.866	4.05672	2.0522	2.0135	2.0343	2.0923			8.792	4.05672	2.0163
	8.874	4.05672	2.048	2.055	2.0042	2.1133			8.8	4.05672	2.0343
	8.881	4.05672	2.0313	2.0722	2.0117	2.0905			8.809	4.05672	2.0332
	8.891	4.05672	2.0281	2.0755	2.0293	2.1021			8.817	4.05672	2.0408
	8.898	4.05672	2.0476	2.0524	2.0073	2.1016			8.825	4.05672	2.0439
	8.907	4.05672	2.059	2.0787	1.9992	2.0509			8.834	4.05672	2.0519
	8.916	4.05672	2.0395	2.0689	2.0212	2.073			8.842	4.05672	2.0616
	8.923	4.05672	2.0503	2.0514	2.0111	2.0826			8.85	4.05672	2.0092
	8.933	4.05672	1.9937	2.056	2.0388	2.0914			8.859	4.05672	2.024
	8.94	4.05672	1.9971	2.0187	2.0009	2.1102			8.867	4.05672	2.0341
	8.949	4.05672	2.0407	2.0382	2.0265	2.0989			8.875	4.05672	2.0503
	8.957	4.05672	2.0367	2.0276	2.0226	2.0846			8.884	4.05672	2.0744
	8.966	4.05672	2.0458	2.0596	1.9764	2.1132			8.892	4.05672	2.0416
	8.974	4.05672	2.0529	2.0482	2.0152	2.0834			8.901	4.05672	2.0247
	8.981	4.05672	2.0514	2.0518	2.0039	2.086			8.909	4.05672	2.0786
	8.99	4.05672	2.0121	2.0635	2.0356	2.0766			8.917	4.05672	2.0331
	8.999	4.05672	2.0382	2.0673	2.0088	2.0772			8.929	4.05672	2.0663
	9.007	4.05672	2.0191	2.0613	2.003	2.0743			8.934	4.05672	2.0284
	9.015	4.05672	2.0685	2.042	2.0317	2.0468			8.942	4.05672	2.029
	9.024	4.05672	2.0678	2.0387	2.0129	2.0693			8.95	4.05672	2.0601
	9.032	4.05672	2.0002	2.053	2.0289	2.083			8.959	4.05672	2.0435
	9.04	4.05672	2.0332	2.0141	2.008	2.0335			8.967	4.05672	2.0314
	9.049	4.05672	2.0804	2.0401	2.0228	2.0806			8.975	4.05672	2.0511
	9.057	4.05672	2.0446	2.079	2.022	2.092			8.984	4.05672	2.0619
	9.065	4.05672	2.0328	2.0862	1.9916	2.1017			8.992	4.05672	2.0536
	9.074	4.05672	2.0528	2.0423	2.0102	2.1209			9	4.05672	2.0409
	9.082	4.05672	2.0268	2.075	2.0183	2.105			9.009	4.05672	2.0363
	9.089	4.05672	2.0238	2.029	2.0219	2.1156			9.017	4.05672	2.0291
	9.098	4.05672	2.0384	2.0862	2.0229	2.1088			9.025	4.05672	2.0495
	9.107	4.05672	2.0286	2.0879	2.0247	2.0843			9.036	4.05672	2.0494
	9.116	4.05672	2.0316	2.0449	1.9977	2.0778			9.042	4.05672	2.0453
	9.124	4.05672	2.0377	2.0641	2.0011	2.0765			9.05	4.05672	2.0408
	9.132	4.05672	2.0468	2.1015	2.0181	2.1398			9.059	4.05672	2.0911
	9.14	4.05672	2.0424	2.0461	2.0152	2.1099			9.067	4.05672	2.0154
	9.149	4.05672	2.0391	2.0609	2.0304	2.043			9.075	4.05672	2.0021
	9.157	4.05672	2.0468	2.0564	1.9789	2.0735			9.084	4.05672	2.0336
	9.165	4.05672	2.0333	2.0127	2.0259	2.0719			9.092	4.05672	2.0367
	9.174	4.05672	2.0485	2.0647	2.0022	2.1262			9.1	4.05672	2.0007
	9.182	4.05672	2.0253	2.0472	2.0328	2.1127			9.109	4.05672	2.0219
	9.19	4.05672	2.0247	2.0175	2.0239	2.0693			9.117	4.05672	2.0365
	9.199	4.05672	2.0305	2.0384	2.006	2.0974			9.125	4.05672	2.0307
	9.207	4.05672	2.0489	2.0232	2.0144	2.0903			9.134	4.05672	2.0647
	9.215	4.05672	2.0258	2.023	1.9914	2.0846			9.142	4.05672	2.047
	9.224	4.05672	2.0309	2.0245	2.0264	2.1194			9.15	4.05672	2.0658
	9.232	4.05672	2.0296	2.0452	2.0002	2.0866			9.159	4.05672	2.041
	9.24	4.05672	2.0346	2.0517	2.0179	2.0764			9.167	4.05672	2.0599
	9.249	4.05672	2.0335	2.049	2.024	2.1277			9.175	4.05672	2.0558
	9.257	4.05672	2.032	2.064	2.0224	2.0701			9.184	4.05672	2.0759
	9.265	4.05672	2.0417	2.0339	2.0009	2.0778			9.192	4.05672	2.0346
	9.274	4.05672	2.0343	2.082	2.0274	2.0618			9.2	4.05672	2.0575
	9.282	4.05672	2.0387	2.0787	2.0449	2.0768			9.209	4.05672	2.0856
	9.29	4.05672	2.0388	2.057	2.0057	2.0983			9.217	4.05672	1.9978
	9.299	4.05672	2.0325	2.0306	1.9829	2.0964			9.225	4.05672	2.028
	9.306	4.05672	2.0528	2.0535	2.0307	2.0724			9.234	4.05672	2.045
	9.315	4.05672	2.0371	2.0507	2.0319	2.0994			9.242	4.05672	2.065
	9.324	4.05672	2.0678	2.0482	2.0459	2.0804			9.25	4.05672	2.0752
	9.332	4.05672	2.0371	2.0384	2.0315	2.08			9.258	4.05672	2.0317
	9.341	4.05672	2.0464	2.0614	2.0262	2.1141			9.267	4.05672	2.0877
	9.348	4.05672	2.0365	2.0656	2.0075	2.093			9.275	4.05672	2.0407
	9.357	4.05672	2.038	2.0832	1.991	2.0925			9.284	4.05672	2.0434
	9.366	4.05672	2.0246	2.0488	2.0178	2.0844			9.292	4.05672	2.0631
	9.374	4.05672	2.0643	2.0449	2.0212	2.0802			9.3	4.05672	2.0297
	9.382	4.05672	2.0576	2.0387	2.0423	2.1241			9.309	4.05672	2.0283
	9.39	4.05672	2.0454	2.0605	2.02	2.0836			9.317	4.05672	2.0126
	9.398	4.05672	2.0483	2.0621	2.0416	2.1455			9.325	4.05672	2.0362
	9.407	4.05672	2.0348	2.0539	2.0375	2.0936			9.334	4.05672	2.0727
	9.415	4.05672	2.0215	2.0397	2.0427	2.0432			9.342	4.05672	2.0285
	9.424	4.05672	2.0303	2.0863	2.0104	2.1401			9.35	4.05672	2.0363
	9.432	4.05672	2.0398	2.09	2.0096	2.0826			9.359	4.05672	2.0337
	9.44	4.05672	2.048	2.0707	2.024	2.0973			9.367	4.05672	2.0593
	9.449	4.05672	2.0678	2.0586	2.0037	2.1216			9.375	4.05672	2.0634
	9.457	4.05672	2.0454	2.08	2.0257	2.0996			9.384	4.05672	2.0307
	9.465	4.05672	2.0308	2.0809	2.0214	2.101			9.392	4.05672	2.0568
	9.474	4.05672	2.0453	2.0298	2.025	2.119			9.4	4.05672	2.0572
	9.481	4.05672	2.0536	2.0473	2.0053	2.0745			9.409	4.05672	2.0643
	9.491	4.05672	2.0306	2.0429	2.0104	2.1252			9.417	4.05672	2.0541
	9.498	4.05672	2.0316	2.0923	1.999	2.0933			9.425	4.05672	2.0397
	9.507	4.05672	2.0313	2.0638	2.0296	2.1037			9.434	4.05672	2.0636
	9.515	4.05672	2.0557	2.0445	2.0319	2.0865			9.442	4.05672	2.0961
	9.524	4.05672	2.0346	2.0636	2.0258	2.0717			9.45	4.05672	2.0128
	9.531	4.05672	2.0497	2.0683	2.0086	2.1029			9.459	4.05672	2.0342
	9.54	4.05672	2.0566	2.0244	2.0095	2.0808			9.467	4.05672	2.0494
	9.548	4.05672	2.0404	2.0844	2.0324	2.1146			9.476	4.05672	2.0793
	9.557	4.05672	2.0613	2.0373	2.0363	2.0742			9.484	4.05672	2.0559
	9.565	4.05672	2.0429	2.0625	2.0238	2.0436			9.492	4.05672	2.0563
	9.574	4.05672	2.0329	2.0548	2.0309	2.1459			9.5	4.05672	2.047
	9.582	4.05672	2.0282	2.0325	2.008	2.129			9.509	4.05672	2.0669
	9.591	4.05672	2.0377	2.034	2.0365	2.0991			9.517	4.05672	2.0581
	9.598	4.05672	2.0345	2.055	2.0276	2.118			9.525	4.05672	2.0417
	9.607	4.05672	2.0523	2.0467	2.0074	2.0707			9.534	4.05672	2.0333
	9.615	4.05672	2.0355	2.0618	2.0312	2.0616			9.542	4.05672	2.0313
	9.624	4.05672	2.036	2.0313	2.0169	2.0818			9.55	4.05672	2.0493
	9.631	4.05672	2.0499	2.0718	2.0276	2.1455			9.559	4.05672	2.0356
	9.64	4.05672	2.0252	2.082	2.0311	2.0668			9.567	4.05672	2.0637
	9.649	4.05672	2.0383	2.0409	2.0266	2.1142			9.575	4.05672	2.0096
	9.656	4.05672	2.0213	2.0539	2.0215	2.0798			9.584	4.05672	2.0349
	9.665	4.05672	2.0503	2.0672	2.0052	2.0713			9.592	4.05672	2.0339
	9.674	4.05672	2.0438	2.072	2.0195	2.0685			9.6	4.05672	2.0716
	9.682	4.05672	2.0347	2.0616	2.0548	2.0725			9.609	4.05672	2.0065
	9.69	4.05672	2.037	2.0486	2.0251	2.1127			9.617	4.05672	2.0508
	9.699	4.05672	2.0301	2.0641	2.0207	2.0871			9.625	4.05672	2.078
	9.706	4.05672	2.038	2.0515	2.0474	2.0895			9.634	4.05672	2.0485
	9.715	4.05672	2.008	2.0504	2.0099	2.1188			9.642	4.05672	2.0912
	9.724	4.05672	2.034	2.0601	2.0423	2.1075			9.65	4.05672	2.0816
	9.731	4.05672	2.0343	2.0302	2.036	2.0715			9.658	4.05672	2.0618
	9.74	4.05672	2.0394	2.0441	2.0116	2.0622			9.667	4.05672	2.0026
	9.749	4.05672	2.0294	2.0653	1.9966	2.1004			9.675	4.05672	2.0665
	9.756	4.05672	2.0442	2.0626	2.0317	2.103			9.684	4.05672	2.0714
	9.766	4.05672	2.0174	2.0325	2.0142	2.0938			9.692	4.05672	2.052
	9.774	4.05672	2.0408	2.0422	2.004	2.0867			9.7	4.05672	2.0532
	9.782	4.05672	2.0205	2.0134	2.0391	2.0838			9.709	4.05672	2.0841
	9.791	4.05672	2.0453	2.066	2.0222	2.0969			9.717	4.05672	2.0224
	9.798	4.05672	2.0426	2.0729	2.0406	2.0802			9.725	4.05672	2.0391
	9.807	4.05672	2.0501	2.0629	2.0334	2.1243			9.734	4.05672	2.0253
	9.815	4.05672	2.0227	2.0802	2.0385	2.0985			9.742	4.05672	2.0247
	9.824	4.05672	2.064	2.0589	2.0147	2.1114			9.75	4.05672	2.0648
	9.832	4.05672	2.0572	2.0562	2.028	2.0767			9.758	4.05672	2.0316
	9.84	4.05672	2.0658	2.0405	2.0171	2.0864			9.767	4.05672	2.042
	9.848	4.05672	2.0346	2.0416	2.02	2.0931			9.775	4.05672	2.0596
	9.857	4.05672	2.0431	2.0642	2.0401	2.124			9.783	4.05672	2.0061
	9.864	4.05672	2.0293	2.0621	2.028	2.0942			9.792	4.05672	2.0495
	9.873	4.05672	2.0296	2.0182	2.0037	2.0434			9.8	4.05672	2.0385
	9.882	4.05672	2.0545	2.0581	2.0195	2.0812			9.808	4.05672	2.0194
	9.89	4.05672	2.026	2.0896	2.0084	2.057			9.817	4.05672	2.049
	9.899	4.05672	2.0619	2.0666	2.0267	2.0843			9.825	4.05672	2.0242
	9.907	4.05672	2.0677	2.0773	2.0151	2.0859			9.833	4.05672	2.0381
	9.914	4.05672	2.0436	2.0739	2.0257	2.0534			9.842	4.05672	2.0465
	9.923	4.05672	2.047	2.0481	2.0074	2.1111			9.85	4.05672	2.0059
	9.932	4.05672	2.0416	2.0452	2.0138	2.0855			9.859	4.05672	2.0275
	9.94	4.05672	2.0419	2.0549	2.0271	2.0782			9.867	4.05672	2.0108
	9.949	4.05672	2.0288	2.0426	2.0331	2.1332			9.875	4.05672	2.0701
	9.957	4.05672	2.0158	2.0637	2.002	2.0974			9.883	4.05672	2.0597
	9.964	4.05672	2.0299	2.0508	2.015	2.1143			9.892	4.05672	2.0032
	9.973	4.05672	2.0551	2.0553	2.0149	2.1055			9.9	4.05672	2.0542
	9.982	4.05672	2.0218	2.0464	2.0289	2.1071			9.908	4.05672	2.0655
	9.99	4.05672	2.0448	2.064	1.9983	2.0606			9.917	4.05672	2.0681
	9.999	4.05672	2.0412	2.0486	2.0232	2.0708			9.925	4.05672	2.0491
	10.007	4.05672	2.0455	2.0401	2.0066	2.1204			9.933	4.05672	2.0712
	10.015	4.05672	2.0513	2.0698	2.003	2.0773			9.942	4.05672	2.0408
	10.024	4.05672	2.0273	2.07	2.0161	2.0682			9.95	4.05672	2.0144
	10.032	4.05672	2.0427	2.061	2.0333	2.0962			9.958	4.05672	2.0435
	10.041	4.05672	2.0716	2.0504	2.0233	2.1151			9.967	4.05672	2.0501
	10.049	4.05672	2.0398	2.0522	1.9981	2.095			9.975	4.05672	2.0408
	10.057	4.05672	2.0259	2.0726	2.0295	2.0583			9.983	4.05672	2.0233
	10.066	4.05672	2.0086	2.0534	2.0344	2.0738			9.992	4.05672	2.0552
	10.073	4.05672	2.0321	2.0683	2.0248	2.0741			10	4.05672	2.0149
	10.082	4.05672	2.0146	2.0728	2.0313	2.1018			10.008	4.05672	2.039
	10.09	4.05672	2.0335	2.0423	2.0161	2.0972			10.017	4.05672	2.0348
	10.099	4.05672	2.0502	2.0557	2.0173	2.1076			10.026	4.05672	2.0287
	10.107	4.05672	2.0451	2.0316	2.0287	2.1187			10.033	4.05672	2.0173
	10.115	4.05672	2.0319	2.05	2.0171	2.0457			10.042	4.05672	2.0389
	10.123	4.05672	2.0645	2.0605	2.0292	2.0557			10.05	4.05672	2.0879
	10.132	4.05672	2.0535	2.0447	2.0205	2.083			10.058	4.05672	2.0476
	10.14	4.05672	2.0479	2.0685	2.0403	2.0787			10.067	4.05672	2.0598
	10.149	4.05672	2.0429	2.053	2.042	2.0853			10.075	4.05672	2.0351
	10.157	4.05672	2.049	2.0287	2.0264	2.0922			10.083	4.05672	2.0597
	10.166	4.05672	2.076	2.0593	1.9996	2.0918			10.092	4.05672	2.0643
	10.173	4.05672	2.0343	2.0324	2.0121	2.1125			10.1	4.05672	2.0505
	10.182	4.05672	2.0378	2.0515	2.0122	2.0791			10.108	4.05672	2.0247
	10.19	4.05672	2.0422	2.0109	2.0158	2.1006			10.117	4.05672	2.0535
	10.199	4.05672	2.055	2.0499	2.0333	2.1153			10.125	4.05672	2.0551
	10.207	4.05672	2.0626	2.035	2.0412	2.035			10.133	4.05672	2.0781
	10.215	4.05672	2.0207	2.0748	2.0116	2.0943			10.142	4.05672	2.0455
	10.223	4.05672	2.0188	2.0397	2.0266	2.0955			10.15	4.05672	2.0311
	10.232	4.05672	2.0459	2.0316	2.0327	2.1015			10.158	4.05672	2.067
	10.241	4.05672	2.0227	2.0341	2.0307	2.103			10.167	4.05672	2.0238
	10.249	4.05672	2.0211	2.0579	2.0098	2.0787			10.175	4.05672	2.0458
	10.257	4.05672	2.0618	2.0705	2.0342	2.078			10.183	4.05672	2.0751
	10.265	4.05672	2.0471	2.0728	2.0273	2.0822			10.192	4.05672	2.045
	10.272	4.05672	2.0123	2.0632	2.03	2.0724			10.2	4.05672	2.0248
	10.282	4.05672	2.0294	2.0548	1.9953	2.1025			10.208	4.05672	2.0216
	10.29	4.05672	2.0301	2.0748	2.0132	2.1272			10.217	4.05672	2.0253
	10.299	4.05672	2.0521	2.0553	2.0002	2.1033			10.225	4.05672	2.0357
	10.307	4.05672	2.0311	2.0638	2.0074	2.1225			10.233	4.05672	2.0129
	10.315	4.05672	2.0526	2.0659	2.0419	2.0886			10.242	4.05672	2.0375
	10.323	4.05672	2.0611	2.0226	2.0155	2.086			10.25	4.05672	2.0076
	10.332	4.05672	2.0572	2.0872	2.0336	2.0855			10.258	4.05672	2.0379
	10.34	4.05672	2.0468	2.075	1.9966	2.0773			10.267	4.05672	2.0163
	10.348	4.05672	2.0419	2.0571	1.9986	2.0759			10.275	4.05672	2.0773
	10.357	4.05672	2.053	2.0485	1.9923	2.1011			10.283	4.05672	2.0413
	10.365	4.05672	2.0341	2.0571	2.0251	2.0596			10.292	4.05672	2.0356
	10.373	4.05672	2.028	2.0366	2.044	2.0478			10.3	4.05672	2.0291
	10.381	4.05672	2.0355	2.045	2.0194	2.0701			10.308	4.05672	2.0153
	10.389	4.05672	2.0744	2.0384	2.0186	2.0882			10.317	4.05672	2.0692
	10.398	4.05672	2.0396	2.0395	2.0195	2.042			10.325	4.05672	2.0179
	10.407	4.05672	2.0634	2.0481	2.0056	2.0722			10.333	4.05672	2.0536
	10.415	4.05672	2.0323	2.0484	2.0181	2.0635			10.342	4.05672	2.0601
	10.424	4.05672	2.0392	2.0657	2.0392	2.0763			10.35	4.05672	2.003
	10.431	4.05672	2.05	2.0291	1.9991	2.1248			10.358	4.05672	2.0363
	10.44	4.05672	2.0536	2.0638	2.0259	2.1214			10.367	4.05672	2.0504
	10.448	4.05672	2.0641	2.0543	2.0343	2.1142			10.375	4.05672	2.069
	10.457	4.05672	2.0466	2.0663	2.0204	2.0809			10.383	4.05672	2.0541
	10.465	4.05672	2.0228	2.0479	2.0228	2.098			10.392	4.05672	2.0315
	10.474	4.05672	2.046	2.0412	2.0244	2.1043			10.4	4.05672	2.0586
	10.481	4.05672	2.0619	2.0384	2.0147	2.0943			10.408	4.05672	2.0517
	10.491	4.05672	2.0547	2.0487	2.0266	2.0693			10.417	4.05672	2.019
	10.498	4.05672	2.0542	2.0522	2.0164	2.1052			10.425	4.05672	2.0506
	10.507	4.05672	2.0639	2.0703	2.0177	2.0547			10.433	4.05672	2.009
	10.515	4.05672	2.0538	2.0488	2.0227	2.0748			10.442	4.05672	2.0423
	10.523	4.05672	2.0539	2.0353	2.0156	2.0619			10.45	4.05672	1.9952
	10.531	4.05672	2.0607	2.0167	2.0051	2.1089			10.458	4.05672	2.0213
	10.54	4.05672	2.0734	2.0774	2.0085	2.0876			10.467	4.05672	2.0159
	10.549	4.05672	2.0627	2.0761	2.0109	2.0894			10.475	4.05672	2.0427
	10.557	4.05672	2.0267	2.0553	2.019	2.1155			10.483	4.05672	2.0257
	10.565	4.05672	2.0336	2.0543	1.9923	2.0815			10.492	4.05672	2.0584
	10.573	4.05672	2.066	2.0794	2.0167	2.0974			10.5	4.05672	2.0265
	10.581	4.05672	2.0221	2.0748	2.0311	2.0619			10.508	4.05672	2.0265
	10.59	4.05672	2.0619	2.0462	2.0348	2.0755			10.517	4.05672	2.0323
	10.598	4.05672	2.0566	2.0323	2.0179	2.0664			10.525	4.05672	2.0575
	10.607	4.05672	2.0226	2.0416	2.0155	2.11			10.533	4.05672	2.0892
	10.615	4.05672	2.0384	2.0263	2.0018	2.0753			10.542	4.05672	2.0669
	10.623	4.05672	2.0272	2.0263	1.997	2.0452			10.55	4.05672	2.069
	10.631	4.05672	2.0436	2.0134	2.0201	2.0454			10.558	4.05672	2.0511
	10.64	4.05672	2.0853	2.0699	2.0238	2.094			10.567	4.05672	2.007
	10.649	4.05672	2.0475	2.0469	2.0262	2.1051			10.576	4.05672	1.9786
	10.657	4.05672	2.0494	2.0661	2.039	2.1164			10.583	4.05672	2.0282
	10.665	4.05672	2.0574	2.0709	2.0174	2.0539			10.592	4.05672	2.0645
	10.673	4.05672	2.0506	2.0597	2.0229	2.0964			10.6	4.05672	2.0371
	10.682	4.05672	2.0601	2.0491	2.0014	2.0998			10.608	4.05672	2.0438
	10.689	4.05672	2.0339	2.0516	2.0299	2.0808			10.617	4.05672	2.0621
	10.698	4.05672	2.0514	2.042	2.0222	2.094			10.625	4.05672	2.0587
	10.707	4.05672	2.0384	2.0332	1.9955	2.0645			10.633	4.05672	2.0643
	10.715	4.05672	2.0657	2.0534	2.0282	2.1075			10.642	4.05672	2.0543
	10.723	4.05672	2.0696	2.0483	2.0114	2.1108			10.65	4.05672	2.0444
	10.732	4.05672	2.0212	2.0167	1.9907	2.0818			10.658	4.05672	2.0595
	10.739	4.05672	2.0436	2.0684	2.0025	2.0957			10.667	4.05672	2.06
	10.748	4.05672	2.0216	2.0525	2.0289	2.1243			10.675	4.05672	2.0405
	10.757	4.05672	2.0421	2.0783	2.0004	2.1239			10.683	4.05672	2.0028
	10.765	4.05672	2.0408	2.0557	2.0091	2.1114			10.691	4.05672	2.0587
	10.773	4.05672	2.0215	2.0215	2	2.1149			10.7	4.05672	2.0697
	10.782	4.05672	2.0145	2.0125	2.0044	2.0857			10.708	4.05672	2.0165
	10.789	4.05672	2.0252	2.0544	2.017	2.1575			10.717	4.05672	2.0401
	10.797	4.05672	2.0404	2.0441	2.0093	2.0983			10.725	4.05672	2.0542
	10.807	4.05672	2.0503	2.0306	2.0057	2.1026			10.733	4.05672	2.0717
	10.815	4.05672	2.0431	2.0279	2.009	2.1015			10.742	4.05672	2.0685
	10.823	4.05672	2.02	2.0653	1.9993	2.0876			10.75	4.05672	2.0619
	10.832	4.05672	2.0272	2.0437	1.9807	2.0824			10.758	4.05672	2.0535
	10.839	4.05672	2.0545	2.0656	2.0318	2.0729			10.766	4.05672	2.0447
	10.848	4.05672	2.0244	2.0266	1.9758	2.1132			10.775	4.05672	2.0354
	10.857	4.05672	2.0156	2.036	2.0074	2.1081			10.783	4.05672	2.0597
	10.865	4.05672	2.0519	2.0475	2.0067	2.0969			10.792	4.05672	2.0672
	10.873	4.05672	2.0417	2.0481	2.03	2.1009			10.8	4.05672	2.0464
	10.882	4.05672	2.0407	2.0393	1.9954	2.116			10.808	4.05672	2.0362
	10.889	4.05672	2.0361	2.0273	2.0094	2.1209			10.817	4.05672	2.0276
	10.897	4.05672	2.0385	2.0699	2.0198	2.0732			10.825	4.05672	2.053
	10.906	4.05672	2.0509	2.0673	2.0255	2.0774			10.833	4.05672	2.0271
	10.915	4.05672	2.0638	2.0548	2.0324	2.1282			10.842	4.05672	2.0253
	10.922	4.05672	2.0387	2.0765	2.0083	2.1009			10.85	4.05672	2.0139
	10.932	4.05672	2.0361	2.0477	2.0368	2.115			10.858	4.05672	2.0352
	10.94	4.05672	2.0386	2.0554	2.0022	2.1094			10.866	4.05672	2.069
	10.947	4.05672	2.0565	2.0566	2.0116	2.0739			10.875	4.05672	2.0107
	10.956	4.05672	2.0331	2.0691	2.0208	2.0824			10.883	4.05672	2.0354
	10.965	4.05672	2.0416	2.0671	2.019	2.1191			10.891	4.05672	2.0425
	10.973	4.05672	2.0501	2.0262	2.0186	2.1173			10.9	4.05672	2.0623
	10.982	4.05672	2.0324	2.0509	2.0158	2.0997			10.908	4.05672	2.0618
	10.991	4.05672	2.053	2.0529	2.0407	2.049			10.917	4.05672	2.042
	10.997	4.05672	2.0416	2.06	2.0183	2.0806			10.925	4.05672	2.0342
	11.007	4.05672	2.0299	2.0799	2.0214	2.1097			10.933	4.05672	2.0677
	11.015	4.05672	2.0546	2.0488	2.0443	2.0972			10.942	4.05672	2.0118
	11.023	4.05672	2.0464	2.0635	2.0255	2.1193			10.95	4.05672	2.0677
	11.031	4.05672	2.0275	2.0375	2.0044	2.0828			10.958	4.05672	2.0547
	11.04	4.05672	2.067	2.0486	2.0014	2.0926			10.966	4.05672	2.0351
	11.047	4.05672	2.0595	2.0467	2.0002	2.0871			10.975	4.05672	2.0384
	11.056	4.05672	2.032	2.0275	2.0192	2.1116			10.983	4.05672	2.0407
	11.065	4.05672	2.0258	2.0681	2.019	2.099			10.991	4.05672	2.0494
	11.073	4.05672	2.0485	2.0614	2.0309	2.0665			11	4.05672	2.0209
	11.082	4.05672	2.028	2.0571	2.0003	2.1063			11.008	4.05672	2.0059
	11.09	4.05672	2.0407	2.0787	2.0231	2.1191			11.016	4.05672	2.068
	11.097	4.05672	2.0569	2.0531	2.0267	2.122			11.025	4.05672	2.0703
	11.107	4.05672	2.035	2.0636	2.0143	2.1018			11.033	4.05672	2.0598
	11.115	4.05672	2.0384	2.0666	2.0209	2.081			11.042	4.05672	2.0616
	11.123	4.05672	2.032	2.0414	2.0112	2.0889			11.05	4.05672	2.0388
	11.132	4.05672	2.0452	2.0471	2.0154	2.0969			11.058	4.05672	2.0517
	11.14	4.05672	2.0397	2.0604	1.9943	2.0727			11.066	4.05672	2.019
	11.147	4.05672	2.0354	2.0756	1.988	2.1169			11.075	4.05672	2.0016
	11.156	4.05672	2.0485	2.0715	2.013	2.0942			11.083	4.05672	2.0234
	11.165	4.05672	2.0422	2.0768	2.0256	2.0988			11.092	4.05672	2.0495
	11.173	4.05672	2.0417	2.0575	1.9986	2.0733			11.1	4.05672	2.0787
	11.181	4.05672	2.0465	2.0241	2.0492	2.0724			11.108	4.05672	2.0702
	11.19	4.05672	2.0529	2.0632	1.9952	2.1035			11.116	4.05672	2.0541
	11.198	4.05672	2.0232	2.0764	1.9876	2.0632			11.126	4.05672	2.0382
	11.206	4.05672	2.0317	2.0577	2.0218	2.1121			11.133	4.05672	2.0343
	11.215	4.05672	2.0455	2.0554	1.9891	2.0995			11.141	4.05672	2.0336
	11.223	4.05672	2.0459	2.0443	1.9938	2.0852			11.15	4.05672	2.024
	11.231	4.05672	2.0356	2.0372	2.0351	2.1217			11.158	4.05672	2.0482
	11.24	4.05672	2.0253	2.0883	2.0066	2.0923			11.166	4.05672	2.0401
	11.248	4.05672	2.0452	2.066	2.0369	2.0719			11.175	4.05672	2.0334
	11.256	4.05672	2.0271	2.0841	2.0361	2.0752			11.183	4.05672	2.079
	11.265	4.05672	2.0432	2.0526	2.005	2.0856			11.191	4.05672	2.0671
	11.273	4.05672	2.0556	2.0145	1.9999	2.1003			11.2	4.05672	2.0617
	11.281	4.05672	2.0292	2.0431	2.0192	2.0917			11.208	4.05672	2.0325
	11.29	4.05672	2.0397	2.0693	2.0035	2.1246			11.216	4.05672	2.0333
	11.298	4.05672	2.0408	2.0355	2.0248	2.0929			11.225	4.05672	2.0466
	11.307	4.05672	2.0469	2.0421	2.0185	2.0732			11.233	4.05672	2.0702
	11.315	4.05672	2.0391	2.0784	2.0359	2.0956			11.241	4.05672	2.0405
	11.323	4.05672	2.0419	2.0484	2.0236	2.1046			11.25	4.05672	2.0163
	11.332	4.05672	2.0319	2.0512	2.017	2.1259			11.258	4.05672	2.0591
	11.34	4.05672	2.0523	2.0701	2.023	2.0895			11.266	4.05672	2.0377
	11.348	4.05672	2.022	2.0499	2.0084	2.1344			11.275	4.05672	2.0343
	11.356	4.05672	2.0415	2.0754	2.0091	2.1029			11.283	4.05672	2.0251
	11.365	4.05672	2.0093	2.0547	2.0314	2.084			11.291	4.05672	2.0674
	11.373	4.05672	2.0298	2.056	2.0333	2.1256			11.3	4.05672	2.0033
	11.381	4.05672	2.0411	2.0505	2.0015	2.0631			11.308	4.05672	2.0323
	11.39	4.05672	2.034	2.0518	1.9907	2.064			11.316	4.05672	2.0524
	11.398	4.05672	2.085	2.0423	1.9998	2.0817			11.325	4.05672	2.0062
	11.406	4.05672	2.0357	2.0529	2.0108	2.1171			11.333	4.05672	2.0656
	11.415	4.05672	2.0293	2.0424	2.022	2.0943			11.341	4.05672	2.0428
	11.423	4.05672	2.0761	2.0189	2.0324	2.0516			11.35	4.05672	2.0627
	11.431	4.05672	2.0469	2.0564	2.0236	2.0846			11.358	4.05672	2.0104
	11.44	4.05672	2.0504	2.0582	2.0209	2.1338			11.366	4.05672	2.0246
	11.448	4.05672	2.0253	2.0522	1.9989	2.137			11.375	4.05672	2.0583
	11.457	4.05672	2.04	2.0544	2.0439	2.1023			11.383	4.05672	2.0513
	11.464	4.05672	2.0429	2.0458	2.0154	2.077			11.391	4.05672	2.065
	11.473	4.05672	2.0558	2.059	2.0052	2.0992			11.4	4.05672	2.0672
	11.482	4.05672	2.0346	2.0694	2.0207	2.1219			11.408	4.05672	2.0659
	11.491	4.05672	2.0418	2.0711	2.028	2.1092			11.416	4.05672	2.0757
	11.497	4.05672	2.044	2.0157	2.0126	2.0987			11.425	4.05672	2.0726
	11.506	4.05672	2.046	2.0416	2.0188	2.1039			11.433	4.05672	2.0507
	11.514	4.05672	2.038	2.0128	2.0405	2.0783			11.441	4.05672	2.0662
	11.523	4.05672	2.0116	2.0069	2.0188	2.1216			11.45	4.05672	2.0604
	11.531	4.05672	2.0227	2.0594	2.0216	2.1112			11.458	4.05672	2.0314
	11.54	4.05672	2.0268	2.0499	2.0195	2.0951			11.466	4.05672	2.0911
	11.548	4.05672	2.052	2.0253	2.0219	2.1333			11.475	4.05672	2.0674
	11.556	4.05672	2.0528	2.0074	2.0148	2.0966			11.483	4.05672	2.0391
	11.564	4.05672	2.0626	2.0623	2.0357	2.0836			11.491	4.05672	2.0696
	11.573	4.05672	2.0445	2.024	2.0009	2.1189			11.5	4.05672	2.059
	11.581	4.05672	2.045	2.0484	2.02	2.0828			11.508	4.05672	2.0521
	11.59	4.05672	2.076	2.049	2.008	2.0988			11.516	4.05672	2.0282
	11.597	4.05672	2.0703	2.0372	2.0356	2.0665			11.525	4.05672	2.0418
	11.606	4.05672	2.0482	2.014	2.0064	2.121			11.533	4.05672	2.0235
	11.614	4.05672	2.0582	2.0216	2.011	2.0821			11.541	4.05672	2.059
	11.623	4.05672	2.0436	2.0673	2.0183	2.0893			11.55	4.05672	2.0606
	11.631	4.05672	2.0531	2.069	2.0019	2.0989			11.558	4.05672	2.0601
	11.64	4.05672	2.0485	2.0152	2.0066	2.1117			11.566	4.05672	2.0697
	11.648	4.05672	2.0694	2.0771	2.0231	2.1323			11.575	4.05672	2.0567
	11.656	4.05672	2.0461	2.0371	2.0285	2.083			11.583	4.05672	2.0285
	11.665	4.05672	2.0525	2.0461	2.0262	2.0674			11.591	4.05672	2.013
	11.673	4.05672	2.0466	2.0565	2.0391	2.0986			11.6	4.05672	2.0484
	11.681	4.05672	2.0331	2.0513	2.0441	2.0989			11.608	4.05672	2.0695
	11.69	4.05672	2.043	2.0796	2.0162	2.1138			11.616	4.05672	2.0729
	11.698	4.05672	2.0468	2.0567	2.0201	2.0938			11.625	4.05672	2.0674
	11.706	4.05672	2.0582	2.0585	2.0203	2.1216			11.633	4.05672	2.033
	11.714	4.05672	2.0381	2.0657	2.0283	2.1155			11.641	4.05672	2.062
	11.723	4.05672	2.0417	2.0581	2.0242	2.0964			11.65	4.05672	2.0443
	11.732	4.05672	2.0351	2.0418	2.0483	2.0904			11.658	4.05672	2.0003
	11.74	4.05672	2.0251	2.0304	2.0266	2.0954			11.666	4.05672	2.0329
	11.748	4.05672	2.0274	2.0128	2.0219	2.1045			11.676	4.05672	2.0308
	11.757	4.05672	2.052	2.0032	2.0333	2.0853			11.683	4.05672	2.0909
	11.764	4.05672	2.0401	2.0559	2.0144	2.0815			11.691	4.05672	2.0631
	11.773	4.05672	2.0307	2.0545	2.0223	2.097			11.7	4.05672	2.0807
	11.781	4.05672	2.0577	2.0798	2.024	2.1075			11.708	4.05672	2.068
	11.79	4.05672	2.0228	2.0574	2.0138	2.0913			11.716	4.05672	2.0329
	11.798	4.05672	2.0503	2.0751	2.023	2.0966			11.725	4.05672	2.0403
	11.806	4.05672	2.0621	2.0708	1.995	2.0805			11.733	4.05672	2.0245
	11.815	4.05672	2.0366	2.0669	2.0446	2.0869			11.741	4.05672	2.0575
	11.822	4.05672	2.0382	2.0816	2.0042	2.0782			11.75	4.05672	2.0561
	11.831	4.05672	2.0503	2.0381	2.019	2.0589			11.758	4.05672	2.0598
	11.84	4.05672	2.0564	2.0716	2.0177	2.0725			11.766	4.05672	2.0344
	11.848	4.05672	2.0358	2.0562	2.035	2.0637			11.775	4.05672	2.0302
	11.856	4.05672	2.0448	2.0594	2.0028	2.0831			11.783	4.05672	2.0638
	11.865	4.05672	2.051	2.0584	2.0094	2.0753			11.791	4.05672	2.0605
	11.872	4.05672	2.0628	2.0525	2.0326	2.0651			11.8	4.05672	2.0234
	11.881	4.05672	2.0403	2.011	2.03	2.0714			11.808	4.05672	2.07
	11.89	4.05672	2.0684	2.0408	2.019	2.0864			11.816	4.05672	2.0865
	11.898	4.05672	2.0386	2.0709	2.016	2.0972			11.825	4.05672	2.0298
	11.907	4.05672	2.0434	2.089	2.0113	2.1013			11.833	4.05672	2.066
	11.915	4.05672	2.0457	2.0596	2.0439	2.0999			11.841	4.05672	2.0415
	11.922	4.05672	2.0392	2.0455	2.0079	2.1238			11.85	4.05672	2.0519
	11.931	4.05672	2.0459	2.0439	1.9989	2.087			11.858	4.05672	2.0562
	11.939	4.05672	2.0344	2.055	2.0307	2.1165			11.866	4.05672	2.0384
	11.948	4.05672	2.0362	2.0601	2.0193	2.0884			11.875	4.05672	2.0244
	11.956	4.05672	2.0469	2.052	2.015	2.0823			11.883	4.05672	2.0677
	11.965	4.05672	2.0409	2.0382	2.0094	2.1135			11.891	4.05672	2.0556
	11.972	4.05672	2.0319	2.0756	2.0014	2.0732			11.9	4.05672	2.0396
	11.981	4.05672	2.0659	2.0617	2.001	2.0968			11.908	4.05672	2.0583
	11.99	4.05672	2.0264	2.0156	2.0018	2.0766			11.916	4.05672	2.052
	11.998	4.05672	2.0349	2.0475	2.0243	2.0954			11.925	4.05672	2.009
	12.007	4.05672	2.0633	2.0813	2.0292	2.1001			11.933	4.05672	2.0412
	12.014	4.05672	2.0213	2.0474	2.0037	2.1084			11.941	4.05672	2.0391
	12.023	4.05672	2.0514	2.071	2.0091	2.0784			11.949	4.05672	2.0475
	12.031	4.05672	2.0313	2.0461	2.0081	2.0506			11.958	4.05672	2.0355
	12.04	4.05672	2.0409	2.0601	2.0128	2.1222			11.966	4.05672	2.044
	12.048	4.05672	2.0464	2.0826	2.0143	2.1222			11.975	4.05672	2.0241
	12.057	4.05672	2.0225	2.0527	2.0116	2.0559			11.983	4.05672	2.0768
	12.065	4.05672	2.0642	2.047	2.0317	2.1066			11.991	4.05672	2.0493
	12.073	4.05672	2.0341	2.0565	2.0011	2.1115			12	4.05672	2.0449
	12.08	4.05672	2.0412	2.0793	2.005	2.1044			12.008	4.05672	2.0616
	12.089	4.05672	2.0502	2.0307	2.0316	2.0994			12.016	4.05672	2.0373
	12.098	4.05672	2.0254	2.0423	2.0225	2.116			12.025	4.05672	2.0815
	12.106	4.05672	2.0241	2.0447	1.9984	2.069			12.033	4.05672	2.0465
	12.115	4.05672	2.0279	2.0349	2.0016	2.0821			12.041	4.05672	2.0477
	12.123	4.05672	2.0363	2.0388	1.9961	2.1002			12.05	4.05672	2.0333
	12.13	4.05672	2.0309	2.0635	2.0122	2.1049			12.058	4.05672	2.0716
	12.14	4.05672	2.0259	2.0463	2.0341	2.1021			12.066	4.05672	2.0552
	12.148	4.05672	2.0505	2.0449	2.0312	2.0877			12.074	4.05672	1.9983
	12.155	4.05672	2.0229	2.0422	2.0134	2.1132			12.083	4.05672	2.007
	12.164	4.05672	2.0346	2.024	1.9988	2.1135			12.091	4.05672	2.0389
	12.173	4.05672	2.0283	2.0733	2.0258	2.1202			12.099	4.05672	2.005
	12.18	4.05672	2.031	2.0863	1.994	2.1269			12.108	4.05672	2.0713
	12.189	4.05672	2.0414	2.0361	1.9804	2.086			12.116	4.05672	2.0489
	12.198	4.05672	2.0371	2.0281	2.0233	2.0326			12.124	4.05672	2.031
	12.206	4.05672	2.0381	2.0625	2.0131	2.0933			12.133	4.05672	2.0057
	12.215	4.05672	2.0364	2.0435	2.0413	2.1199			12.141	4.05672	2.0326
	12.223	4.05672	2.0518	2.0667	2.0323	2.1124			12.149	4.05672	2.0602
	12.23	4.05672	2.0342	2.0683	2.0053	2.1046			12.158	4.05672	2.0545
	12.24	4.05672	2.0256	2.0374	2.0408	2.1135			12.166	4.05672	2.0432
	12.248	4.05672	2.0403	2.0663	2.0252	2.0834			12.174	4.05672	2.0283
	12.256	4.05672	2.0553	2.0611	2.016	2.1084			12.183	4.05672	2.0343
	12.265	4.05672	2.0534	2.0557	2.0259	2.1246			12.191	4.05672	2.0487
	12.273	4.05672	2.0346	2.0502	1.9918	2.0917			12.199	4.05672	2.0361
	12.281	4.05672	2.0462	2.0265	1.9897	2.0832			12.208	4.05672	2.0921
	12.289	4.05672	2.071	2.0194	2.0192	2.1221			12.216	4.05672	2.0409
	12.297	4.05672	2.0486	2.0204	1.9852	2.0826			12.226	4.05672	2.0486
	12.306	4.05672	2.038	2.0474	2.0058	2.0724			12.233	4.05672	2.0441
	12.314	4.05672	2.0684	2.0508	2.0205	2.1472			12.241	4.05672	2.0651
	12.323	4.05672	2.0485	2.0227	2.008	2.1082			12.249	4.05672	2.0514
	12.331	4.05672	2.0515	2.0573	2.0134	2.1139			12.258	4.05672	2.0782
	12.339	4.05672	2.0552	2.0731	2.0395	2.1216			12.266	4.05672	2.0637
	12.348	4.05672	2.0423	2.0656	2.0355	2.1133			12.274	4.05672	2.0316
	12.356	4.05672	2.0646	2.0511	2.026	2.0943			12.283	4.05672	2.0253
	12.365	4.05672	2.056	2.0261	2.0405	2.1094			12.291	4.05672	2.0627
	12.373	4.05672	2.0518	2.044	2.0014	2.0616			12.299	4.05672	2.0261
	12.382	4.05672	2.0439	2.0499	2.0176	2.0956			12.308	4.05672	2.0209
	12.389	4.05672	2.043	2.0633	2.0564	2.0844			12.316	4.05672	2.019
	12.397	4.05672	2.0702	2.0632	2.0053	2.0771			12.324	4.05672	2.0352
	12.406	4.05672	2.0458	2.0658	2.029	2.0512			12.333	4.05672	2.0373
	12.414	4.05672	2.0157	2.0605	2.0107	2.1001			12.341	4.05672	2.0902
	12.423	4.05672	2.0512	2.0646	2.0231	2.0609			12.349	4.05672	2.0456
	12.431	4.05672	2.0404	2.0275	2.0148	2.0982			12.358	4.05672	2.0253
	12.439	4.05672	2.0633	2.0436	2.0076	2.1068			12.366	4.05672	2.0537
	12.448	4.05672	2.0308	2.0488	2.0173	2.1274			12.374	4.05672	2.0487
	12.456	4.05672	2.0629	2.0541	2.0033	2.0733			12.383	4.05672	2.0307
	12.464	4.05672	2.0499	2.0579	2.0305	2.145			12.391	4.05672	2.0326
	12.473	4.05672	2.0441	2.0577	2.0185	2.0683			12.399	4.05672	2.0396
	12.481	4.05672	2.051	2.0682	2.0153	2.0808			12.408	4.05672	2.0352
	12.489	4.05672	2.0346	2.0546	2.0146	2.1422			12.416	4.05672	2.0648
	12.498	4.05672	2.051	2.035	2.0338	2.1077			12.424	4.05672	2.0694
	12.506	4.05672	2.0315	2.0367	2.0306	2.1029			12.433	4.05672	2.0645
	12.514	4.05672	2.0463	2.0252	2.004	2.0869			12.441	4.05672	2.0464
	12.522	4.05672	2.0668	2.0409	2.0035	2.1085			12.449	4.05672	2.0179
	12.532	4.05672	2.0706	2.0469	2.0276	2.0671			12.458	4.05672	2.0217
	12.539	4.05672	2.0639	2.0529	2.0146	2.0953			12.466	4.05672	2.0548
	12.548	4.05672	2.0526	2.0636	2.0324	2.0971			12.474	4.05672	2.0551
	12.557	4.05672	2.037	2.0554	2.0014	2.1193			12.483	4.05672	2.0827
	12.564	4.05672	2.0374	2.0736	2.0186	2.1251			12.491	4.05672	2.0529
	12.573	4.05672	2.0498	2.0661	2.0234	2.1032			12.499	4.05672	2.077
	12.581	4.05672	2.0542	2.0022	2.0217	2.0924			12.508	4.05672	2.0541
	12.589	4.05672	2.0475	2.0599	2.0344	2.1269			12.516	4.05672	2.0652
	12.597	4.05672	2.0883	2.0231	2.0109	2.1016			12.524	4.05672	2.0224
	12.606	4.05672	2.0932	2.0635	2.0229	2.0953			12.533	4.05672	2.0082
	12.615	4.05672	2.0447	2.0501	2.0313	2.0476			12.541	4.05672	2.0149
	12.623	4.05672	2.0338	2.0946	1.9972	2.079			12.549	4.05672	2.0591
	12.631	4.05672	2.0437	2.0672	2.0419	2.1105			12.558	4.05672	2.0769
	12.639	4.05672	2.0853	2.0422	2.0268	2.0782			12.566	4.05672	2.0718
	12.647	4.05672	2.0535	2.0349	2.0294	2.1024			12.574	4.05672	2.0558
	12.656	4.05672	2.0737	2.0581	1.9844	2.0947			12.583	4.05672	2.0585
	12.664	4.05672	2.0573	2.0638	1.9938	2.0807			12.591	4.05672	2.0393
	12.673	4.05672	2.0516	2.0708	2.0014	2.1224			12.599	4.05672	2.0802
	12.681	4.05672	2.0449	2.0284	2.0032	2.095			12.608	4.05672	2.065
	12.689	4.05672	2.0451	2.0369	2.028	2.0761			12.616	4.05672	2.0592
	12.698	4.05672	2.0452	2.038	2.0138	2.0817			12.624	4.05672	2.0294
	12.706	4.05672	2.0712	2.0634	2.0182	2.065			12.633	4.05672	2.0641
	12.714	4.05672	2.0617	2.0614	2.024	2.0674			12.641	4.05672	2.0372
	12.723	4.05672	2.0555	2.0523	2.0442	2.0816			12.649	4.05672	2.0578
	12.731	4.05672	2.0361	2.0321	2.0152	2.0728			12.658	4.05672	2.062
	12.74	4.05672	2.0211	2.0227	2.0001	2.0921			12.667	4.05672	2.0689
	12.747	4.05672	2.0543	2.0355	2.0321	2.1036			12.674	4.05672	2.0209
	12.756	4.05672	2.0425	2.051	2.0257	2.1318			12.683	4.05672	2.0707
	12.764	4.05672	2.0321	2.0428	2.0106	2.1026			12.691	4.05672	2.0586
	12.773	4.05672	2.0479	2.0594	2.0325	2.1076			12.699	4.05672	2.066
	12.781	4.05672	2.0508	2.0523	2.0109	2.0888			12.708	4.05672	2.0683
	12.789	4.05672	2.0452	2.0537	2.0268	2.0968			12.716	4.05672	2.0787
	12.798	4.05672	2.0517	2.0762	2.0123	2.108			12.724	4.05672	2.0554
	12.806	4.05672	2.0244	2.0327	2.0189	2.1157			12.733	4.05672	2.0191
	12.814	4.05672	2.0599	2.0806	2.0139	2.1212			12.741	4.05672	2.0515
	12.823	4.05672	2.0343	2.0553	2.0036	2.1198			12.749	4.05672	2.0735
	12.831	4.05672	2.064	2.0639	2.0019	2.0353			12.758	4.05672	2.0502
	12.839	4.05672	2.0454	2.052	2.0026	2.1093			12.766	4.05672	2.0512
	12.848	4.05672	2.0386	2.0728	2.0047	2.0648			12.776	4.05672	2.0453
	12.855	4.05672	2.0257	2.0707	2.0296	2.1581			12.783	4.05672	2.0632
	12.864	4.05672	2.0315	2.0785	2.0138	2.1027			12.791	4.05672	2.0731
	12.873	4.05672	2.0241	2.0722	2.0092	2.073			12.799	4.05672	2.0553
	12.881	4.05672	2.0308	2.0319	2.0279	2.107			12.807	4.05672	2.0879
	12.889	4.05672	2.0468	2.0763	1.9978	2.0811			12.816	4.05672	2.0775
	12.898	4.05672	2.0446	2.0334	2.0167	2.1154			12.824	4.05672	2.0483
	12.905	4.05672	2.0605	2.0582	2.0065	2.1135			12.833	4.05672	2.033
	12.914	4.05672	2.0378	2.0717	2.0098	2.1248			12.841	4.05672	2.0484
	12.923	4.05672	2.0135	2.0391	2.0106	2.1054			12.849	4.05672	2.0565
	12.932	4.05672	2.0478	2.0674	2.001	2.1327			12.858	4.05672	2.0297
	12.939	4.05672	2.039	2.0562	2.033	2.1023			12.866	4.05672	2.0352
	12.948	4.05672	2.0555	2.0368	2.0239	2.1177			12.874	4.05672	2.0343
	12.955	4.05672	2.0486	2.02	1.9819	2.107			12.883	4.05672	2.0591
	12.964	4.05672	2.0455	2.0353	2.0011	2.1027			12.891	4.05672	2.0725
	12.973	4.05672	2.0558	2.0589	2.0054	2.1103			12.899	4.05672	2.0143
	12.981	4.05672	2.0368	2.0226	2.0163	2.0946			12.908	4.05672	2.0428
	12.991	4.05672	2.0523	2.051	2.0151	2.0862			12.916	4.05672	2.0713
	12.997	4.05672	2.0468	2.0571	2.0196	2.1044			12.924	4.05672	2.0288
	13.006	4.05672	2.0214	2.0356	2.0225	2.0725			12.933	4.05672	2.0758
	13.014	4.05672	2.0353	1.9951	2.0286	2.1115			12.941	4.05672	2.0383
	13.023	4.05672	2.0506	2.0459	2.0161	2.0977			12.949	4.05672	2.0577
	13.03	4.05672	2.0442	2.0556	2.0302	2.0934			12.958	4.05672	2.0836
	13.039	4.05672	2.0189	2.0896	2.0257	2.0835			12.966	4.05672	2.0481
	13.048	4.05672	2.0618	2.0381	2.0508	2.0772			12.974	4.05672	2.0577
	13.055	4.05672	2.0608	2.0651	2.0258	2.0741			12.983	4.05672	2.0133
	13.064	4.05672	2.0699	2.06	1.9904	2.0852			12.991	4.05672	2.0311
	13.073	4.05672	2.0823	2.0187	2.0226	2.1025			12.999	4.05672	2.0289
	13.08	4.05672	2.0514	2.07	2.033	2.1211			13.007	4.05672	2.0341
	13.089	4.05672	2.0523	2.0502	2.0297	2.1293			13.016	4.05672	2.0135
	13.098	4.05672	2.042	2.0275	2.0199	2.0762			13.024	4.05672	2.0484
	13.105	4.05672	2.0495	2.0642	2.0302	2.083			13.032	4.05672	2.0493
	13.115	4.05672	2.0425	2.0418	2.0021	2.0824			13.041	4.05672	2.0226
	13.123	4.05672	2.0477	2.0383	2.0191	2.1523			13.049	4.05672	2.0471
	13.131	4.05672	2.0593	2.05	2.0122	2.1156			13.057	4.05672	2.0282
	13.14	4.05672	2.0502	2.0175	2.0138	2.0842			13.066	4.05672	2.0206
	13.148	4.05672	2.0563	2.0486	2.0107	2.1154			13.074	4.05672	2.0077
	13.156	4.05672	2.0351	2.0387	2.0071	2.0844			13.083	4.05672	2.0258
	13.163	4.05672	2.0568	2.0445	2.0148	2.0731			13.091	4.05672	2.0174
	13.173	4.05672	2.0493	2.0654	2.0305	2.0794			13.099	4.05672	2.0139
	13.181	4.05672	2.069	2.0805	1.9973	2.1224			13.107	4.05672	2.0615
	13.189	4.05672	2.0531	2.0542	2.0116	2.0922			13.116	4.05672	2.0243
	13.198	4.05672	2.0465	2.0647	2.0223	2.1001			13.124	4.05672	2.0761
	13.206	4.05672	2.0463	2.0542	2.0227	2.067			13.132	4.05672	2.0718
	13.213	4.05672	2.0496	2.0154	2.0124	2.075			13.141	4.05672	2.0313
	13.223	4.05672	2.0357	2.0506	2.0215	2.0727			13.149	4.05672	2.0145
	13.231	4.05672	2.049	2.0064	1.9945	2.0988			13.157	4.05672	2.0577
	13.239	4.05672	2.053	2.0455	2.0194	2.1175			13.166	4.05672	2.0388
	13.248	4.05672	2.0526	2.0464	2.0204	2.0913			13.174	4.05672	2.069
	13.256	4.05672	2.0549	2.087	2.0147	2.1045			13.182	4.05672	2.017
	13.263	4.05672	2.048	2.0894	2.0115	2.1056			13.191	4.05672	2.0716
	13.273	4.05672	2.0405	2.0451	2.0157	2.0914			13.199	4.05672	2.0353
	13.281	4.05672	2.018	2.0681	2.0051	2.0946			13.207	4.05672	2.0434
	13.29	4.05672	2.0592	2.04	2.0275	2.1258			13.216	4.05672	2.0569
	13.298	4.05672	2.0343	2.0696	2.0322	2.1131			13.224	4.05672	2.0395
	13.306	4.05672	2.0415	2.0676	2.0227	2.0603			13.232	4.05672	2.0483
	13.313	4.05672	2.0592	2.0876	2.0269	2.0968			13.241	4.05672	2.0551
	13.322	4.05672	2.0924	2.0771	2.0208	2.0858			13.249	4.05672	2.0342
	13.331	4.05672	2.0553	2.0533	2.0201	2.1219			13.258	4.05672	2.033
	13.339	4.05672	2.0488	2.026	2.0308	2.1054			13.266	4.05672	2.0579
	13.347	4.05672	2.0516	2.0385	2.0186	2.0852			13.274	4.05672	2.0335
	13.356	4.05672	2.0307	2.0488	2.0069	2.0838			13.283	4.05672	2.029
	13.363	4.05672	2.0443	2.0567	2.0268	2.0916			13.291	4.05672	2.0655
	13.373	4.05672	2.0541	2.0367	2.0426	2.1322			13.299	4.05672	2.0569
	13.381	4.05672	2.0573	2.0668	2.044	2.1008			13.307	4.05672	2.05
	13.39	4.05672	2.0354	2.0679	2.0373	2.0878			13.316	4.05672	2.0408
	13.397	4.05672	2.0626	2.0647	2.016	2.103			13.326	4.05672	2.0402
	13.406	4.05672	2.0662	2.0534	1.9935	2.0975			13.332	4.05672	2.0768
	13.414	4.05672	2.0674	2.0547	2.0167	2.1012			13.341	4.05672	2.0679
	13.422	4.05672	2.0636	2.0535	2.0309	2.092			13.349	4.05672	2.077
	13.431	4.05672	2.0296	2.042	2.0041	2.1077			13.357	4.05672	2.07
	13.439	4.05672	2.0386	2.0763	2.0362	2.1129			13.366	4.05672	2.0811
	13.447	4.05672	2.0383	2.0364	2.0338	2.0672			13.374	4.05672	2.071
	13.456	4.05672	2.0153	2.046	2.0043	2.0737			13.382	4.05672	2.0318
	13.464	4.05672	2.0413	2.0501	2.0375	2.1058			13.391	4.05672	2.0498
	13.473	4.05672	2.0377	2.0493	1.9914	2.0949			13.399	4.05672	2.0286
	13.481	4.05672	2.042	2.0696	2.0079	2.1066			13.407	4.05672	2.0164
	13.489	4.05672	2.0449	2.0447	2.0062	2.1356			13.416	4.05672	2.0715
	13.498	4.05672	2.0564	2.0757	2.0274	2.0965			13.424	4.05672	2.064
	13.506	4.05672	2.0607	2.0378	2.0056	2.0959			13.432	4.05672	2.0755
	13.514	4.05672	2.0394	2.0306	2.0042	2.1068			13.441	4.05672	2.0292
	13.522	4.05672	2.0305	2.0434	2.0218	2.0952			13.449	4.05672	2.0745
	13.531	4.05672	2.027	2.0535	1.9887	2.0654			13.457	4.05672	2.0549
	13.538	4.05672	2.0469	2.0445	2.0062	2.1044			13.466	4.05672	2.0555
	13.548	4.05672	2.0421	2.0451	2.028	2.0823			13.474	4.05672	2.0547
	13.556	4.05672	2.0538	2.0629	2.0384	2.0687			13.482	4.05672	2.0592
	13.564	4.05672	2.0474	2.0588	2.0274	2.1087			13.491	4.05672	2.06
	13.572	4.05672	2.0627	2.037	2.0221	2.1239			13.499	4.05672	2.0606
	13.581	4.05672	2.0272	2.0173	2.0358	2.1031			13.508	4.05672	2.0797
	13.589	4.05672	2.0367	2.0525	2.0067	2.084			13.516	4.05672	2.0631
	13.598	4.05672	2.0294	2.0534	2.0065	2.0962			13.524	4.05672	2.074
	13.606	4.05672	2.022	2.0546	2.0275	2.0682			13.532	4.05672	2.0382
	13.614	4.05672	2.0374	2.0662	1.9912	2.1206			13.541	4.05672	2.0287
	13.623	4.05672	2.0462	2.048	2.0298	2.1385			13.549	4.05672	2.0271
	13.63	4.05672	2.05	2.0636	2.0255	2.1061			13.557	4.05672	2.0276
	13.639	4.05672	2.038	2.0606	2.0161	2.1141			13.566	4.05672	2.0855
	13.648	4.05672	2.0274	2.0613	2.0397	2.1149			13.574	4.05672	2.0725
	13.656	4.05672	2.033	2.0124	2.0374	2.0971			13.582	4.05672	2.0555
	13.664	4.05672	2.0365	2.0431	2.0182	2.1278			13.591	4.05672	2.06
	13.673	4.05672	2.033	2.0381	2.0337	2.1178			13.599	4.05672	2.0831
	13.68	4.05672	2.0363	2.0126	2.0058	2.1008			13.607	4.05672	2.0722
	13.689	4.05672	2.0278	2.031	2.019	2.1107			13.616	4.05672	2.0784
	13.697	4.05672	2.0228	2.0365	2.0143	2.0634			13.624	4.05672	2.0762
	13.706	4.05672	2.0425	2.0545	2.0453	2.103			13.632	4.05672	2.0933
	13.714	4.05672	2.0374	2.0488	2.0019	2.0919			13.641	4.05672	2.0576
	13.722	4.05672	2.0446	2.0589	2.032	2.1002			13.649	4.05672	2.0475
	13.73	4.05672	2.0477	2.0688	1.9995	2.1294			13.657	4.05672	2.0235
	13.739	4.05672	2.0189	2.0395	2.0003	2.1016			13.666	4.05672	2.0232
	13.747	4.05672	2.0425	2.0799	2.0054	2.1221			13.674	4.05672	2.0387
	13.756	4.05672	2.0271	2.0345	2.0335	2.1045			13.682	4.05672	2.0122
	13.764	4.05672	2.0751	2.0682	2.0189	2.0474			13.691	4.05672	2.0493
	13.772	4.05672	2.0512	2.0846	2.0382	2.0746			13.699	4.05672	2.0638
	13.78	4.05672	2.0426	2.0673	2.035	2.1042			13.707	4.05672	2.06
	13.789	4.05672	2.0647	2.0478	2.0217	2.0933			13.716	4.05672	2.0744
	13.797	4.05672	2.0478	2.0624	2.036	2.0891			13.724	4.05672	2.0647
	13.806	4.05672	2.0268	2.075	2.0236	2.0877			13.732	4.05672	2.054
	13.814	4.05672	2.073	2.057	2.0279	2.0886			13.741	4.05672	2.0755
	13.823	4.05672	2.0339	2.0608	2.0413	2.0935			13.749	4.05672	2.0928
	13.83	4.05672	2.0412	2.0719	2.0012	2.0664			13.757	4.05672	2.0683
	13.839	4.05672	2.0506	2.0599	2.0594	2.0851			13.766	4.05672	2.0312
	13.847	4.05672	2.0437	2.0045	2.0201	2.0773			13.774	4.05672	2.0539
	13.856	4.05672	2.0366	2.0209	2.0234	2.0716			13.782	4.05672	2.0551
	13.863	4.05672	2.0224	2.0539	2.0209	2.078			13.791	4.05672	2.0671
	13.872	4.05672	2.0312	2.047	1.9994	2.1109			13.799	4.05672	2.0445
	13.881	4.05672	2.0225	2.0646	2.0094	2.102			13.807	4.05672	2.0766
	13.888	4.05672	2.0514	2.0432	2.0395	2.105			13.816	4.05672	2.0589
	13.896	4.05672	2.0442	2.0513	2.0167	2.1007			13.824	4.05672	2.0813
	13.906	4.05672	2.0508	2.0336	2.0282	2.1096			13.832	4.05672	2.063
	13.914	4.05672	2.0546	2.0813	2.0455	2.1346			13.841	4.05672	2.0365
	13.923	4.05672	2.0375	2.0474	2.0201	2.1126			13.849	4.05672	2.0538
	13.93	4.05672	2.0269	2.0545	2.0065	2.1246			13.857	4.05672	2.0553
	13.939	4.05672	2.0382	2.0611	2.0395	2.1045			13.866	4.05672	2.0841
	13.947	4.05672	2.0631	2.0499	2.0255	2.0857			13.877	4.05672	2.0302
	13.956	4.05672	2.0478	2.0806	2.032	2.1136			13.882	4.05672	2.0749
	13.964	4.05672	2.0338	2.0401	2.0117	2.0734			13.891	4.05672	2.072
	13.972	4.05672	2.0466	2.0491	2.0176	2.1162			13.899	4.05672	2.0748
	13.981	4.05672	2.0605	2.0643	2.0343	2.1083			13.907	4.05672	2.0637
	13.988	4.05672	2.0753	2.0884	2.0024	2.0761			13.916	4.05672	2.0704
	13.996	4.05672	2.0488	2.0754	2.0214	2.1063			13.924	4.05672	1.9989
	14.006	4.05672	2.0894	2.0763	2.0147	2.0729			13.932	4.05672	2.082
	14.014	4.05672	2.0659	2.0458	2.009	2.0776			13.941	4.05672	2.0365
	14.023	4.05672	2.0624	2.0383	1.9995	2.0851			13.949	4.05672	2.0589
	14.031	4.05672	2.0385	2.0512	1.9985	2.0923			13.957	4.05672	2.0372
	14.038	4.05672	2.0286	2.0037	2.0134	2.1266			13.966	4.05672	2.0262
	14.047	4.05672	2.0361	2.0403	2.0355	2.1114			13.974	4.05672	2.0744
	14.056	4.05672	2.0447	2.0532	2.0134	2.1141			13.982	4.05672	2.0577
	14.063	4.05672	2.0538	2.0542	2.0181	2.0811			13.991	4.05672	2.0122
	14.072	4.05672	2.0544	2.062	2.0305	2.0683			13.999	4.05672	2.0606
	14.081	4.05672	2.0422	2.0298	2.0209	2.094			14.007	4.05672	1.9855
	14.088	4.05672	2.0357	2.0479	1.9879	2.0897			14.016	4.05672	2.0496
	14.096	4.05672	2.041	2.0593	2.0212	2.1318			14.024	4.05672	2.0513
	14.106	4.05672	2.0191	2.0906	2.0233	2.0354			14.032	4.05672	2.0202
	14.114	4.05672	2.0579	2.0684	2.0146	2.1411			14.04	4.05672	2.0535
	14.123	4.05672	2.0394	2.0385	2.0206	2.0881			14.049	4.05672	2.0066
	14.13	4.05672	2.0447	2.0454	2.012	2.0995			14.057	4.05672	2.0273
	14.139	4.05672	2.0539	2.0584	2.005	2.1199			14.066	4.05672	2.0229
	14.146	4.05672	2.0399	2.0278	2.0273	2.081			14.074	4.05672	2.0186
	14.156	4.05672	2.0281	2.0714	2.0309	2.1046			14.082	4.05672	2.0624
	14.164	4.05672	2.0393	2.0206	2.0469	2.0597			14.091	4.05672	2.0516
	14.172	4.05672	2.0353	2.0297	2.0204	2.0935			14.099	4.05672	2.0612
	14.181	4.05672	2.0431	2.0533	2.0339	2.0839			14.107	4.05672	2.034
	14.189	4.05672	2.0369	2.0772	2.0463	2.0976			14.116	4.05672	2.0855
	14.196	4.05672	2.0511	2.0666	2.0104	2.1395			14.124	4.05672	2.0744
	14.206	4.05672	2.0319	2.0434	2.0314	2.114			14.132	4.05672	2.0523
	14.214	4.05672	2.0284	2.0567	2.0253	2.1347			14.141	4.05672	2.032
	14.222	4.05672	2.0245	2.0718	2.0287	2.1014			14.149	4.05672	2.0858
	14.231	4.05672	2.0481	2.0647	1.9944	2.0962			14.157	4.05672	2.0298
	14.239	4.05672	2.0416	2.0045	2.0253	2.1131			14.166	4.05672	2.0218
	14.246	4.05672	2.0281	2.0407	2.0226	2.1312			14.174	4.05672	2.0468
	14.256	4.05672	2.0273	2.0491	2.0269	2.1302			14.182	4.05672	2.0419
	14.264	4.05672	2.0324	2.066	2.0486	2.0641			14.19	4.05672	2.0575
	14.272	4.05672	2.0315	2.0557	2.0369	2.0496			14.199	4.05672	2.05
	14.281	4.05672	2.0386	2.0274	2.0431	2.0994			14.207	4.05672	2.0341
	14.288	4.05672	2.0294	2.0789	2.0443	2.1273			14.215	4.05672	2.0319
	14.298	4.05672	2.0474	2.0811	2.0184	2.1101			14.224	4.05672	2.0777
	14.306	4.05672	2.054	2.0621	2.0324	2.0872			14.232	4.05672	2.049
	14.314	4.05672	2.0288	2.03	2.0188	2.0595			14.24	4.05672	2.068
	14.322	4.05672	2.0021	2.067	2.0056	2.0792			14.249	4.05672	2.029
	14.331	4.05672	2.0472	2.0809	2.0393	2.0922			14.257	4.05672	2.0554
	14.339	4.05672	2.0316	2.0698	2.0525	2.113			14.265	4.05672	2.0208
	14.346	4.05672	2.0333	2.0732	2.0092	2.0839			14.274	4.05672	2.0365
	14.356	4.05672	2.0431	2.0122	2.012	2.0982			14.282	4.05672	2.0612
	14.363	4.05672	2.0283	2.0511	2.024	2.0951			14.29	4.05672	2.0614
	14.372	4.05672	2.0312	2.0517	2.014	2.1021			14.299	4.05672	2.0734
	14.381	4.05672	2.0499	2.044	2.0229	2.108			14.307	4.05672	2.029
	14.389	4.05672	2.0321	2.0593	2.0133	2.0784			14.316	4.05672	2.0435
	14.397	4.05672	2.0457	2.0552	2.0299	2.1222			14.324	4.05672	2.0708
	14.405	4.05672	2.0316	2.0452	2.0154	2.0958			14.332	4.05672	2.0635
	14.414	4.05672	2.0605	2.0673	1.9971	2.0836			14.34	4.05672	2.0678
	14.422	4.05672	2.04	2.0616	2.0213	2.1069			14.349	4.05672	2.0324
	14.43	4.05672	2.0532	2.0527	2.0339	2.1271			14.357	4.05672	2.0606
	14.439	4.05672	2.0433	2.0276	2.0189	2.119			14.365	4.05672	2.0695
	14.447	4.05672	2.026	2.0119	2.0037	2.0786			14.374	4.05672	2.0449
	14.455	4.05672	2.0407	2.0224	2.0076	2.0809			14.382	4.05672	2.0682
	14.464	4.05672	2.0241	2.0314	2.0307	2.0937			14.39	4.05672	1.983
	14.472	4.05672	2.0411	1.9868	2.0244	2.1237			14.399	4.05672	2.0703
	14.48	4.05672	2.0304	2.0573	2.0024	2.112			14.407	4.05672	2.0522
	14.489	4.05672	2.0349	2.0536	2.0078	2.0894			14.415	4.05672	2.0715
	14.497	4.05672	2.0349	2.0434	2.0213	2.1016			14.427	4.05672	2.0461
	14.505	4.05672	2.0022	2.0412	2.0149	2.1199			14.432	4.05672	2.0547
	14.514	4.05672	2.0363	2.036	2.0102	2.1392			14.441	4.05672	2.0567
	14.522	4.05672	2.0685	2.0352	2.0343	2.0819			14.449	4.05672	2.0436
	14.531	4.05672	2.0609	2.0563	2.0119	2.0821			14.457	4.05672	2.0496
	14.538	4.05672	2.0393	2.0497	1.989	2.1272			14.465	4.05672	2.0757
	14.547	4.05672	2.0131	2.0549	1.9812	2.0835			14.474	4.05672	2.0368
	14.555	4.05672	2.0851	2.0401	2.0331	2.1287			14.482	4.05672	2.0616
	14.564	4.05672	2.0586	2.0729	2.0217	2.0731			14.49	4.05672	2.0813
	14.572	4.05672	2.048	2.0231	1.995	2.1203			14.499	4.05672	2.0493
	14.58	4.05672	2.0902	2.0361	2.0001	2.1026			14.507	4.05672	2.0477
	14.589	4.05672	2.0651	2.0425	1.9977	2.0607			14.515	4.05672	2.0418
	14.598	4.05672	2.0854	2.0194	2.0348	2.0966			14.524	4.05672	2.0685
	14.605	4.05672	2.0665	2.0583	2.0319	2.0933			14.532	4.05672	2.0378
	14.614	4.05672	2.0789	2.0647	2.0053	2.1133			14.54	4.05672	2.0239
	14.622	4.05672	2.0654	2.052	2.0229	2.0712			14.549	4.05672	2.0658
	14.631	4.05672	2.0505	2.0689	2.0144	2.1156			14.557	4.05672	2.0574
	14.639	4.05672	2.0225	2.0589	2.0386	2.0928			14.565	4.05672	2.0745
	14.647	4.05672	2.0375	2.076	2.0323	2.0981			14.574	4.05672	2.0681
	14.655	4.05672	2.047	2.0421	2.0254	2.0585			14.582	4.05672	2.0365
	14.664	4.05672	2.052	2.0569	2.0492	2.091			14.59	4.05672	2.0013
	14.672	4.05672	2.0574	2.0577	2.0236	2.0623			14.599	4.05672	2.0577
	14.68	4.05672	2.0474	2.0284	2.0534	2.0803			14.607	4.05672	2.0369
	14.689	4.05672	2.0144	2.0209	2.0043	2.109			14.615	4.05672	2.0479
	14.697	4.05672	2.0112	2.0205	2.0171	2.1112			14.624	4.05672	2.0661
	14.706	4.05672	2.0369	2.0538	2.019	2.1098			14.632	4.05672	2.0644
	14.713	4.05672	2.0456	2.0181	2.0261	2.0703			14.64	4.05672	2.0285
	14.722	4.05672	2.0326	2.0606	2.0176	2.077			14.649	4.05672	2.0418
	14.73	4.05672	2.0517	2.0335	2.0179	2.0854			14.657	4.05672	2.063
	14.739	4.05672	2.0358	2.0588	2.0109	2.0838			14.665	4.05672	2.0482
	14.747	4.05672	2.0403	2.0451	2.0283	2.0913			14.674	4.05672	2.0559
	14.756	4.05672	2.0446	2.0529	2.03	2.0879			14.682	4.05672	2.0454
	14.763	4.05672	2.0299	2.0218	2.0273	2.1031			14.69	4.05672	2.0688
	14.772	4.05672	2.0392	2.0345	2.0261	2.1213			14.699	4.05672	2.0643
	14.78	4.05672	2.053	2.0227	2.028	2.105			14.707	4.05672	2.0652
	14.789	4.05672	2.0444	2.0684	2.0391	2.0769			14.715	4.05672	2.0914
	14.797	4.05672	2.0313	2.0514	2.0034	2.0749			14.724	4.05672	2.0566
	14.805	4.05672	2.0448	2.0363	2.0384	2.0991			14.732	4.05672	2.0666
	14.814	4.05672	2.0424	2.0571	2.0482	2.0837			14.74	4.05672	2.0619
	14.822	4.05672	2.0367	2.0553	2.0248	2.1204			14.749	4.05672	2.0549
	14.83	4.05672	2.0238	2.042	2.0137	2.1017			14.757	4.05672	2.0591
	14.839	4.05672	2.0458	2.0264	2.0223	2.0981			14.765	4.05672	2.0665
	14.847	4.05672	2.0304	2.0485	2.0158	2.0923			14.774	4.05672	2.0738
	14.855	4.05672	2.0549	2.0665	2.0277	2.083			14.782	4.05672	2.0205
	14.864	4.05672	2.0614	2.0661	2.0123	2.0964			14.79	4.05672	2.0415
	14.871	4.05672	2.0553	2.0642	2.0415	2.0706			14.799	4.05672	2.0686
	14.88	4.05672	2.0586	2.0249	2.0392	2.1206			14.807	4.05672	2.0624
	14.889	4.05672	2.0379	2.0357	2.022	2.0952			14.815	4.05672	2.057
	14.897	4.05672	2.0423	2.0438	2.0398	2.1145			14.824	4.05672	2.0666
	14.906	4.05672	2.0789	2.0411	2.0205	2.089			14.832	4.05672	2.0381
	14.914	4.05672	2.0379	2.0643	2.0211	2.109			14.84	4.05672	2.0299
	14.921	4.05672	2.034	2.0531	1.9984	2.097			14.849	4.05672	2.0522
	14.93	4.05672	2.0555	2.0449	2.0035	2.0655			14.857	4.05672	2.0582
	14.939	4.05672	2.0576	2.0411	2.0409	2.082			14.866	4.05672	2.0541
	14.947	4.05672	2.0351	2.0459	2.0416	2.0951			14.874	4.05672	2.0784
	14.956	4.05672	2.0893	2.0577	2.0331	2.1145			14.882	4.05672	2.0544
	14.964	4.05672	2.0478	2.0666	2.0372	2.0717			14.89	4.05672	2.0716
	14.973	4.05672	2.0539	2.08	2.0343	2.0865			14.899	4.05672	2.0473
	14.981	4.05672	2.048	2.0279	2.0088	2.1001			14.907	4.05672	2.0619
	14.989	4.05672	2.0387	2.0208	2.0267	2.0973			14.915	4.05672	2.0565
	14.997	4.05672	2.0351	2.0217	2.0161	2.0817			14.924	4.05672	2.0416
	15.005	4.05672	2.0551	2.0576	2.0301	2.0829			14.932	4.05672	2.0306
	15.014	4.05672	2.0377	2.0478	2.001	2.1048			14.94	4.05672	2.0635
	15.021	4.05672	2.029	2.0504	2.0313	2.0634			14.949	4.05672	2.0665
	15.03	4.05672	2.0618	2.0742	2.0215	2.0766			14.957	4.05672	2.0544
	15.038	4.05672	2.0482	2.0354	2.0165	2.0982			14.965	4.05672	2.0753
	15.047	4.05672	2.0485	2.055	2.0185	2.0414			14.976	4.05672	2.0716
	15.056	4.05672	2.0412	2.0325	2.0276	2.0844			14.982	4.05672	2.0695
	15.064	4.05672	2.05	2.0554	2.0057	2.1032			14.99	4.05672	2.0735
	15.072	4.05672	2.0426	2.0517	1.9953	2.0706			14.999	4.05672	2.082
	15.08	4.05672	2.0468	2.0523	2.0239	2.1155			15.007	4.05672	2.0659
	15.089	4.05672	2.0532	2.0515	2.0323	2.0821			15.015	4.05672	2.0365
	15.097	4.05672	2.0494	2.0779	2.0138	2.0741			15.024	4.05672	2.0159
	15.106	4.05672	2.0436	2.0426	1.9883	2.1189			15.032	4.05672	2.0467
	15.114	4.05672	2.0306	2.0612	2.0368	2.1414			15.04	4.05672	2.0675
	15.122	4.05672	2.0422	2.0715	2.0122	2.1013			15.049	4.05672	2.0549
	15.129	4.05672	2.0267	2.0635	2.0012	2.0507			15.057	4.05672	2.055
	15.139	4.05672	2.0343	2.0556	2.0036	2.102			15.065	4.05672	2.0482
	15.147	4.05672	2.0342	2.0689	2.0108	2.0841			15.074	4.05672	2.0395
	15.155	4.05672	2.0443	2.0815	2.0183	2.079			15.082	4.05672	2.0254
	15.164	4.05672	2.0231	2.0203	1.9952	2.1157			15.09	4.05672	2.0583
	15.172	4.05672	2.0359	2.0517	2.0267	2.1138			15.098	4.05672	2.0195
	15.181	4.05672	2.0558	2.0302	2.0174	2.1084			15.107	4.05672	2.0763
	15.19	4.05672	2.0282	2.0645	2.02	2.1286			15.115	4.05672	2.0774
	15.196	4.05672	2.0409	2.0544	2.0025	2.0831			15.124	4.05672	2.0469
	15.206	4.05672	2.0351	2.0568	2.0185	2.0882			15.132	4.05672	2.0707
	15.214	4.05672	2.0409	2.0228	2	2.0855			15.14	4.05672	2.0871
	15.222	4.05672	2.032	2.05	1.9964	2.0946			15.149	4.05672	2.0622
	15.229	4.05672	2.047	2.0438	2.0261	2.0804			15.157	4.05672	2.0191
	15.239	4.05672	2.0492	2.0417	2.0214	2.0517			15.165	4.05672	2.0102
	15.247	4.05672	2.0514	2.0436	2.0053	2.0901			15.174	4.05672	2.068
	15.255	4.05672	2.0569	2.0798	2.0076	2.0824			15.182	4.05672	2.054
	15.264	4.05672	2.033	2.0585	2.0355	2.1092			15.19	4.05672	2.041
	15.272	4.05672	2.0725	2.0594	2.0285	2.1129			15.199	4.05672	2.0362
	15.279	4.05672	2.0351	2.0373	2.0138	2.0885			15.207	4.05672	2.0572
	15.288	4.05672	2.0405	2.0698	2.0184	2.0783			15.215	4.05672	2.0698
	15.297	4.05672	2.0521	2.0562	2.012	2.0826			15.223	4.05672	2.052
	15.305	4.05672	2.0524	2.0401	2.0475	2.1166			15.232	4.05672	2.0595
	15.314	4.05672	2.0326	2.0699	2.0288	2.0873			15.24	4.05672	2.0731
	15.322	4.05672	2.0398	2.0555	2.0296	2.0931			15.248	4.05672	2.0524
	15.329	4.05672	2.024	2.0401	2.0288	2.065			15.257	4.05672	2.0689
	15.339	4.05672	2.0339	2.0242	2.0172	2.1095			15.265	4.05672	2.0512
	15.347	4.05672	2.0318	2.0539	2.0042	2.0657			15.274	4.05672	2.0499
	15.355	4.05672	2.0521	2.0377	1.9958	2.0726			15.282	4.05672	2.0743
	15.363	4.05672	2.0701	2.0547	1.9933	2.0854			15.29	4.05672	2.0711
	15.372	4.05672	2.0387	2.0525	2.0188	2.0852			15.299	4.05672	2.0485
	15.381	4.05672	2.031	2.0431	2.0085	2.0963			15.307	4.05672	2.0565
	15.388	4.05672	2.0583	2.0569	1.998	2.1139			15.315	4.05672	2.0271
	15.396	4.05672	2.033	2.0409	2.0103	2.0835			15.323	4.05672	2.092
	15.406	4.05672	2.0338	2.0487	2.0271	2.1109			15.332	4.05672	2.0567
	15.414	4.05672	2.0113	2.0445	2.0263	2.0882			15.34	4.05672	2.0788
	15.422	4.05672	2.027	2.0549	2.0265	2.1186			15.348	4.05672	2.0886
	15.43	4.05672	2.058	2.0408	2.0558	2.0711			15.357	4.05672	2.0832
	15.438	4.05672	2.0366	2.0501	2.0065	2.1058			15.365	4.05672	2.0656
	15.447	4.05672	2.0287	2.0594	2.0243	2.0843			15.373	4.05672	2.0648
	15.456	4.05672	2.042	2.02	2.0036	2.1084			15.382	4.05672	2.0679
	15.464	4.05672	2.0312	2.0686	2.0239	2.0951			15.39	4.05672	2.053
	15.472	4.05672	2.0385	2.0397	2.0076	2.1208			15.398	4.05672	2.0593
	15.48	4.05672	1.9864	2.0442	2.0144	2.0646			15.407	4.05672	2.0842
	15.488	4.05672	2.0401	2.0535	2.0057	2.0484			15.416	4.05672	2.0775
	15.496	4.05672	2.0552	2.0323	2.0208	2.1032			15.423	4.05672	2.0827
	15.505	4.05672	2.0427	2.0154	2.0245	2.1224			15.432	4.05672	2.079
	15.513	4.05672	2.0317	2.0399	2.0049	2.0529			15.44	4.05672	2.058
	15.522	4.05672	2.0493	2.0624	2.0402	2.0964			15.448	4.05672	2.0269
	15.531	4.05672	2.0253	2.0486	2.0133	2.0832			15.457	4.05672	2.0221
	15.538	4.05672	2.0364	2.0142	2.0166	2.082			15.465	4.05672	2.0689
	15.547	4.05672	2.0445	2.049	2.034	2.0839			15.473	4.05672	2.0429
	15.555	4.05672	2.0469	2.0737	2.0231	2.0882			15.482	4.05672	2.0242
	15.564	4.05672	2.055	2.0585	2.0243	2.0868			15.49	4.05672	2.064
	15.572	4.05672	2.0422	2.0427	2.0523	2.0676			15.498	4.05672	2.0312
	15.581	4.05672	2.0381	2.0403	2.0298	2.1174			15.507	4.05672	2.0812
	15.588	4.05672	2.0273	2.0408	2.0178	2.0831			15.515	4.05672	2.0493
	15.596	4.05672	2.0472	2.0392	2.0109	2.0718			15.523	4.05672	2.0702
	15.605	4.05672	2.0582	2.0388	2.0248	2.0752			15.532	4.05672	2.0664
	15.613	4.05672	2.0443	2.0543	1.9945	2.0998			15.54	4.05672	2.0681
	15.622	4.05672	2.0393	2.0488	2.0136	2.117			15.548	4.05672	2.0686
	15.63	4.05672	2.0504	2.0497	2.0529	2.079			15.557	4.05672	2.073
	15.638	4.05672	2.0444	2.0619	2.0224	2.0874			15.565	4.05672	2.0024
	15.647	4.05672	2.0448	2.0506	2.0163	2.0964			15.573	4.05672	2.0023
	15.654	4.05672	2.0257	2.0363	2.025	2.0977			15.582	4.05672	2.0458
	15.664	4.05672	2.0214	2.0067	2.0242	2.1083			15.59	4.05672	2.0798
	15.672	4.05672	2.0421	2.047	2.0095	2.0727			15.598	4.05672	2.0143
	15.68	4.05672	2.0322	2.0689	2.0278	2.0924			15.607	4.05672	2.085
	15.688	4.05672	2.0208	2.0657	2.0424	2.0959			15.615	4.05672	2.0601
	15.696	4.05672	2.0494	2.0566	1.9978	2.1248			15.623	4.05672	2.0558
	15.705	4.05672	2.0371	2.042	2.0264	2.0945			15.632	4.05672	2.0822
	15.714	4.05672	2.0496	2.0121	1.9978	2.089			15.64	4.05672	2.0231
	15.722	4.05672	2.0359	2.0429	1.9954	2.0977			15.648	4.05672	2.0547
	15.731	4.05672	2.0453	2.0489	2.0115	2.0938			15.657	4.05672	2.05
	15.739	4.05672	2.0587	2.0234	2.0109	2.0678			15.665	4.05672	2.0263
	15.746	4.05672	2.0414	2.047	2.0329	2.1183			15.673	4.05672	2.0716
	15.755	4.05672	2.0528	2.0365	2.0194	2.0833			15.682	4.05672	2.0432
	15.764	4.05672	2.0735	2.0764	1.9927	2.109			15.69	4.05672	2.0651
	15.772	4.05672	2.0376	2.0517	2.0082	2.0939			15.698	4.05672	2.0669
	15.78	4.05672	2.0286	2.0657	2.0267	2.0988			15.707	4.05672	2.0692
	15.789	4.05672	2.0325	2.0488	2.0169	2.1207			15.715	4.05672	2.0533
	15.796	4.05672	2.0363	2.0583	2.0073	2.1221			15.723	4.05672	2.0736
	15.805	4.05672	2.0332	2.0464	1.9968	2.0918			15.732	4.05672	2.0716
	15.813	4.05672	2.0263	2.0551	2.0078	2.102			15.74	4.05672	2.0587
	15.822	4.05672	2.0511	2.0739	2.0427	2.0921			15.748	4.05672	2.0471
	15.83	4.05672	2.038	2.0516	2.0141	2.105			15.757	4.05672	2.0597
	15.839	4.05672	2.0502	2.0122	2.0253	2.0828			15.765	4.05672	2.065
	15.846	4.05672	2.0616	2.0493	2.0386	2.1058			15.773	4.05672	2.0499
	15.855	4.05672	2.0489	2.0608	2.0136	2.0573			15.782	4.05672	2.0353
	15.863	4.05672	2.0526	2.0531	2.0083	2.1352			15.79	4.05672	2.0592
	15.872	4.05672	2.0463	2.0565	2.0216	2.1235			15.798	4.05672	2.0721
	15.88	4.05672	2.0317	2.0586	2.0111	2.1004			15.807	4.05672	2.0524
	15.888	4.05672	2.0592	2.0132	2	2.0806			15.815	4.05672	2.0812
	15.896	4.05672	2.0058	1.9984	2.0295	2.0946			15.823	4.05672	2.0449
	15.905	4.05672	2.0411	2.0529	2.0289	2.1015			15.832	4.05672	2.0798
	15.914	4.05672	2.0332	2.0548	1.9932	2.0878			15.84	4.05672	2.0793
	15.922	4.05672	2.036	2.0638	1.9846	2.0734			15.848	4.05672	2.0413
	15.93	4.05672	2.0467	2.0377	2.0165	2.0822			15.857	4.05672	2.0855
	15.938	4.05672	2.0618	2.0597	1.9584	2.1057			15.865	4.05672	2.0725
	15.946	4.05672	2.0342	2.0481	2.0296	2.0798			15.873	4.05672	2.0777
	15.955	4.05672	2.0352	2.0382	2.0174	2.0704			15.882	4.05672	2.0729
	15.963	4.05672	2.0178	2.0379	1.9771	2.0881			15.89	4.05672	2.0707
	15.972	4.05672	2.0556	2.0478	1.9814	2.0759			15.898	4.05672	2.0134
	15.98	4.05672	2.0359	2.0393	2.0349	2.084			15.907	4.05672	2.0574
	15.989	4.05672	2.029	2.0312	2.0324	2.1048			15.915	4.05672	2.0553
	15.996	4.05672	2.0251	2.079	2.0021	2.0612			15.923	4.05672	2.0417
	16.005	4.05672	2.0392	2.03	2.0231	2.0823			15.932	4.05672	2.0711
	16.013	4.05672	2.0187	2.0715	1.9996	2.0997			15.94	4.05672	2.0536
	16.022	4.05672	2.0136	2.0531	2.0315	2.0675			15.948	4.05672	2.0722
	16.03	4.05672	2.028	2.0544	2.0212	2.0755			15.957	4.05672	2.067
	16.038	4.05672	2.0761	2.0728	2.007	2.0816			15.966	4.05672	2.0449
	16.047	4.05672	2.0415	2.0429	2.0111	2.0905			15.973	4.05672	2.0613
	16.054	4.05672	2.009	2.0434	2.0166	2.1082			15.982	4.05672	2.0777
	16.063	4.05672	2.0466	2.0316	2.0182	2.0928			15.99	4.05672	2.0248
	16.072	4.05672	2.0533	2.0671	1.9992	2.1137			15.998	4.05672	2.0606
	16.08	4.05672	2.0543	2.0556	2.0268	2.1044			16.007	4.05672	2.0687
	16.089	4.05672	2.051	2.0629	2.0289	2.1132			16.015	4.05672	2.0729
	16.097	4.05672	2.0362	2.0414	2.0345	2.1429			16.023	4.05672	2.0421
	16.104	4.05672	2.04	2.069	1.9812	2.0828			16.032	4.05672	2.0744
	16.113	4.05672	2.0443	2.039	2.01	2.1168			16.04	4.05672	2.059
	16.122	4.05672	2.0315	2.0387	2.0151	2.117			16.048	4.05672	2.079
	16.13	4.05672	2.0417	2.0478	2.019	2.1227			16.057	4.05672	2.0682
	16.138	4.05672	2.0479	2.0458	2.0226	2.0919			16.065	4.05672	2.0671
	16.147	4.05672	2.0557	2.0434	2.0195	2.0935			16.073	4.05672	2.065
	16.154	4.05672	2.0443	2.0308	2.0207	2.0604			16.082	4.05672	2.0771
	16.163	4.05672	2.0418	2.0132	1.9901	2.1182			16.09	4.05672	2.0718
	16.172	4.05672	2.0224	2.0514	2.0298	2.0905			16.098	4.05672	2.0774
	16.18	4.05672	2.0254	2.0738	2.0184	2.1048			16.107	4.05672	2.0812
	16.189	4.05672	2.019	2.084	2.0157	2.0813			16.115	4.05672	2.0769
	16.197	4.05672	2.059	2.0684	2.0099	2.1046			16.123	4.05672	2.0591
	16.204	4.05672	2.0331	2.057	2.0273	2.0919			16.132	4.05672	2.0446
	16.213	4.05672	2.0472	2.0567	2.0112	2.1487			16.14	4.05672	2.0478
	16.222	4.05672	2.019	2.0188	2.0176	2.1131			16.148	4.05672	2.0678
	16.23	4.05672	2.0508	2.0347	2.0247	2.0976			16.157	4.05672	2.0295
	16.238	4.05672	2.0429	2.0362	2.0096	2.0872			16.165	4.05672	2.0155
	16.247	4.05672	2.0395	2.0358	2.0309	2.0933			16.173	4.05672	2.0318
	16.256	4.05672	2.0522	2.0474	2.0236	2.0931			16.182	4.05672	2.0682
	16.263	4.05672	2.0522	2.0074	2.0185	2.0889			16.19	4.05672	2.0736
	16.272	4.05672	2.0492	2.0637	1.9951	2.1113			16.198	4.05672	2.0201
	16.28	4.05672	2.0471	2.0527	2.0146	2.0681			16.207	4.05672	2.079
	16.289	4.05672	2.0623	2.0564	1.9873	2.0869			16.215	4.05672	2.0396
	16.297	4.05672	2.0397	2.0173	2.0022	2.0882			16.223	4.05672	2.0867
	16.305	4.05672	2.0412	2.0252	2.0082	2.0517			16.232	4.05672	2.0391
	16.312	4.05672	2.0288	2.0662	1.9967	2.0924			16.24	4.05672	2.035
	16.322	4.05672	2.0502	2.0499	2.0362	2.107			16.248	4.05672	2.0686
	16.33	4.05672	2.0328	2.0792	2.0381	2.0867			16.257	4.05672	2.0583
	16.338	4.05672	2.0379	2.0724	2.0151	2.1151			16.265	4.05672	2.0701
	16.347	4.05672	2.0288	2.0529	2.0061	2.0641			16.273	4.05672	2.0428
	16.355	4.05672	2.04	2.0509	2.0401	2.0911			16.282	4.05672	2.0678
	16.362	4.05672	2.0697	2.0699	2.0308	2.1166			16.29	4.05672	2.0861
	16.372	4.05672	2.0423	2.0482	2.0296	2.0662			16.298	4.05672	2.0616
	16.38	4.05672	2.0645	2.0296	2.0269	2.1238			16.307	4.05672	2.0486
	16.389	4.05672	2.0511	2.0472	2.0221	2.0669			16.315	4.05672	2.0502
	16.397	4.05672	2.0459	2.0679	1.9981	2.0953			16.323	4.05672	2.0698
	16.405	4.05672	2.1001	2.0648	2.0288	2.0988			16.332	4.05672	2.0628
	16.412	4.05672	2.077	2.0604	2.0288	2.0828			16.34	4.05672	2.0673
	16.422	4.05672	2.0645	2.0493	2.0248	2.0805			16.348	4.05672	2.0295
	16.43	4.05672	2.0803	2.0521	2.0214	2.0808			16.357	4.05672	2.0618
	16.438	4.05672	2.0461	2.0677	2.0162	2.1004			16.365	4.05672	2.0222
	16.447	4.05672	2.0566	2.0425	2.0244	2.0612			16.373	4.05672	2.0788
	16.455	4.05672	2.0695	2.0443	2.0108	2.066			16.382	4.05672	2.0726
	16.462	4.05672	2.0157	2.0593	2.0539	2.0834			16.39	4.05672	2.0513
	16.472	4.05672	2.0347	2.0742	2.0485	2.0948			16.398	4.05672	2.0411
	16.48	4.05672	2.0277	2.0366	2.0521	2.0704			16.406	4.05672	2.0445
	16.488	4.05672	2.0167	2.0602	2.0134	2.1211			16.415	4.05672	2.031
	16.497	4.05672	2.0267	2.0601	2.0219	2.1128			16.423	4.05672	2.0314
	16.505	4.05672	2.0553	2.0846	2.0301	2.1226			16.432	4.05672	2.0414
	16.512	4.05672	2.0459	2.0701	2.0303	2.1061			16.44	4.05672	2.0402
	16.522	4.05672	2.0393	2.0383	2.0044	2.1047			16.448	4.05672	2.0418
	16.53	4.05672	2.0575	2.0518	2.0252	2.0875			16.457	4.05672	2.0377
	16.538	4.05672	2.0408	2.0475	2.003	2.1251			16.465	4.05672	2.0592
	16.547	4.05672	2.0376	2.0508	2.0268	2.0914			16.473	4.05672	2.0806
	16.555	4.05672	2.0339	2.0654	2.0385	2.1043			16.481	4.05672	2.0498
	16.562	4.05672	2.0309	2.0479	2.0248	2.0804			16.49	4.05672	2.0624
	16.572	4.05672	2.0275	2.0189	2.0225	2.1027			16.498	4.05672	2.0688
	16.58	4.05672	2.022	2.0448	2.0296	2.0883			16.506	4.05672	2.0946
	16.588	4.05672	2.0284	2.0491	2.0103	2.0863			16.516	4.05672	2.0738
	16.597	4.05672	2.0746	2.0877	2.0192	2.058			16.523	4.05672	2.063
	16.605	4.05672	2.0577	2.0334	1.9975	2.0673			16.531	4.05672	2.0681
	16.612	4.05672	2.0668	2.0312	2.0252	2.057			16.54	4.05672	2.0624
	16.622	4.05672	2.048	2.0557	2.0358	2.1327			16.548	4.05672	2.0651
	16.629	4.05672	2.0554	2.0585	2.0169	2.0926			16.556	4.05672	2.0729
	16.638	4.05672	2.0431	2.0321	2.0021	2.0839			16.565	4.05672	2.0642
	16.646	4.05672	2.0143	2.0475	2.0254	2.075			16.573	4.05672	2.0135
	16.655	4.05672	2.0076	2.0519	2.018	2.0812			16.581	4.05672	2.0535
	16.663	4.05672	2.0173	2.0568	2.0184	2.1042			16.59	4.05672	2.0693
	16.671	4.05672	2.0526	2.0721	2.0182	2.1109			16.598	4.05672	2.0345
	16.68	4.05672	2.0478	2.0412	2.008	2.1041			16.606	4.05672	2.0866
	16.687	4.05672	2.0405	2.0639	1.9979	2.1106			16.615	4.05672	2.0505
	16.696	4.05672	2.0288	2.0703	2.0365	2.087			16.623	4.05672	2.041
	16.705	4.05672	2.04	2.0635	2.015	2.0566			16.631	4.05672	2.0488
[truncated: 11,218 more rows]
