# Supplementary material for: CTP promotes efficient ParB-dependent DNA condensation by facilitating one-dimensional diffusion from parS
Source: eLife. 2021 Jul 12;10:e67554. doi: 10.7554/eLife.67554 (PMC8299390; doi:10.7554/eLife.67554)
Supplement: Figure 4—source data 1. [file elife-67554-fig4-data1.xlsx]

## Sheet: Figure4
Figure 4C	13xparS	2 mM CTP	4 mM MgCl2		Figure 4D	13xparS	2 mM CTP	4 mM MgCl2								Figure 4E	13xparS	200 nM ParB	4 mM MgCl2											Figure 4F	13xparS	2 mM CTP	1 mM EDTA		Figure 4G	13xparS	2 mM CTP	4 mM MgCl2	R80A
		No ParB	50 nM ParB2				No ParB		10 nM		200 nM		500 nM				No ParB		2 mM ATP		2 mM CTP		2 mM UTP		2 mM GTP		No nucleotide					200 nM ParB2				No ParB		200 nM
	Time	Extension	Extension			Force	Extension	SEM	Extension	SEM	Extension	SEM	Extension	SEM		Force	Extension	SEM	Extension	SEM	Extension	SEM	Extension	SEM	Extension	SEM	Extension	SEM			Time	Extension			Force	Extension	SEM	Extension	SEM
	0.01	2.0664	2.0132			4.96913	0.92646	0.00734	0.89565	0.02865	0.89974	0.01845	0.89652	0.01183		4.96913	0.87674	0.01174	0.85961	0.01705	0.87711	0.01772	0.88416	0.01189	0.89275	0.02295	0.88757	0.02051			0.01	2.0272			4.96913	0.87674	0.01174	0.86146	0.01279
	0.018	2.0462	2.0169			4.64421	0.92252	0.00618	0.89456	0.0288	0.89685	0.01839	0.89471	0.0121		4.64421	0.87368	0.01183	0.85827	0.01687	0.87403	0.01735	0.88322	0.0138	0.89357	0.02381	0.88328	0.02086			0.018	2.0939			4.64421	0.87368	0.01183	0.8617	0.01345
	0.027	2.0149	2.0044			4.34053	0.91946	0.00572	0.89542	0.02892	0.89804	0.01991	0.89097	0.01235		4.34053	0.87069	0.01195	0.85646	0.01717	0.87194	0.01757	0.87458	0.00505	0.8863	0.02373	0.88355	0.02115			0.027	2.0282			4.34053	0.87069	0.01195	0.85825	0.01349
	0.035	2.059	2.0083			3.79146	0.91289	0.00563	0.89067	0.02891	0.89652	0.02205	0.88398	0.01176		3.79146	0.86406	0.01237	0.85245	0.01726	0.86729	0.01896	0.86748	0.0058	0.88043	0.02348	0.87894	0.02201			0.035	2.0776			3.79146	0.86406	0.01237	0.85159	0.01364
	0.044	2.0663	2.0372			3.31184	0.90774	0.00534	0.88686	0.02895	0.89541	0.02168	0.8753	0.01226		3.31184	0.85806	0.01315	0.84915	0.01748	0.8658	0.01727	0.85801	0.00674	0.87241	0.02324	0.86435	0.02214			0.044	2.0811			3.31184	0.85806	0.01315	0.84467	0.01389
	0.052	2.0663	1.9629			2.52694	0.89466	0.00481	0.87203	0.02953	0.88505	0.02241	0.85909	0.01229		2.52694	0.84404	0.01473	0.83879	0.01788	0.85396	0.01696	0.83942	0.0107	0.85501	0.02402	0.85292	0.02052			0.052	2.0762			2.52694	0.84404	0.01473	0.83159	0.01438
	0.06	2.0405	1.9629			1.68416	0.8792	0.00367	0.85035	0.03111	0.87041	0.02263	0.83442	0.01255		1.68416	0.82921	0.01583	0.82552	0.01826	0.83925	0.01724	0.81757	0.01131	0.83543	0.02437	0.83691	0.01772			0.06	2.0497			1.68416	0.82921	0.01583	0.81597	0.01429
	0.072	2.0411	1.9933			1.28502	0.84999	0.00211	0.79847	0.03738	0.8469	0.02252	0.79811	0.01181		1.28502	0.80367	0.01695	0.79932	0.021	0.81912	0.02052	0.78228	0.01479	0.8048	0.02443	0.80552	0.01829			0.072	2.0443			1.28502	0.80367	0.01695	0.79025	0.01476
	0.077	2.0459	1.978			1.12247	0.83833	0.00431	0.77413	0.03961	0.83432	0.0216	0.7708	0.01079		1.12247	0.79594	0.01654	0.79047	0.02176	0.80806	0.01987	0.77154	0.01667	0.79415	0.02527	0.79366	0.01961			0.077	2.0233			1.12247	0.79594	0.01654	0.78041	0.01486
	0.085	2.0433	1.9839			0.65347	0.78428	0.00683	0.66757	0.05452	0.63157	0.05048	0.38769	0.03671		0.65347	0.74953	0.01322	0.74233	0.02354	0.56174	0.0344	0.72696	0.02913	0.73924	0.02683	0.74129	0.02053			0.085	2.0591			0.65347	0.74953	0.01322	0.73675	0.01599
	0.094	2.0498	2.0459			0.43553	0.73729	0.0061	0.49519	0.06798	0.25761	0.05043	0.18055	0.05733		0.43553	0.70499	0.01171	0.69527	0.02569	0.21907	0.06946	0.67921	0.0368	0.69394	0.02365	0.6832	0.02113			0.094	2.0583			0.43553	0.70499	0.01171	0.69274	0.01722
	0.102	2.0226	2.0018			0.33231	0.70256	0.00482	0.3385	0.06927	0.15227	0.03458	0.09441	0.02926		0.33231	0.66937	0.01227	0.66023	0.02676	0.13766	0.04699	0.6406	0.04185	0.65628	0.02421	0.63103	0.02183			0.102	2.0561			0.33231	0.66937	0.01227	0.65755	0.01771
	0.11	2.0329	1.9884			0.16899	0.60559	0.02766	0.13548	0.01691	0.08286	0.01638	0.06945	0.02124		0.16899	0.55879	0.00786	0.54564	0.0309	0.06627	0.01142	0.51433	0.05156	0.52449	0.02794	0.48169	0.01939			0.11	2.0417			0.16899	0.55879	0.00786	0.54652	0.02122
	0.119	2.0649	2.0158			0.11263	0.47038	0.01429	0.09763	0.01218	0.07655	0.01699	0.04294	0.0135		0.11263	0.4696	0.00803	0.46466	0.03249	0.05907	0.01152	0.41993	0.06073	0.42465	0.03298	0.39447	0.01824			0.119	2.0488			0.11263	0.4696	0.00803	0.45871	0.02105
	0.127	2.0404	2.0076			0.08593	0.4093	0.00712	0.08744	0.01334	0.06914	0.02146	0.03093	0.01608		0.08593	0.4034	0.00837	0.40247	0.02932	0.04798	0.00638	0.35969	0.05934	0.36137	0.03162	0.34459	0.01961			0.127	2.0844			0.08593	0.4034	0.00837	0.39215	0.02497
	0.135	2.0551	2.0074			0.0437	0.27562	0.0125	0.08504	0.01447	0.05572	0.01944	0.02215	0.01823		0.0437	0.27486	0.01215	0.27474	0.02502	0.0368	0.00459	0.23695	0.05069	0.23959	0.02484	0.19238	0.02108			0.135	2.092			0.0437	0.27486	0.01215	0.26081	0.02174
	0.144	2.077	1.9789			0.02222	0.18505	0.01462	0.08155	0.01501	0.05529	0.01675	0.00528	0.00489		0.02222	0.18859	0.00817	0.21511	0.02292	0.03935	0.00201	0.18091	0.02605	0.19084	0.02148	0.08715	0.00879			0.144	2.0321			0.02222	0.18859	0.00817	0.20362	0.01948
	0.152	2.0654	2.0047			0.0113	0.172	0.01083	0.08769	0.014	0.05317	0.0166	0.00158	0.000980906		0.0113	0.1752	0.00429	0.18854	0.02199	0.03712	0.00121	0.15923	0.01706	0.17075	0.01317	0.06591	0.01286			0.152	2.0483			0.0113	0.1752	0.00429	0.17699	0.01576
	0.161	2.0569	2.0037			0.00292	0.15206	0.00592	0.07743	0.01383	0.05389	0.0169	-0.00287	0.000701181		0.00292	0.15266	0.00755	0.18984	0.02297	0.03857	0.00567	0.152	0.01485	0.16541	0.00843	0.04299	0.0092			0.161	2.1005			0.00292	0.15266	0.00755	0.16393	0.01625
	0.169	2.0697	1.9971			0.00149	0.14871	0.00923	0.07731	0.01408	0.05815	0.01547	-0.00106	0.00197		0.00149	0.14893	0.01036	0.1798	0.02172	0.04636	0.00561	0.15594	0.01495	0.16504	0.00961	0.03146	0.01045			0.169	2.0577			0.00149	0.14893	0.01036	0.17645	0.01454
	0.177	2.0635	2.043													0.000755745	0.15014	0.00966	0.16814	0.0231	0.04321	0.00405	0.1486	0.00657	0.1517	0.0119	0.02619	0.01028			0.177	2.0321			0.000755745	0.15014	0.00966	0.15925	0.01277
	0.185	2.0338	2.0017													--	--	--	--	--	--	--	--	--	--	--					0.185	2.1457			--	--	--	--	--
	0.194	2.0421	2.0245													--	--	--	--	--	--	--	--	--	--	--					0.194	2.0792			--	--	--	--	--
	0.202	2.0569	2.0276																												0.202	2.0664
	0.21	2.0579	1.9873																												0.21	2.0172
	0.219	2.0776	2.0026																												0.219	2.0627
	0.227	2.077	1.9879																												0.227	2.0824
	0.235	2.0612	1.9796																												0.235	2.0933
	0.244	2.0704	2.0391																												0.244	2.081
	0.252	2.0676	2.0408																												0.252	2.0266
	0.26	2.0904	2.0264																												0.26	2.0318
	0.269	2.0832	2.0081																												0.269	2.0823
	0.277	2.0643	2.0165																												0.277	2.1168
	0.285	2.0724	2.0458																												0.285	2.1094
	0.294	2.0672	1.9828																												0.294	2.0739
	0.302	2.0507	1.9762																												0.302	2.1207
	0.31	2.0797	2.0225																												0.31	2.0671
	0.319	2.0671	1.9813																												0.319	2.0653
	0.327	2.0504	1.9991																												0.327	2.0959
	0.335	2.0361	2.0162																												0.335	2.0718
	0.344	2.0357	2.021																												0.344	2.1027
	0.352	2.0598	2.0166																												0.352	2.0448
	0.36	2.0551	1.9839																												0.36	2.0772
	0.369	2.0586	1.9823																												0.369	2.0592
	0.377	2.0586	2.0387																												0.377	2.0279
	0.385	2.042	2.0599																												0.385	2.035
	0.394	2.0717	2.0227																												0.394	2.0387
	0.402	2.0552	2.0253																												0.402	2.1012
	0.41	2.0625	1.9778																												0.41	2.0511
	0.419	2.0417	2.0135																												0.419	2.03
	0.427	2.0615	1.979																												0.427	2.0479
	0.435	2.03	1.9957																												0.435	2.0822
	0.444	2.0853	2.0098																												0.444	2.1108
	0.452	2.0569	1.9978																												0.452	2.0685
	0.46	2.0665	1.9912																												0.46	2.0353
	0.469	2.0902	2.0326																												0.469	2.0781
	0.477	2.0141	1.9983																												0.477	2.0737
	0.485	2.0389	1.9807																												0.485	2.0111
	0.494	2.0432	1.9963																												0.494	2.0267
	0.502	2.0423	1.9718																												0.502	2.0152
	0.51	2.0676	1.9924																												0.51	2.0721
	0.519	2.0937	2.0212																												0.519	2.0452
	0.527	2.0409	2.0029																												0.527	2.0893
	0.535	2.0497	2.0251																												0.535	2.1188
	0.544	2.0654	1.994																												0.544	2.0517
	0.552	2.0304	2.0154																												0.552	2.1065
	0.56	2.0617	1.9989																												0.56	2.0369
	0.569	2.0775	2.0154																												0.569	2.1201
	0.577	2.0549	1.9971																												0.577	2.0467
	0.585	2.0741	2.0145																												0.585	2.0233
	0.594	2.0698	2.003																												0.594	2.0555
	0.602	2.0471	1.9967																												0.602	2.0428
	0.61	2.0706	2.0226																												0.61	2.0702
	0.621	2.0498	1.9864																												0.621	2.002
	0.627	2.028	2.0151																												0.627	2.0832
	0.635	2.0737	1.9978																												0.635	2.0982
	0.643	2.0459	2.0074																												0.643	2.0619
	0.652	2.0288	1.9607																												0.652	2.0889
	0.66	2.1016	1.993																												0.66	2.0931
	0.669	2.0671	2.0173																												0.669	2.0165
	0.677	2.0391	2.0087																												0.677	2.0328
	0.685	2.048	2.0317																												0.685	2.0725
	0.693	2.0724	2.015																												0.693	2.0743
	0.702	2.063	1.9925																												0.702	2.075
	0.71	2.0646	2.0003																												0.71	2.0805
	0.719	2.0389	2.0038																												0.719	2.0671
	0.727	2.0568	1.9962																												0.727	2.0539
	0.735	2.0517	1.9949																												0.735	2.057
	0.743	2.0751	2.0109																												0.743	2.1029
	0.752	2.0334	2.0026																												0.752	2.0226
	0.76	2.0567	2.006																												0.76	2.0529
	0.768	2.0692	2.0327																												0.768	2.0168
	0.777	2.0793	2.0073																												0.777	2.0571
	0.785	2.0729	2.0365																												0.785	2.0491
	0.794	2.0324	1.9963																												0.794	2.0768
	0.802	2.0622	2.0015																												0.802	2.0281
	0.81	2.035	2.0485																												0.81	2.0989
	0.819	2.0344	1.979																												0.819	2.0127
	0.827	2.0517	1.9867																												0.827	2.0648
	0.835	2.0482	1.9688																												0.835	2.0645
	0.843	2.069	2.028																												0.843	2.0313
	0.852	2.08	2.0085																												0.852	2.0366
	0.86	2.0364	2.0561																												0.86	2.0222
	0.868	2.0662	2.0156																												0.868	2.057
	0.877	2.0627	2.0257																												0.877	2.0789
	0.885	2.0711	2.0197																												0.885	2.0126
	0.893	2.0673	1.998																												0.893	2.0145
	0.902	2.0438	2.0389																												0.902	2.0207
	0.91	2.0763	1.9655																												0.91	2.095
	0.918	2.0511	2.0199																												0.918	2.022
	0.927	2.0236	2.0117																												0.927	2.0641
	0.935	2.0682	2.0275																												0.935	2.0266
	0.943	2.039	1.9913																												0.943	2.0577
	0.952	2.0457	1.9649																												0.952	2.0334
	0.96	2.0689	2.0188																												0.96	2.1068
	0.968	2.0746	2.0292																												0.968	2.0465
	0.977	2.0675	2.0698																												0.977	2.0771
	0.985	2.0652	2.0203																												0.985	2.0597
	0.993	2.0621	2.047																												0.993	2.0425
	1.002	2.0459	1.994																												1.002	2.0187
	1.01	2.0664	1.9804																												1.01	2.0623
	1.018	2.0514	2.0103																												1.018	2.0351
	1.027	2.0872	2.0009																												1.027	2.1033
	1.035	2.0545	1.99																												1.035	2.0712
	1.043	2.0312	1.988																												1.043	2.0214
	1.052	2.0243	2.0034																												1.052	2.0477
	1.061	2.0767	1.9855																												1.061	2.0208
	1.068	2.0617	1.9866																												1.068	2.0481
	1.077	2.0868	2.0298																												1.077	2.0376
	1.085	2.0589	2.0263																												1.085	2.036
	1.093	2.0674	2.0505																												1.093	2.046
	1.102	2.0814	1.9759																												1.102	2.0529
	1.11	2.0682	2.0285																												1.11	2.0787
	1.119	2.0538	1.9819																												1.119	2.0656
	1.127	2.0664	2.0295																												1.127	2.0964
	1.135	2.0559	1.9861																												1.135	2.0418
	1.143	2.0658	2.0017																												1.143	2.082
	1.152	2.0748	2.0146																												1.152	2.0496
	1.16	2.0606	1.9776																												1.16	2.0637
	1.17	2.04	1.9884																												1.17	2.0686
	1.177	2.0404	1.9935																												1.177	2.0551
	1.185	2.0502	1.9755																												1.185	2.0751
	1.193	2.0756	2.0034																												1.193	2.0893
	1.202	2.0693	2.0052																												1.202	2.0288
	1.21	2.0341	1.9707																												1.21	2.0769
	1.218	2.0586	2.0144																												1.218	2.04
	1.227	2.0647	1.9963																												1.227	2.0668
	1.235	2.047	2.0014																												1.235	2.0786
	1.243	2.0533	2.0247																												1.243	2.1036
	1.252	2.0656	2.0098																												1.252	2.087
	1.26	2.0723	2.017																												1.26	2.0986
	1.268	2.0539	1.9956																												1.268	2.1288
	1.277	2.0402	1.9782																												1.277	2.0816
	1.285	2.0325	1.986																												1.285	2.1006
	1.293	2.0531	1.9751																												1.293	2.0456
	1.302	2.0243	1.9977																												1.302	2.0681
	1.31	2.0521	2.0097																												1.31	2.0432
	1.319	2.0143	1.9848																												1.319	2.0345
	1.327	2.0411	2.0036																												1.327	2.0367
	1.335	2.0554	1.9994																												1.335	2.0358
	1.344	2.0469	1.9759																												1.344	2.0935
	1.352	2.0744	1.967																												1.352	2.0558
	1.36	2.0864	2.0084																												1.36	2.0559
	1.368	2.0887	2.0173																												1.368	2.0764
	1.377	2.1003	2.0311																												1.377	2.0194
	1.385	2.0631	2.0171																												1.385	2.0325
	1.393	2.0669	2.007																												1.393	2.0237
	1.402	2.0487	2.0457																												1.402	2.0723
	1.41	2.0695	2.0276																												1.41	2.0351
	1.418	2.0598	2.0381																												1.418	2.0234
	1.427	2.0605	2.0137																												1.427	2.0896
	1.435	2.0762	1.9803																												1.435	2.0594
	1.443	2.0478	2.0082																												1.443	2.057
	1.452	2.0612	1.9666																												1.452	2.039
	1.46	2.0869	2.0208																												1.46	2.0363
	1.468	2.0212	1.9975																												1.468	2.0259
	1.477	2.0522	1.9977																												1.477	2.0277
	1.485	2.0731	1.9703																												1.485	2.0322
	1.493	2.0532	1.9983																												1.493	2.0245
	1.501	2.0697	1.9938																												1.501	1.9993
	1.51	2.0748	2.0263																												1.51	2.0794
	1.518	2.0739	2.0309																												1.518	2.0459
	1.527	2.0163	1.9819																												1.527	2.0882
	1.535	2.0611	1.996																												1.535	2.084
	1.543	2.0719	2.0025																												1.543	2.0142
	1.552	2.0293	2.0267																												1.552	2.0453
	1.56	2.0698	2.0013																												1.56	2.0052
	1.568	2.0552	1.9925																												1.568	2.0395
	1.576	2.0605	1.9571																												1.576	2.0236
	1.585	2.0491	1.9682																												1.585	2.0142
	1.593	2.0376	1.9623																												1.593	2.0166
	1.602	2.0427	2.0435																												1.602	2.005
	1.61	2.0524	1.9925																												1.61	2.0232
	1.618	2.0402	1.9962																												1.618	2.0292
	1.627	2.0586	2.0247																												1.627	2.0446
	1.635	2.0584	1.9955																												1.635	2.0307
	1.643	2.0307	1.9783																												1.643	2.0011
	1.652	2.0321	1.9879																												1.652	2.0585
	1.66	2.0444	1.9958																												1.66	2.0075
	1.668	2.0645	1.99																												1.668	2.058
	1.677	2.0284	1.9777																												1.677	2.0326
	1.685	2.0247	2.0103																												1.685	2.0341
	1.693	2.0725	2.0274																												1.693	2.0431
	1.702	2.0497	2.0218																												1.702	2.0364
	1.71	2.0639	2.0183																												1.71	2.0596
	1.72	2.0476	2.0093																												1.72	2.0076
	1.727	2.0655	2.0272																												1.727	2.0294
	1.735	2.0501	1.9757																												1.735	2.0762
	1.743	2.0466	2.0353																												1.743	2.0329
	1.752	2.0728	1.9962																												1.752	2.05
	1.76	2.0675	1.9756																												1.76	2.0253
	1.768	2.0837	2.0099																												1.768	2.0034
	1.777	2.0633	2.0144																												1.777	2.0447
	1.785	2.073	1.992																												1.785	2.0123
	1.793	2.0573	2.0076																												1.793	1.9997
	1.801	2.0727	1.9879																												1.801	2.029
	1.81	2.023	1.995																												1.81	2.0796
	1.818	2.0818	1.987																												1.818	2.0449
	1.826	2.0424	2.0155																												1.826	2.0447
	1.835	2.0455	2.0128																												1.835	2.0135
	1.843	2.0344	2.0622																												1.843	2.032
	1.851	2.0456	2.0426																												1.851	2.0577
	1.86	2.0338	1.9938																												1.86	2.0263
	1.868	2.0464	2.0272																												1.868	2.0359
	1.876	2.0402	2.0179																												1.876	2.0155
	1.885	2.0474	1.9922																												1.885	2.0656
	1.893	2.0589	1.9635																												1.893	2.0798
	1.901	2.0463	1.9623																												1.901	2.0362
	1.91	2.0536	1.9992																												1.91	2.0004
	1.918	2.0176	1.9942																												1.918	2.0604
	1.926	2.0267	1.9721																												1.926	2.0225
	1.935	2.0643	2.0226																												1.935	2.0415
	1.943	2.0402	2.0475																												1.943	2.0341
	1.951	2.0634	2.0128																												1.951	2.0497
	1.96	2.0667	2.0057																												1.96	2.0878
	1.968	2.0861	1.9981																												1.968	2.0507
	1.977	2.0599	2.0428																												1.977	2.0662
	1.985	2.0379	1.988																												1.985	2.0082
	1.993	2.0353	2.0161																												1.993	1.9744
	2.001	2.0519	1.994																												2.001	1.9976
	2.01	2.0656	2.0072																												2.01	2.0263
	2.018	2.053	2.016																												2.018	2.0335
	2.027	2.0656	2.029																												2.027	2.0325
	2.035	2.0659	1.9884																												2.035	2.0557
	2.043	2.0147	1.9863																												2.043	2.0356
	2.051	2.0685	1.9997																												2.051	2.0165
	2.06	2.0668	2.0269																												2.06	2.0213
	2.068	2.0398	1.9918																												2.068	2.0633
	2.077	2.0435	2.0413																												2.077	2.045
	2.085	2.0893	2.0065																												2.085	2.0292
	2.093	2.0687	1.998																												2.093	2.0608
	2.101	2.077	1.9976																												2.101	2.0598
	2.11	2.0362	2.0003																												2.11	2.0314
	2.118	2.0361	2.0339																												2.118	2.1025
	2.126	2.058	2.0352																												2.126	2.0869
	2.135	2.0558	2.0023																												2.135	2.0401
	2.143	2.0513	1.9798																												2.143	2.0278
	2.151	2.0566	2.0535																												2.151	2.0572
	2.16	2.0712	2.0256																												2.16	2.0512
	2.168	2.0425	2.01																												2.168	2.0174
	2.176	2.0408	1.978																												2.176	2.0413
	2.185	2.0226	2.0232																												2.185	2.0352
	2.193	2.0869	2.001																												2.193	2.049
	2.201	2.057	1.9911																												2.201	2.0083
	2.21	2.0434	2.0404																												2.21	2.0695
	2.218	2.0237	2.0551																												2.218	2.0497
	2.226	2.0238	2.0412																												2.226	2.067
	2.235	2.0548	2.054																												2.235	2.0576
	2.243	2.0292	1.9831																												2.243	2.0515
	2.251	2.0276	2.0068																												2.251	2.0495
	2.26	2.0285	2.0193																												2.26	2.0454
	2.27	2.0383	2.0064																												2.27	2.0652
	2.276	2.0114	2.0171																												2.276	2.034
	2.285	2.0463	1.988																												2.285	2.0203
	2.293	2.0527	1.9898																												2.293	2.0432
	2.302	2.0479	2.0327																												2.302	2.0618
	2.31	2.0437	2.0002																												2.31	2.0672
	2.318	2.0204	2.0194																												2.318	2.0669
	2.326	2.0772	2.0135																												2.326	2.0995
	2.335	2.0542	2.0067																												2.335	2.0587
	2.343	2.0247	1.9936																												2.343	2.0212
	2.351	2.0435	1.9882																												2.351	2.0297
	2.36	2.0558	2.0036																												2.36	2.024
	2.368	2.0223	2.0301																												2.368	2.0165
	2.376	2.067	2.0201																												2.376	2.0101
	2.385	2.0509	1.9816																												2.385	2.048
	2.393	2.0289	2.0126																												2.393	2.0489
	2.401	2.0295	1.9797																												2.401	2.0243
	2.41	2.027	1.9757																												2.41	2.078
	2.418	2.039	2.0087																												2.418	2.0119
	2.426	2.0789	2.0458																												2.426	2.0801
	2.435	2.0775	2.005																												2.435	2.0618
	2.443	2.0867	1.9796																												2.443	2.032
	2.451	2.0655	1.9967																												2.451	2.027
	2.46	2.0744	1.9729																												2.46	2.0729
	2.468	2.0286	1.9791																												2.468	2.0198
	2.476	2.0696	2.0092																												2.476	1.9997
	2.485	2.0574	2.011																												2.485	2.0636
	2.493	2.0233	1.9986																												2.493	2.0619
	2.501	2.0299	2.0001																												2.501	2.0123
	2.51	2.0378	1.987																												2.51	1.9913
	2.518	2.0447	1.9629																												2.518	1.9739
	2.526	2.0587	1.977																												2.526	2.0269
	2.535	2.0383	1.9969																												2.535	2.0952
	2.543	2.0393	2.0025																												2.543	2.0416
	2.551	2.0468	1.9886																												2.551	2.0486
	2.56	2.0315	2.0081																												2.56	2.0337
	2.568	2.0377	1.9836																												2.568	2.0488
	2.576	2.0623	1.9741																												2.576	2.0228
	2.585	2.0643	2.017																												2.585	2.038
	2.593	2.0579	2.0271																												2.593	2.0328
	2.601	2.0691	2.0422																												2.601	2.0298
	2.61	2.064	1.9815																												2.61	2.0053
	2.618	2.0689	1.9975																												2.618	2.0548
	2.626	2.0409	1.9673																												2.626	2.0568
	2.635	2.0684	2.0147																												2.635	2.0903
	2.643	2.0725	2.041																												2.643	1.9893
	2.651	2.0729	1.9947																												2.651	2.0719
	2.66	2.0601	2.047																												2.66	2.0622
	2.668	2.0619	2.0312																												2.668	2.056
	2.676	2.071	2.0702																												2.676	2.0856
	2.685	2.0582	2.0165																												2.685	2.045
	2.693	2.0694	2.0139																												2.693	2.0826
	2.701	2.0703	1.9887																												2.701	2.0546
	2.71	2.0371	2.039																												2.71	2.0522
	2.718	2.0598	2.0148																												2.718	2.0271
	2.726	2.0783	2.0168																												2.726	2.0216
	2.735	2.0811	2.0563																												2.735	2.0237
	2.743	2.0295	2.0199																												2.743	2.0272
	2.751	2.0474	1.9816																												2.751	2.0656
	2.76	2.0678	2.0302																												2.76	2.0156
	2.768	2.0169	1.9825																												2.768	2.0552
	2.776	2.0494	2.002																												2.776	2.0206
	2.785	2.0597	1.9934																												2.785	2.0616
	2.793	2.0647	2.0418																												2.793	1.9955
	2.801	2.0438	2.0031																												2.801	2.0511
	2.81	2.0596	2.0052																												2.81	2.0252
	2.82	2.0591	2.0295																												2.82	2.0414
	2.826	2.0599	2.0278																												2.826	2.0049
	2.835	2.0696	1.9947																												2.835	2.0459
	2.843	2.0412	1.9865																												2.843	2.0346
	2.851	2.0745	2.0277																												2.851	2.0571
	2.86	2.0335	2.0318																												2.86	2.0501
	2.868	2.0201	2.0473																												2.868	2.0773
	2.876	2.0871	2.044																												2.876	2.0731
	2.884	2.0817	2.0077																												2.884	2.0691
	2.893	2.0421	2.0595																												2.893	2.0618
	2.901	2.0347	2.0378																												2.901	2.0099
	2.91	2.0307	2.0123																												2.91	2.0372
	2.918	2.0521	2.0373																												2.918	2.0406
	2.926	2.0304	2.0583																												2.926	2.0374
	2.934	2.0426	2.0123																												2.934	2.0663
	2.943	2.0527	1.9927																												2.943	2.0607
	2.951	2.0621	2.0194																												2.951	2.0449
	2.96	2.0555	2.0039																												2.96	2.0185
	2.968	2.0535	2.0489																												2.968	1.993
	2.976	2.028	2.0062																												2.976	2.02
	2.984	2.066	1.9859																												2.984	2.0518
	2.993	2.0692	1.9883																												2.993	2.0249
	3.001	2.0622	1.9932																												3.001	2.0103
	3.009	2.0281	2.0371																												3.009	1.9913
	3.018	2.0533	2.0125																												3.018	2.0292
	3.026	2.0402	1.9853																												3.026	2.0458
	3.034	2.0728	1.9838																												3.034	2.0449
	3.043	2.0714	1.9858																												3.043	1.9903
	3.051	2.0389	1.983																												3.051	2.0106
	3.06	2.0728	2.0406																												3.06	2.0221
	3.068	2.0635	2.0584																												3.068	2.02
	3.076	2.0721	2.0179																												3.076	1.9838
	3.084	2.0489	2.0112																												3.084	2.0091
	3.093	2.0672	2.0037																												3.093	2.0302
	3.101	2.0368	1.9948																												3.101	2.0748
	3.109	2.0529	1.985																												3.109	2.0329
	3.118	2.0818	2.007																												3.118	2.1006
	3.126	2.069	1.9741																												3.126	2.0784
	3.134	2.0671	2.028																												3.134	2.0541
	3.143	2.0724	2.014																												3.143	2.0531
	3.151	2.0762	1.9863																												3.151	2.0371
	3.159	2.0355	1.9597																												3.159	2.0122
	3.168	2.0741	2.0139																												3.168	2.0368
	3.176	2.0518	2.0243																												3.176	2.0544
	3.184	2.0486	2.0076																												3.184	2.0663
	3.193	2.0354	2.0216																												3.193	2.0364
	3.201	2.0441	2.0028																												3.201	2.0116
	3.209	2.027	1.9966																												3.209	2.0128
	3.218	2.0719	2.0149																												3.218	2.0384
	3.226	2.077	1.9825																												3.226	2.0304
	3.235	2.0566	1.982																												3.235	2.0329
	3.243	2.0256	1.9765																												3.243	2.0221
	3.251	2.0593	2.0001																												3.251	2.0095
	3.267	2.0856	1.9754																												3.267	2.0279
	3.27	2.0415	2.0261																												3.27	2.0883
	3.277	2.0424	2.0334																												3.277	2.0352
	3.284	2.0365	2.0259																												3.284	2.0388
	3.293	2.077	2.0185																												3.293	1.9993
	3.301	2.0515	1.9863																												3.301	2.0081
	3.309	2.042	2.0114																												3.309	2.0288
	3.318	2.0418	1.9783																												3.318	2.027
	3.326	2.0767	2.0179																												3.326	2.0537
	3.334	2.056	1.9982																												3.334	2.0551
	3.343	2.0684	2.0132																												3.343	2.0494
	3.351	2.0753	1.9886																												3.351	2.0401
	3.359	2.0696	2.0431																												3.359	2.0594
	3.368	2.0651	2.0516																												3.368	2.0148
	3.376	2.0761	1.9951																												3.376	2.0519
	3.384	2.0752	2.0083																												3.384	2.0485
	3.393	2.044	2.0051																												3.393	2.0902
	3.401	2.0291	1.9685																												3.401	2.0621
	3.409	2.0455	2.0068																												3.409	2.0477
	3.418	2.0701	2.0311																												3.418	1.9903
	3.426	2.0602	1.9897																												3.426	2.0375
	3.434	2.0288	2.0472																												3.434	2.0522
	3.443	2.0627	1.9886																												3.443	2.0202
	3.453	2.0728	1.9706																												3.453	2.0768
	3.459	2.0674	1.9873																												3.459	2.0943
	3.468	2.0677	1.9608																												3.468	2.0694
	3.476	2.0693	1.9796																												3.476	2.055
	3.484	2.0836	2.0209																												3.484	2.0413
	3.493	2.0303	2.0026																												3.493	2.0703
	3.501	2.0272	1.9978																												3.501	2.0593
	3.509	2.0561	1.9866																												3.509	2.0409
	3.518	2.0729	2.0105																												3.518	2.0385
	3.526	2.0844	2.029																												3.526	2.013
	3.534	2.0299	2.0205																												3.534	2.0639
	3.543	2.0701	2.0623																												3.543	2.0148
	3.551	2.0183	2.0374																												3.551	2.0377
	3.559	2.0817	2.0075																												3.559	2.0282
	3.568	2.0368	2.0059																												3.568	2.0639
	3.576	2.0516	1.9879																												3.576	2.0506
	3.584	2.0431	2.0339																												3.584	2.0399
	3.593	2.0551	2.0152																												3.593	2.043
	3.601	2.0531	2.0095																												3.601	2.0347
	3.609	2.0618	2.0217																												3.609	2.0095
	3.618	2.0653	1.9794																												3.618	2.0465
	3.626	2.0353	2.0045																												3.626	2.0383
	3.634	2.0734	2.0146																												3.634	2.0425
	3.645	2.0746	1.9826																												3.645	2.0248
	3.651	2.0368	2.0143																												3.651	2.002
	3.659	2.0483	2.0184																												3.659	2.0078
	3.668	2.0387	2.0018																												3.668	2.0375
	3.676	2.0546	1.9945																												3.676	2.022
	3.684	2.0309	2.0181																												3.684	2.0264
	3.693	2.0312	2.0163																												3.693	2.0999
	3.701	2.0242	2.0343																												3.701	2.0562
	3.709	2.0617	2.0067																												3.709	2.0793
	3.718	2.0732	2.0255																												3.718	2.0883
	3.726	2.0711	2.0022																												3.726	2.036
	3.734	2.0827	1.9896																												3.734	2.0139
	3.743	2.0628	2.0113																												3.743	2.0541
	3.751	2.0631	1.9904																												3.751	1.9965
	3.759	2.0659	2.0188																												3.759	1.9944
	3.768	2.051	2.0056																												3.768	2.0132
	3.776	2.0489	1.9698																												3.776	2.0053
	3.784	2.0821	2.0042																												3.784	2.0668
	3.793	2.0758	2.0484																												3.793	2.0534
	3.801	2.0237	2.0006																												3.801	2.0159
	3.809	2.0249	1.9988																												3.809	2.0278
	3.818	2.0627	2.0377																												3.818	2.0398
	3.826	2.0702	2.0268																												3.826	2.0337
	3.834	2.0575	2.0275																												3.834	1.9959
	3.843	2.0132	2.0568																												3.843	2.0248
	3.851	2.0596	2.039																												3.851	2.012
	3.859	2.0861	2.0231																												3.859	2.0472
	3.868	2.0408	2.0123																												3.868	2.0398
	3.876	2.065	1.9777																												3.876	2.0253
	3.884	2.0618	2.001																												3.884	2.0544
	3.893	2.054	2.0079																												3.893	1.9984
	3.901	2.0587	1.9971																												3.901	2.0331
	3.909	2.0683	2.0248																												3.909	2.0188
	3.918	2.0413	1.9862																												3.918	2.0136
	3.926	2.038	2.0453																												3.926	2.0074
	3.934	2.053	2.0095																												3.934	2.0335
	3.943	2.0554	2.0078																												3.943	1.9896
	3.951	2.0664	1.9951																												3.951	2.0315
	3.959	2.0604	2.0152																												3.959	2.0273
	3.968	2.0708	1.9675																												3.968	2.0237
	3.976	2.0381	2.0163																												3.976	2.0473
	3.984	2.0378	2.0244																												3.984	2.0327
	3.993	2.0681	1.9785																												3.993	2.0382
	4.001	2.0372	1.9756																												4.001	2.0354
	4.009	2.0752	2.0149																												4.009	2.0601
	4.017	2.0518	2.0205																												4.017	2.0444
	4.026	2.0613	2.0246																												4.026	2.0601
	4.034	2.066	2.0136																												4.034	2.098
	4.043	2.0731	2.0368																												4.043	2.064
	4.051	2.0535	2.0024																												4.051	2.071
	4.059	2.0388	1.9849																												4.059	2.0626
	4.067	2.0416	1.9672																												4.067	2.0607
	4.076	2.0408	2.046																												4.076	2.0084
	4.085	2.0296	2.0122																												4.085	2.0386
	4.093	2.0551	1.9946																												4.093	2.0286
	4.101	2.0379	2.025																												4.101	2.0587
	4.109	2.0586	2.0283																												4.109	2.0583
	4.118	2.0678	2.0302																												4.118	2.0449
	4.126	2.0368	1.9852																												4.126	2.0563
	4.134	2.0741	2.0334																												4.134	2.0032
	4.142	2.039	1.9998																												4.142	2.0379
	4.151	2.0581	1.995																												4.151	2.0304
	4.159	2.0292	1.9861																												4.159	2.0664
	4.167	2.0726	2.0028																												4.167	2.0114
	4.176	2.0561	2.0246																												4.176	2.0161
	4.184	2.0475	2.0231																												4.184	2.0382
	4.192	2.0795	2.036																												4.192	2.0416
	4.201	2.0708	2.0235																												4.201	2.0279
	4.209	2.0409	2.0263																												4.209	2.0421
	4.218	2.0613	1.9892																												4.218	1.9991
	4.226	2.0703	2.0003																												4.226	1.9987
	4.234	2.0476	2.0208																												4.234	2.0441
	4.242	2.0541	2.0084																												4.242	2.0604
	4.251	2.0618	1.9949																												4.251	2.0435
	4.259	2.0712	1.9787																												4.259	2.0188
	4.267	2.0707	2.0149																												4.267	2.0596
	4.276	2.0516	2.0139																												4.276	2.0147
	4.284	2.0647	2.0163																												4.284	2.0248
	4.292	2.0558	1.9792																												4.292	2.0176
	4.301	2.0558	1.9602																												4.301	2.0459
	4.309	2.0791	1.9904																												4.309	2.0277
	4.317	2.0595	2.0143																												4.317	2.049
	4.326	2.049	1.9918																												4.326	2.0212
	4.334	2.0507	1.9876																												4.334	2.0694
	4.342	2.044	2.0084																												4.342	2.0412
	4.351	2.035	2.0251																												4.351	2.0434
	4.359	2.0655	2.0296																												4.359	2.0366
	4.367	2.0494	1.9963																												4.367	2.0609
	4.376	2.0354	2.0348																												4.376	2.0001
	4.384	2.0522	1.9816																												4.384	2.022
	4.393	2.0666	1.9977																												4.393	2.0212
	4.401	2.0354	2.0162																												4.401	2.0252
	4.409	2.046	1.9972																												4.409	2.0293
	4.418	2.0611	2.0049																												4.418	2.0645
	4.426	2.0816	1.9945																												4.426	2.0514
	4.434	2.0842	2.0502																												4.434	2.0611
	4.442	2.0581	2.0359																												4.442	2.04
	4.451	2.078	1.9666																												4.451	1.997
	4.459	2.0642	2.0006																												4.459	2.0244
	4.467	2.048	2.0024																												4.467	2.0829
	4.476	2.0533	1.9761																												4.476	2.0404
	4.484	2.0406	2.0034																												4.484	2.0308
	4.492	2.0395	2.0171																												4.492	2.056
	4.501	2.0679	2.0076																												4.501	2.0541
	4.509	2.0479	2.0067																												4.509	2.0182
	4.518	2.0726	1.9829																												4.518	2.0093
	4.526	2.0398	1.9937																												4.526	2.0389
	4.534	2.068	1.9844																												4.534	2.0213
	4.542	2.0544	1.9874																												4.542	2.0143
	4.551	2.0377	1.9783																												4.551	2.0475
	4.559	2.0333	2.0046																												4.559	2.0598
	4.567	2.0696	2.0189																												4.567	2.015
	4.576	2.0732	2.0409																												4.576	2.0445
	4.584	2.0443	1.969																												4.584	2.0421
	4.592	2.0632	1.9952																												4.592	2.0823
	4.601	2.0229	1.9565																												4.601	2.047
	4.609	2.0698	2.0037																												4.609	2.0072
	4.617	2.0589	2.0318																												4.617	1.9895
	4.626	2.0422	2.0222																												4.626	2.0195
	4.635	2.0648	2.0174																												4.635	2.0563
	4.642	2.0852	2.0157																												4.642	2.023
	4.651	2.0731	2.0218																												4.651	2.0536
	4.659	2.0778	1.99																												4.659	2.023
	4.667	2.0283	1.9904																												4.667	2.0167
	4.676	2.0431	2.0501																												4.676	2.0608
	4.684	2.053	2.0274																												4.684	2.0219
	4.692	2.0735	2.0067																												4.692	2.0424
	4.701	2.0694	2.0414																												4.701	2.0482
	4.709	2.0446	2.0183																												4.709	2.0333
	4.717	2.0321	1.9896																												4.717	2.092
	4.726	2.0868	1.9823																												4.726	2.042
	4.734	2.0709	2.0138																												4.734	2.024
	4.742	2.085	2.0396																												4.742	2.0897
	4.751	2.0745	2.0597																												4.751	2.0169
	4.759	2.0622	2.0205																												4.759	2.0671
	4.767	2.0352	1.9925																												4.767	2.0278
	4.776	2.0636	2.0031																												4.776	2.0133
	4.784	2.0602	2.005																												4.784	2.0063
	4.792	2.0594	2.023																												4.792	2.0271
	4.801	2.0656	2.0042																												4.801	2.0138
	4.809	2.0721	2.017																												4.809	2.0604
	4.817	2.0526	1.9945																												4.817	2.0624
	4.826	2.0345	2.0285																												4.826	1.9862
	4.834	2.0338	1.9925																												4.834	2.0489
	4.842	2.0751	1.996																												4.842	2.0209
	4.851	2.0788	1.9979																												4.851	2.0783
	4.859	2.0763	2.0193																												4.859	2.0151
	4.867	2.0535	2.0171																												4.867	2.0059
	4.876	2.0299	2.0158																												4.876	2.0052
	4.884	2.0771	1.9956																												4.884	2.038
	4.892	2.0748	2.0222																												4.892	2.0373
	4.901	2.0752	2.0224																												4.901	2.0037
	4.909	2.0221	2.0451																												4.909	2.0117
	4.917	2.0767	2.0004																												4.917	2.0063
	4.926	2.0721	1.9616																												4.926	2.0481
	4.934	2.0631	1.9909																												4.934	2.0378
	4.942	2.0292	2.0203																												4.942	2.036
	4.951	2.0673	2.0085																												4.951	2.0669
	4.959	2.0686	1.9562																												4.959	2.0433
	4.967	2.0668	2.004																												4.967	1.9927
	4.976	2.0764	1.9927																												4.976	2.0792
	4.984	2.045	1.983																												4.984	2.0364
	4.992	2.0582	2.0553																												4.992	2.0205
	5.001	2.0783	2.0305																												5.001	2.0419
	5.009	2.0545	2.0055																												5.009	2.0201
	5.017	2.0238	2.0544																												5.017	2.0498
	5.026	2.068	2.0256																												5.026	2.0393
	5.034	2.0586	2.0062																												5.034	2.0157
	5.042	2.0583	2.0034																												5.042	2.0381
	5.051	2.0741	2.0118																												5.051	2
	5.059	2.0736	2.0104																												5.059	2.0308
	5.067	2.0727	1.9921																												5.067	2.0148
	5.076	2.0754	1.9841																												5.076	2.0249
	5.084	2.0625	2.0002																												5.084	2.0345
	5.092	2.0699	1.9976																												5.092	2.0255
	5.101	2.077	1.9759																												5.101	2.0433
	5.109	2.0638	1.9922																												5.109	2.0208
	5.117	2.0628	1.9866																												5.117	2.0353
	5.125	2.0801	1.9989																												5.125	2.0374
	5.134	2.0861	2.0497																												5.134	2.0531
	5.142	2.0923	2.0222																												5.142	2.0327
	5.151	2.0439	1.9921																												5.151	2.0802
	5.159	2.0271	2.0036																												5.159	2.0277
	5.167	2.0718	2.0132																												5.167	2.0723
	5.175	2.0559	1.9969																												5.175	2.056
	5.185	2.0655	2.0061																												5.185	2.0504
	5.192	2.017	1.9972																												5.192	2.0397
	5.2	2.0399	2.0039																												5.2	2.0483
	5.209	2.0295	2.0089																												5.209	2.0369
	5.217	2.0432	2.0503																												5.217	2.0137
	5.226	2.0666	2.0574																												5.226	2.0467
	5.234	2.0685	1.9863																												5.234	2.0201
	5.242	2.0825	1.9909																												5.242	2.0542
	5.25	2.04	1.98																												5.25	2.0307
	5.259	2.051	2.0369																												5.259	2.0118
	5.267	2.0404	2.0202																												5.267	2.0259
	5.276	2.0165	2.0007																												5.276	2.0114
	5.284	2.0568	2.0455																												5.284	1.9875
	5.292	2.0462	2.0253																												5.292	2.0143
	5.301	2.064	1.9941																												5.301	2.0445
	5.309	2.0552	1.9918																												5.309	2.0464
	5.317	2.0594	2.0167																												5.317	2.0338
	5.325	2.0356	1.9944																												5.325	2.0485
	5.334	2.0403	2.053																												5.334	2.047
	5.342	2.0378	2.0301																												5.342	2.0697
	5.35	2.0956	1.9922																												5.35	1.9943
	5.359	2.0765	1.9972																												5.359	2.0266
	5.367	2.0751	2.0044																												5.367	2.0492
	5.375	2.0502	1.998																												5.375	2.0605
	5.384	2.068	2.0162																												5.384	2.0608
	5.392	2.0354	2.0323																												5.392	2.0494
	5.4	2.0542	2.0009																												5.4	2.0173
	5.409	2.0618	2.0254																												5.409	2.0561
	5.417	2.0572	1.9981																												5.417	2.0656
	5.425	2.0419	2.0004																												5.425	2.0384
	5.434	2.0427	1.9978																												5.434	2.0361
	5.442	2.0119	1.9968																												5.442	2.0278
	5.45	2.0691	1.9815																												5.45	2.0434
	5.459	2.0737	2.0152																												5.459	2.0756
	5.467	2.0402	2.0021																												5.467	2.0259
	5.476	2.0318	2.0031																												5.476	2.0251
	5.484	2.035	1.9783																												5.484	2.0194
	5.492	2.0221	2.0088																												5.492	2.0688
	5.5	2.0776	1.9981																												5.5	2.0521
	5.509	2.0613	2.0159																												5.509	2.0545
	5.517	2.0691	2.0199																												5.517	2.042
	5.525	2.0661	1.9933																												5.525	2.0429
	5.534	2.0317	1.9958																												5.534	2.0364
	5.542	2.0502	2.0046																												5.542	2.068
	5.55	2.0777	1.9894																												5.55	2.0105
	5.559	2.0462	2.0084																												5.559	2.0178
	5.567	2.0656	2.0527																												5.567	2.0319
	5.575	2.059	2.0366																												5.575	2.0441
	5.584	2.0713	2.0106																												5.584	2.0233
	5.592	2.0738	2.016																												5.592	2.0302
	5.6	2.081	1.9968																												5.6	2.0378
	5.609	2.0566	2.0078																												5.609	2.0044
	5.618	2.0328	1.9911																												5.618	2.0334
	5.626	2.0554	2.0071																												5.626	2.0307
	5.635	2.0783	1.9821																												5.635	2.0329
	5.643	2.0922	1.9788																												5.643	2.0242
	5.651	2.0237	2.0215																												5.651	2.0158
	5.66	2.0472	1.9862																												5.66	2.0518
	5.668	2.037	2.0424																												5.668	2.0431
	5.676	2.0295	2.0081																												5.676	2.012
	5.685	2.0714	1.9551																												5.685	1.9835
	5.693	2.0405	1.9783																												5.693	2.0238
	5.701	2.0651	2.0339																												5.701	2.0075
	5.71	2.0881	1.9895																												5.71	2.0617
	5.718	2.0602	1.9805																												5.718	2.0113
	5.727	2.0258	1.9915																												5.727	2.0153
	5.736	2.0558	2.0111																												5.736	2.0721
	5.743	2.0671	2.0506																												5.743	2.0666
	5.751	2.0459	1.9929																												5.751	2.0481
	5.76	2.0569	2.0143																												5.76	2.0541
	5.768	2.0376	1.9692																												5.768	2.024
	5.776	2.0692	2.0287																												5.776	2.0006
	5.785	2.0769	2.0053																												5.785	2.0353
	5.793	2.0494	2.0074																												5.793	2.0168
	5.801	2.0703	2.044																												5.801	2.0278
	5.81	2.0373	2.0364																												5.81	2.0248
	5.818	2.0443	2.0297																												5.818	1.9942
	5.826	2.0386	1.9799																												5.826	2.0246
	5.835	2.0273	1.9907																												5.835	1.994
	5.843	2.0185	1.985																												5.843	2.0374
	5.851	2.0543	1.9849																												5.851	2.0107
	5.86	2.0601	2.0219																												5.86	2.0288
	5.868	2.0618	2.0581																												5.868	2.0372
	5.876	2.0828	2.0153																												5.876	2.0301
	5.885	2.0495	2.0022																												5.885	2.0356
	5.893	2.049	1.9743																												5.893	1.9807
	5.901	2.0376	1.9892																												5.901	2.0454
	5.91	2.0645	1.9755																												5.91	2.0222
	5.918	2.0223	1.9976																												5.918	2.0625
	5.926	2.0397	1.9844																												5.926	2.0467
	5.935	2.0365	1.9809																												5.935	2.009
	5.943	2.0358	1.9871																												5.943	1.991
	5.951	2.0379	2.0098																												5.951	2.0501
	5.96	2.0937	2.0027																												5.96	2.03
	5.968	2.062	2.0293																												5.968	2.0604
	5.976	2.0801	2.0144																												5.976	2.0611
	5.985	2.0374	1.9959																												5.985	2.0169
	5.993	2.029	2.0344																												5.993	2.008
	6.001	2.0077	2.0398																												6.001	2.0094
	6.01	2.0628	2.0292																												6.01	2.0584
	6.018	2.043	2.0217																												6.018	2.0431
	6.026	2.0156	2.0308																												6.026	2.043
	6.035	2.0803	1.9814																												6.035	2.0174
	6.043	2.0539	2.023																												6.043	2.0148
	6.051	2.0639	2.0052																												6.051	2.0066
	6.06	2.0397	2.0092																												6.06	2.038
	6.068	2.0156	2.0012																												6.068	1.9872
	6.076	2.0366	2.0213																												6.076	2.0513
	6.085	2.0713	2.053																												6.085	2.0188
	6.093	2.0647	2.0043																												6.093	2.0104
	6.101	2.0576	2.0136																												6.101	2.0161
	6.11	2.0502	2.0231																												6.11	2.0505
	6.118	2.0454	2.0051																												6.118	2.0516
	6.126	2.0724	2.0608																												6.126	2.0097
	6.135	2.0603	2.0311																												6.135	2.01
	6.143	2.0762	2.0515																												6.143	2.029
	6.151	2.0304	2.0141																												6.151	2.0205
	6.16	2.0536	2.037																												6.16	2.0285
	6.168	2.0636	1.9493																												6.168	2.0342
	6.176	2.0775	1.9776																												6.176	2.0079
	6.185	2.0414	1.9757																												6.185	1.9981
	6.193	2.0384	2.0387																												6.193	2.0031
	6.201	2.028	1.9881																												6.201	2.0344
	6.21	2.015	1.9935																												6.21	2.0279
	6.218	2.0479	2.0045																												6.218	2.0055
	6.226	2.0604	1.9724																												6.226	1.9984
	6.235	2.0782	2.012																												6.235	2.0108
	6.243	2.0515	1.9928																												6.243	2.0023
	6.251	2.026	1.9989																												6.251	2.0413
	6.259	2.0626	1.9995																												6.259	2.0467
	6.268	2.0567	1.9925																												6.268	2.0927
	6.276	2.0443	1.9804																												6.276	2.0264
	6.286	2.0582	2.0232																												6.286	2.0452
	6.293	2.0497	2.0089																												6.293	2.0385
	6.301	2.0248	2.0008																												6.301	2.0413
	6.31	2.0608	2.043																												6.31	2.0257
	6.318	2.0592	2.0008																												6.318	2.0201
	6.326	2.0781	1.9871																												6.326	1.9969
	6.335	2.0832	1.9644																												6.335	2.0328
	6.343	2.0559	2.0139																												6.343	2.0406
	6.351	2.0195	1.9714																												6.351	2.0203
	6.359	2.0624	1.9996																												6.359	2.0345
	6.368	2.0595	1.9806																												6.368	2.0292
	6.376	2.0654	2.012																												6.376	2.0273
	6.384	2.0503	1.9715																												6.384	2.0628
	6.393	2.0691	1.9871																												6.393	1.9923
	6.401	2.0633	1.988																												6.401	2.0487
	6.409	2.0055	1.974																												6.409	2.0203
	6.418	2.0483	2.0049																												6.418	2.0047
	6.426	2.0758	1.9754																												6.426	2.0562
	6.435	2.0865	1.9884																												6.435	2.0262
	6.443	2.0694	1.9951																												6.443	2.0237
	6.451	2.0488	2.0115																												6.451	1.9885
	6.459	2.0641	2.0059																												6.459	2.0269
	6.468	2.0649	2.0264																												6.468	2.0653
	6.476	2.0585	1.982																												6.476	2.057
	6.485	1.9424	1.9861																												6.485	2.053
	6.493	2.0187	1.9881																												6.493	2.0523
	6.501	2.0137	1.9832																												6.501	2.0633
	6.509	2.0679	2.0117																												6.509	2.0183
	6.518	2.0762	1.9928																												6.518	2.025
	6.526	2.0537	1.9849																												6.526	2.0364
	6.534	2.0685	1.9819																												6.534	2.0141
	6.543	2.0663	1.9941																												6.543	2.0329
	6.551	2.0457	1.969																												6.551	2.0269
	6.559	2.045	1.986																												6.559	2.0546
	6.568	2.0874	1.9838																												6.568	2.0397
	6.576	2.0267	2.0014																												6.576	2.0133
	6.584	2.0237	2.0153																												6.584	2.0341
	6.593	2.0686	1.9769																												6.593	2.0101
	6.601	2.0555	1.9551																												6.601	2.0311
	6.609	2.0418	1.992																												6.609	2.0317
	6.618	2.0663	1.9747																												6.618	2.051
	6.626	2.0764	1.9979																												6.626	2.0253
	6.634	2.0101	1.9919																												6.634	2.0638
	6.643	2.0551	1.9996																												6.643	2.0422
	6.651	2.0741	2.0466																												6.651	2.0092
	6.659	2.0543	2.0481																												6.659	2.005
	6.668	2.0285	2.0449																												6.668	2.0349
	6.676	2.0557	2.0434																												6.676	1.9954
	6.684	2.0431	1.9791																												6.684	2.0553
	6.693	2.0604	1.9676																												6.693	2.0248
	6.701	2.0433	2.0462																												6.701	1.9906
	6.709	2.0616	2.037																												6.709	2.0314
	6.718	2.0268	2.0371																												6.718	2.0543
	6.726	2.0727	2.003																												6.726	2.0351
	6.734	2.0833	2.0087																												6.734	2.0401
	6.743	2.073	1.9846																												6.743	2.0405
	6.751	2.0607	1.983																												6.751	2.0659
	6.759	2.0529	1.9573																												6.759	2.0374
	6.768	2.054	2.005																												6.768	2.0199
	6.776	2.0719	2.011																												6.776	2.0299
	6.784	2.0415	1.9998																												6.784	2.0672
	6.793	2.0729	2.0254																												6.793	2.0349
	6.801	2.0468	1.9801																												6.801	2.0378
	6.809	2.0169	1.997																												6.809	2.0286
	6.818	2.0333	1.9973																												6.818	2.0416
	6.826	2.0325	2.0041																												6.826	2.0288
	6.836	2.0364	2.0063																												6.836	2.0133
	6.843	2.0354	1.9649																												6.843	2.0193
	6.851	2.0239	2.0211																												6.851	2.0435
	6.859	2.0421	2.0321																												6.859	2.0193
	6.868	2.0231	2.0068																												6.868	1.9995
	6.876	2.0509	2.0008																												6.876	2.0404
	6.884	2.014	2.0312																												6.884	2.0628
	6.893	2.0712	2.0031																												6.893	2.0018
	6.901	2.0541	1.9746																												6.901	2.0104
	6.909	2.0564	1.9925																												6.909	2.0358
	6.918	2.0547	1.9883																												6.918	2.0081
	6.926	2.02	1.9892																												6.926	2.0728
	6.934	2.061	1.9704																												6.934	2.0018
	6.943	2.0592	2.0567																												6.943	2.0306
	6.951	2.0234	1.9943																												6.951	1.9886
	6.959	2.0362	2.0127																												6.959	2.041
	6.968	2.0379	2.0365																												6.968	2.05
	6.976	2.041	2.0523																												6.976	2.0433
	6.984	2.0463	1.9955																												6.984	2.0519
	6.993	2.0476	1.9954																												6.993	2.0491
	7.001	2.0366	2.0316																												7.001	2.0572
	7.009	2.0287	2.0387																												7.009	2.0348
	7.018	2.0402	2.0363																												7.018	2.056
	7.026	2.0223	2.0295																												7.026	2.0372
	7.034	2.0155	2.0017																												7.034	2.032
	7.043	2.0457	1.9819																												7.043	2.025
	7.051	2.0144	2.0082																												7.051	2.0402
	7.059	2.0632	1.9996																												7.059	2.0178
	7.068	2.0305	2.0182																												7.068	2.0057
	7.076	2.0598	2.0207																												7.076	2.0529
	7.084	2.0638	1.9728																												7.084	2.018
	7.093	2.0576	2.0015																												7.093	2.0029
	7.101	2.0382	2.0123																												7.101	1.9993
	7.109	2.0545	2.02																												7.109	2.0327
	7.118	2.0616	2.0333																												7.118	2.0134
	7.126	2.049	1.9788																												7.126	2.0592
	7.134	2.0595	1.9914																												7.134	2.038
	7.143	2.0267	1.9919																												7.143	2.0414
	7.151	2.0438	1.9609																												7.151	1.9805
	7.159	2.0161	2.0122																												7.159	2.0387
	7.168	2.0535	1.9871																												7.168	2.0259
	7.176	2.0548	2.0333																												7.176	2.0271
	7.184	2.0075	2.0349																												7.184	2.052
	7.193	2.0353	1.9846																												7.193	2.0296
	7.201	2.0708	1.9971																												7.201	2.0235
	7.209	2.039	2.0078																												7.209	2.0395
	7.218	2.0358	2.0237																												7.218	2.0387
	7.226	2.0396	2.0541																												7.226	1.9974
	7.234	2.0463	2.0418																												7.234	2.0023
	7.243	2.0379	1.9943																												7.243	2.0288
	7.251	2.071	2.0064																												7.251	2.0591
	7.259	2.0684	2.0259																												7.259	1.9988
	7.268	2.0557	2.0274																												7.268	1.9994
	7.276	2.0226	1.9926																												7.276	2.0011
	7.284	2.0279	1.9841																												7.284	2.0274
	7.293	2.0773	2.0215																												7.293	1.9964
	7.301	2.0262	1.9714																												7.301	2.037
	7.309	2.082	1.9833																												7.309	2.0362
	7.318	2.0216	1.9919																												7.318	2.0247
	7.326	2.0638	1.9681																												7.326	2.0529
	7.334	2.0334	1.988																												7.334	2.0293
	7.343	2.0512	2.0179																												7.343	2.0118
	7.351	2.0622	1.9842																												7.351	2.0524
	7.359	2.0576	2.0074																												7.359	2.0135
	7.367	2.0211	1.9841																												7.367	2.041
	7.376	2.0095	2.0045																												7.376	2.0479
	7.386	2.0074	2.0002																												7.386	2.0271
	7.393	2.0459	1.9676																												7.393	2.0294
	7.401	2.0445	1.984																												7.401	2.0357
	7.409	2.0533	2.004																												7.409	2.0631
	7.418	2.0338	1.9552																												7.418	2.0218
	7.426	2.0096	2.0041																												7.426	2.0128
	7.434	2.0757	1.9771																												7.434	2.0326
	7.443	2.0338	2.0054																												7.443	2.0342
	7.451	2.0196	1.9854																												7.451	2.0437
	7.459	2.0814	1.9872																												7.459	2.0428
	7.467	2.0454	2.0014																												7.467	2.014
	7.476	2.0485	1.9746																												7.476	2.0066
	7.484	2.0544	1.9959																												7.484	2.0598
	7.493	2.0325	1.9853																												7.493	1.9741
	7.501	2.0613	1.9994																												7.501	2.0094
	7.509	2.0437	2.0166																												7.509	2.0222
	7.518	2.0531	2.0047																												7.518	2.0595
	7.526	2.0513	2.0059																												7.526	2.061
	7.534	2.0174	2.0226																												7.534	2.0383
	7.542	2.0558	1.9666																												7.542	2.0055
	7.551	2.0453	2.0321																												7.551	2.0176
	7.559	2.0698	1.9976																												7.559	2.0187
	7.567	2.0742	1.9966																												7.567	2.0172
	7.576	2.0366	1.9763																												7.576	2.0368
	7.584	2.0566	2.0055																												7.584	1.9899
	7.592	2.0382	2.0002																												7.592	2.0163
	7.601	2.0448	1.9868																												7.601	2.0255
	7.609	2.0814	1.9931																												7.609	1.9961
	7.617	2.03	2.0084																												7.617	2.0224
	7.626	2.0452	1.9798																												7.626	2.0481
	7.634	2.0316	1.9853																												7.634	2.0211
	7.642	2.0701	1.9899																												7.642	2.039
	7.651	2.0635	1.9565																												7.651	2.0102
	7.659	2.0211	1.9961																												7.659	2.0025
	7.667	2.0287	1.9951																												7.667	2.0025
	7.676	2.0601	2.0527																												7.676	2.047
	7.684	2.0424	2.0249																												7.684	2.0437
	7.692	2.0429	2.0408																												7.692	2.0092
	7.701	2.0463	2.0198																												7.701	2.0418
	7.709	2.0666	2.0173																												7.709	1.9863
	7.717	2.0746	2.0047																												7.717	2.0356
	7.726	2.0611	1.9833																												7.726	2.0332
	7.734	2.0361	2.0009																												7.734	2.0339
	7.742	2.033	1.9771																												7.742	2.0189
	7.751	2.0599	1.9655																												7.751	1.9999
	7.759	2.0405	1.972																												7.759	2.045
	7.767	2.0591	2.0321																												7.767	2.0504
	7.776	2.0737	2.0017																												7.776	2.0383
	7.784	2.0673	1.9756																												7.784	2.0154
	7.792	2.0543	1.988																												7.792	2.036
	7.801	2.066	1.992																												7.801	2.0211
	7.809	2.0446	1.9851																												7.809	2.0367
	7.817	2.0605	2.0061																												7.817	2.0259
	7.826	2.0665	1.9733																												7.826	2.0114
	7.834	2.0336	2.0136																												7.834	2.0311
	7.842	2.0824	2.0109																												7.842	2.0234
	7.851	2.0394	1.9988																												7.851	2.0236
	7.859	2.0622	1.9711																												7.859	2.0183
	7.867	2.0449	1.9641																												7.867	2.0167
	7.876	2.04	1.9638																												7.876	2.0413
	7.884	2.0752	1.9876																												7.884	2.0243
	7.892	2.0571	2.0063																												7.892	2.039
	7.901	2.0311	2.0077																												7.901	2.0112
	7.909	2.0413	1.9857																												7.909	1.9872
	7.917	2.0375	1.976																												7.917	2.0184
	7.926	2.0614	2.0183																												7.926	2.0333
	7.936	2.0275	1.9911																												7.936	1.9983
	7.942	2.063	1.9949																												7.942	2.0683
	7.951	2.0385	1.9629																												7.951	2.0234
	7.959	2.0579	1.9975																												7.959	2.0561
	7.967	2.0352	2.0047																												7.967	2.0276
	7.976	2.0495	2.0069																												7.976	2.029
	7.984	2.0534	1.9806																												7.984	1.9959
	7.992	2.0594	1.9951																												7.992	2.0157
	8.001	2.0715	2.0021																												8.001	2.0221
	8.009	2.0424	1.9912																												8.009	2.0116
	8.017	2.0408	2.0034																												8.017	2.02
	8.026	2.054	2.0259																												8.026	2.006
	8.034	2.0525	2.0256																												8.034	2.0042
	8.042	2.0446	1.9908																												8.042	2.0423
	8.051	2.0774	1.9867																												8.051	1.9998
	8.059	2.0564	2.0023																												8.059	2.0305
	8.067	2.0495	1.9907																												8.067	2.0439
	8.076	2.0475	1.9765																												8.076	2.0073
	8.084	2.0939	2.0721																												8.084	2.0287
	8.092	2.0495	1.9833																												8.092	1.985
	8.101	2.066	1.9894																												8.101	2.0495
	8.109	2.0236	2.0183																												8.109	2.0507
	8.117	2.0758	2.0265																												8.117	2.05
	8.126	2.0736	2.0093																												8.126	2.0232
	8.134	2.0678	2.0447																												8.134	2.0252
	8.142	2.0762	2.0594																												8.142	2.0328
	8.151	2.0713	1.993																												8.151	2.0371
	8.159	2.0424	2.0205																												8.159	2.0272
	8.167	2.038	2.0047																												8.167	1.9994
	8.176	2.0481	2.0007																												8.176	2.035
	8.184	2.027	1.9983																												8.184	2.034
	8.192	2.0614	2.0071																												8.192	2.002
	8.201	2.0775	1.9961																												8.201	1.9992
	8.209	2.0133	1.9927																												8.209	2.0613
	8.217	2.0021	2.0081																												8.217	2.0287
	8.226	2.0642	1.9741																												8.226	2.0446
	8.234	2.0838	1.9932																												8.234	2.0242
	8.242	2.0867	1.9914																												8.242	2.0423
	8.251	2.0759	2.0119																												8.251	2.0786
	8.259	2.0753	2.0356																												8.259	2.0571
	8.267	2.0646	1.9881																												8.267	2.0011
	8.276	2.0203	1.9939																												8.276	2.0122
	8.284	2.0744	1.9864																												8.284	2.0165
	8.292	2.0926	1.9724																												8.292	2.0238
	8.301	2.0485	2.0086																												8.301	2.0385
	8.309	2.0553	2.005																												8.309	2.0232
	8.317	2.0497	2.0445																												8.317	2.0181
	8.326	2.0125	2.0419																												8.326	2.0407
	8.334	2.0417	1.9987																												8.334	2.0269
	8.342	2.0637	1.9737																												8.342	2.0272
	8.351	2.0585	2.0455																												8.351	1.9992
	8.359	2.0256	1.985																												8.359	2.0498
	8.367	2.0588	1.9884																												8.367	2.0303
	8.376	2.0365	2.0131																												8.376	2.0639
	8.384	2.041	2.0104																												8.384	2.0434
	8.392	2.0524	2.0407																												8.392	1.9823
	8.401	2.072	2.0476																												8.401	2.034
	8.409	2.0393	2.0027																												8.409	2.0025
	8.417	2.0562	2.0077																												8.417	2.0269
	8.426	2.0498	2.0032																												8.426	2.0368
	8.434	2.0555	2.0093																												8.434	2.0404
	8.442	2.051	1.9842																												8.442	2.0108
	8.451	2.0644	2.0048																												8.451	2.0121
	8.459	2.075	1.9752																												8.459	2.0042
	8.467	2.0714	1.9964																												8.467	2.0174
	8.476	2.062	2.0519																												8.476	2.0235
	8.486	2.0598	2.06																												8.486	2.0259
	8.492	2.0589	2.0147																												8.492	2.0235
	8.501	2.0697	2.0243																												8.501	2.0349
	8.509	2.0686	1.9911																												8.509	2.0146
	8.517	2.0792	1.988																												8.517	2.0229
	8.525	2.0253	1.9734																												8.525	2.0167
	8.534	2.0501	1.9947																												8.534	2.0176
	8.542	2.0517	1.9994																												8.542	2.0454
	8.55	2.0401	1.9948																												8.55	2.0386
	8.559	2.0358	1.9844																												8.559	2.0391
	8.567	2.0478	2.0018																												8.567	2.0027
	8.576	2.0497	1.9923																												8.576	2.0604
	8.584	2.0491	1.9997																												8.584	2.0056
	8.592	2.0791	1.9712																												8.592	2.0265
	8.6	2.0572	2.0019																												8.6	2.0398
	8.609	2.0264	1.9769																												8.609	2.0112
	8.617	2.0457	2.0027																												8.617	2.0294
	8.625	2.0706	2.0054																												8.625	2.0202
	8.634	2.042	2.0046																												8.634	2.0237
	8.642	2.0198	2.0191																												8.642	2.0314
	8.65	2.0328	1.9932																												8.65	2.0134
	8.659	2.0729	2.0089																												8.659	2.0076
	8.667	2.0531	1.9736																												8.667	2.05
	8.676	2.0802	1.9481																												8.676	2.011
	8.684	2.0736	2.0193																												8.684	2.0391
	8.692	2.0837	1.9808																												8.692	2.0555
	8.7	2.044	2.0047																												8.7	2.0239
	8.709	2.0651	2.0119																												8.709	2.0213
	8.717	2.0771	1.9619																												8.717	2.0397
	8.726	2.0397	1.9858																												8.726	2.0766
	8.734	2.0812	2.0082																												8.734	2
	8.742	2.0297	2.0114																												8.742	2.0388
	8.751	2.0496	2.0028																												8.751	2.0601
	8.759	2.0476	1.9708																												8.759	2.0195
	8.767	2.0166	2.004																												8.767	2.0115
	8.776	2.0809	2.0008																												8.776	2.0367
	8.784	2.0828	1.9623																												8.784	2.0495
	8.792	2.0598	1.9911																												8.792	2.0198
	8.8	2.0783	2.0162																												8.8	2.0308
	8.809	2.0949	1.9806																												8.809	2.047
	8.817	2.0636	2.0111																												8.817	2.0156
	8.825	2.0733	1.9825																												8.825	2.0063
	8.834	2.0615	2.0304																												8.834	2.0319
	8.842	2.0708	1.9874																												8.842	2.0573
	8.85	2.0537	2.0045																												8.85	2.0405
	8.859	2.0458	2.0081																												8.859	2.0012
	8.867	2.0281	1.9949																												8.867	2.0108
	8.875	2.0628	2.0099																												8.875	2.0438
	8.884	2.0667	2.015																												8.884	2.0251
	8.892	2.0458	1.9958																												8.892	2.0044
	8.901	2.0034	2.0138																												8.901	2.0202
	8.909	2.0524	1.9794																												8.909	2.0453
	8.917	2.0664	2.0031																												8.917	2.0285
	8.929	2.0419	2.0015																												8.929	2.0263
	8.934	2.0506	2.0002																												8.934	2.0169
	8.942	2.0236	2.0345																												8.942	2.045
	8.95	2.0567	2.0506																												8.95	2.0369
	8.959	2.0286	2.0104																												8.959	2.0376
	8.967	2.0256	2.0552																												8.967	2.0042
	8.975	2.0531	2.0485																												8.975	2.0074
	8.984	2.0233	1.9758																												8.984	2.0079
	8.992	2.0506	2.0166																												8.992	2.052
	9	2.049	2.0218																												9	2.0575
	9.009	2.0582	2.0186																												9.009	2.0122
	9.017	2.0387	1.9934																												9.017	1.9995
	9.025	2.082	2.0267																												9.025	2.0381
	9.036	2.0393	1.9641																												9.036	2.0134
	9.042	2.0912	1.9632																												9.042	2.0389
	9.05	2.0697	2.0415																												9.05	2.0498
	9.059	2.0464	1.9941																												9.059	2.0358
	9.067	2.0294	2.0138																												9.067	2.0101
	9.075	2.0737	2.0281																												9.075	2.0794
	9.084	2.051	1.9838																												9.084	2.0485
	9.092	2.0431	2.0102																												9.092	2.0798
	9.1	2.0803	1.9983																												9.1	2.0407
	9.109	2.0526	2.0168																												9.109	2.0186
	9.117	2.0506	1.9748																												9.117	2.0478
	9.125	2.0703	1.9806																												9.125	1.9861
	9.134	2.0588	1.9901																												9.134	2.0121
	9.142	2.0802	2.0004																												9.142	2.0406
	9.15	2.0826	1.9788																												9.15	2.0182
	9.159	2.0254	1.9812																												9.159	2.0286
	9.167	2.0164	2.0397																												9.167	2.0297
	9.175	2.0301	2.0297																												9.175	2.0441
	9.184	2.0513	2.0198																												9.184	1.9914
	9.192	2.0511	1.9897																												9.192	2.0488
	9.2	2.0657	1.9704																												9.2	2.0064
	9.209	2.0743	2.0399																												9.209	2.0063
	9.217	2.0494	1.9815																												9.217	2.0262
	9.225	2.0736	1.9937																												9.225	2.0258
	9.234	2.0541	1.9772																												9.234	2.0607
	9.242	2.0684	1.9676																												9.242	2.0577
	9.25	2.0316	1.9877																												9.25	2.0039
	9.258	2.0536	1.9601																												9.258	2.0034
	9.267	2.0742	1.9492																												9.267	2.0422
	9.275	2.056	1.988																												9.275	2.0418
	9.284	2.0679	2.0004																												9.284	2.0522
	9.292	2.029	2.001																												9.292	2.0324
	9.3	2.0343	1.9736																												9.3	2.0013
	9.309	2.0444	1.9744																												9.309	2.0288
	9.317	2.034	2.0023																												9.317	2.0335
	9.325	2.0582	2.0296																												9.325	2.0198
	9.334	2.0565	2.0436																												9.334	2.0518
	9.342	2.0635	1.9984																												9.342	2.0245
	9.35	2.0788	1.9578																												9.35	2.027
	9.359	2.0545	1.9841																												9.359	2.0001
	9.367	2.059	1.9798																												9.367	2.047
	9.375	2.0749	2.0203																												9.375	2.028
	9.384	2.0532	1.9977																												9.384	2.0196
	9.392	2.0853	1.9882																												9.392	2.0208
	9.4	2.0634	1.9702																												9.4	2.0066
	9.409	2.0464	2.0165																												9.409	2.0296
	9.417	2.0558	2.031																												9.417	2.0096
	9.425	2.0599	1.9962																												9.425	2.0113
	9.434	2.0762	2.0168																												9.434	2.0484
	9.442	2.0773	1.9868																												9.442	2.0125
	9.45	2.0583	1.9687																												9.45	2.0301
	9.459	2.0641	1.9852																												9.459	2.0235
	9.467	2.0602	1.9737																												9.467	2.0253
	9.476	2.0656	2.0033																												9.476	2.059
	9.484	2.0341	1.9884																												9.484	2.0038
	9.492	2.0345	2.0136																												9.492	1.9898
	9.5	2.0713	1.9902																												9.5	2.0034
	9.509	2.071	1.9995																												9.509	2.0339
	9.517	2.0468	1.9684																												9.517	2.0267
	9.525	2.0482	2.0212																												9.525	2.0464
	9.534	2.0319	2.0135																												9.534	1.9976
	9.542	2.0508	2.0118																												9.542	1.9954
	9.55	2.0637	2.0065																												9.55	2.0187
	9.559	2.0644	2.0089																												9.559	2.0105
	9.567	2.0589	2.0186																												9.567	2.0401
	9.575	2.0742	2.0024																												9.575	2.0037
	9.584	2.0602	2.0148																												9.584	2.0451
	9.592	2.0624	2.0033																												9.592	2.0061
	9.6	2.0237	1.9926																												9.6	2.0066
	9.609	2.0293	2.04																												9.609	1.9932
	9.617	2.0559	1.9729																												9.617	2.0535
	9.625	2.0263	1.9957																												9.625	2.0299
	9.634	2.0491	1.972																												9.634	2.0015
	9.642	2.0557	2.0144																												9.642	2.0251
	9.65	2.0507	2.0062																												9.65	2.0275
	9.658	2.0618	1.9914																												9.658	2.0411
	9.667	2.0822	2.0142																												9.667	2.0038
	9.675	2.068	1.9974																												9.675	1.9963
	9.684	2.0225	2.0081																												9.684	2.0643
	9.692	2.076	2.0343																												9.692	2.0266
	9.7	2.0321	1.9784																												9.7	2.0374
	9.709	2.0336	1.9937																												9.709	2.0164
	9.717	2.0679	1.9924																												9.717	2.0194
	9.725	2.0227	1.9805																												9.725	2.0479
	9.734	2.0363	1.9976																												9.734	1.9998
	9.742	2.0468	2.0077																												9.742	2.0416
	9.75	2.0343	1.9754																												9.75	2.0485
	9.758	2.0514	2.0135																												9.758	2.0434
	9.767	2.0628	2.0118																												9.767	2.0414
	9.775	2.0749	2.0533																												9.775	2.0138
	9.783	1.9914	2.001																												9.783	1.9937
	9.792	2.0473	1.9856																												9.792	2.0136
	9.8	2.055	2.0107																												9.8	2.047
	9.808	2.0611	1.9859																												9.808	2.023
	9.817	2.0389	2.0381																												9.817	2.0009
	9.825	2.0699	2.0185																												9.825	2.0478
	9.833	2.0338	2.0127																												9.833	2.0393
	9.842	2.0228	1.986																												9.842	2.0392
	9.85	2.0419	2.018																												9.85	2.0191
	9.859	2.0285	1.9788																												9.859	2.0105
	9.867	2.0327	2.0466																												9.867	2.014
	9.875	2.0496	2.0129																												9.875	2.0521
	9.883	2.0664	2.0049																												9.883	2.0509
	9.892	2.0742	1.9841																												9.892	1.9962
	9.9	2.0437	1.9681																												9.9	2.0377
	9.908	2.0221	2.0005																												9.908	2.0383
	9.917	2.0586	2.0408																												9.917	1.9917
	9.925	2.0481	1.9971																												9.925	1.9963
	9.933	2.0569	1.9934																												9.933	2.0333
	9.942	2.0318	1.9912																												9.942	2.0632
	9.95	2.0683	1.989																												9.95	2.0067
	9.958	2.069	1.9794																												9.958	2.0203
	9.967	2.0567	1.9901																												9.967	2.0312
	9.975	2.0442	1.9904																												9.975	2.0223
	9.983	2.0549	1.9914																												9.983	2.0056
	9.992	2.0652	2.0014																												9.992	2.0309
	10	2.0201	2.0042																												10	2.0676
	10.008	2.0155	1.9691																												10.008	2.0179
	10.017	2.0626	2.0016																												10.017	2.0229
	10.026	2.0358	2.0214																												10.026	2.0414
	10.033	2.0437	1.9965																												10.033	2.017
	10.042	2.0463	2.0399																												10.042	2.0386
	10.05	2.0801	1.9868																												10.05	2.0053
	10.058	2.0495	1.9868																												10.058	2.0581
	10.067	2.0463	2.0544																												10.067	2.0236
	10.075	2.0413	2.0413																												10.075	2.0053
	10.083	2.078	2.0231																												10.083	2.0555
	10.092	2.043	1.9978																												10.092	2.0458
	10.1	2.0424	2.0324																												10.1	2.0261
	10.108	2.0411	1.9973																												10.108	2.0169
	10.117	2.0629	1.9878																												10.117	2.0422
	10.125	2.0527	2.0111																												10.125	1.9909
	10.133	2.0337	2.0009																												10.133	2.0226
	10.142	2.0546	2.0545																												10.142	2.0109
	10.15	2.0661	1.9908																												10.15	1.9685
	10.158	2.0551	1.9891																												10.158	2.0344
	10.167	2.0458	1.9879																												10.167	1.9989
	10.175	2.0591	1.9655																												10.175	2.0111
	10.183	2.0644	1.9536																												10.183	2.0104
	10.192	2.0314	1.9968																												10.192	2.0253
	10.2	2.0684	2.0117																												10.2	2.0222
	10.208	2.0735	1.9883																												10.208	2.0284
	10.217	2.0432	2.0028																												10.217	2.0374
	10.225	2.0445	1.9998																												10.225	2.0345
	10.233	2.0342	1.981																												10.233	1.996
	10.242	2.0554	2.0029																												10.242	2.0137
	10.25	2.0638	1.9929																												10.25	2.0119
	10.258	2.0531	1.9843																												10.258	2.0456
	10.267	2.0744	1.9817																												10.267	2.015
	10.275	2.0311	1.988																												10.275	2.0492
	10.283	2.0622	2.0513																												10.283	2.0155
	10.292	2.0584	1.9821																												10.292	2.0474
	10.3	2.052	2.0053																												10.3	2.0307
	10.308	2.0731	1.9795																												10.308	1.9794
	10.317	2.0572	1.9878																												10.317	2.0585
	10.325	2.0623	1.9824																												10.325	1.9915
	10.333	2.0608	2.0171																												10.333	2.0229
	10.342	2.0566	1.9979																												10.342	2.0105
	10.35	2.0581	2.0055																												10.35	2.0488
	10.358	2.0293	2.0086																												10.358	2.0137
	10.367	2.0662	2.0001																												10.367	2.001
	10.375	2.0375	1.9747																												10.375	2.0463
	10.383	2.0402	2.0016																												10.383	2.0524
	10.392	2.0404	2.0043																												10.392	2.0456
	10.4	2.0133	2.0042																												10.4	2.0214
	10.408	2.0559	1.9852																												10.408	2.0578
	10.417	2.0634	2.0001																												10.417	2.0359
	10.425	2.0468	2.0068																												10.425	2.0273
	10.433	2.0246	1.9902																												10.433	2.0118
	10.442	2.0579	2.0152																												10.442	2.0272
	10.45	2.0349	1.9806																												10.45	1.9953
	10.458	2.0698	1.9763																												10.458	2.0114
	10.467	2.0101	1.9948																												10.467	2.0273
	10.475	2.0567	2.0269																												10.475	1.972
	10.483	2.0424	1.9991																												10.483	2.0193
	10.492	2.073	2.0125																												10.492	2.0266
	10.5	2.044	1.9861																												10.5	2.0148
	10.508	2.042	1.988																												10.508	2.0164
	10.517	2.0203	1.997																												10.517	2.0109
	10.525	2.0284	1.9458																												10.525	2.0316
	10.533	2.0766	1.9818																												10.533	2.0556
	10.542	2.0539	2.0119																												10.542	1.9995
	10.55	2.0528	1.994																												10.55	2.0273
	10.558	2.0713	1.9734																												10.558	2.0131
	10.567	2.0459	1.9871																												10.567	2.0414
	10.576	2.0544	1.9665																												10.576	2.0593
	10.583	2.0473	1.9986																												10.583	2.0396
	10.592	2.0184	2.0086																												10.592	2.0193
	10.6	2.063	1.9962																												10.6	2.0451
	10.608	2.0611	1.9487																												10.608	2.0255
	10.617	2.013	1.9849																												10.617	1.9923
	10.625	2.0586	1.9741																												10.625	2.0197
	10.633	2.042	1.9849																												10.633	2.0231
	10.642	2.0354	1.9707																												10.642	2.0226
	10.65	2.0365	1.9747																												10.65	1.9772
	10.658	2.0621	1.9679																												10.658	2.0303
	10.667	2.0609	1.9986																												10.667	2.0438
	10.675	2.0613	1.9732																												10.675	2.0236
	10.683	2.0791	2.0019																												10.683	2.0077
	10.691	2.0394	1.9695																												10.691	2.0311
	10.7	2.028	1.9695																												10.7	2.0093
	10.708	2.0294	2.0338																												10.708	2.0285
	10.717	2.0313	1.9896																												10.717	2.0406
	10.725	2.0405	1.997																												10.725	2.0158
	10.733	2.0698	1.987																												10.733	2.011
	10.742	2.0204	1.9905																												10.742	2.0232
	10.75	2.0606	1.9873																												10.75	2.0145
	10.758	2.0428	1.979																												10.758	2.0428
	10.766	2.0612	1.9823																												10.766	2.0287
	10.775	2.0413	2.0136																												10.775	2.016
	10.783	2.0555	2.0002																												10.783	2.0128
	10.792	2.0561	2.0436																												10.792	2.0149
	10.8	2.0483	1.9531																												10.8	2.0216
	10.808	2.0288	2.0272																												10.808	2.012
	10.817	2.0406	1.9815																												10.817	2.0265
	10.825	2.0219	1.9766																												10.825	2.0198
	10.833	2.0575	1.9685																												10.833	2.0379
	10.842	2.0448	1.9711																												10.842	1.9636
	10.85	2.014	1.9787																												10.85	2.0321
	10.858	2.0738	2.003																												10.858	2.0336
	10.866	2.0006	1.987																												10.866	2.0503
	10.875	2.0704	2.004																												10.875	2.027
	10.883	2.0727	1.9758																												10.883	2.0322
	10.891	2.0661	2.0085																												10.891	2.0294
	10.9	2.0618	1.9824																												10.9	2.0374
	10.908	2.04	2.0277																												10.908	2.0497
	10.917	2.0641	2.0268																												10.917	2.0446
	10.925	2.0325	2.0026																												10.925	2.0253
	10.933	2.0704	1.9973																												10.933	2.058
	10.942	2.0617	2.0027																												10.942	2.0412
	10.95	2.0396	1.9989																												10.95	2.0262
	10.958	2.0294	1.9787																												10.958	2.0737
	10.966	2.0657	1.9812																												10.966	2.0433
	10.975	2.0346	2.0077																												10.975	1.9915
	10.983	2.0449	1.9872																												10.983	2.0091
	10.991	2.0362	1.9743																												10.991	2.0372
	11	2.0521	1.9959																												11	2.023
	11.008	2.0635	1.998																												11.008	2.0579
	11.016	2.0292	2.0489																												11.016	2.0216
	11.025	2.0455	2.0046																												11.025	1.9794
	11.033	2.0574	1.9868																												11.033	1.989
	11.042	2.0677	1.9958																												11.042	2.0119
	11.05	2.0472	2.0238																												11.05	2.0014
	11.058	2.0801	1.9987																												11.058	2.0159
	11.066	2.0677	2.0245																												11.066	2.0188
	11.075	2.0631	1.9784																												11.075	1.9977
	11.083	2.0553	1.9964																												11.083	2.0316
	11.092	2.0712	2																												11.092	1.999
	11.1	2.029	1.9872																												11.1	2.0262
	11.108	2.018	1.9883																												11.108	2.0275
	11.116	2.0477	1.9899																												11.116	2.0246
	11.126	2.0618	2.0493																												11.126	2.0301
	11.133	2.0558	1.9905																												11.133	2.0401
	11.141	2.0885	1.9819																												11.141	2.0278
	11.15	2.0664	1.9771																												11.15	2.0409
	11.158	2.0461	2.01																												11.158	2.0266
	11.166	2.0306	1.9921																												11.166	2.0326
	11.175	2.0485	2.0146																												11.175	2.0499
	11.183	2.0203	1.9769																												11.183	2.0234
	11.191	2.0212	1.9803																												11.191	1.9921
	11.2	2.063	1.9623																												11.2	2.0477
	11.208	2.0431	1.9895																												11.208	2.0195
	11.216	2.0556	2.0013																												11.216	2.0152
	11.225	2.0627	1.988																												11.225	2.0565
	11.233	2.071	1.9836																												11.233	2.0231
	11.241	2.0592	1.9694																												11.241	2.0376
	11.25	2.0512	1.9809																												11.25	2.0543
	11.258	2.0712	1.9977																												11.258	2.0189
	11.266	2.0629	1.9988																												11.266	2.0034
	11.275	2.0773	2.0038																												11.275	2.0385
	11.283	2.0391	2.0224																												11.283	2.0359
	11.291	2.0356	1.9801																												11.291	2.0403
	11.3	2.029	1.9776																												11.3	2.0366
	11.308	2.055	1.9672																												11.308	2.017
	11.316	2.0357	2.0063																												11.316	2.0311
	11.325	2.0707	2.0474																												11.325	2.0031
	11.333	2.0143	2.014																												11.333	2.0289
	11.341	2.0237	1.9752																												11.341	2.0261
	11.35	2.0667	1.9748																												11.35	2.0161
	11.358	2.0384	1.9855																												11.358	2.0036
	11.366	2.0709	1.9935																												11.366	2.0478
	11.375	2.0217	2.0089																												11.375	2.028
	11.383	2.0678	1.9913																												11.383	2.0299
	11.391	2.0328	2.0271																												11.391	2.0551
	11.4	2.058	2.0555																												11.4	2.0192
	11.408	2.0483	2.0247																												11.408	2.0013
	11.416	2.0503	1.9965																												11.416	2.0128
	11.425	2.0364	1.9745																												11.425	2.034
	11.433	2.0375	1.9841																												11.433	2.0307
	11.441	2.027	1.9892																												11.441	2.0258
	11.45	2.0606	1.9966																												11.45	2.045
	11.458	2.0286	1.9952																												11.458	2.033
	11.466	2.0795	1.9834																												11.466	2.0173
	11.475	2.043	2.0013																												11.475	2.0802
	11.483	2.0518	1.9887																												11.483	2.0313
	11.491	2.0563	1.9911																												11.491	2.0093
	11.5	2.0466	1.9906																												11.5	2.039
	11.508	2.0536	1.9877																												11.508	2.0241
	11.516	2.0637	1.9859																												11.516	2.0119
	11.525	2.0548	1.9988																												11.525	2.0207
	11.533	2.0518	1.9866																												11.533	1.9904
	11.541	2.0615	2.026																												11.541	2.028
	11.55	2.0782	1.989																												11.55	2.0442
	11.558	2.0483	1.9867																												11.558	2.0242
	11.566	2.0589	1.9895																												11.566	1.998
	11.575	2.0553	1.9667																												11.575	2.0401
	11.583	2.0548	1.9736																												11.583	1.9891
	11.591	2.0595	2.0062																												11.591	2.019
	11.6	2.0431	1.9939																												11.6	1.9973
	11.608	2.0344	2.0171																												11.608	2.0199
	11.616	2.0317	2.0039																												11.616	2.0613
	11.625	2.0535	2.0002																												11.625	1.9902
	11.633	2.0586	2.0064																												11.633	2.0155
	11.641	2.0679	2.0343																												11.641	2.0367
	11.65	2.0567	1.9831																												11.65	2.05
	11.658	2.0525	2.0118																												11.658	2.02
	11.666	2.0609	2.0407																												11.666	2.0146
	11.676	2.0529	2.0071																												11.676	2.0037
	11.683	2.0037	1.9837																												11.683	2.0201
	11.691	2.0581	1.9912																												11.691	1.9998
	11.7	2.0379	1.9688																												11.7	2.0412
	11.708	2.0386	1.9713																												11.708	2.0163
	11.716	2.0385	1.972																												11.716	2.0521
	11.725	2.0481	1.9925																												11.725	2.0281
	11.733	2.0795	2.0194																												11.733	2.0334
	11.741	1.9998	1.9854																												11.741	2.0367
	11.75	2.044	1.9914																												11.75	2.0133
	11.758	2.0496	1.9733																												11.758	1.9743
	11.766	1.9882	1.9899																												11.766	1.9669
	11.775	2.0227	2.0409																												11.775	1.9922
	11.783	2.0476	1.979																												11.783	2.0365
	11.791	2.0535	1.9766																												11.791	2.0294
	11.8	2.0558	2.0059																												11.8	2.0151
	11.808	2.0644	1.9985																												11.808	2.009
	11.816	2.036	1.9783																												11.816	2.0178
	11.825	2.0663	2.0057																												11.825	1.9873
	11.833	2.0457	2.0003																												11.833	1.9891
	11.841	2.04	1.9924																												11.841	1.9976
	11.85	2.0115	1.992																												11.85	2.001
	11.858	2.0499	2.0242																												11.858	2.0377
	11.866	2.0396	2.0083																												11.866	2.029
	11.875	2.0209	1.9753																												11.875	2.026
	11.883	2.0584	1.9995																												11.883	2.0136
	11.891	2.0279	1.9884																												11.891	2.0222
	11.9	2.0086	2.0216																												11.9	1.9972
	11.908	2.0551	2.0506																												11.908	2.0437
	11.916	2.0609	1.9934																												11.916	2.033
	11.925	2.0492	1.994																												11.925	2.0063
	11.933	2.0369	1.9868																												11.933	2.0008
	11.941	2.0369	1.9915																												11.941	2.0013
	11.949	2.075	2.0347																												11.949	2.0706
	11.958	2.031	1.973																												11.958	2.0318
	11.966	2.0575	1.9996																												11.966	2.0239
	11.975	2.0405	2.032																												11.975	2.0469
	11.983	2.0267	1.977																												11.983	1.992
	11.991	2.0472	2.0041																												11.991	2.0045
	12	2.0456	2.019																												12	2.062
	12.008	2.0468	1.9828																												12.008	2.0211
	12.016	2.0486	2.0292																												12.016	2.0189
	12.025	2.0593	2.0342																												12.025	2.0093
	12.033	2.0257	1.9783																												12.033	2.0372
	12.041	2.0605	2.0044																												12.041	2.0095
	12.05	2.0653	1.9892																												12.05	2.0182
	12.058	2.0629	1.989																												12.058	2.0437
	12.066	2.0183	2.0143																												12.066	2.0417
	12.074	2.0311	2.0005																												12.074	2.0238
	12.083	2.0028	1.9928																												12.083	2.0268
	12.091	2.074	1.9954																												12.091	1.9758
	12.099	2.0596	1.9972																												12.099	2.055
	12.108	2.0163	1.9524																												12.108	2.0408
	12.116	2.0019	1.9908																												12.116	1.9715
	12.124	2.0267	1.989																												12.124	2.0252
	12.133	2.0688	1.9874																												12.133	2.0389
	12.141	2.0571	1.9835																												12.141	2.0181
	12.149	2.0774	1.9781																												12.149	2.0171
	12.158	2.0527	1.9903																												12.158	2.0221
	12.166	2.0596	1.9865																												12.166	2.0537
	12.174	2.0374	2.0132																												12.174	2.0074
	12.183	1.9352	1.9811																												12.183	1.9971
	12.191	2.0301	1.9895																												12.191	2.0055
	12.199	2.0236	1.9936																												12.199	2.0489
	12.208	2.0633	1.9806																												12.208	1.9922
	12.216	2.0538	2.0132																												12.216	1.9968
	12.226	2.0767	2.0103																												12.226	2.0236
	12.233	2.0683	2.0317																												12.233	2.0555
	12.241	2.0554	1.9841																												12.241	2.0287
	12.249	2.0453	2.0328																												12.249	2.0104
	12.258	2.0522	1.9972																												12.258	2.0115
	12.266	2.0363	1.9966																												12.266	2.0236
	12.274	2.056	2.0312																												12.274	2.0622
	12.283	2.0251	1.9992																												12.283	2.0242
	12.291	2.0439	2.0251																												12.291	1.9971
	12.299	2.0633	1.9876																												12.299	2.016
	12.308	2.0539	1.9931																												12.308	2.0329
	12.316	2.0457	1.9913																												12.316	2.0221
	12.324	2.0409	1.9877																												12.324	1.9882
	12.333	2.0611	1.9942																												12.333	2.0171
	12.341	2.0512	1.9978																												12.341	2.0209
	12.349	2.047	1.994																												12.349	1.9899
	12.358	2.0422	2.0087																												12.358	2.0046
	12.366	2.0503	2.0247																												12.366	2.0189
	12.374	2.0157	1.9935																												12.374	2.0313
	12.383	2.0378	1.9773																												12.383	2.0091
	12.391	2.0763	2.0283																												12.391	2.0126
	12.399	2.0333	2.0078																												12.399	1.9938
	12.408	2.0286	1.9471																												12.408	1.9859
	12.416	2.0271	2.0082																												12.416	2.0489
	12.424	2.0251	1.9993																												12.424	2.0076
	12.433	2.0623	2.0088																												12.433	2.0245
	12.441	2.0494	1.9901																												12.441	1.9941
	12.449	2.0567	2.0052																												12.449	2.0186
	12.458	2.0488	1.994																												12.458	2.0365
	12.466	2.0553	2.0004																												12.466	1.9925
	12.474	2.0548	1.9936																												12.474	2.0352
	12.483	2.0555	1.9811																												12.483	2.0102
	12.491	2.0573	2.0036																												12.491	2.0086
	12.499	2.0531	2.0482																												12.499	2.013
	12.508	2.0513	1.994																												12.508	2.0361
	12.516	2.0294	1.9908																												12.516	2.0296
	12.524	2.0253	2.0086																												12.524	2.0202
	12.533	2.0364	1.9984																												12.533	2.0175
	12.541	2.0066	2.0051																												12.541	1.9955
	12.549	2.0585	1.9758																												12.549	2.0204
	12.558	2.0654	1.9859																												12.558	2.0393
	12.566	2.0461	1.9677																												12.566	2.0362
	12.574	2.0312	1.9993																												12.574	1.9845
	12.583	2.0551	1.9759																												12.583	1.9823
	12.591	2.0705	1.9878																												12.591	2.011
	12.599	2.0302	2.01																												12.599	2.0162
	12.608	2.0298	1.9905																												12.608	1.9963
	12.616	2.0207	2.0019																												12.616	2.0021
	12.624	2.0473	1.9886																												12.624	2.0549
	12.633	2.0615	1.994																												12.633	2.0211
	12.641	2.0556	1.9985																												12.641	2.0286
	12.649	2.0726	1.9732																												12.649	2.0198
	12.658	2.0633	2.045																												12.658	2.0536
	12.667	2.0587	1.9824																												12.667	2.0054
	12.674	2.0645	1.9781																												12.674	2.0236
	12.683	2.0348	2.0257																												12.683	2.0072
	12.691	2.0225	2.0027																												12.691	2.0514
	12.699	2.0489	1.9913																												12.699	2.0308
	12.708	2.0665	2.0006																												12.708	2.0357
	12.716	2.0603	1.9988																												12.716	2.0253
	12.724	2.0699	1.9844																												12.724	2.0318
	12.733	2.077	1.9958																												12.733	2.024
	12.741	2.0722	2.0176																												12.741	2.0267
	12.749	2.0377	1.9962																												12.749	2.0521
	12.758	2.0566	1.9872																												12.758	2.0251
	12.766	2.0512	1.977																												12.766	2.0452
	12.776	2.0513	2.0104																												12.776	2.0067
	12.783	2.0616	2.0266																												12.783	2.0218
	12.791	2.0441	2.002																												12.791	2.0036
	12.799	2.0346	2.0161																												12.799	2.0203
	12.807	2.0654	1.994																												12.807	2.0083
	12.816	2.0292	1.9924																												12.816	2.0105
	12.824	2.0409	2.0098																												12.824	2.0209
	12.833	2.0627	2.0077																												12.833	2.0313
	12.841	2.0615	2.0198																												12.841	2.0226
	12.849	2.0605	2.0096																												12.849	1.9953
	12.858	2.0615	1.9827																												12.858	2.0333
	12.866	2.0381	1.9995																												12.866	2.0075
	12.874	2.069	2.0008																												12.874	2.0419
	12.883	2.067	2.0105																												12.883	2.0381
	12.891	2.0534	1.9925																												12.891	1.9919
	12.899	2.0567	2.0007																												12.899	2.0098
	12.908	2.044	1.997																												12.908	2.0454
	12.916	2.0603	1.9841																												12.916	2.002
	12.924	2.0201	1.9981																												12.924	1.9658
	12.933	2.0671	1.9771																												12.933	2.0046
	12.941	2.0129	1.9851																												12.941	2.0227
	12.949	2.0543	1.9606																												12.949	1.9907
	12.958	2.0618	2.0073																												12.958	2.0232
	12.966	2.0639	1.9926																												12.966	2.0345
	12.974	2.0503	1.9998																												12.974	1.9946
	12.983	2.0369	2.0036																												12.983	2.0039
	12.991	2.0436	1.9849																												12.991	2.0339
	12.999	2.0225	1.9873																												12.999	2.0556
	13.007	2.0272	1.9812																												13.007	2.0369
	13.016	2.0676	1.9949																												13.016	2.0173
	13.024	2.0599	1.9934																												13.024	1.9898
	13.032	2.0718	1.9994																												13.032	2.0428
	13.041	2.0903	1.9969																												13.041	2.0004
	13.049	2.0627	1.9877																												13.049	1.9958
	13.057	2.0451	1.9505																												13.057	2.039
	13.066	2.0331	2.0053																												13.066	2.0154
	13.074	2.0367	2.0183																												13.074	2.0457
	13.083	2.036	2.0009																												13.083	2.0119
	13.091	2.0609	2.0293																												13.091	2.0218
	13.099	2.0628	1.9861																												13.099	2.0044
	13.107	2.0419	1.9801																												13.107	1.9863
	13.116	2.0564	1.9599																												13.116	2.0038
	13.124	2.0655	1.9693																												13.124	1.9987
	13.132	2.0459	2.018																												13.132	1.9849
	13.141	2.0305	2.0058																												13.141	2.0247
	13.149	2.0717	1.9961																												13.149	2.0189
	13.157	2.0471	1.9876																												13.157	2.0055
	13.166	2.0792	2.0042																												13.166	2.0176
	13.174	2.0621	1.9698																												13.174	2.0336
	13.182	2.0654	2.0083																												13.182	1.9997
	13.191	2.0359	1.9937																												13.191	1.9865
	13.199	2.0638	1.9658																												13.199	2.0049
	13.207	2.033	2.035																												13.207	2.0127
	13.216	2.0599	1.9772																												13.216	2.0186
	13.224	2.0373	1.9918																												13.224	2.0353
	13.232	1.9951	1.9871																												13.232	2.002
	13.241	2.0642	2.0205																												13.241	2.0337
	13.249	2.0432	2.0208																												13.249	1.9969
	13.258	1.9995	1.9964																												13.258	2.001
	13.266	2.058	1.99																												13.266	2.0366
	13.274	2.0644	2.0166																												13.274	2.022
	13.283	2.0639	1.9769																												13.283	1.9837
	13.291	2.0699	1.9929																												13.291	2.0204
	13.299	2.0573	2.0084																												13.299	2.0289
	13.307	2.0501	1.9653																												13.307	1.9884
	13.316	2.0434	1.9833																												13.316	2.0314
	13.326	2.082	1.975																												13.326	2.0501
	13.332	2.0446	1.9856																												13.332	2.0265
	13.341	2.0262	1.9796																												13.341	2.0003
	13.349	2.0307	1.994																												13.349	2.0542
	13.357	2.002	1.9832																												13.357	2.0223
	13.366	2.0418	2.0095																												13.366	2.0028
	13.374	2.0517	1.9866																												13.374	2.0493
	13.382	2.0628	1.9652																												13.382	2.0165
	13.391	2.0743	1.9824																												13.391	2.0283
	13.399	2.0327	2.033																												13.399	2.0139
	13.407	2.0178	1.9774																												13.407	2.0045
	13.416	2.0378	1.9904																												13.416	2.034
	13.424	2.04	1.9961																												13.424	2.0594
	13.432	2.0504	1.9981																												13.432	1.9899
	13.441	2.0284	2.0053																												13.441	2.0281
	13.449	2.0588	1.96																												13.449	2.0207
	13.457	2.0632	1.9906																												13.457	1.9883
	13.466	2.0645	1.9942																												13.466	2.0051
	13.474	2.0789	2.0059																												13.474	2.0054
	13.482	2.0175	1.9958																												13.482	2.0408
	13.491	2.0666	2.0171																												13.491	2.0214
	13.499	2.0676	1.9927																												13.499	2.0212
	13.508	2.0699	2.024																												13.508	2.0113
	13.516	2.0616	1.9942																												13.516	2.0248
	13.524	2.0546	1.9994																												13.524	2.036
	13.532	2.0712	2.009																												13.532	2.0404
	13.541	2.0467	2.0026																												13.541	1.9933
	13.549	2.0744	2.0005																												13.549	2.011
	13.557	2.0341	1.9963																												13.557	1.9982
	13.566	2.0626	1.9862																												13.566	2.0173
	13.574	2.0594	1.9983																												13.574	2.0202
	13.582	2.0603	1.9758																												13.582	2.0375
	13.591	2.0351	1.9812																												13.591	1.9809
	13.599	2.0688	2.0143																												13.599	2.02
	13.607	2.0334	1.9681																												13.607	2.0309
	13.616	2.0474	2.0163																												13.616	2.0188
	13.624	2.0678	1.9955																												13.624	2.0181
	13.632	2.0759	2.0003																												13.632	2.0578
	13.641	2.044	1.9884																												13.641	1.9969
	13.649	2.0607	1.9998																												13.649	1.9896
	13.657	2.0768	1.9785																												13.657	2.0093
	13.666	2.0149	1.9784																												13.666	2.0109
	13.674	2.0727	1.9851																												13.674	2.0184
	13.682	2.0759	1.9836																												13.682	2.0101
	13.691	2.0401	2.0014																												13.691	1.9886
	13.699	2.0721	1.9749																												13.699	2.0563
	13.707	2.0557	2.0028																												13.707	1.9912
	13.716	2.0363	2.0251																												13.716	2.0073
	13.724	2.0746	1.9799																												13.724	2.0004
	13.732	2.0701	2.0116																												13.732	1.9996
	13.741	2.0696	1.9774																												13.741	2.019
	13.749	2.0793	2.0124																												13.749	2.0205
	13.757	2.0618	1.9861																												13.757	2.0221
	13.766	2.0703	2.0129																												13.766	2.021
	13.774	2.0742	1.9965																												13.774	1.9878
	13.782	2.0131	2.0058																												13.782	2.0324
	13.791	2.0678	1.9807																												13.791	1.9958
	13.799	2.0688	2.0012																												13.799	1.995
	13.807	2.0608	1.9999																												13.807	2.0226
	13.816	2.0621	2.0224																												13.816	2.0305
	13.824	2.0313	1.9914																												13.824	1.9921
	13.832	2.0547	1.9941																												13.832	2.0414
	13.841	2.0137	1.9957																												13.841	2.0167
	13.849	2.0648	1.9616																												13.849	2.0192
	13.857	2.0748	1.9896																												13.857	2.0088
	13.866	2.0866	2.0089																												13.866	2.0439
	13.877	2.0537	1.998																												13.877	2.0259
	13.882	2.0328	1.9891																												13.882	2.0201
	13.891	2.0734	1.9777																												13.891	2.0074
	13.899	2.0631	1.9546																												13.899	1.9995
	13.907	2.0621	2.0547																												13.907	2.0306
	13.916	2.0552	2.0504																												13.916	1.9801
	13.924	2.0661	1.9897																												13.924	2.0023
	13.932	2.0589	2.0004																												13.932	2.0084
	13.941	2.0574	2.0111																												13.941	2.0086
	13.949	2.0544	2.0046																												13.949	2.0346
	13.957	2.0634	2.0085																												13.957	2.0212
	13.966	2.0636	1.9847																												13.966	1.9951
	13.974	2.0592	1.9792																												13.974	2.0233
	13.982	2.0671	1.9992																												13.982	2.027
	13.991	2.0765	1.9936																												13.991	2.0418
	13.999	2.0659	2.0085																												13.999	2.0518
	14.007	2.0634	1.9969																												14.007	1.9913
	14.016	2.0725	1.9913																												14.016	1.9995
	14.024	2.0733	1.9804																												14.024	2.0244
	14.032	2.0229	1.9917																												14.032	2.0222
	14.04	2.046	1.9742																												14.04	2.0225
	14.049	2.0657	2.0001																												14.049	2.0026
	14.057	2.0496	1.9903																												14.057	1.9848
	14.066	2.049	2.0034																												14.066	1.972
	14.074	2.0646	2.0138																												14.074	2.0117
	14.082	2.0562	2.0113																												14.082	2.0518
	14.091	2.0608	2.0398																												14.091	2.0126
	14.099	2.0268	1.9976																												14.099	2.0151
	14.107	2.0665	2.0143																												14.107	2.0189
	14.116	2.0784	2.0384																												14.116	2.0267
	14.124	2.0242	2.0106																												14.124	2.01
	14.132	2.0112	1.9952																												14.132	2.0202
	14.141	2.0358	1.9891																												14.141	2.034
	14.149	2.0485	1.9961																												14.149	2.0235
	14.157	2.0564	2.0045																												14.157	2.0246
	14.166	2.0685	1.9972																												14.166	1.9842
	14.174	2.0616	1.9958																												14.174	2.0251
	14.182	2.0609	2.0075																												14.182	2.0165
	14.19	2.0552	2.0032																												14.19	1.9926
	14.199	2.0653	2.0029																												14.199	2.0128
	14.207	2.0572	2.0128																												14.207	1.9967
	14.215	2.0562	1.9693																												14.215	2.0205
	14.224	2.0558	2.0094																												14.224	2.0534
	14.232	2.0586	2.0001																												14.232	2.0509
	14.24	2.0602	2.0033																												14.24	1.9899
	14.249	2.0618	1.9913																												14.249	2.0301
	14.257	2.0625	2.0078																												14.257	2.0142
	14.265	2.0563	1.9768																												14.265	1.9986
	14.274	2.0214	1.9972																												14.274	2.0157
	14.282	2.0457	1.9833																												14.282	1.9891
	14.29	2.0284	2.0098																												14.29	2.003
	14.299	2.044	1.9833																												14.299	2.0147
	14.307	2.0431	1.9921																												14.307	1.9971
	14.316	2.0892	1.9859																												14.316	2.044
	14.324	2.0448	2.0186																												14.324	2.0261
	14.332	2.0466	2.0312																												14.332	2.0419
	14.34	2.0456	1.9819																												14.34	2.042
	14.349	2.0363	1.9866																												14.349	2.0289
	14.357	2.0675	1.9825																												14.357	1.9965
	14.365	2.0718	1.9775																												14.365	2.0199
	14.374	2.0526	2.0068																												14.374	2.0043
	14.382	2.0189	1.9917																												14.382	2.0764
	14.39	2.072	2.001																												14.39	2.0493
	14.399	2.0669	2.0072																												14.399	2.014
	14.407	2.0637	2.0033																												14.407	1.992
	14.415	2.0654	1.9993																												14.415	2.0134
	14.427	2.0483	2.0051																												14.427	2.0065
	14.432	2.0581	1.9955																												14.432	2.0069
	14.441	2.072	1.9908																												14.441	1.9939
	14.449	2.0444	1.9725																												14.449	1.9511
	14.457	2.0432	2.0063																												14.457	1.9902
	14.465	2.0403	1.9782																												14.465	2.0134
	14.474	2.0723	1.9903																												14.474	2.0051
	14.482	2.0726	1.9773																												14.482	2.0262
	14.49	2.0558	2.0111																												14.49	2.0319
	14.499	2.0304	1.9866																												14.499	1.9963
	14.507	2.0153	1.9942																												14.507	2.0078
	14.515	2.0478	2.0225																												14.515	1.9706
	14.524	2.0638	1.9933																												14.524	2.0112
	14.532	2.0525	2.0016																												14.532	2.0538
	14.54	2.0775	1.9776																												14.54	2.0022
	14.549	2.0455	1.9568																												14.549	2.0188
	14.557	2.0713	1.9976																												14.557	2.0151
	14.565	2.071	1.9851																												14.565	2.0125
	14.574	2.059	1.8123																												14.574	2.0156
	14.582	2.0739	1.9312																												14.582	2.0314
	14.59	2.032	1.9826																												14.59	2.0263
	14.599	2.0515	2.0453																												14.599	2.0103
	14.607	2.0727	1.9912																												14.607	1.958
	14.615	2.0263	2.0059																												14.615	1.9704
	14.624	2.0567	1.9975																												14.624	2.0296
	14.632	2.0549	1.9958																												14.632	2.0101
	14.64	2.0686	1.985																												14.64	2.0391
	14.649	2.0713	1.9861																												14.649	2.0301
	14.657	2.0403	1.9769																												14.657	2.0225
	14.665	2.0511	2.0042																												14.665	1.9963
	14.674	2.0684	2.0507																												14.674	1.9561
	14.682	2.0471	2.0344																												14.682	1.9996
	14.69	2.077	2.0424																												14.69	2.0262
	14.699	2.0488	1.9773																												14.699	2.0246
	14.707	2.0721	1.9894																												14.707	1.9789
	14.715	2.0554	1.9753																												14.715	2.0279
	14.724	2.0651	2.0435																												14.724	2.0218
	14.732	2.0545	2.0072																												14.732	2.0195
	14.74	2.0767	1.9693																												14.74	2.0441
	14.749	2.0524	1.9875																												14.749	2.022
	14.757	2.0603	1.9943																												14.757	2.013
	14.765	2.0592	2.0058																												14.765	2.0062
	14.774	2.056	1.9873																												14.774	2.0329
	14.782	2.0565	1.9901																												14.782	1.9905
	14.79	2.032	1.9853																												14.79	2.0043
	14.799	2.0562	1.9649																												14.799	2.0333
	14.807	2.0365	1.9684																												14.807	2.0144
	14.815	2.0627	1.9821																												14.815	1.9767
	14.824	2.0596	2.0196																												14.824	1.9799
	14.832	2.047	2.0529																												14.832	2.0091
	14.84	2.0729	2.0155																												14.84	2.0452
	14.849	2.0515	2.0126																												14.849	2.0089
	14.857	2.0467	1.9853																												14.857	2.026
	14.866	2.0451	2.0168																												14.866	2.0156
	14.874	2.0593	2.016																												14.874	2.053
	14.882	2.0738	2.0401																												14.882	2.0363
	14.89	2.0665	1.9863																												14.89	2.016
	14.899	2.0534	1.9905																												14.899	2.034
	14.907	2.0293	1.9691																												14.907	2.0154
	14.915	2.0664	2.0181																												14.915	2.0265
	14.924	2.0682	2.015																												14.924	1.9887
	14.932	2.0191	1.978																												14.932	2.0004
	14.94	2.044	1.9562																												14.94	2.0331
	14.949	2.0708	1.9878																												14.949	2.0141
	14.957	2.0574	1.9862																												14.957	1.9837
	14.965	2.0472	1.998																												14.965	2.0129
	14.976	2.0695	1.9851																												14.976	2.0001
	14.982	2.061	1.9755																												14.982	1.9892
	14.99	2.0714	1.99																												14.99	1.9994
	14.999	2.0511	1.9947																												14.999	2.01
	15.007	2.0316	1.9983																												15.007	2.0178
	15.015	2.0352	1.9894																												15.015	2.0056
	15.024	2.0378	1.985																												15.024	2.0255
	15.032	2.0313	1.9885																												15.032	2.039
	15.04	2.0615	1.9796																												15.04	2.0277
	15.049	2.0768	1.9885																												15.049	2.0271
	15.057	2.0576	2.0228																												15.057	1.9962
	15.065	2.0644	2.0038																												15.065	1.9827
	15.074	2.074	2.0044																												15.074	2.0153
	15.082	2.056	1.9844																												15.082	2.0237
	15.09	2.0616	1.9899																												15.09	2.0219
	15.098	2.0405	1.9748																												15.098	1.9934
	15.107	2.0489	1.9575																												15.107	1.9975
	15.115	2.073	2.002																												15.115	2.044
	15.124	2.0783	1.9924																												15.124	2.0004
	15.132	2.0622	1.996																												15.132	1.9768
	15.14	2.0531	2.0161																												15.14	2.0087
	15.149	2.0386	2.0024																												15.149	2.0172
	15.157	2.0413	1.9975																												15.157	2.0151
	15.165	2.0527	1.9745																												15.165	2.0262
	15.174	2.0507	2.0103																												15.174	2.0204
	15.182	2.0557	1.9848																												15.182	2.0113
	15.19	2.0303	1.9813																												15.19	2.0304
	15.199	2.0086	1.9668																												15.199	2.0277
	15.207	2.0413	1.965																												15.207	2.0385
	15.215	2.0597	1.9816																												15.215	2.0484
	15.223	2.0619	1.9907																												15.223	2.0036
	15.232	2.0549	1.9845																												15.232	2.0177
	15.24	2.0686	1.9918																												15.24	1.9983
	15.248	2.0356	2.0136																												15.248	1.9757
	15.257	2.0531	1.9907																												15.257	2.0026
	15.265	2.0825	1.9929																												15.265	2.0116
	15.274	2.063	2.0157																												15.274	2.0102
	15.282	2.0559	1.9988																												15.282	2.0211
	15.29	2.058	1.996																												15.29	2.0045
	15.299	2.0691	2.0044																												15.299	2.0243
	15.307	2.0625	2.0037																												15.307	2.0225
	15.315	2.0641	2.0281																												15.315	1.9827
	15.323	2.0702	2.017																												15.323	1.9908
	15.332	2.0576	2.0044																												15.332	2.0027
	15.34	2.0589	2.0049																												15.34	1.9984
	15.348	2.0298	2.0312																												15.348	2.0106
	15.357	2.032	1.9888																												15.357	2.031
	15.365	2.0617	1.9513																												15.365	2.0162
	15.373	2.0661	1.985																												15.373	1.9677
	15.382	2.0679	1.9979																												15.382	2.0619
	15.39	2.0773	1.9975																												15.39	2.068
	15.398	2.0559	2.0122																												15.398	2.0184
	15.407	2.0515	1.9738																												15.407	2.0127
	15.416	2.0581	1.9755																												15.416	1.9974
	15.423	2.0455	1.9906																												15.423	2.0343
	15.432	2.0702	1.9901																												15.432	2.0288
	15.44	2.0647	1.9784																												15.44	2.0018
	15.448	2.0276	1.9729																												15.448	1.9658
	15.457	2.079	1.9793																												15.457	2.0527
	15.465	2.0373	1.974																												15.465	2.0128
	15.473	2.0652	2.0087																												15.473	2.0156
	15.482	2.0799	1.9943																												15.482	1.9912
	15.49	2.0619	2.0062																												15.49	1.9983
	15.498	2.0607	1.9839																												15.498	2.0074
	15.507	2.0598	1.9973																												15.507	2.0159
	15.515	2.0599	1.9911																												15.515	2.0238
	15.523	2.087	1.9971																												15.523	2.015
	15.532	2.0733	1.9922																												15.532	1.9736
	15.54	2.0634	2.0488																												15.54	1.9808
	15.548	2.0592	1.9846																												15.548	2.0216
	15.557	2.0615	2.0128																												15.557	2.0276
	15.565	2.0541	1.9897																												15.565	2.0158
	15.573	2.0559	1.9887																												15.573	2.013
	15.582	2.0618	1.9955																												15.582	2.0149
	15.59	2.0673	2.002																												15.59	2.0132
	15.598	2.0655	1.9884																												15.598	1.9836
	15.607	2.0524	2.0109																												15.607	2.0087
	15.615	2.0592	2.0055																												15.615	2.0073
	15.623	2.0535	1.9979																												15.623	1.9673
	15.632	2.0753	1.9923																												15.632	2.0406
	15.64	2.0677	2.0236																												15.64	2.0457
	15.648	2.0257	1.9969																												15.648	2.0447
	15.657	2.0827	2.0096																												15.657	2.0234
	15.665	2.063	2.0075																												15.665	2.0276
	15.673	2.0618	2.0113																												15.673	1.9923
	15.682	2.072	1.9988																												15.682	1.987
	15.69	2.0118	1.9939																												15.69	2.0403
	15.698	2.0516	2.0213																												15.698	2.0111
	15.707	2.0484	1.9942																												15.707	2.0391
	15.715	2.0452	1.997																												15.715	2.0249
	15.723	2.0544	1.9828																												15.723	1.9917
	15.732	2.0622	1.977																												15.732	2.0101
	15.74	2.0568	2.0073																												15.74	2.049
	15.748	2.0693	2.0195																												15.748	1.9964
	15.757	2.0654	2.0089																												15.757	1.9778
	15.765	2.0528	2.0259																												15.765	1.9983
	15.773	2.063	1.9804																												15.773	2.0543
	15.782	2.0667	2.0062																												15.782	2.0241
	15.79	2.082	1.9725																												15.79	1.9861
	15.798	2.067	1.9968																												15.798	2.0181
	15.807	2.04	2																												15.807	2.0246
	15.815	2.0569	2.003																												15.815	1.9484
	15.823	2.0589	1.9605																												15.823	2.0049
	15.832	2.0392	1.9638																												15.832	2.0245
	15.84	2.0664	2.0074																												15.84	2.0326
	15.848	2.0599	2.0072																												15.848	2.0319
	15.857	2.0227	1.98																												15.857	2.0232
	15.865	2.0163	1.9658																												15.865	2.0017
	15.873	2.0849	1.9794																												15.873	2.0336
	15.882	2.0613	1.998																												15.882	2.0114
	15.89	2.0575	2.0043																												15.89	1.9672
	15.898	2.0495	1.9949																												15.898	1.994
	15.907	2.0481	1.9993																												15.907	2.0252
	15.915	2.0548	2.0019																												15.915	2.0232
	15.923	2.0566	2.0013																												15.923	1.9747
	15.932	2.0551	1.9959																												15.932	1.9889
	15.94	2.0738	2.0065																												15.94	1.9647
	15.948	2.0687	1.9994																												15.948	2.0064
	15.957	2.0311	2.0236																												15.957	2.011
	15.966	2.0531	1.9657																												15.966	2.025
	15.973	2.0696	1.9814																												15.973	2.0384
	15.982	2.0558	1.9984																												15.982	2.0264
	15.99	2.0615	2.0142																												15.99	1.9845
	15.998	2.0559	1.9864																												15.998	2.0162
	16.007	2.0808	2																												16.007	2.0126
	16.015	2.0739	2.0043																												16.015	2.0114
	16.023	2.0593	1.9928																												16.023	2.0095
	16.032	2.0747	1.9974																												16.032	2.0066
	16.04	2.0569	2.0001																												16.04	2.0382
	16.048	2.0425	1.9919																												16.048	2.0117
	16.057	2.0428	2.0133																												16.057	1.9863
	16.065	2.0624	1.9878																												16.065	2.0024
	16.073	2.0182	1.9888																												16.073	2.0016
	16.082	2.0619	1.9881																												16.082	2.0474
	16.09	2.0429	2.0072																												16.09	2.0275
	16.098	2.0517	1.9766																												16.098	2.0214
	16.107	2.0743	1.9794																												16.107	2.0093
	16.115	2.0633	2.0067																												16.115	2.0222
	16.123	2.0715	1.9977																												16.123	2.0371
	16.132	2.037	1.9654																												16.132	1.9939
	16.14	2.056	1.9643																												16.14	2.0023
	16.148	2.0504	1.9793																												16.148	2.0488
	16.157	2.0835	1.9772																												16.157	2.0129
	16.165	2.0735	1.9983																												16.165	2.0192
	16.173	2.0391	1.9891																												16.173	2.0521
	16.182	2.0671	2.0018																												16.182	1.9996
	16.19	2.05	2.0179																												16.19	1.967
	16.198	2.0436	1.9938																												16.198	2.0179
	16.207	2.0559	1.9892																												16.207	2.0073
	16.215	2.0596	1.9942																												16.215	2.0233
	16.223	2.0618	1.9968																												16.223	2.0494
	16.232	2.0648	1.9813																												16.232	2.0161
	16.24	2.0539	1.9969																												16.24	2.0149
	16.248	2.0834	1.9913																												16.248	1.9823
	16.257	2.0604	1.9665																												16.257	2.0265
	16.265	2.0657	1.9745																												16.265	2.0245
	16.273	2.0402	2.0069																												16.273	2.008
	16.282	2.0891	1.9966																												16.282	2.0342
	16.29	2.0859	1.994																												16.29	1.9816
	16.298	2.0529	2.0039																												16.298	2.0279
	16.307	2.0417	1.9941																												16.307	2.0639
	16.315	2.0296	2.0067																												16.315	2.0289
	16.323	2.0285	1.9827																												16.323	2.0188
	16.332	2.0586	2.0267																												16.332	2.0222
	16.34	2.0541	1.9712																												16.34	2.0336
	16.348	2.0815	1.9956																												16.348	2.016
	16.357	2.0749	2.0429																												16.357	2.0352
	16.365	2.0667	2.0241																												16.365	2.0346
	16.373	2.0297	2.0044																												16.373	2.0338
	16.382	2.0383	1.9837																												16.382	2.006
	16.39	2.0512	1.9789																												16.39	2.0621
	16.398	2.0354	1.994																												16.398	2.0199
	16.406	2.0401	1.9821																												16.406	2.0037
	16.415	2.0451	1.9666																												16.415	2.0073
	16.423	2.048	1.9789																												16.423	2.0378
	16.432	2.0686	1.9661																												16.432	2.0099
	16.44	2.0259	1.9815																												16.44	1.9909
	16.448	2.0564	1.9997																												16.448	2.0108
	16.457	2.0348	1.9913																												16.457	2.0103
	16.465	2.0678	2.0113																												16.465	2.0227
	16.473	2.0523	1.9816																												16.473	2.0109
	16.481	2.0398	1.9977																												16.481	1.9811
	16.49	2.0164	2.0011																												16.49	1.9974
	16.498	2.0518	1.9804																												16.498	2.0095
	16.506	2.0531	1.9767																												16.506	1.9953
	16.516	2.0612	1.9885																												16.516	2.0286
	16.523	2.0407	1.9838																												16.523	2.0349
	16.531	2.0711	1.9701																												16.531	1.9934
	16.54	2.0612	1.9998																												16.54	2.0481
	16.548	2.0305	2.0028																												16.548	1.9943
	16.556	2.039	2.007																												16.556	2.0156
	16.565	2.0421	1.9951																												16.565	1.9999
	16.573	2.0692	1.983																												16.573	2.0251
	16.581	2.0712	1.9928																												16.581	1.9962
	16.59	2.075	2.0067																												16.59	1.9741
	16.598	2.0683	1.9967																												16.598	2.0094
	16.606	2.0917	2.0099																												16.606	2.0057
	16.615	2.0644	1.9996																												16.615	2.0211
	16.623	2.041	2.0002																												16.623	1.9859
	16.631	2.0716	2.0055																												16.631	2.0034
	16.64	2.0362	1.9974																												16.64	2.0054
[truncated: 20,535 more rows]
