# Supplementary material for: CTP promotes efficient ParB-dependent DNA condensation by facilitating one-dimensional diffusion from parS
Source: eLife. 2021 Jul 12;10:e67554. doi: 10.7554/eLife.67554 (PMC8299390; doi:10.7554/eLife.67554)
Supplement: Figure 5—source data 1. [file elife-67554-fig5-data1.xlsx]

## Sheet: Figure5
Figure 5A	13xparS	2 mM CTPgS	4 mM MgCl2								Figure 5B	13xparS	2 mM CTPgS	4 mM MgCl2
		No ParB		10 nM		50 nM		200 nM						no ParB	200 nM ParB2
	Force	Extension	SEM	Extension	SEM	Extension	SEM	Extension	SEM			Time (s)	Force (pN)	Extension (um)	Extension (um)
	4.96913	2.26383	0.01721	2.30499	0.02844	2.25595	0.01133	2.30546	0.04222			0.089	4.07541	2.0255	2.0134
	4.64421	2.2489	0.01594	2.3001	0.02858	2.251	0.01243	2.30266	0.04199			0.096	4.07541	2.0165	2.0319
	4.34053	2.24357	0.01603	2.29032	0.02901	2.24367	0.01162	2.29671	0.04513			0.11	4.07541	2.018	1.9884
	3.79146	2.2258	0.01653	2.26965	0.02918	2.23265	0.00986	2.27666	0.04503			0.113	4.07541	1.9863	1.9995
	3.31184	2.20623	0.01703	2.25089	0.02844	2.21277	0.01144	2.25353	0.04422			0.134	4.07541	2.0121	2.0127
	2.52694	2.17037	0.0198	2.20364	0.02935	2.16418	0.01483	2.20619	0.04338			0.135	4.07541	2.0008	1.9885
	1.68416	2.1223	0.02618	2.14645	0.03007	2.11615	0.019	2.1554	0.05113			0.137	4.07486	2.0273	2.0015
	1.28502	2.04483	0.0345	2.03095	0.04619	1.99753	0.0522	2.0426	0.08027			0.146	4.07486	2.0572	2.0166
	1.12247	2.01183	0.04038	1.97703	0.05798	1.92075	0.09074	1.99233	0.08927			0.154	4.07486	2.0035	2.0185
	0.65347	1.8703	0.06524	1.57478	0.2232	1.40763	0.213	1.32203	0.25876			0.163	4.07486	2.0168	2.001
	0.43553	1.7435	0.08115	0.85909	0.21967	0.39532	0.07447	0.24257	0.04599			0.171	4.07486	2.0441	2.0032
	0.33231	1.64413	0.08407	0.53534	0.19709	0.27679	0.07487	0.17806	0.03737			0.179	4.07376	2.0368	1.9981
	0.16899	1.30767	0.09381	0.3223	0.16839	0.26664	0.06882	0.14055	0.02682			0.187	4.07321	2.0373	1.9937
	0.11263	1.07103	0.08211	0.2423	0.12577	0.25671	0.06459	0.12357	0.0222			0.196	4.07101	2.0187	2.0125
	0.08593	0.91222	0.07537	0.19608	0.10792	0.25611	0.06358	0.11819	0.02354			0.204	4.07045	2.0679	2.0025
	0.0437	0.53361	0.03913	0.1648	0.08718	0.24809	0.05589	0.11283	0.02322			0.214	4.0699	2.0522	2.0005
	0.02222	0.36236	0.06025	0.14613	0.0726	0.23734	0.05229	0.11141	0.02402			0.221	4.0699	2.0402	2.0104
	0.0113	0.28618	0.05926	0.12761	0.06133	0.24124	0.05071	0.12105	0.02244			0.229	4.06825	2.027	1.9779
	0.00292	0.21677	0.06771	0.12415	0.06339	0.24823	0.04882	0.13556	0.02309			0.237	4.0677	2.0132	1.9732
	0.00149	0.21813	0.06678	0.1057	0.05017	0.24368	0.04957	0.13774	0.02308			0.247	4.0677	2.018	1.9832
	0.000755745	0.24779	0.03068	0.12451	0.04965	0.25413	0.05153	0.15261	0.0234			0.254	4.06715	2.0325	1.9851
	--	--	--									0.263	4.06715	2.0564	2.0006
	--	--	--									0.271	4.06715	1.9997	1.9842
												0.279	4.0666	2.0309	1.9916
												0.287	4.0666	2.03	1.9868
												0.297	4.0655	2.0207	2.0008
												0.304	4.06495	2.0129	1.9832
												0.312	4.0644	2.0059	2.0248
												0.322	4.0644	2.0232	2.0171
												0.329	4.06385	2.0492	2.018
												0.337	4.06275	2.0696	1.9931
												0.347	4.06275	2.0251	1.9773
												0.354	4.06221	2.0355	2.0068
												0.362	4.06221	2.0456	2.0009
												0.371	4.06221	2.0617	2.0087
												0.38	4.06166	2.0297	2.0088
												0.387	4.06166	1.9915	2.0128
												0.397	4.06166	2.0436	2.0085
												0.404	4.06056	2.0467	1.9835
												0.412	4.06056	2.0195	2.0132
												0.422	4.06001	2.0132	2.0168
												0.429	4.06001	2.004	2.0258
												0.438	4.06001	2.0233	2.0092
												0.446	4.05946	2.0168	1.9821
												0.455	4.05946	2.0104	2.0224
												0.464	4.05946	2.034	1.9938
												0.471	4.05946	2.0572	2.0061
												0.48	4.05946	2.0367	2.0029
												0.487	4.05891	2.0247	2.015
												0.496	4.05891	1.9995	2.0246
												0.504	4.05891	2.052	1.9877
												0.515	4.05891	2.0004	1.9792
												0.521	4.05891	2.0101	1.9999
												0.529	4.05781	2.0124	2.0364
												0.537	4.05781	1.9882	2.0212
												0.546	4.05781	2.0448	2.0013
												0.554	4.05781	2.0266	2.0204
												0.562	4.05781	2.0015	1.9812
												0.571	4.05781	1.9919	1.9708
												0.579	4.05781	2.0184	1.9814
												0.587	4.05781	2.0152	1.9802
												0.597	4.05781	1.9997	1.9938
												0.604	4.05781	2.0277	2.0037
												0.612	4.05781	2.0318	2.0105
												0.621	4.05726	2.0209	1.9905
												0.63	4.05726	2.0327	2.0169
												0.637	4.05726	2.0204	1.9696
												0.646	4.05726	2.0178	1.9802
												0.655	4.05726	2.0268	1.9958
												0.662	4.05726	2.0458	2.005
												0.671	4.05726	2.0449	1.9996
												0.68	4.05672	2.0276	2.0057
												0.687	4.05672	2.0264	1.9809
												0.696	4.05672	2.0486	2.0144
												0.705	4.05672	2.0431	1.9954
												0.712	4.05672	1.9936	1.9808
												0.721	4.05672	2.0303	2.007
												0.73	4.05672	2.0086	1.9384
												0.737	4.05672	2.083	1.9776
												0.747	4.05672	2.0274	1.9888
												0.754	4.05672	2.0344	2.0094
												0.762	4.05672	1.9905	1.9652
												0.772	4.05672	2.0201	1.9908
												0.779	4.05672	2.0335	2.0047
												0.789	4.05672	2.03	1.9866
												0.796	4.05672	2.0436	1.9866
												0.804	4.05672	2.036	2.0125
												0.812	4.05672	2.0584	2.0057
												0.821	4.05672	2.0664	2.0173
												0.829	4.05672	2.0394	2.0179
												0.838	4.05672	2.0239	2.0051
												0.846	4.05672	2.05	2.0027
												0.855	4.05672	2.0095	2.0074
												0.862	4.05672	2.0519	2.0134
												0.871	4.05672	2.0554	1.9886
												0.88	4.05672	2.0486	1.9978
												0.887	4.05672	2.0371	1.9777
												0.897	4.05672	2.0152	2.0209
												0.904	4.05672	2.0308	2.0155
												0.913	4.05672	2.0361	2.0091
												0.921	4.05672	2.0378	2.001
												0.929	4.05672	2.0304	1.9723
												0.938	4.05672	2.0118	2.0205
												0.946	4.05617	2.0373	2.0163
												0.955	4.05617	2.0203	2.0248
												0.962	4.05617	2.03	2.0102
												0.972	4.05617	2.0363	2.0133
												0.979	4.05617	2.0378	2.0111
												0.988	4.05617	2.056	2.0358
												0.995	4.05617	2.0078	2.0171
												1.004	4.05617	2.0237	1.995
												1.013	4.05617	2.0316	1.9766
												1.021	4.05617	2.0363	1.9726
												1.03	4.05617	2.0146	2.0012
												1.037	4.05617	2.0057	1.9838
												1.046	4.05617	2.0396	2.016
												1.054	4.05617	2.0404	1.9752
												1.063	4.05617	2.0321	2.0043
												1.07	4.05617	2.0294	1.9987
												1.08	4.05617	2.0113	1.9988
												1.087	4.05617	2.0562	1.9817
												1.096	4.05617	1.9965	2.0128
												1.105	4.05617	2.0567	1.9854
												1.112	4.05617	2.0163	1.9954
												1.121	4.05617	2.0442	2.0137
												1.129	4.05617	2.0284	1.9894
												1.138	4.05617	2.0408	2.002
												1.146	4.05617	2.0459	1.9908
												1.155	4.05617	2.03	2.0015
												1.162	4.05617	2.0517	2.0011
												1.172	4.05617	2.0192	2.0223
												1.179	4.05617	2.0177	2.0084
												1.187	4.05617	2.0343	1.9955
												1.197	4.05617	2.0058	1.9974
												1.204	4.05617	2.0033	2.013
												1.213	4.05617	2.0282	2.0014
												1.221	4.05617	1.997	1.9878
												1.229	4.05617	2.0126	2.0123
												1.237	4.05617	2.0369	2.0108
												1.246	4.05617	2.0468	1.9953
												1.255	4.05617	2.0242	1.9914
												1.262	4.05617	2.0543	2.0139
												1.271	4.05617	2.0199	2.0151
												1.279	4.05617	2.0291	2.0254
												1.287	4.05617	2.0284	1.9941
												1.296	4.05617	2.0075	2.0031
												1.305	4.05617	2.0065	2.0013
												1.313	4.05617	2.0333	2.0131
												1.32	4.05617	2.0021	1.9937
												1.329	4.05617	2.0382	2.0018
												1.338	4.05617	2.0467	1.9921
												1.346	4.05617	2.0423	2.0043
												1.355	4.05617	2.0271	1.9932
												1.362	4.05617	2.0472	2.0085
												1.371	4.05617	2.0283	2.0042
												1.379	4.05617	2.0535	2.0244
												1.388	4.05617	2.0445	2.0265
												1.395	4.05617	1.9775	2.0179
												1.404	4.05617	2.0154	1.9786
												1.412	4.05617	2.0142	2.0089
												1.421	4.05617	2.033	2.0226
												1.429	4.05617	2.0212	2.0032
												1.437	4.05617	2.0181	1.9775
												1.446	4.05617	2.0234	1.9881
												1.454	4.05617	2.0184	1.9746
												1.463	4.05617	2.0192	2.0044
												1.47	4.05617	2.0284	2.0066
												1.48	4.05617	2.016	2.0022
												1.487	4.05617	2.0136	1.9977
												1.497	4.05617	2.0058	2.0122
												1.504	4.05617	2.0248	1.9697
												1.513	4.05617	2.0474	1.987
												1.52	4.05617	2.0043	1.9633
												1.53	4.05617	2.0372	2.0115
												1.537	4.05617	1.9966	2.0258
												1.546	4.05617	2.0272	1.9885
												1.554	4.05617	2.0384	2.0104
												1.563	4.05617	2.044	1.97
												1.57	4.05617	2.0231	1.986
												1.58	4.05617	2.0176	2.0096
												1.587	4.05617	2.0132	1.989
												1.596	4.05617	2.0103	2.0098
												1.604	4.05617	2.0277	2.0271
												1.613	4.05617	2.0472	2.0076
												1.62	4.05617	2.0282	2.0114
												1.63	4.05617	2.0424	2.0309
												1.637	4.05617	2.0663	1.9893
												1.646	4.05617	2	1.9958
												1.654	4.05617	2.0271	1.9897
												1.663	4.05617	2.0577	1.981
												1.671	4.05617	2.0277	1.9968
												1.68	4.05617	2.0405	1.9999
												1.687	4.05617	2.0633	2.0182
												1.695	4.05617	2.0294	2.004
												1.704	4.05617	2.0106	2.0071
												1.712	4.05617	2.016	2.0046
												1.721	4.05617	2.0287	1.9866
												1.73	4.05617	2.0416	2.007
												1.737	4.05617	2.0047	2.0241
												1.747	4.05617	2.0087	2.0121
												1.754	4.05617	2.0364	1.9832
												1.763	4.05617	2.0244	2.0144
												1.77	4.05617	2.0284	1.9772
												1.779	4.05617	2.0643	2.0032
												1.787	4.05617	2.0367	1.9944
												1.797	4.05617	2.0485	1.9882
												1.804	4.05617	2.0356	2.0099
												1.813	4.05617	2.0602	2.0199
												1.821	4.05617	2.0517	2.0086
												1.829	4.05617	2.0308	2.0243
												1.837	4.05617	2.0457	1.9711
												1.846	4.05617	2.0552	2.0193
												1.854	4.05617	2.0309	1.9896
												1.863	4.05617	2.0185	2.0024
												1.87	4.05617	2.0148	2.0145
												1.88	4.05617	2.0368	1.9952
												1.887	4.05617	2.0393	1.9952
												1.897	4.05617	2.0081	1.9826
												1.904	4.05617	2.0577	2.0287
												1.912	4.05617	2.0248	1.9784
												1.921	4.05617	2.03	1.9855
												1.929	4.05617	2.0301	2.004
												1.938	4.05617	2.0023	1.965
												1.945	4.05617	2.0053	2.0064
												1.955	4.05617	1.9928	2.0314
												1.962	4.05617	2.0295	1.9865
												1.971	4.05617	2.0296	1.9909
												1.979	4.05617	2.0495	1.9984
												1.988	4.05617	2.0276	1.9767
												1.995	4.05617	2.0167	1.9698
												2.004	4.05617	2.0041	2.0005
												2.012	4.05617	2.0183	2.0066
												2.021	4.05617	2.0287	1.9821
												2.03	4.05617	2.045	1.992
												2.037	4.05617	2.0413	1.9779
												2.045	4.05617	2.0331	2.0237
												2.054	4.05617	2.0248	1.9986
												2.063	4.05617	2.0234	1.9904
												2.07	4.05617	2.0463	1.9912
												2.08	4.05617	2.0415	1.9872
												2.087	4.05617	2.0111	1.9925
												2.096	4.05617	2.061	1.9943
												2.105	4.05617	2.0225	2.0059
												2.113	4.05617	2.0362	1.9903
												2.12	4.05617	2.0376	1.9815
												2.129	4.05617	2.0272	1.9877
												2.137	4.05617	2.0422	2.0103
												2.145	4.05617	2.0104	2.0165
												2.154	4.05617	2.0203	2.0086
												2.162	4.05617	2.0288	1.9952
												2.171	4.05617	2.0512	1.999
												2.179	4.05617	2.0202	1.9891
												2.187	4.05617	2.0276	2.012
												2.195	4.05617	2.0387	2.0213
												2.204	4.05617	2.0231	2.0014
												2.212	4.05617	2.0599	2.0156
												2.22	4.05617	2.0217	2.0093
												2.229	4.05617	2.0527	2.0185
												2.237	4.05617	2.0272	1.9973
												2.245	4.05617	2.0273	2.0008
												2.254	4.05617	2.0198	2.008
												2.263	4.05617	2.0335	2.0107
												2.27	4.05617	2.0359	1.9909
												2.279	4.05617	2.0313	2.0111
												2.287	4.05617	2.0304	1.9982
												2.295	4.05617	2.0215	2.0248
												2.304	4.05617	2.0373	2.0434
												2.312	4.05617	2.032	2.0293
												2.32	4.05617	2.049	2.0224
												2.328	4.05617	2.0643	2.0278
												2.337	4.05617	2.0197	1.9898
												2.345	4.05617	1.9934	1.9899
												2.353	4.05617	2.0128	1.9842
												2.362	4.05617	2.0327	2.03
												2.37	4.05617	2.0128	2.0195
												2.378	4.05617	2.0218	2.0244
												2.387	4.05617	2.0217	1.9935
												2.395	4.05617	2.0346	1.97
												2.405	4.05617	2.0452	1.9795
												2.412	4.05617	2.0265	1.9777
												2.42	4.05617	2.0097	1.9987
												2.429	4.05617	2.0248	2.013
												2.437	4.05617	2.0282	2.0303
												2.445	4.05617	2.0278	1.9958
												2.453	4.05617	2.0083	2.0034
												2.462	4.05617	2.0139	2.0077
												2.47	4.05617	2.0146	1.995
												2.478	4.05617	2.0163	1.9614
												2.487	4.05617	2.0248	2.0048
												2.496	4.05617	2.0292	1.9766
												2.504	4.05617	2.0338	1.9885
												2.512	4.05617	2.0133	2.0019
												2.521	4.05617	2.0154	2.0214
												2.528	4.05617	2.0354	2.0299
												2.537	4.05617	2.0555	2.0053
												2.546	4.05617	2.0231	1.9928
												2.553	4.05617	2.0281	2.0219
												2.563	4.05617	2.0102	2.0147
												2.57	4.05617	2.0119	1.9752
												2.579	4.05617	2.0382	2.0244
												2.588	4.05617	1.9999	1.9551
												2.597	4.05617	2.0398	1.9943
												2.604	4.05617	2.0359	2.0148
												2.612	4.05617	2.0242	1.9971
												2.621	4.05617	2.0133	2.0178
												2.628	4.05617	2.0238	2.0119
												2.638	4.05617	2.0413	2.019
												2.645	4.05617	1.9856	2.0109
												2.654	4.05617	2.0249	1.9881
												2.662	4.05617	2.0193	1.9823
												2.671	4.05617	2.0086	2.0018
												2.679	4.05617	2.0371	1.9968
												2.688	4.05617	2.0298	2.0034
												2.697	4.05617	2.0294	1.9761
												2.703	4.05617	2.0324	2.0238
												2.713	4.05617	2.0423	2.0136
												2.72	4.05617	2.0433	2.0148
												2.729	4.05617	2.0581	2.0221
												2.737	4.05617	2.0421	2.0084
												2.746	4.05617	2.0164	1.9952
												2.755	4.05617	2.0191	2.0091
												2.762	4.05617	1.9904	2.0252
												2.771	4.05617	2.0033	2.0007
												2.779	4.05617	2.0393	1.9709
												2.787	4.05617	2.0296	2.0157
												2.796	4.05617	2.0627	1.9973
												2.804	4.05617	2.0123	1.9963
												2.812	4.05617	2.049	2.0233
												2.821	4.05617	2.0091	1.9842
												2.829	4.05617	2.0238	1.9633
												2.838	4.05617	2.0351	1.983
												2.846	4.05617	2.0107	2.007
												2.854	4.05617	2.0287	2.0084
												2.862	4.05617	2.0378	1.9861
												2.871	4.05617	2.0122	2.0149
												2.879	4.05617	2.0499	1.9851
												2.888	4.05617	2.0546	1.9881
												2.897	4.05617	2.0367	1.9932
												2.903	4.05617	2.0475	2.001
												2.913	4.05617	2.0328	1.9785
												2.92	4.05617	2.0206	2.0128
												2.928	4.05617	2.0283	2.0266
												2.938	4.05617	2.0179	2.0238
												2.946	4.05617	2.0452	2.0193
												2.953	4.05617	2.0262	2.028
												2.963	4.05617	2.0351	1.9923
												2.97	4.05617	2.0279	2.0219
												2.979	4.05617	2.0469	2.0011
												2.988	4.05617	2.0582	2.0088
												2.995	4.05617	2.074	2.0008
												3.003	4.05617	2.0581	2.011
												3.013	4.05617	2.0627	1.9978
												3.02	4.05617	2.0403	1.9879
												3.029	4.05617	2.0635	1.9856
												3.038	4.05617	2.0409	1.9838
												3.045	4.05617	2.0306	2.0351
												3.054	4.05617	2.0434	2.0057
												3.063	4.05617	2.0244	2.0036
												3.07	4.05617	2.0491	2.0135
												3.078	4.05617	2.0424	2.0159
												3.087	4.05617	2.0332	2.0205
												3.097	4.05617	2.0307	2.0107
												3.103	4.05617	2.0106	2.0161
												3.113	4.05617	2.0297	2.0244
												3.12	4.05617	2.0513	2.0148
												3.129	4.05617	2.0365	1.9905
												3.137	4.05617	2.0446	1.9945
												3.146	4.05617	2.0208	2.002
												3.153	4.05617	2.032	2.0078
												3.163	4.05617	2.0492	2.0157
												3.17	4.05617	2.033	2.0112
												3.179	4.05617	2.0431	1.9932
												3.187	4.05617	2.0251	1.9995
												3.195	4.05617	1.9898	2.0276
												3.203	4.05617	2.0413	1.9839
												3.213	4.05617	2.0037	1.9995
												3.22	4.05617	2.0081	1.9927
												3.23	4.05617	2.016	2.0074
												3.236	4.05617	2.0342	2.0014
												3.246	4.05617	2.0493	2.0108
												3.253	4.05617	2.018	2.0104
												3.262	4.05617	2.0495	2.003
												3.271	4.05617	2.0342	1.9843
												3.278	4.05617	2.0524	1.9943
												3.287	4.05617	2.0215	2.0058
												3.296	4.05617	2.0204	1.9887
												3.303	4.05617	2.0128	1.9681
												3.313	4.05617	1.9911	2.0084
												3.32	4.05617	2.0523	2.022
												3.329	4.05617	2.0211	2.0069
												3.337	4.05617	2.0225	1.9964
												3.346	4.05617	1.9921	2.0041
												3.354	4.05617	2.0196	2.0057
												3.363	4.05617	2.0293	2.0069
												3.371	4.05617	2.0177	2.0218
												3.378	4.05617	2.0225	1.9822
												3.387	4.05617	2.015	1.993
												3.395	4.05617	2.0458	2.0165
												3.404	4.05617	2.042	2.0133
												3.413	4.05617	2.0303	2.026
												3.42	4.05617	2.0107	1.9828
												3.429	4.05617	2.0297	2.0017
												3.437	4.05617	2.0336	1.996
												3.446	4.05617	2.035	2.0051
												3.453	4.05617	2.0401	2.0029
												3.462	4.05617	2.046	1.9826
												3.47	4.05617	2.0192	1.9887
												3.479	4.05617	2.0541	1.9856
												3.486	4.05617	2.0382	2.0165
												3.497	4.05617	2.0402	1.9934
												3.503	4.05617	2.0288	1.9994
												3.512	4.05617	2.0502	1.9881
												3.52	4.05617	2.0441	2.0155
												3.529	4.05617	2.0001	1.9813
												3.537	4.05617	2.0336	2.0294
												3.546	4.05617	2.0242	2.0142
												3.554	4.05617	2.066	2.0216
												3.562	4.05617	2.0603	1.9996
												3.571	4.05617	2.0435	2.0073
												3.579	4.05617	2.037	2.011
												3.586	4.05617	2.0374	2.0095
												3.596	4.05617	2.042	2.0194
												3.603	4.05617	2.0179	2.0162
												3.612	4.05617	2.0149	1.9908
												3.62	4.05617	2.0607	1.9869
												3.629	4.05617	2.0364	2.0064
												3.637	4.05617	2.0411	2.0032
												3.646	4.05617	2.0384	2.0031
												3.654	4.05617	2.0523	2.0088
												3.661	4.05617	2.0398	1.9841
												3.671	4.05617	2.0431	1.9993
												3.678	4.05617	2.0445	1.9995
												3.688	4.05617	2.0099	2.0268
												3.695	4.05617	2.0395	1.9868
												3.703	4.05617	2.0341	2.0077
												3.711	4.05617	1.9897	1.9818
												3.72	4.05617	1.9824	2.0035
												3.729	4.05617	2.0234	2.0278
												3.736	4.05617	2.0121	2.0269
												3.746	4.05617	2.0087	2.0001
												3.753	4.05617	2.0068	2.0204
												3.762	4.05617	1.9985	2.0341
												3.771	4.05617	2.0201	2.0161
												3.778	4.05617	2.0288	2.0213
												3.787	4.05617	2.0202	2.0106
												3.795	4.05617	2.0337	2.0248
												3.803	4.05617	2.0506	2.0349
												3.811	4.05617	2.0431	2.0085
												3.821	4.05617	2.0242	2.0063
												3.828	4.05617	2.0297	2.019
												3.837	4.05617	2.0229	2.0074
												3.845	4.05617	2.0553	2.0126
												3.854	4.05617	2.0218	2.0347
												3.861	4.05617	2.0386	2.0173
												3.871	4.05617	2.0382	1.9752
												3.879	4.05617	2.0154	2.0107
												3.887	4.05617	2.0189	1.9917
												3.895	4.05617	2.0234	1.9869
												3.903	4.05617	2.0444	2.0012
												3.911	4.05617	2.0447	2.0045
												3.92	4.05617	2.0236	2.0278
												3.929	4.05617	2.0055	1.9987
												3.936	4.05617	2.035	1.9989
												3.946	4.05617	2.0405	2.0098
												3.953	4.05617	2.0355	2.016
												3.962	4.05617	2.0398	2.0238
												3.97	4.05617	2.0235	2.0024
												3.979	4.05617	2.0195	1.978
												3.987	4.05617	2.0468	2.0031
												3.995	4.05617	2.0577	2.0347
												4.003	4.05617	2.0609	2.0154
												4.011	4.05617	2.0527	2.0044
												4.021	4.05617	2.047	2.0079
												4.029	4.05617	2.0167	2.0188
												4.036	4.05617	2.0262	2.0015
												4.046	4.05617	2.0372	2.0136
												4.053	4.05617	2.0062	1.9872
												4.063	4.05617	2.0374	2.0346
												4.07	4.05617	2.0302	2.0012
												4.079	4.05617	2.0286	1.9871
												4.087	4.05617	2.0007	1.9988
												4.095	4.05617	2.0395	1.9663
												4.103	4.05617	2.0419	1.9761
												4.111	4.05617	2.055	1.994
												4.121	4.05617	2.0197	1.9664
												4.128	4.05617	2.0405	2.0257
												4.137	4.05617	2.0372	2.0016
												4.146	4.05617	2.0023	1.9624
												4.153	4.05617	2.0423	1.9856
												4.162	4.05617	2.0505	2.0245
												4.17	4.05617	2.0177	2.0155
												4.179	4.05617	1.995	1.9936
												4.188	4.05617	2.0414	1.9824
												4.195	4.05617	2.019	2.0277
												4.203	4.05617	2.0448	1.9927
												4.211	4.05617	2.0475	2.0096
												4.22	4.05617	2.0686	2.0219
												4.229	4.05617	2.0317	1.9932
												4.236	4.05617	2.0281	1.9958
												4.245	4.05617	2.0197	2.0151
												4.254	4.05617	2.0446	1.995
												4.261	4.05617	2.0324	2.0161
												4.271	4.05617	2.0077	2.0075
												4.278	4.05617	2.0123	2.0418
												4.287	4.05617	2.0352	2.0019
												4.296	4.05617	2.0179	2.0153
												4.303	4.05617	2.0255	2.0173
												4.312	4.05617	2.0231	1.9929
												4.32	4.05617	2.0363	2.0156
												4.329	4.05617	2.0579	2.0019
												4.336	4.05617	2.0424	2.0044
												4.346	4.05617	2.0748	2.0289
												4.353	4.05617	2.0619	2.0247
												4.362	4.05617	2.025	2.0268
												4.371	4.05617	2.0291	2.0205
												4.378	4.05617	2.0294	1.9944
												4.387	4.05617	2.0348	1.9887
												4.396	4.05617	2.0432	2.0066
												4.403	4.05617	2.0351	2.0111
												4.412	4.05617	2.0444	1.9966
												4.42	4.05617	2.019	1.9862
												4.429	4.05617	2.0273	1.9911
												4.436	4.05617	2.031	1.9989
												4.445	4.05617	2.0321	1.9998
												4.453	4.05617	2.0132	1.9884
												4.462	4.05617	2.026	2.0017
												4.47	4.05617	2.0386	1.9979
												4.479	4.05617	2.0129	2.0074
												4.487	4.05617	2.054	1.9975
												4.494	4.05617	2.0513	2.0169
												4.503	4.05617	2.0347	2.0058
												4.512	4.05617	2.0622	1.9884
												4.519	4.05617	2.0352	1.9828
												4.529	4.05617	2.0505	1.9948
												4.537	4.05617	2.0511	2.0307
												4.546	4.05617	2.023	2.0091
												4.553	4.05617	2.0377	2.0033
												4.562	4.05617	2.0496	2.0152
												4.569	4.05617	2.0505	1.9992
												4.579	4.05617	2.0566	2.0164
												4.587	4.05617	2.0461	2.0012
												4.595	4.05617	2.0575	1.9768
												4.603	4.05617	2.0625	1.9954
												4.613	4.05617	2.0408	2.0112
												4.619	4.05617	2.0595	2.0058
												4.628	4.05617	2.0106	1.9984
												4.637	4.05617	2.039	1.9947
												4.644	4.05617	2.0483	2.0282
												4.654	4.05617	2.0195	1.9677
												4.662	4.05617	2.0364	2.0043
												4.669	4.05617	2.031	2.0195
												4.679	4.05617	2.0453	2.0187
												4.687	4.05617	1.9966	1.9984
												4.696	4.05617	2.014	2.0117
												4.703	4.05617	2.0291	2.0125
												4.712	4.05617	2.0492	2.022
												4.719	4.05617	2.033	2.006
												4.729	4.05617	2.0141	1.9998
												4.736	4.05617	2.0318	2.014
												4.745	4.05617	2.0658	2.015
												4.754	4.05617	2.0411	1.9974
												4.761	4.05617	2.0418	1.986
												4.77	4.05617	2.0421	2.0035
												4.778	4.05617	2.044	2.0045
												4.786	4.05617	2.0468	2.0072
												4.795	4.05617	2.0316	2.0157
												4.804	4.05617	2.0445	2.0037
												4.812	4.05617	2.0254	2.024
												4.82	4.05617	2.0501	2.0236
												4.829	4.05617	2.027	1.9734
												4.836	4.05617	2.0395	2.0083
												4.845	4.05617	2.0554	2.0078
												4.854	4.05617	2.0484	2.0017
												4.861	4.05617	2.0525	1.9888
												4.87	4.05617	2.0349	1.9675
												4.878	4.05617	2.016	2.01
												4.887	4.05617	2.0335	2.0165
												4.894	4.05617	2.0389	1.9903
												4.905	4.05617	2.0414	1.9926
												4.911	4.05617	2.0429	2.0074
												4.921	4.05617	2.0318	2.025
												4.928	4.05617	2.0423	2.0083
												4.936	4.05617	2.0363	2.0059
												4.945	4.05617	2.0569	2.0179
												4.953	4.05617	2.0404	1.9858
												4.961	4.05617	2.0691	1.9882
												4.97	4.05617	2.0438	2.0153
												4.978	4.05617	2.0667	1.9871
												4.986	4.05617	2.0453	1.9655
												4.994	4.05617	2.0505	2.0069
												5.003	4.05617	2.0454	1.9844
												5.011	4.05617	2.0109	1.9953
												5.019	4.05617	2.0424	1.9977
												5.029	4.05617	2.0353	2.0209
												5.036	4.05617	2.0261	2.006
												5.044	4.05617	2.0109	1.9796
												5.054	4.05617	2.0507	2.0026
												5.061	4.05617	2.0449	2.0273
												5.07	4.05617	2.0275	2.0335
												5.078	4.05617	2.0305	1.9955
												5.086	4.05617	2.0391	2.0164
												5.095	4.05617	2.0456	2.0137
												5.103	4.05617	2.0239	2.0318
												5.112	4.05617	2.0504	1.9974
												5.119	4.05617	2.0495	1.9444
												5.129	4.05617	2.0477	1.9702
												5.136	4.05617	2.0311	1.9916
												5.145	4.05617	2.0349	2.0128
												5.153	4.05617	2.0293	2.0115
												5.162	4.05617	2.0295	2.0156
												5.169	4.05617	2.0404	2.0027
												5.179	4.05617	2.0338	1.981
												5.186	4.05617	2.0285	2.0201
												5.194	4.05617	2.0488	2.0257
												5.203	4.05617	2.0248	2.0079
												5.212	4.05617	2.0067	1.998
												5.219	4.05617	2.0349	1.9689
												5.229	4.05617	2.0543	2.0185
												5.236	4.05617	2.0383	2.0017
												5.246	4.05617	2.0131	1.9787
												5.253	4.05617	2.0283	1.9913
												5.262	4.05617	2.0375	2.0061
												5.269	4.05617	2.0686	2.0359
												5.279	4.05617	2.0198	2.0132
												5.286	4.05617	2.0392	2.0202
												5.296	4.05617	2.0258	2.025
												5.303	4.05617	2.0321	2.0432
												5.312	4.05617	2.038	2.0054
												5.319	4.05617	2.0258	2.0022
												5.329	4.05617	2.0376	2.0304
												5.336	4.05617	2.0408	2.0159
												5.345	4.05617	2.0343	2.005
												5.354	4.05617	2.0611	2.0111
												5.361	4.05617	2.023	2.0147
												5.37	4.05617	2.0532	2.0059
												5.378	4.05617	2.0527	2.0234
												5.387	4.05617	2.0172	2.0008
												5.394	4.05617	2.0486	2.033
												5.403	4.05617	2.0198	2.0444
												5.411	4.05617	2.0163	2.008
												5.42	4.05617	2.0209	2.0153
												5.429	4.05617	2.0445	2.0212
												5.436	4.05617	2.0378	2.029
												5.446	4.05617	2.0203	2.045
												5.453	4.05617	2.0478	2.0279
												5.461	4.05617	2.0146	2.0312
												5.47	4.05617	2.0285	2.0173
												5.478	4.05617	2.0202	2.0074
												5.487	4.05617	2.0183	1.9945
												5.494	4.05617	2.0247	1.9933
												5.503	4.05617	2.023	1.989
												5.511	4.05617	2.0086	2.0215
												5.52	4.05617	2.005	2.029
												5.528	4.05617	2.0066	2.015
												5.537	4.05617	2.0167	1.9964
												5.544	4.05617	2.0303	2.0149
												5.553	4.05617	2.0293	2.0025
												5.562	4.05617	2.0449	1.9926
												5.569	4.05617	2.0225	2.0153
												5.578	4.05617	2.0425	2.0029
												5.587	4.05617	2.0193	2.0073
												5.594	4.05617	2.0427	2.0215
												5.603	4.05617	2.0494	2.0064
												5.611	4.05617	2.0463	1.9872
												5.62	4.05617	2.038	2.0218
												5.629	4.05617	2.0294	2.0051
												5.636	4.05617	2.0442	2.0465
												5.645	4.05617	2.0182	2.0097
												5.652	4.05617	2.0313	2.0364
												5.662	4.05617	2.0281	2.0192
												5.669	4.05617	2.0316	2.0143
												5.678	4.05617	2.0526	2.0236
												5.687	4.05617	2.0596	1.984
												5.694	4.05617	2.0457	2.0091
												5.702	4.05617	2.0278	2.03
												5.711	4.05617	1.995	2.0135
												5.72	4.05617	2.0338	2.0259
												5.728	4.05617	2.0294	2.0246
												5.736	4.05617	2.0486	2.014
												5.745	4.05617	2.0297	2.0116
												5.752	4.05617	2.0185	1.9962
												5.762	4.05617	2.0375	2.0269
												5.769	4.05617	2.0339	2.0393
												5.778	4.05617	2.06	1.9823
												5.786	4.05617	2.0337	1.9991
												5.795	4.05617	2.0599	1.9967
												5.802	4.05617	2.0471	2.0025
												5.812	4.05617	2.0477	1.9873
												5.819	4.05617	2.0433	2.0195
												5.828	4.05617	2.0625	2.0121
												5.836	4.05617	2.053	2.0077
												5.845	4.05617	2.0544	2.0073
												5.852	4.05617	2.0413	2.0106
												5.862	4.05617	2.0268	2.0049
												5.869	4.05617	2.0213	2.0245
												5.878	4.05617	1.9799	2.0405
												5.886	4.05617	2.0213	2.0276
												5.897	4.05617	2.0298	2.0107
												5.902	4.05617	2.0527	2.0138
												5.911	4.05617	2.0127	2.0234
												5.919	4.05617	2.0073	2.0255
												5.927	4.05617	2.0387	2.0102
												5.937	4.05617	2.0416	2.0189
												5.944	4.05617	2.0482	2.0164
												5.953	4.05617	2.0417	2.0009
												5.961	4.05617	2.0446	2.0329
												5.969	4.05617	2.0575	2.0044
												5.978	4.05617	2.0245	1.9896
												5.987	4.05617	2.0582	2.0131
												5.994	4.05617	2.0359	2.0125
												6.002	4.05617	2.0484	2.0162
												6.011	4.05617	2.0194	2.0156
												6.019	4.05617	2.0246	2.013
												6.027	4.05617	2.0516	2.0029
												6.036	4.05617	2.0403	2.005
												6.045	4.05617	2.0196	1.9861
												6.052	4.05617	2.0294	1.9905
												6.061	4.05617	2.0439	1.9778
												6.07	4.05617	2.0366	2.0093
												6.077	4.05617	2.0389	2.0153
												6.087	4.05617	2.0332	2.0055
												6.094	4.05617	2.0491	2.0374
												6.102	4.05617	2.0574	2.0204
												6.111	4.05617	2.028	1.9569
												6.119	4.05617	2.0183	2.0123
												6.128	4.05617	2.0523	2.0142
												6.136	4.05617	2.0231	2.0021
												6.145	4.05617	2.0235	2.0313
												6.154	4.05617	2.0131	2.0101
												6.161	4.05617	2.0092	2.0254
												6.17	4.05617	2.0268	2.0031
												6.179	4.05617	2.0636	2.0262
												6.186	4.05617	2.0189	2.0167
												6.196	4.05617	2.0541	1.9804
												6.203	4.05617	2.0343	1.9906
												6.211	4.05617	2.0446	1.996
												6.22	4.05617	2.0354	2.0033
												6.227	4.05617	2.0662	2.0173
												6.237	4.05617	2.0141	1.9886
												6.244	4.05617	2.0394	2.0261
												6.253	4.05617	2.0516	1.9674
												6.261	4.05617	2.034	1.9906
												6.269	4.05617	2.0524	1.9788
												6.278	4.05617	2.0377	2.0107
												6.286	4.05617	2.0256	1.9926
												6.294	4.05617	2.0506	1.9893
												6.303	4.05617	2.0097	1.988
												6.311	4.05617	2.0457	1.9976
												6.32	4.05617	2.0481	2.0193
												6.327	4.05617	2.0468	2.0181
												6.337	4.05617	2.0238	2.0063
												6.344	4.05617	2.0239	2.0155
												6.353	4.05617	2.0333	1.9903
												6.362	4.05617	2.0623	2.0172
												6.369	4.05617	2.0614	1.9789
												6.377	4.05617	2.0733	2.0163
												6.387	4.05617	2.0567	1.9965
												6.394	4.05617	2.0359	2.0056
												6.402	4.05617	2.0061	2.0122
												6.411	4.05617	2.0139	1.9937
												6.419	4.05617	2.0386	1.9859
												6.428	4.05617	2.0534	2.0179
												6.436	4.05617	2.0279	2.0022
												6.445	4.05617	2.043	1.998
												6.452	4.05617	2.0511	1.9599
												6.461	4.05617	2.0237	2.0167
												6.469	4.05617	2.0473	2.0006
												6.477	4.05617	2.0471	1.9698
												6.486	4.05617	2.0334	2.0216
												6.494	4.05617	2.0591	2.0264
												6.502	4.05617	2.0144	1.9895
												6.512	4.05617	2.0339	2.0248
												6.519	4.05617	2.0327	2.0095
												6.527	4.05617	2.0246	2.001
												6.536	4.05617	2.0514	1.9956
												6.544	4.05617	2.0675	1.9985
												6.553	4.05617	2.0555	2.0071
												6.561	4.05617	2.0406	2.0132
												6.569	4.05617	2.0578	2.0039
												6.578	4.05617	2.0175	1.987
												6.586	4.05617	2.032	2.0143
												6.594	4.05617	2.0488	2.0123
												6.603	4.05617	2.0466	2.0039
												6.611	4.05617	2.0343	2.0102
												6.62	4.05617	2.0298	2.0263
												6.627	4.05617	2.0281	2.014
												6.636	4.05617	2.0551	1.998
												6.645	4.05617	2.0359	2.005
												6.652	4.05617	2.0455	2.0227
												6.662	4.05617	2.0487	2.0264
												6.669	4.05617	2.0354	2.0261
												6.677	4.05617	2.0203	2.021
												6.686	4.05617	2.0517	2.0072
												6.694	4.05617	2.0625	2.0091
												6.702	4.05617	2.0485	2.0083
												6.71	4.05617	2.0126	2.0115
												6.719	4.05617	2.0349	1.9983
												6.728	4.05617	2.0393	1.9937
												6.736	4.05617	2.0084	2.0006
												6.745	4.05617	2.0049	2.0148
												6.752	4.05617	2.0314	2.0138
												6.762	4.05617	2.0367	2.0334
												6.769	4.05617	2.0271	2.0065
												6.777	4.05617	2.0284	2.0051
												6.786	4.05617	2.0508	1.9762
												6.794	4.05617	2.024	2.0143
												6.802	4.05617	2.0576	1.996
												6.811	4.05617	2.0565	2.045
												6.82	4.05617	2.0483	2.0108
												6.827	4.05617	2.0433	2.0176
												6.836	4.05617	2.0564	2.0313
												6.844	4.05617	2.0327	1.9895
												6.853	4.05617	2.0394	1.9801
												6.86	4.05617	2.0279	2.029
												6.87	4.05617	2.0571	2.0052
												6.877	4.05617	2.0241	2.0276
												6.887	4.05617	2.0393	2.0092
												6.894	4.05617	2.0286	2.0071
												6.902	4.05617	2.0468	2.018
												6.91	4.05617	2.0472	2.0242
												6.92	4.05617	2.0371	2.0199
												6.928	4.05617	2.0512	2.0214
												6.936	4.05617	2.0542	2.0083
												6.944	4.05617	2.0142	1.9703
												6.953	4.05617	2.0498	1.9813
												6.96	4.05617	2.0281	2.0159
												6.97	4.05617	2.0384	1.9706
												6.977	4.05617	2.0449	2.0075
												6.985	4.05617	2.0121	2.028
												6.995	4.05617	2.0184	1.9865
												7.002	4.05617	2.0376	2.0257
												7.012	4.05617	2.0286	1.9978
												7.019	4.05617	2.0816	1.9951
												7.028	4.05617	2.0341	2.0236
												7.035	4.05617	2.027	2.007
												7.044	4.05617	2.0644	2.0014
												7.053	4.05617	2.0233	2.0013
												7.061	4.05617	2.0501	2.0069
												7.069	4.05617	2.0525	2.0122
												7.078	4.05617	2.0097	2.0164
												7.085	4.05617	2.0276	1.9948
												7.094	4.05617	2.0398	1.9915
												7.102	4.05617	2.0288	2.0121
												7.111	4.05617	2.0343	2.0008
												7.119	4.05617	2.0378	2.0106
												7.128	4.05617	2.0513	2.0075
												7.135	4.05617	2.0383	2.0128
												7.145	4.05617	2.0352	1.9988
												7.153	4.05617	2.0408	1.9844
												7.161	4.05617	2.0229	2.0023
												7.169	4.05617	2.0424	2.0271
												7.178	4.05617	2.0131	2.0205
												7.185	4.05617	2.0368	2.0158
												7.196	4.05617	1.9898	2.0214
												7.202	4.05617	2.0272	2.0012
												7.211	4.05617	2.0301	2.0112
												7.22	4.05617	2.0245	2.0408
												7.227	4.05617	2.0349	2.0262
												7.235	4.05617	2.0179	1.9958
												7.245	4.05617	2.0379	2.0274
												7.252	4.05617	2.0207	1.9892
												7.261	4.05617	2.0395	2.0101
												7.269	4.05617	2.0322	2.0114
												7.278	4.05617	2.04	2.0294
												7.285	4.05617	2.0238	2.0374
												7.294	4.05617	2.0382	1.9884
												7.302	4.05617	2.0505	2.0256
												7.311	4.05617	2.0402	2.0305
												7.32	4.05617	2.0234	2.016
												7.328	4.05617	2.0593	2.0158
												7.335	4.05617	2.0471	2.0204
												7.345	4.05617	2.0268	2.0016
												7.353	4.05617	2.0248	1.9992
												7.36	4.05617	2.0158	1.9827
												7.37	4.05617	2.02	2.0165
												7.377	4.05617	2.0354	2.0239
												7.386	4.05617	2.0409	2.039
												7.394	4.05617	2.0166	2.0227
												7.402	4.05617	2.0259	2.0105
												7.41	4.05617	2.0163	2.0217
												7.419	4.05617	2.0185	2.0156
												7.428	4.05617	2.0381	2.0164
												7.435	4.05617	2.0363	2.0195
												7.445	4.05617	2.0306	2.0121
												7.452	4.05617	2.0467	1.997
												7.461	4.05617	2.0608	2.0042
												7.469	4.05617	2.0212	2.0114
												7.478	4.05617	2.0255	1.9983
												7.485	4.05617	2.0475	1.9971
												7.495	4.05617	2.03	1.9901
												7.502	4.05617	2.0393	2.0021
												7.511	4.05617	2.0256	1.9849
												7.52	4.05617	2.0505	1.9948
												7.527	4.05617	2.0058	2.0069
												7.536	4.05617	1.9925	2.0051
												7.544	4.05617	2.0284	2.0231
												7.553	4.05617	2.0587	2.0042
												7.56	4.05617	2.0418	2.0235
												7.569	4.05617	2.0262	2.0043
												7.577	4.05617	2.0416	2.0043
												7.586	4.05617	2.0419	1.9998
												7.594	4.05617	2.0329	1.9725
												7.602	4.05617	2.0345	1.9699
												7.611	4.05617	2.0421	1.992
												7.619	4.05617	2.0366	2.029
												7.628	4.05617	2.026	2.0169
												7.635	4.05617	2.05	1.9996
												7.644	4.05617	2.0585	2.0233
												7.652	4.05617	2.0426	1.9922
												7.661	4.05617	2.0357	2.0353
												7.669	4.05617	2.0308	2.0019
												7.678	4.05617	2.0367	2.0175
												7.685	4.05617	2.0466	2.004
												7.694	4.05617	2.0338	2.0077
												7.702	4.05617	2.0516	2.0066
												7.711	4.05617	2.0608	2.0135
												7.719	4.05617	2.0533	1.9961
												7.728	4.05617	2.0524	2.0127
												7.735	4.05617	2.0317	1.9874
												7.744	4.05617	2.0442	1.9732
												7.752	4.05617	2.0581	2.022
												7.761	4.05617	2.0341	2.0188
												7.768	4.05617	2.0544	2.0129
												7.778	4.05617	2.0347	2.0117
												7.785	4.05672	2.0375	1.9921
												7.794	4.05672	2.0336	2.0348
												7.802	4.05672	2.0225	1.9976
												7.81	4.05672	1.9823	2.0179
												7.819	4.05672	2.0375	2.0192
												7.827	4.05672	2.0192	1.9947
												7.835	4.05672	2.0412	1.9953
												7.844	4.05672	2.0006	2.0204
												7.852	4.05672	2.0271	2.0389
												7.86	4.05672	2.0236	2.004
												7.868	4.05672	2.012	1.9848
												7.877	4.05672	2.024	2.0226
												7.886	4.05672	2.0224	2.0529
												7.894	4.05672	2.007	2.0186
												7.903	4.05672	1.9888	2.0061
												7.91	4.05672	2.0086	1.9899
												7.919	4.05672	2.0302	1.9819
												7.927	4.05672	2.0515	2.0183
												7.935	4.05672	2.009	2.0294
												7.944	4.05672	2.0232	2.0144
												7.953	4.05672	2.0328	1.9865
												7.96	4.05672	2.0198	1.9996
												7.969	4.05672	2.0552	2.0116
												7.978	4.05672	2.0395	2.0266
												7.986	4.05672	2.0397	2.0105
												7.993	4.05672	2.0522	2.0014
												8.002	4.05672	2.0326	2.0105
												8.01	4.05672	2.0339	1.9969
												8.019	4.05672	2.0024	2.01
												8.027	4.05672	2.0188	2.0293
												8.036	4.05672	2.0188	2.0162
												8.043	4.05672	1.982	1.999
												8.053	4.05672	2.0313	1.9867
												8.06	4.05672	2.0429	2.0399
												8.07	4.05672	2.0403	2.0072
												8.077	4.05672	2.0245	1.995
												8.086	4.05672	2.0139	2.0313
												8.093	4.05672	2.0241	2.0262
												8.102	4.05672	2.0326	1.987
												8.11	4.05672	2.0516	2.0212
												8.119	4.05672	2.0394	1.9813
												8.128	4.05672	2.0076	2.0091
												8.135	4.05672	2.0179	2.0023
												8.144	4.05672	2.0275	2.0269
												8.152	4.05672	2.0266	2.0013
												8.16	4.05672	2.0532	2.0033
												8.169	4.05672	2.0492	2.015
												8.178	4.05672	2.0553	1.9808
												8.186	4.05672	2.0547	2.0001
												8.193	4.05672	2.0315	2.0343
												8.202	4.05672	2.0341	2.0257
												8.211	4.05672	2.0466	2.0208
												8.218	4.05672	2.0302	1.9659
												8.228	4.05672	2.0324	1.9885
												8.236	4.05672	2.03	2.0138
												8.244	4.05672	2.0499	2.0121
												8.253	4.05672	2.043	2.0167
												8.26	4.05672	2.0544	2.0204
												8.269	4.05672	2.0534	2.0426
												8.277	4.05672	2.0562	2.0236
												8.286	4.05672	2.03	2.002
												8.295	4.05672	2.035	2.026
												8.302	4.05672	2.0274	1.9992
												8.311	4.05672	2.0447	2.0283
												8.318	4.05672	2.0187	2.0152
												8.328	4.05672	2.0375	2.0314
												8.335	4.05672	2.0353	2.0122
												8.345	4.05672	2.0209	1.9912
												8.352	4.05672	2.0253	1.9875
												8.361	4.05672	2.0302	1.9888
												8.368	4.05672	2.0097	2.035
												8.378	4.05672	2.0194	2.0251
												8.386	4.05672	2.0188	2.0399
												8.393	4.05672	1.9995	2.033
												8.402	4.05672	2.0468	2.0189
												8.41	4.05672	2.0243	2.0195
												8.419	4.05672	2.0548	2.0338
												8.427	4.05672	2.0439	2.021
												8.436	4.05672	2.0272	1.9981
												8.444	4.05672	2.022	1.9879
												8.453	4.05672	2.0352	1.9875
												8.46	4.05672	2.0022	2.0048
												8.469	4.05672	2.0432	2.0006
												8.477	4.05672	2.0264	2.0046
												8.486	4.05672	2.0391	2.0206
												8.495	4.05672	2.0272	1.9898
												8.502	4.05672	2.0187	2.0193
												8.511	4.05672	2.0215	1.9972
												8.519	4.05672	2.0146	2.0094
												8.527	4.05672	1.9976	2.0367
												8.536	4.05672	2.0174	2.0074
												8.543	4.05672	2.0539	2.0146
												8.552	4.05672	2.0225	2.0133
												8.561	4.05672	2.024	1.998
												8.57	4.05672	2.0204	1.9983
												8.577	4.05672	2.022	1.9999
												8.586	4.05672	2.0221	1.9911
												8.593	4.05672	2.0178	1.9909
												8.602	4.05672	2.0339	1.9879
												8.611	4.05672	2.0492	1.9978
												8.618	4.05672	2.0315	2.0219
												8.627	4.05672	2.0072	1.9922
												8.635	4.05672	2.0255	2.0164
												8.644	4.05672	2.0042	1.9896
												8.653	4.05672	2.0094	1.984
												8.661	4.05672	2.0254	1.9988
												8.669	4.05672	1.9939	1.9987
												8.677	4.05672	2.0405	2.0164
												8.686	4.05672	2.0323	2.0199
												8.695	4.05672	2.0105	2.03
												8.702	4.05672	2.0087	2.0285
												8.711	4.05672	2.0366	2.0178
												8.719	4.05672	2.032	2.0092
												8.728	4.05672	2.0429	2.0182
												8.735	4.05672	2.0301	2.0339
												8.745	4.05672	2.0177	1.9874
												8.753	4.05672	2.0496	1.9733
												8.761	4.05672	2.0088	2.0061
												8.768	4.05672	2.0297	1.9963
												8.777	4.05672	2.0216	2.0036
												8.785	4.05672	2.0202	1.9896
												8.794	4.05672	2.03	2.0096
												8.802	4.05672	2.0361	1.9913
												8.81	4.05672	2.0279	2.001
												8.818	4.05672	2.013	1.9981
												8.828	4.05672	2.0137	2.0184
												8.835	4.05672	2.0081	1.999
												8.844	4.05672	2.008	2.0445
												8.853	4.05672	1.9698	2.0322
												8.861	4.05672	2.0289	2.0004
												8.868	4.05672	2.0217	2.0238
												8.877	4.05672	2.0476	2.003
												8.885	4.05672	2.0091	2.0037
												8.893	4.05672	1.9965	2.015
												8.902	4.05672	2.0399	2.0107
												8.911	4.05672	2.0067	2.0082
												8.919	4.05672	2.0537	2.0199
												8.927	4.05672	2.0617	2.0071
												8.936	4.05672	2.0055	1.9788
												8.944	4.05672	2.0366	2.0242
												8.953	4.05672	2.0006	1.9863
												8.961	4.05672	2.0225	1.9997
												8.97	4.05672	2.0015	2.0242
												8.977	4.05672	2.0057	2.0021
												8.986	4.05672	1.9751	2.0024
												8.993	4.05672	2.0378	2.0074
												9.001	4.05672	2.0076	2.0387
												9.011	4.05672	2.0419	1.9946
												9.018	4.05672	2.0451	2.0079
												9.028	4.05672	2.0337	2.0047
												9.035	4.05672	2.02	2.0247
												9.044	4.05672	2.0324	2.0181
												9.051	4.05672	2.0175	2.0251
												9.061	4.05672	2.0477	2.006
												9.069	4.05672	2.0314	2.0237
												9.077	4.05672	2.0534	1.9814
												9.086	4.05672	2.0447	1.9947
												9.093	4.05672	2.0252	1.992
												9.101	4.05672	2.0347	2.0045
												9.11	4.05672	2.046	2.0026
												9.119	4.05672	2.035	2.0183
												9.128	4.05672	2.0405	2.0339
												9.136	4.05672	2.0424	2.0123
												9.143	4.05672	2.0272	1.999
												9.152	4.05672	2.0527	2.0162
												9.161	4.05672	2.0075	2.04
												9.168	4.05672	2.0464	2.0227
												9.177	4.05672	2.0271	1.991
												9.186	4.05672	2.024	2.004
												9.193	4.05672	2.039	2.0308
												9.202	4.05672	2.0275	1.9891
												9.21	4.05672	1.9973	2.0057
												9.219	4.05672	2.0454	2.0078
												9.228	4.05672	2.0323	1.9983
												9.235	4.05672	2.0387	2.0029
												9.244	4.05672	2.028	2.0363
												9.251	4.05672	2.036	2.0135
												9.261	4.05672	2.0381	1.9962
												9.269	4.05672	2.0389	2.0217
												9.276	4.05672	2.0384	2.0059
												9.286	4.05672	2.0532	2.0008
												9.293	4.05672	2.0302	1.9796
												9.301	4.05672	2.0204	2.0374
												9.311	4.05672	2.0024	2.0112
												9.319	4.05672	2.0374	2.0117
												9.326	4.05672	2.0335	1.9845
												9.336	4.05672	2.0417	2.0164
												9.344	4.05672	2.0502	2.0071
												9.351	4.05672	2.0459	1.9952
												9.361	4.05672	2.0646	2.0149
												9.369	4.05672	2.0195	2.0136
												9.376	4.05672	2.0159	2.0033
												9.386	4.05672	2.0141	1.9885
												9.394	4.05672	2.0167	2.0082
												9.401	4.05672	2.0278	1.9697
												9.411	4.05672	2.0014	1.9713
												9.419	4.05672	2.0162	2.0151
												9.427	4.05672	2.019	2.0123
												9.435	4.05672	2.0132	1.9922
												9.444	4.05672	2.0031	1.9715
												9.451	4.05672	2.0203	2.0006
												9.461	4.05672	2.0531	2.02
												9.468	4.05672	2.0414	1.9985
												9.477	4.05672	2.0327	1.9741
												9.485	4.05672	2.0435	1.9996
												9.493	4.05672	2.0133	2.0101
												9.503	4.05672	2.0035	1.9844
												9.51	4.05672	2.02	1.9982
												9.519	4.05672	2.0562	2.0098
												9.527	4.05672	2.014	1.9918
												9.535	4.05672	2.0224	1.9966
												9.544	4.05672	2.0291	2.0252
												9.551	4.05672	2.0312	2.0138
												9.561	4.05672	2.0322	1.9723
												9.568	4.05672	2.0512	1.9969
												9.577	4.05672	2.011	1.9964
												9.585	4.05672	2.0236	1.9956
												9.594	4.05672	2.0338	1.9835
												9.603	4.05672	2.031	2.0184
												9.61	4.05672	2.0557	1.9999
												9.619	4.05672	2.0416	2.0046
												9.628	4.05672	2.0153	2.0147
												9.635	4.05672	2.0254	2.0017
												9.644	4.05672	2.0465	1.9815
												9.652	4.05672	2.0582	2.0047
												9.66	4.05672	2.0664	2.0288
												9.669	4.05672	2.0209	1.9889
												9.676	4.05672	2.0336	2.0243
												9.686	4.05672	2.0365	2.0216
												9.693	4.05672	2.0505	2.0195
												9.701	4.05672	2.0349	1.9974
												9.71	4.05672	2.0244	1.9846
												9.719	4.05672	2.0648	2.0176
												9.726	4.05672	2.0058	2.0287
												9.736	4.05672	2.0261	2.043
												9.743	4.05672	2.0022	2.026
												9.751	4.05672	1.9845	2.039
												9.76	4.05672	2.0161	1.9977
												9.768	4.05672	2.0164	1.9975
												9.776	4.05672	2.0418	1.9981
												9.785	4.05672	2.0487	2.0078
												9.793	4.05672	2.0477	2.0176
												9.802	4.05672	2.0341	1.9854
												9.81	4.05672	2.0152	2.0396
												9.818	4.05672	2.0028	2.032
												9.826	4.05672	2.0537	2.0453
												9.837	4.05672	2.0144	2.0242
												9.843	4.05672	2.0398	2.026
												9.852	4.05672	2.061	2.0392
												9.86	4.05672	2.0439	2.0088
												9.868	4.05672	2.0511	2.0284
												9.877	4.05672	2.0368	2.0386
												9.885	4.05672	2.0399	1.9894
												9.895	4.05672	2.0039	2.0281
												9.901	4.05672	1.9873	2.007
												9.91	4.05672	2.0166	1.9891
												9.918	4.05672	2.0517	1.9941
												9.928	4.05672	2.0367	1.9979
												9.935	4.05672	2.0143	1.9757
												9.944	4.05672	2.0317	2.0106
												9.952	4.05672	2.0455	1.9829
												9.96	4.05672	2.0355	2.0194
												9.969	4.05672	2.0165	2.0038
												9.978	4.05672	2.0378	2.0018
												9.984	4.05672	2.0505	2.0157
												9.994	4.05672	2.0428	2.0072
												10.002	4.05672	2.0616	2.0294
												10.009	4.05672	2.026	1.9907
												10.018	4.05672	2.0097	2.001
												10.027	4.05672	2.0246	2.0198
												10.034	4.05672	2.0381	2.0428
												10.044	4.05672	2.0458	1.9941
												10.051	4.05672	2.0287	2.0287
												10.06	4.05672	2.0386	1.9843
												10.068	4.05672	2.0439	2.0126
												10.077	4.05672	2.0355	2.0029
												10.084	4.05672	2.0219	1.9977
												10.094	4.05672	2.0286	2.0143
												10.101	4.05672	2.0189	1.9862
												10.11	4.05672	2.0374	1.9991
												10.118	4.05672	1.996	2.0222
												10.127	4.05672	2.0408	1.9924
												10.134	4.05672	2.0073	1.9809
												10.144	4.05672	2.033	2.0408
												10.152	4.05672	2.0201	1.9889
												10.161	4.05672	2.0226	1.9861
												10.168	4.05672	2.0087	2.0051
												10.177	4.05672	2.0455	2.0017
												10.184	4.05672	2.031	2.0098
												10.193	4.05672	2.0168	2.0062
												10.202	4.05672	2.0244	2.0147
												10.211	4.05672	2.0229	2.011
												10.218	4.05672	2.0194	2.0056
												10.227	4.05672	2.0562	2.0123
												10.235	4.05672	2.0255	2.0168
												10.244	4.05672	2.0426	1.994
												10.252	4.05672	2.0512	1.9936
												10.259	4.05672	2.0376	2.0051
												10.269	4.05672	2.0157	1.9837
												10.276	4.05672	2.0545	2.0097
												10.285	4.05672	2.0199	2.0314
												10.294	4.05672	2.0278	1.9751
												10.301	4.05672	2.0498	2.0352
												10.309	4.05672	2.036	2.0194
												10.319	4.05672	2.0388	2.0071
												10.326	4.05672	2.034	2.0049
												10.336	4.05672	2.0249	2.0089
												10.343	4.05672	2.0239	1.9975
												10.352	4.05672	2.0174	2.0036
												10.359	4.05672	2.041	2.0151
												10.369	4.05672	2.0333	2.0173
												10.376	4.05672	2.0279	2.0366
												10.385	4.05672	2.043	2.0019
												10.393	4.05672	2.0359	1.9916
												10.401	4.05672	2.0204	1.9869
												10.409	4.05672	2.017	2.019
												10.419	4.05672	2.0277	2.0061
												10.426	4.05672	2.0483	2.0068
												10.435	4.05672	2.0642	2.0363
												10.444	4.05672	2.0419	2.0263
												10.451	4.05672	2.0366	2.0245
												10.46	4.05672	2.0489	2.0161
												10.469	4.05672	2.0288	2.0013
												10.476	4.05672	1.9912	2.0201
												10.485	4.05672	2.0413	2.0282
												10.493	4.05672	2.0602	2.0438
												10.501	4.05672	2.0438	2.0311
												10.51	4.05672	2.0138	2.017
												10.519	4.05672	2.0348	2.0178
												10.526	4.05672	1.9862	2.0024
												10.535	4.05672	2.0264	2.0029
												10.543	4.05672	2.0267	2.0158
												10.552	4.05672	2.0204	2.0366
												10.56	4.05672	2.0133	1.9939
												10.568	4.05672	2.0194	2.0046
												10.576	4.05672	2.0417	2.0209
												10.586	4.05672	2.0315	2.0263
												10.593	4.05672	2.0621	2.0167
												10.601	4.05672	2.0338	2.0277
												10.611	4.05672	2.0369	2.0197
												10.618	4.05672	2.0419	1.9995
												10.627	4.05672	2.0417	1.9986
												10.634	4.05672	2.0549	1.9984
												10.643	4.05672	2.0323	1.9991
												10.652	4.05672	2.0439	1.9556
												10.66	4.05672	2.0346	1.9903
												10.669	4.05672	2.0321	2.032
												10.677	4.05672	2.0283	2.0224
												10.684	4.05672	2.0558	2.0344
												10.693	4.05672	2.0312	1.999
												10.701	4.05672	2.0236	2.0174
												10.711	4.05672	2.0324	1.9927
												10.718	4.05672	2.0348	1.9665
												10.727	4.05672	2.0362	2.031
												10.734	4.05672	2.0737	2.0211
												10.744	4.05672	2.0375	2.0085
												10.752	4.05672	2.0437	2.0283
												10.759	4.05672	2.028	2.0093
												10.769	4.05672	2.0325	2.0118
												10.777	4.05672	2.0564	2.0227
												10.784	4.05672	2.0487	2.0091
												10.794	4.05672	2.0439	2.0231
												10.802	4.05672	2.0282	2.0055
												10.81	4.05672	2.0259	1.9998
												10.818	4.05672	2.0434	2.0396
												10.826	4.05672	2.0202	2.0095
												10.835	4.05672	2.0228	2.0047
												10.844	4.05672	2.0398	1.9965
												10.852	4.05672	2.0031	2.0077
												10.859	4.05672	1.9921	2.0054
												10.869	4.05672	2.0388	2.0097
												10.876	4.05672	2.0403	2.0139
												10.886	4.05672	2.0287	2.0144
												10.893	4.05672	2.0252	1.993
												10.901	4.05672	2.0351	2.0121
												10.91	4.05672	2.0427	2.0413
												10.919	4.05672	2.0607	2.0134
												10.927	4.05672	2.043	2.0177
												10.934	4.05672	2.0564	2.0031
												10.943	4.05672	2.0166	2.0002
												10.952	4.05672	2.0313	2.0092
												10.961	4.05672	2.0167	2.0252
												10.968	4.05672	2.0131	2.0281
												10.976	4.05672	1.9762	1.9816
												10.985	4.05672	1.969	2.0166
												10.993	4.05672	2.0439	1.9775
												11.003	4.05672	2.0045	2.0127
												11.009	4.05672	2.0127	1.9962
												11.018	4.05672	2.0266	1.9896
												11.026	4.05672	2.0162	2.0219
												11.035	4.05672	2.0397	2.0338
												11.043	4.05672	2.0668	2.0355
												11.051	4.05672	2.0176	2.039
												11.06	4.05672	2.0317	2.0162
												11.068	4.05672	2.0078	2.0154
												11.076	4.05672	2.0278	2.0265
												11.084	4.05672	2.0093	1.9989
												11.093	4.05672	2.0357	2.0264
												11.103	4.05672	2.0116	2.0266
												11.109	4.05672	2.0365	2.0121
												11.118	4.05672	2.0204	2.0311
												11.127	4.05672	2.0449	2.0155
												11.134	4.05672	2.0539	2.003
												11.143	4.05672	2.0456	2.0409
												11.151	4.05672	2.0485	1.9908
												11.159	4.05672	2.0172	2.0007
												11.167	4.05672	2.0399	1.9992
												11.177	4.05672	2.0398	2.0084
												11.185	4.05672	2.0565	2.0416
												11.193	4.05672	2.0488	2.0147
												11.201	4.05672	2.0327	1.9895
												11.209	4.05672	2.0458	2.0561
												11.219	4.05672	2.0147	2.0241
												11.227	4.05672	2.051	1.9967
												11.234	4.05672	2.0447	2.0245
												11.243	4.05672	2.0078	2.0006
												11.251	4.05672	2.0227	2.007
												11.26	4.05672	2.0348	2.0282
												11.268	4.05672	2.0312	2.0337
												11.277	4.05672	2.0435	2.0432
												11.284	4.05672	2.0135	2.0394
												11.293	4.05672	2.0536	2.0259
												11.302	4.05672	2.0299	1.9876
												11.31	4.05672	2.0282	1.9887
												11.318	4.05672	2.0198	1.9929
												11.326	4.05672	2.025	2.0091
												11.335	4.05672	2.0185	2.0202
												11.344	4.05672	2.0402	2.0225
												11.351	4.05672	2.049	2.0058
												11.359	4.05672	2.0644	2.0234
												11.368	4.05672	2.025	1.9849
												11.376	4.05672	2.0227	2.0214
												11.385	4.05672	2.0099	2.0124
												11.394	4.05672	2.012	2.0201
												11.401	4.05672	2.0022	2.0322
												11.41	4.05672	1.9945	2.0011
												11.418	4.05672	2.0515	2.005
												11.426	4.05672	2.0204	2.0128
												11.435	4.05672	2.0001	2.0003
												11.444	4.05672	2.0241	2.0209
												11.451	4.05672	2.0249	2.0168
												11.46	4.05672	2.0386	2.0354
												11.467	4.05672	2.0351	2.0107
												11.477	4.05672	2.0328	1.9455
												11.484	4.05672	2.0331	1.9524
												11.494	4.05672	2.0551	2.026
												11.501	4.05672	2.0499	2.0177
												11.51	4.05672	2.0578	1.9992
												11.519	4.05672	2.02	2.0047
												11.527	4.05672	2.0395	2.025
												11.534	4.05672	2.0364	1.9893
												11.543	4.05672	2.0462	1.9982
												11.552	4.05672	2.0408	2.0209
												11.559	4.05672	1.9946	2.0147
												11.567	4.05672	2.0155	2.0036
												11.576	4.05672	2.0324	2.0088
												11.585	4.05672	2.0603	2.0325
												11.592	4.05672	2.0457	2.0088
												11.601	4.05672	2.0428	2.0396
												11.609	4.05672	2.0223	2.0095
												11.618	4.05672	2.0358	2.0221
												11.626	4.05672	2.0332	2.0268
												11.635	4.05672	2.0424	2.0196
												11.643	4.05672	2.0439	2.0048
												11.651	4.05672	2.046	2.0049
												11.66	4.05672	2.0649	2.0238
												11.668	4.05672	2.0534	2.0307
												11.677	4.05672	2.0464	2.0221
												11.684	4.05672	2.033	2.008
												11.693	4.05672	2.0225	2.021
												11.701	4.05672	2.0362	2.0124
												11.71	4.05672	2.014	2.0077
												11.717	4.05672	2.0479	2.0148
												11.727	4.05672	2.0606	2.008
												11.735	4.05672	2.049	2.0316
												11.743	4.05672	2.052	2.0076
												11.751	4.05672	2.0557	2.026
												11.76	4.05672	2.0261	2.0436
												11.767	4.05672	2.0296	2.0244
												11.777	4.05672	2.0334	2.0121
												11.785	4.05672	2.0165	2.0195
												11.792	4.05672	2.0155	2.0176
												11.801	4.05672	2.0395	2.0259
												11.81	4.05672	2.025	2.0051
												11.817	4.05672	2.0568	2.0064
												11.827	4.05672	2.052	2.0162
												11.835	4.05672	2.0439	2.0171
												11.842	4.05672	2.0265	1.9988
												11.851	4.05672	2.0159	2.0064
												11.86	4.05672	2.036	2.0116
												11.867	4.05672	2.0452	2.035
												11.876	4.05672	2.0414	2.0219
												11.885	4.05672	2.0515	2.013
												11.894	4.05672	2.0406	2.0245
												11.901	4.05672	2.0326	2.0157
												11.91	4.05672	2.0417	2.0461
												11.917	4.05672	2.0472	2.0208
												11.926	4.05672	2.0363	2.0175
												11.935	4.05672	2.0349	2.0203
												11.942	4.05672	2.0438	2.0167
												11.952	4.05672	2.0512	2.0059
												11.96	4.05672	2.0173	2.0008
												11.967	4.05672	2.0079	1.9984
												11.977	4.05672	2.0211	1.9959
												11.985	4.05672	2.047	1.9882
												11.994	4.05672	2.0549	1.9905
												12.001	4.05672	2.0372	2.0156
												12.01	4.05672	2.0432	2.0042
												12.018	4.05672	2.0496	2.0129
												12.027	4.05672	2.0418	2.0005
												12.035	4.05672	2.033	2.0266
												12.043	4.05672	2.0534	2.0099
												12.052	4.05672	2.0514	2.0114
												12.06	4.05672	2.0472	2.0026
												12.068	4.05672	2.0324	2.0112
												12.076	4.05672	2.0491	1.9801
												12.085	4.05672	2.0192	2.0021
												12.092	4.05672	2.0197	2.0084
												12.101	4.05672	2.0302	2.0013
												12.11	4.05672	2.0208	2.017
												12.118	4.05672	2.0355	2.0171
												12.126	4.05672	2.0187	2.0208
												12.135	4.05672	2.0384	2.0142
												12.144	4.05672	2.0678	2.0319
												12.151	4.05672	2.0504	1.999
												12.16	4.05672	2.0595	2.0018
												12.167	4.05672	2.0439	2.0256
												12.176	4.05672	2.0584	2.0173
												12.185	4.05672	2.0607	1.9832
												12.193	4.05672	2.046	2.0205
												12.201	4.05672	2.0339	2.008
												12.209	4.05672	2.0346	2.0065
												12.217	4.05672	2.0244	2.0226
												12.226	4.05672	2.0137	2.0037
												12.234	4.05672	2.0459	2.0018
												12.243	4.05672	2.0335	2.0178
												12.251	4.05672	2.0249	2.0209
												12.26	4.05672	2.0081	1.9831
												12.268	4.05672	2.0141	2.0092
												12.276	4.05672	2.0216	1.9939
												12.284	4.05672	2.0196	2.0288
												12.293	4.05672	2.0547	2.0164
												12.302	4.05672	2.017	2.0128
												12.31	4.05672	2.0478	2.0354
												12.319	4.05672	2.0345	2.0391
												12.327	4.05672	2.051	1.9951
												12.336	4.05672	2.0225	2.0073
												12.344	4.05672	2.0445	1.9955
												12.353	4.05672	2.04	1.9937
												12.36	4.05672	2.0371	2.0111
												12.369	4.05672	2.0171	2.0315
												12.376	4.05672	2.054	2.0043
												12.385	4.05672	2.0283	2.0119
												12.393	4.05672	2.0206	2.0079
												12.402	4.05672	2.0291	2.0242
												12.41	4.05672	2.0427	2.0139
												12.418	4.05672	2.0612	2.0183
												12.427	4.05672	2.0402	2.0084
												12.435	4.05672	2.049	2.0181
												12.443	4.05672	2.0316	2.0069
												12.451	4.05672	2.0487	1.9738
												12.46	4.05672	2.018	1.9846
												12.469	4.05672	2.0493	2.0297
												12.477	4.05672	2.0655	1.984
												12.485	4.05672	2.0608	2.0255
												12.493	4.05672	2.0469	1.9959
												12.501	4.05672	2.0488	2.011
												12.51	4.05672	2.0457	2.0207
												12.519	4.05672	2.0439	2.0036
												12.527	4.05672	2.0448	2.0125
												12.535	4.05672	2.0425	2.0125
												12.544	4.05672	2.0349	2.0273
												12.552	4.05672	2.0219	2.0171
												12.561	4.05672	2.0647	2.0281
												12.569	4.05672	2.0463	2.009
												12.576	4.05672	2.0616	2.0427
												12.586	4.05672	2.0386	2.0073
												12.595	4.05672	2.0229	2.0172
												12.601	4.05672	2.0438	2.041
												12.611	4.05672	2.0187	2.0187
												12.619	4.05672	2.0604	2.0029
												12.628	4.05672	2.0619	2.0398
												12.635	4.05672	2.0174	2.0071
												12.644	4.05672	2.0275	2.0142
												12.651	4.05672	2.0329	2.0123
												12.661	4.05672	2.0382	1.9925
												12.668	4.05672	1.9848	2.0289
												12.677	4.05672	2.0413	2.0208
												12.685	4.05672	2.0354	2.0115
												12.693	4.05672	2.0366	1.9991
												12.701	4.05672	2.0344	2.0248
												12.711	4.05672	2.0324	2.0194
												12.719	4.05672	2.0694	2.0218
												12.726	4.05672	2.0218	2.0136
												12.735	4.05672	2.0142	2.0038
												12.744	4.05672	2.0214	2.0018
												12.751	4.05672	2.0308	2.0381
												12.76	4.05672	2.0649	2.005
												12.769	4.05672	2.006	2.015
												12.776	4.05672	1.9918	2.0172
												12.786	4.05672	2.0422	2.0095
												12.793	4.05672	2.0082	2.0175
												12.801	4.05672	2.0349	2.0314
												12.811	4.05672	2.0513	1.9938
												12.819	4.05672	2.0432	2.0066
												12.827	4.05672	2.0823	2.0282
												12.835	4.05672	2.056	2.0225
												12.844	4.05672	2.049	2.0276
												12.851	4.05672	2.0244	2.0079
												12.861	4.05672	2.0285	2.0145
												12.869	4.05672	2.0256	2.0058
												12.877	4.05672	2.0141	1.9987
												12.885	4.05672	2.0168	2.009
												12.893	4.05672	2.0245	1.999
												12.901	4.05672	2.0481	2.0337
												12.911	4.05672	2.0239	2.0133
												12.918	4.05672	1.9942	2.0234
												12.927	4.05672	2.0174	2.0201
												12.936	4.05672	2.0418	2.0227
												12.943	4.05672	2.0115	2.0093
												12.952	4.05672	2.0212	1.9886
												12.96	4.05672	2.0303	1.9794
												12.969	4.05672	2.0454	2.017
												12.976	4.05672	2.0566	2.0355
												12.986	4.05672	2.0369	2.0183
												12.993	4.05672	2.0241	1.9968
												13.001	4.05672	2.0216	2.0103
												13.011	4.05672	2.0241	2.0095
												13.018	4.05672	2.0532	2.0333
												13.027	4.05672	2.0047	2.0315
												13.035	4.05672	2.0408	2.0294
												13.044	4.05672	2.0424	2.0283
												13.051	4.05672	2.0332	2.0205
												13.061	4.05672	2.0496	2.0138
												13.068	4.05672	2.0464	2.0099
												13.077	4.05672	2.0496	2.0226
												13.086	4.05672	2.0358	2.0208
												13.095	4.05672	2.0446	2.0129
												13.101	4.05672	2.0625	2.0174
												13.11	4.05672	2.0285	2.0265
												13.119	4.05672	2.0258	2.0112
												13.127	4.05672	2.0361	2.0171
												13.135	4.05672	2.0415	2.0367
												13.144	4.05672	2.0343	1.993
												13.151	4.05672	2.0066	1.9968
												13.161	4.05672	2.0448	2.0038
												13.169	4.05672	2.0457	1.9843
												13.176	4.05672	2.0391	1.9863
												13.186	4.05672	2.0248	2.0026
												13.195	4.05672	2.0293	1.9848
												13.201	4.05672	2.0266	1.9996
												13.211	4.05672	2.0544	1.9987
												13.219	4.05672	2.0568	2.0415
												13.227	4.05672	2.0659	1.9967
												13.236	4.05672	2.0524	2.0115
												13.243	4.05672	2.0429	1.9922
												13.252	4.05672	2.055	1.999
												13.261	4.05672	2.0457	1.9986
												13.268	4.05672	2.0468	1.9778
												13.277	4.05672	2.0205	1.992
												13.285	4.05672	2.0501	1.9942
												13.294	4.05672	2.0341	2.0182
												13.301	4.05672	2.0176	2.0165
												13.311	4.05672	2.0327	2.0105
												13.319	4.05672	2.0139	2.0226
												13.326	4.05672	2.0113	1.974
												13.335	4.05672	2.0219	2.0434
												13.343	4.05672	2.0173	2.0316
												13.352	4.05672	2.0131	1.9907
												13.36	4.05672	1.9833	2.0084
												13.369	4.05672	1.992	1.982
												13.377	4.05672	2.0157	1.9728
												13.385	4.05672	2.0143	2.0049
												13.393	4.05672	2.0236	2.0107
												13.402	4.05672	1.998	2.0029
												13.41	4.05672	2.0267	2.0341
												13.419	4.05672	2.0366	2.0359
												13.427	4.05672	2.0354	2.0126
												13.436	4.05672	2.0422	2.0161
												13.444	4.05672	2.0478	2.0115
												13.451	4.05672	2.0112	2.0134
												13.461	4.05672	2.0487	2.0335
												13.468	4.05672	2.0404	2.0029
												13.477	4.05672	2.0284	2.0085
												13.485	4.05672	2.0421	2.0168
												13.494	4.05672	2.0465	2.0266
												13.501	4.05672	2.0495	2.0142
												13.51	4.05672	2.0504	2.0019
												13.519	4.05672	2.0364	1.9818
												13.527	4.05672	2.0473	2.057
												13.535	4.05672	1.9912	1.9992
												13.543	4.05672	2.0366	1.9958
												13.552	4.05672	1.9977	1.9953
												13.559	4.05672	2.0175	2.0214
												13.569	4.05672	1.9945	2.0328
												13.577	4.05672	2.0262	2.0232
												13.585	4.05672	2.0506	2.0063
												13.595	4.05672	2.0325	1.9944
												13.603	4.05672	2.0435	1.9973
												13.609	4.05672	2.0457	2.0203
												13.619	4.05672	2.0297	1.9964
												13.627	4.05672	2.024	2.0092
												13.635	4.05672	2.0442	2.0236
												13.644	4.05672	2.0388	2.0196
												13.651	4.05672	2.0207	1.9853
												13.66	4.05672	2.0504	1.9993
												13.668	4.05672	2.0305	2.0211
												13.677	4.05672	2.0468	2.0303
												13.686	4.05672	2.0384	2.0246
												13.693	4.05672	2.0339	2.0169
												13.701	4.05672	2.0283	2.0444
												13.71	4.05672	2.0251	2.0214
												13.718	4.05672	2.0337	2.0281
												13.727	4.05672	2.0302	2.0072
												13.736	4.05672	2.0608	2.0397
												13.743	4.05672	2.0128	2.0112
												13.752	4.05672	2.0215	2.0017
												13.76	4.05672	2.0517	2.0083
												13.768	4.05672	2.047	2.0193
												13.777	4.05672	2.072	2.0167
												13.785	4.05672	2.0373	1.9955
												13.795	4.05672	2.0486	2.0037
												13.801	4.05672	2.0359	1.9919
												13.81	4.05672	2.0606	2.0282
												13.818	4.05672	2.0252	2.0247
												13.827	4.05672	2.0198	2.0298
												13.834	4.05672	2.0233	2.0108
												13.844	4.05672	2.0363	2.0229
												13.851	4.05672	2.0395	2.0241
												13.86	4.05672	2.0287	2.006
												13.868	4.05672	2.0187	2.014
												13.877	4.05672	2.0264	2.0007
												13.884	4.05672	2.0245	2.0226
												13.893	4.05672	2.0038	1.9975
												13.902	4.05672	2.0395	2.0147
												13.91	4.05672	2.0293	2.0004
												13.919	4.05672	2.0409	1.9778
												13.926	4.05672	1.9988	2.0236
												13.936	4.05672	2.0084	2.0113
												13.943	4.05672	2.0376	2.0487
												13.952	4.05672	2.0473	2.0403
												13.959	4.05672	2.0667	1.9879
												13.969	4.05672	2.0521	2.0115
												13.976	4.05672	2.0554	2.0072
												13.986	4.05672	2.0392	2.0153
												13.993	4.05672	2.009	2.0017
												14.001	4.05672	2.0155	2.009
												14.01	4.05672	2.0268	2.0034
												14.019	4.05672	2.0208	2.0303
												14.026	4.05672	2.0286	2.0224
												14.035	4.05672	2.0174	2.0076
												14.044	4.05672	2.0313	2.0376
												14.052	4.05672	2.0334	1.996
												14.059	4.05672	2.0095	1.9918
												14.068	4.05672	1.9893	2.0072
												14.076	4.05672	2.0267	1.9972
												14.085	4.05672	2.0628	1.9784
												14.094	4.05672	2.0512	1.9809
												14.101	4.05672	2.0352	1.9665
												14.11	4.05672	2.0333	1.9833
												14.118	4.05672	2.0522	2.006
												14.127	4.05672	1.9868	2.0016
												14.135	4.05672	2.0233	1.994
												14.144	4.05672	2.0253	2.0137
												14.152	4.05672	2.0541	1.9872
												14.161	4.05672	2.0436	2.0021
												14.168	4.05672	2.0109	2.0195
												14.177	4.05672	1.9991	2.0351
												14.184	4.05672	1.9706	2.0088
												14.193	4.05672	1.9772	2.0379
												14.202	4.05672	2.0103	2.0383
												14.209	4.05672	2.0177	2.0132
												14.218	4.05672	2.024	2.0192
												14.226	4.05672	2.0028	2.0036
												14.235	4.05672	2.0253	1.9955
												14.243	4.05672	2.0246	2.0034
												14.252	4.05672	2.0386	2.0348
												14.26	4.05672	2.0334	2.0096
												14.268	4.05672	2.0747	1.9885
												14.277	4.05672	2.047	1.9796
												14.284	4.05672	2.015	1.99
												14.294	4.05672	2.0391	2.0015
												14.302	4.05672	2.0564	2.0021
												14.31	4.05672	2.0473	2.0254
												14.318	4.05672	2.0385	2.0245
												14.327	4.05672	2.0322	2.0247
												14.334	4.05672	2.0526	2.0289
												14.343	4.05672	2.0368	2.0224
												14.352	4.05672	2.0465	2.0022
												14.359	4.05672	2.0483	2.0199
												14.368	4.05672	2.0229	2.0437
												14.376	4.05672	2.0375	2.0114
												14.385	4.05672	2.0184	2.019
												14.393	4.05672	2.0474	2.0235
												14.401	4.05672	2.0245	2.022
												14.41	4.05672	2.0507	1.9967
												14.418	4.05672	2.0318	1.9799
												14.427	4.05672	2.0114	2.0393
												14.434	4.05672	2.0348	2.0167
												14.443	4.05672	1.9986	1.9933
												14.451	4.05672	2.0386	1.9867
												14.46	4.05672	2.0804	2
												14.468	4.05672	2.0155	2.0136
												14.477	4.05672	2.04	2.0269
												14.484	4.05672	2.0431	2.0134
												14.494	4.05672	2.0427	2.0309
												14.501	4.05672	2.0387	2.0251
												14.51	4.05672	2.0319	1.9962
												14.519	4.05672	2.0423	1.9864
												14.526	4.05672	2.0288	2.0143
												14.535	4.05672	2.021	1.9967
												14.542	4.05672	2.0331	2.0059
												14.552	4.05672	2.0139	2.0091
												14.56	4.05672	1.9982	2.0296
												14.569	4.05672	2.0089	2.0329
												14.576	4.05672	2.0261	1.9966
												14.585	4.05672	2.0326	2.0229
												14.593	4.05672	2.0015	2.0395
												14.601	4.05672	2.0687	2.0207
												14.61	4.05672	2.0448	1.9862
												14.619	4.05672	2.0396	1.9987
												14.626	4.05672	2.0525	2.0364
												14.635	4.05672	2.0293	2.0141
												14.643	4.05672	1.9918	1.9827
												14.652	4.05672	2.0425	1.9812
												14.66	4.05672	2.0349	2.0132
												14.669	4.05672	2.0205	2.0136
												14.676	4.05672	2.0415	2.0131
												14.685	4.05672	2.0333	2.0035
												14.692	4.05672	2.0243	2.0219
												14.701	4.05672	2.0271	1.9834
												14.709	4.05672	2.023	2.0021
												14.718	4.05672	2.0202	2.0365
												14.727	4.05672	2.0022	2.0063
												14.734	4.05672	2.0194	2.0088
												14.744	4.05672	1.9988	1.9982
												14.751	4.05672	2.0078	2.0018
												14.76	4.05672	2.02	2.022
												14.767	4.05672	2.0448	2.0108
												14.777	4.05672	1.9894	2.0147
												14.784	4.05672	2.0433	2.0131
												14.793	4.05672	2.0301	2.0219
												14.801	4.05672	2.0254	1.9679
												14.81	4.05672	2.0394	2.0029
												14.819	4.05672	2.0096	1.9903
												14.826	4.05672	2.0167	2.013
												14.835	4.05672	2.0291	2.0023
												14.842	4.05672	2.0134	2.0056
												14.852	4.05672	2.0335	2.0255
												14.859	4.05672	2.0073	2.0344
												14.869	4.05672	2.0315	2.0205
												14.877	4.05672	2.0387	2.0241
												14.884	4.05672	2.0304	2.0256
												14.892	4.05672	2.0101	2.033
												14.901	4.05672	2.041	2.0055
												14.91	4.05672	2.0554	2.0214
												14.919	4.05672	2.0429	2.0159
												14.926	4.05672	2.0447	2.0101
												14.935	4.05672	2.0401	2.0168
												14.944	4.05672	2.067	2.0334
												14.951	4.05672	2.0752	2.0144
												14.96	4.05672	2.0527	2.0232
												14.968	4.05672	2.0382	1.9995
												14.976	4.05672	2.0307	1.9929
												14.985	4.05672	2.0342	2.002
												14.992	4.05672	2.0379	1.9999
												15.001	4.05672	2.041	2.0011
												15.009	4.05672	2.0436	2.0197
												15.019	4.05672	2.0644	1.9904
												15.026	4.05672	2.0488	2.0213
												15.035	4.05672	2.0222	2.031
												15.043	4.05672	2.0289	2.029
												15.052	4.05672	2.0615	2.0236
												15.059	4.05672	2.0486	2.0157
												15.068	4.05672	2.0417	2.0048
												15.077	4.05672	2.0361	1.9889
												15.084	4.05672	2.0332	2.0207
												15.093	4.05672	2.0508	1.9993
												15.102	4.05672	2.0295	1.9837
												15.109	4.05672	2.0346	1.9989
												15.118	4.05672	2.0217	2.0046
												15.127	4.05672	2.0441	2.0356
												15.135	4.05672	2.0498	2.025
												15.143	4.05672	2.0314	2.0011
												15.152	4.05672	2.0391	1.9835
												15.159	4.05672	2.0483	1.9962
												15.168	4.05672	2.0236	2.01
												15.176	4.05672	2.0272	2.0108
												15.185	4.05672	2.0539	1.9901
												15.194	4.05672	2.0429	1.9971
												15.201	4.05672	2.0594	2.0354
												15.209	4.05672	2.0326	2.0182
												15.218	4.05672	2.0188	2.0323
												15.227	4.05672	2.0328	2.0218
												15.234	4.05672	2.0554	1.9915
												15.243	4.05672	2.0669	2.0289
												15.252	4.05672	2.0292	2.0285
												15.259	4.05672	2.0634	2.0095
												15.268	4.05672	2.0527	2.0151
												15.276	4.05672	2.0243	2.0048
												15.285	4.05672	2.0128	2.046
												15.294	4.05672	2.0288	1.9949
												15.301	4.05672	2.05	2.0006
												15.31	4.05672	2.0427	1.9993
												15.317	4.05672	2.0543	2.014
												15.327	4.05672	2.0471	2.0237
												15.334	4.05672	2.0483	2.0095
												15.343	4.05672	2.0561	2.0002
												15.352	4.05672	2.0246	2.0114
												15.36	4.05672	2.0405	2.0119
												15.367	4.05672	2.0536	2.0231
												15.377	4.05672	2.0501	2.0358
												15.384	4.05672	2.0502	2.006
												15.393	4.05672	2.0444	2.039
												15.402	4.05672	2.0407	1.9852
												15.409	4.05672	2.0383	1.9934
												15.418	4.05672	2.0194	2.0379
												15.426	4.05672	2.0328	2.0126
												15.435	4.05672	2.0641	2.0235
												15.443	4.05672	2.0503	2.0299
												15.452	4.05672	2.014	2.006
												15.459	4.05672	2.0521	2.0279
												15.468	4.05672	2.0743	1.9969
												15.477	4.05672	2.0508	2.0314
												15.484	4.05672	2.0397	2.0379
												15.492	4.05672	2.0417	2.0078
												15.501	4.05672	2.0209	2.0085
												15.51	4.05672	2.0287	2.0262
												15.517	4.05672	2.0451	2.0057
												15.527	4.05672	2.065	2.0343
												15.536	4.05672	2.0452	2.0428
												15.542	4.05672	2.0697	2.0216
												15.551	4.05672	2.0199	2.0176
												15.56	4.05672	2.0217	2.0123
												15.569	4.05672	2.0136	2.0312
												15.576	4.05672	2.0484	2.0299
												15.584	4.05672	2.0614	2.0008
												15.592	4.05672	2.0472	2.0221
												15.602	4.05672	2.0371	2.0198
												15.61	4.05672	2.0266	1.9941
												15.618	4.05672	2.0249	2.0042
												15.626	4.05672	2.0149	2.01
												15.635	4.05672	2.0127	1.9979
												15.642	4.05672	2.0321	2.0215
												15.651	4.05672	2.0303	2.0272
												15.659	4.05672	2.0226	2.0304
												15.668	4.05672	1.9805	1.9825
												15.676	4.05672	2.0331	1.9843
												15.685	4.05672	2.0419	2.0111
												15.692	4.05672	2.0199	2.0243
												15.701	4.05672	2.0059	2.0204
												15.71	4.05672	2.0441	2.0197
												15.719	4.05672	2.0195	2.0001
												15.726	4.05672	2.0293	2.0155
												15.735	4.05672	2.03	1.9639
												15.742	4.05672	2.0178	2.0144
												15.751	4.05672	2.0277	2.0228
												15.76	4.05672	2.0221	2.0393
												15.767	4.05672	2.0255	2.0404
												15.777	4.05672	2.0392	2.0241
												15.784	4.05672	2.0249	2.0379
												15.792	4.05672	2.0285	2.0151
												15.801	4.05672	2.0188	2.0176
												15.809	4.05672	2.0152	2.0394
												15.818	4.05672	2.0358	2.0046
												15.826	4.05672	2.0134	2.0226
												15.835	4.05672	2.0508	2.0038
												15.843	4.05672	2.0373	1.9957
												15.852	4.05672	2.0579	2.0243
												15.86	4.05672	2.012	2.0022
												15.867	4.05672	2.0271	2.0035
												15.876	4.05672	2.0439	2.0289
												15.884	4.05672	2.054	1.9987
												15.894	4.05672	2.0477	1.9939
												15.901	4.05672	2.0344	2.0098
												15.91	4.05672	2.0314	2.0114
												15.917	4.05672	2.061	1.9972
												15.926	4.05672	2.0323	2.0148
												15.934	4.05672	2.0542	1.999
												15.943	4.05672	2.0411	2.005
												15.95	4.05672	2.0547	2.0159
												15.96	4.05672	2.0483	1.9951
												15.967	4.05672	2.0227	1.9874
												15.976	4.05672	2.0484	1.9971
												15.984	4.05672	2.0293	1.9815
												15.992	4.05672	2.0333	1.9842
												16.001	4.05672	2.0312	1.9886
												16.01	4.05672	2.0629	2.0255
												16.017	4.05672	2.0658	2.0087
												16.026	4.05672	2.0201	1.9985
												16.034	4.05672	2.0208	2.0165
												16.043	4.05672	2.0288	1.9886
												16.052	4.05672	2.0321	1.9984
												16.059	4.05672	2.0188	2.0301
												16.068	4.05672	2.0436	2.0012
												16.077	4.05672	2.0419	2.0182
												16.084	4.05672	2.0531	2.0105
												16.094	4.05672	2.0155	2.0264
												16.1	4.05672	2.0509	2.0236
												16.109	4.05672	2.0392	2.0247
												16.118	4.05672	2.0601	1.9829
												16.126	4.05672	2.0354	2.0195
												16.134	4.05672	2.0527	2.0089
												16.143	4.05672	2.0457	2.0248
												16.15	4.05672	2.0775	2.0073
												16.16	4.05672	2.0586	2.0252
												16.167	4.05672	2.0264	2.0207
												16.176	4.05672	2.0512	2.0201
												16.184	4.05672	2.0344	2.0337
												16.193	4.05672	1.9937	2.0092
												16.2	4.05672	2.0242	2.0396
												16.21	4.05672	2.0385	2.0283
												16.217	4.05672	2.037	2.0215
												16.226	4.05672	2.0274	2.0081
												16.235	4.05672	2.0246	2.0009
												16.242	4.05672	2.0156	2.0091
												16.251	4.05672	2.0433	1.9715
												16.259	4.05672	2.0595	2.0427
												16.268	4.05672	2.0563	2.0153
												16.275	4.05672	2.0415	1.996
												16.284	4.05672	2.0462	1.9947
												16.292	4.05672	2.0522	2.0168
												16.301	4.05672	2.0328	2.0193
												16.309	4.05672	2.0326	2.0166
												16.318	4.05672	2.0536	2.0043
												16.327	4.05672	2.076	2.0154
												16.334	4.05672	2.0265	2.0304
												16.343	4.05672	2.0394	2.0312
												16.35	4.05672	2.0511	2.0186
												16.36	4.05672	2.0477	2.0233
												16.367	4.05672	2.0445	2.0142
												16.376	4.05672	2.0395	1.9911
												16.385	4.05672	2.0212	2.0392
												16.392	4.05672	2.0237	2.0131
												16.4	4.05672	2.0437	2.0203
												16.409	4.05672	2.0595	2.0418
												16.418	4.05672	2.0285	2.0219
												16.425	4.05672	2.0577	2.0047
												16.434	4.05672	2.0355	2.0104
												16.442	4.05672	2.0126	1.9854
												16.45	4.05672	2.0292	1.9887
												16.459	4.05672	2.0586	2.0059
												16.468	4.05672	2.0535	2.0148
												16.475	4.05672	2.0465	1.9999
												16.484	4.05672	2.0374	2.0283
												16.492	4.05672	2.0032	2.0201
												16.5	4.05672	2.0242	2.0483
												16.509	4.05672	2.0393	2.0279
												16.518	4.05672	2.0114	2.0181
												16.526	4.05672	2.0079	1.9984
												16.534	4.05672	2.0181	1.9946
												16.543	4.05672	2.0423	2.0207
												16.55	4.05672	2.042	2.0235
												16.559	4.05672	2.0608	1.9948
												16.568	4.05672	2.0278	2.0029
												16.576	4.05672	2.0034	1.9984
												16.585	4.05672	2.0411	1.9877
												16.592	4.05672	2.0297	1.9937
												16.6	4.05672	2.0535	1.9967
												16.609	4.05672	2.0452	2.0382
												16.618	4.05672	2.0571	2.0047
												16.625	4.05672	2.036	2.0302
												16.634	4.05672	2.0452	2.001
												16.642	4.05672	2.0342	2.0212
												16.651	4.05672	2.0301	2.0267
												16.659	4.05672	2.0609	1.9914
												16.668	4.05672	2.0541	2.0365
												16.675	4.05672	2.0374	2.0141
												16.685	4.05672	2.016	2.002
												16.692	4.05672	2.0535	2.0378
												16.7	4.05672	2.0284	2.042
												16.709	4.05672	2.0511	2.0056
												16.718	4.05672	2.0187	1.9982
[truncated: 11,217 more rows]
