# Supplementary material for: CTP promotes efficient ParB-dependent DNA condensation by facilitating one-dimensional diffusion from parS
Source: eLife. 2021 Jul 12;10:e67554. doi: 10.7554/eLife.67554 (PMC8299390; doi:10.7554/eLife.67554)
Supplement: Figure 6—source data 1. [file elife-67554-fig6-data1.xlsx]

## Sheet: Figure6
Figure 6A	2 mM CTP	4 mM MgCl2					Figure 6B							Figure 6D											Figure 6F
		Scrambled parS DNA							13x parS DNA							13x parS DNA		7x parS DNA		13x parS DNA		13x parS DNA					1x parS DNA		1x parS DNA		2x parS DNA		4x parS DNA
		No ParB		200 nM ParB2					No ParB		200 nM ParB2 R149G					No ParB		200 nM ParB2		200 nM ParB2		200 nM ParB2					No ParB		200 nM ParB2		200 nM ParB2		200 nM ParB2
	Force	Extension	SEM	Extension	SEM			Force	Extension	SEM	Extension	SEM			Force	Extension	SEM	Extension	SEM	Extension	SEM	Extension	SEM			Force	Extension	SEM	Extension	SEM	Extension	SEM	Extension	SEM
	4.96913	0.91974	0.01463	0.90234	0.02528			4.96913	0.92821	0.00819	0.94337	0.01539			4.96913	0.9098	0.01133	0.93042	0.01036	0.89974	0.01845	0.88478	0.02637			4.96913	0.94244	0.04556	0.97118	0.01862	0.90183	0.00696	0.92249	0.0306
	4.64421	0.91537	0.01527	0.89494	0.02532			4.64421	0.92506	0.00809	0.93705	0.01379			4.59814	0.90562	0.01147	0.92849	0.01048	0.89685	0.01839	0.88153	0.02545			4.64421	0.94654	0.04444	0.97082	0.01932	0.90149	0.00676	0.91929	0.02956
	4.34053	0.91277	0.01566	0.89465	0.02491			4.34053	0.92419	0.008	0.93578	0.01525			4.30767	0.90383	0.01107	0.92762	0.01135	0.89804	0.01991	0.8793	0.02459			4.34053	0.94667	0.04314	0.96865	0.01939	0.89664	0.00601	0.91696	0.02906
	3.79146	0.90356	0.01587	0.89228	0.02636			3.79146	0.91776	0.00736	0.92897	0.01589			3.78444	0.89591	0.01073	0.9194	0.01154	0.89652	0.02205	0.86726	0.02432			3.79146	0.9438	0.04096	0.96448	0.01944	0.89276	0.00555	0.91173	0.02782
	3.31184	0.89852	0.01639	0.88765	0.02573			3.31184	0.91406	0.00726	0.92201	0.01512			3.32535	0.88936	0.01065	0.91016	0.01155	0.89541	0.02168	0.85798	0.02448			3.31184	0.93612	0.03876	0.95347	0.01996	0.88995	0.00593	0.90587	0.0278
	2.52694	0.88467	0.01645	0.87544	0.02524			2.52694	0.90144	0.00654	0.90654	0.01537			2.50865	0.87366	0.01044	0.892	0.01103	0.88505	0.02241	0.84927	0.03253			2.52694	0.92811	0.03789	0.93478	0.02271	0.881	0.00639	0.89129	0.02627
	1.68416	0.86873	0.01604	0.86272	0.02498			1.68416	0.88002	0.00565	0.88686	0.01496			1.91377	0.85427	0.01051	0.87311	0.01243	0.87041	0.02263	0.7807	0.05339			1.68416	0.92136	0.03622	0.91936	0.02578	0.87093	0.00641	0.87859	0.02495
	1.28502	0.83849	0.01524	0.84001	0.02484			1.28502	0.84793	0.00724	0.85929	0.01498			1.28207	0.81843	0.01083	0.83243	0.01316	0.8469	0.02252	0.6193	0.12486			1.28502	0.89828	0.03344	0.90117	0.03229	0.84066	0.00826	0.85098	0.02321
	1.12247	0.82593	0.01543	0.83241	0.02447			1.12247	0.83005	0.00875	0.84873	0.01368			1.1155	0.80479	0.01159	0.81727	0.01264	0.83432	0.0216	0.56632	0.14637			1.12247	0.8885	0.02974	0.89296	0.03509	0.83083	0.00815	0.84258	0.0232
	0.65347	0.77562	0.01247	0.79792	0.02296			0.65347	0.77377	0.01067	0.78869	0.0124			0.85691	0.7776	0.01402	0.73424	0.02455	0.63157	0.05048	0.21789	0.08573			0.65347	0.84905	0.02233	0.83191	0.0432	0.78878	0.00856	0.7921	0.02241
	0.43553	0.71915	0.01756	0.75993	0.02483			0.43553	0.72333	0.01137	0.73693	0.01484			0.64871	0.7363	0.01386	0.64801	0.04925	0.25761	0.05043	0.08274	0.031			0.43553	0.80637	0.02338	0.76872	0.04823	0.74996	0.00897	0.74557	0.02317
	0.33231	0.69727	0.01823	0.72457	0.02513			0.33231	0.67245	0.01262	0.6991	0.01352			0.56934	0.71867	0.01462	0.43237	0.08312	0.15227	0.03458	0.05704	0.02746			0.33231	0.68913	0.05807	0.71843	0.05519	0.72772	0.00963	0.71051	0.02522
	0.16899	0.58432	0.02129	0.5978	0.02325			0.16899	0.54868	0.01214	0.56352	0.01578			0.50035	0.69736	0.0157	0.11771	0.01808	0.08286	0.01638	0.04091	0.01867			0.16899	0.59025	0.01794	0.56444	0.07418	0.6032	0.01744	0.57696	0.02109
	0.11263	0.485	0.02337	0.50896	0.0233			0.11263	0.44923	0.01304	0.46062	0.01706			0.43294	0.67283	0.01638	0.08281	0.02403	0.07655	0.01699	0.04226	0.01821			0.11263	0.48838	0.01791	0.46639	0.07538	0.5129	0.01527	0.45789	0.02151
	0.08593	0.41319	0.02136	0.43939	0.02511			0.08593	0.42843	0.01481	0.38306	0.01418			0.33025	0.62268	0.01808	0.06562	0.01376	0.06914	0.02146	0.03889	0.01605			0.08593	0.4575	0.02915	0.41525	0.06079	0.4234	0.02098	0.35863	0.02609
	0.0437	0.26456	0.0155	0.30632	0.01827			0.0437	0.21565	0.01767	0.23466	0.00955			0.25256	0.5712	0.01917	0.06058	0.01097	0.05572	0.01944	0.02904	0.01263			0.0437	0.28983	0.02933	0.29806	0.03955	0.2851	0.01489	0.19656	0.01683
	0.02222	0.19467	0.00719	0.2209	0.01331			0.02222	0.1556	0.01241	0.15413	0.00801			0.2213	0.54471	0.01992	0.05687	0.01032	0.05529	0.01675	0.01397	0.0115			0.02222	0.17754	0.03225	0.23079	0.00226	0.2193	0.01299	0.14965	0.01216
	0.0113	0.16645	0.00887	0.19048	0.01039			0.0113	0.12996	0.01294	0.11494	0.01149			0.1683	0.48411	0.02001	0.06076	0.00799	0.05317	0.0166	0.01379	0.01152			0.0113	0.13475	0.0247	0.21928	0.01938	0.18538	0.00904	0.11935	0.01659
	0.00292	0.16392	0.0081	0.16928	0.00546			0.00292	0.12669	0.01143	0.09189	0.01572			0.11188	0.38416	0.01915	0.06696	0.00534	0.05389	0.0169	0.01439	0.0121			0.00292	0.11183	0.02745	0.20998	0.00644	0.19213	0.01193	0.10581	0.01806
	0.00149	0.16049	0.00817	0.1653	0.00802			0.00149	0.1202	0.01028	0.08805	0.01623			0.08551	0.32053	0.01575	0.06052	0.00394	0.05815	0.01547	0.01263	0.01191			0.00149	0.10617	0.02764	0.14444	0.01665	0.19977	0.01244	0.10073	0.02001
	--							--	--	--	--	--
	--							--	--	--
